# Supplementary material for: Intensified biogeodynamical carbon cycling by subduction controlled early Earth glaciations and oxygenation
Source: Research Square preprint supplement (doi:10.21203/rs.3.rs-8738396/v1), 2026-02-02
Supplement: Supplementary file 1 [file 77c44f39a8394968c1f12070.pdf]

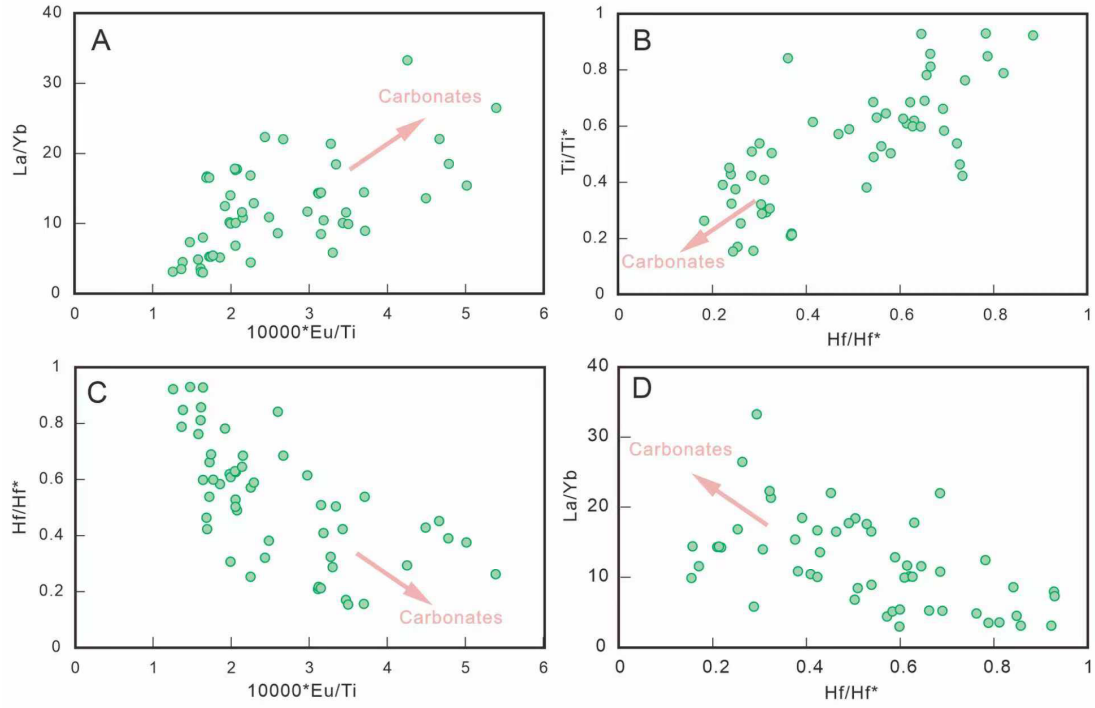

**Extended Data Fig. 1** Variations of (A) La/Yb versus  $10000 \times \text{Eu}/\text{Ti}$ , (B)  $\text{Ti}/\text{Ti}^*$  versus  $\text{Hf}/\text{Hf}^*$ , (C)  $\text{Hf}/\text{Hf}^*$  versus  $10000 \times \text{Eu}/\text{Ti}$ , and (D) La/Yb versus  $\text{Hf}/\text{Hf}^*$  for the studied

Neoarchean basalts. Elemental anomalies are calculated as follows:  $\text{Ti}/\text{Ti}^* =$

$$\text{Ti}_N / (\text{Sm}_N^{-0.055} \times \text{Nd}_N^{0.333} \times \text{Gd}_N^{0.722}), \text{Hf}/\text{Hf}^* = \text{Hf}_N / (\text{Sm}_N \times \text{Nd}_N)^{0.5}, \text{ where the}$$

subscript N means normalized to the primitive mantle.

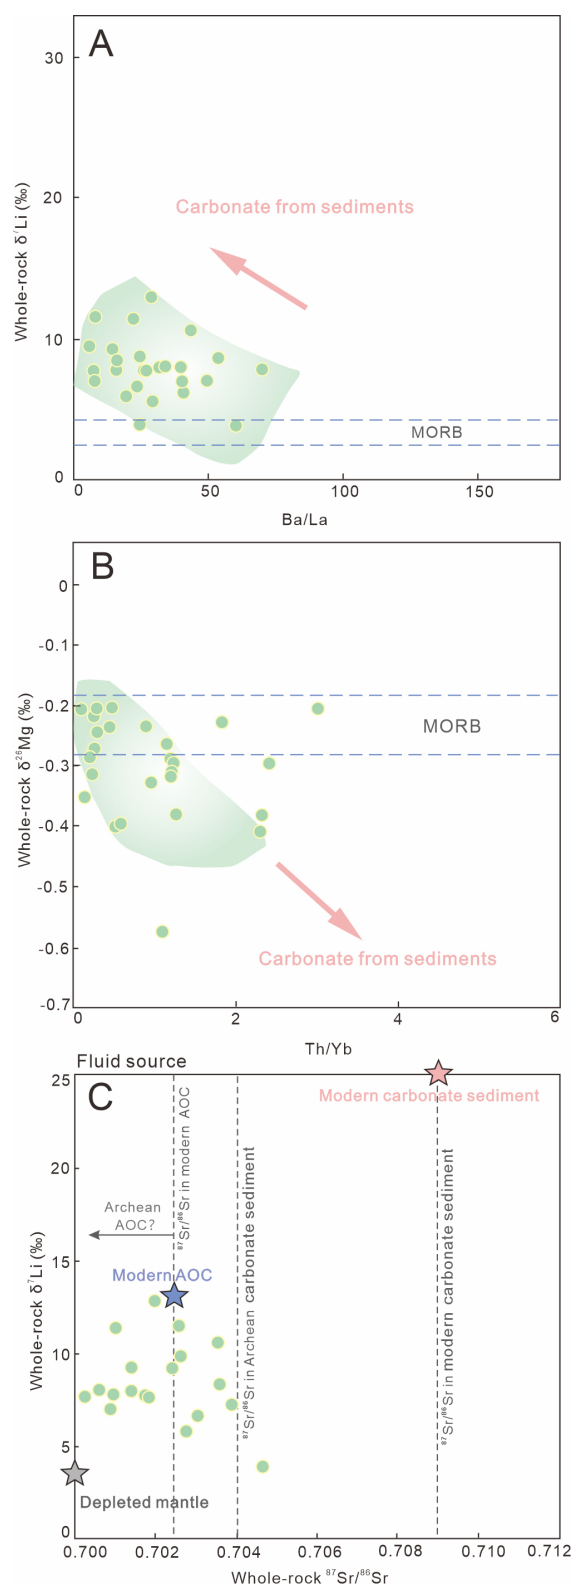

**Extended Data Fig. 2** Isotopic and elemental ratios constrain the origins of carbon and fluids. (A) Plots of  $\delta^7\text{Li}$  versus Ba/La, (B) Plots of  $\delta^{26}\text{Mg}$  versus Th/Yb and (C) Plots of  $\delta^7\text{Li}$  versus  $^{87}\text{Sr}/^{86}\text{Sr}$ .

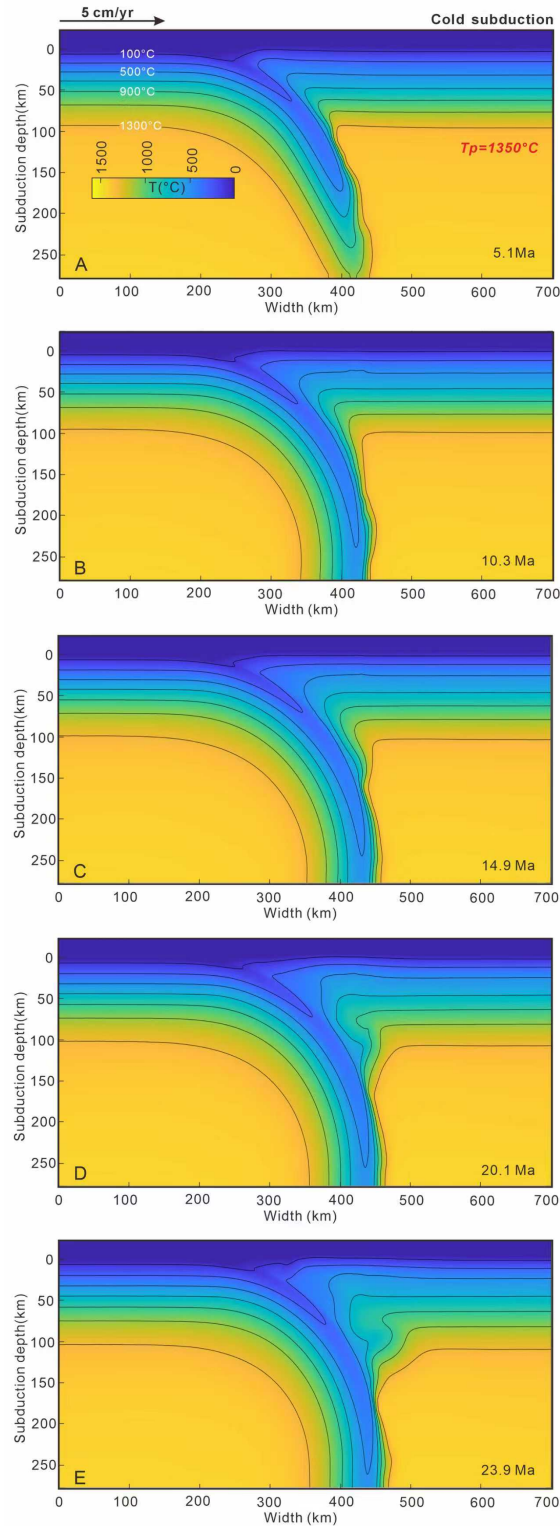

**Extended Data Fig. 3** The temporal change in the subduction P-T field under the condition of  $T_p = 1350^\circ\text{C}$  (modern).

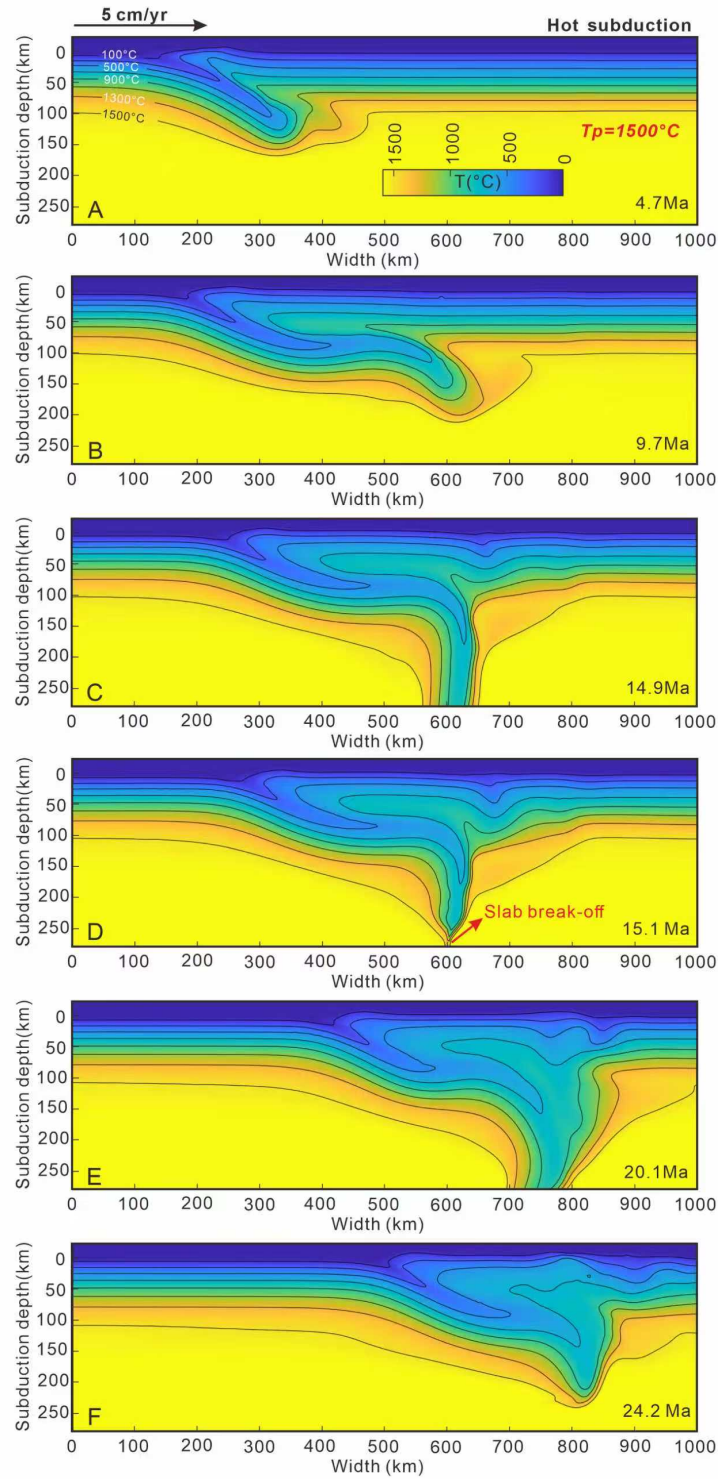

**Extended Data Fig. 4** The temporal change in the subduction P-T field under the condition of  $T_p = 1500^{\circ}\text{C}$  (Archean-Paleoproterozoic).

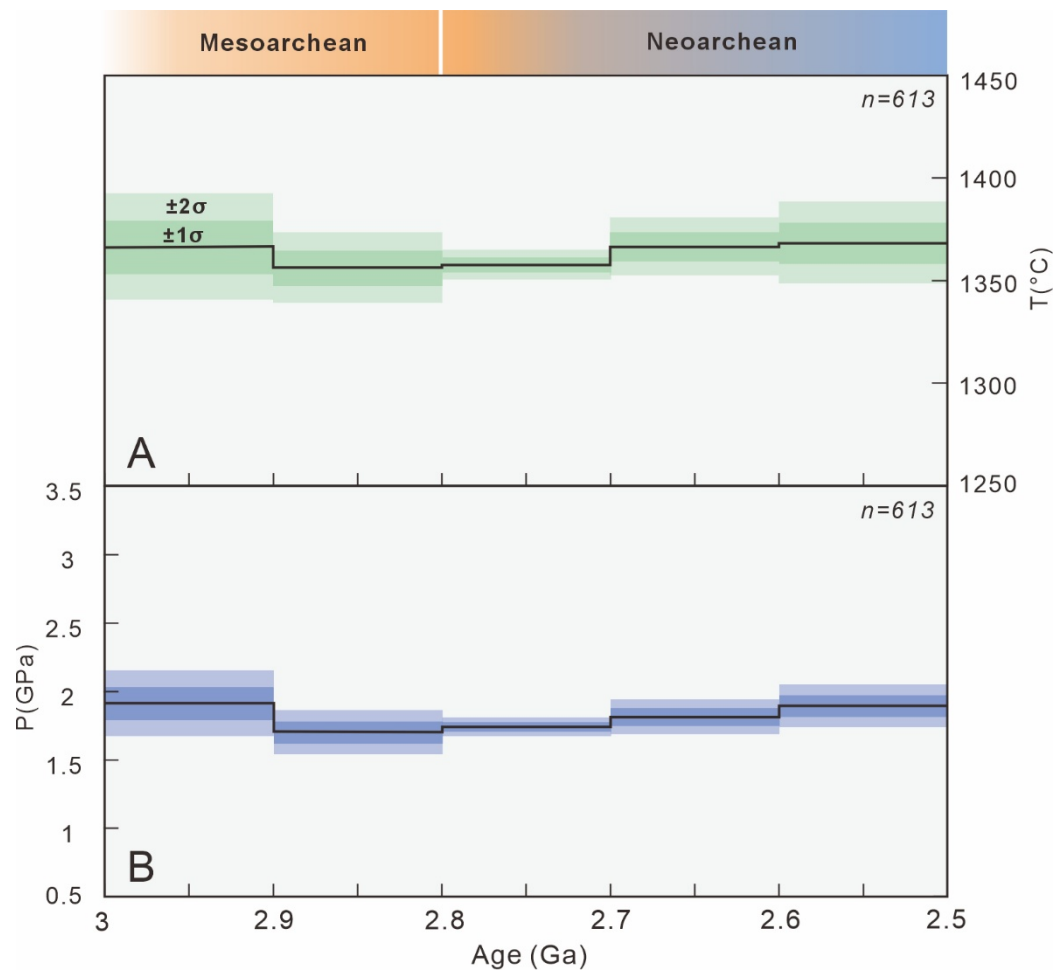

**Extended Data Fig. 5** Formation Temperature and Pressure of Primary Arc Basalts over Time (3-2.5 Ga)

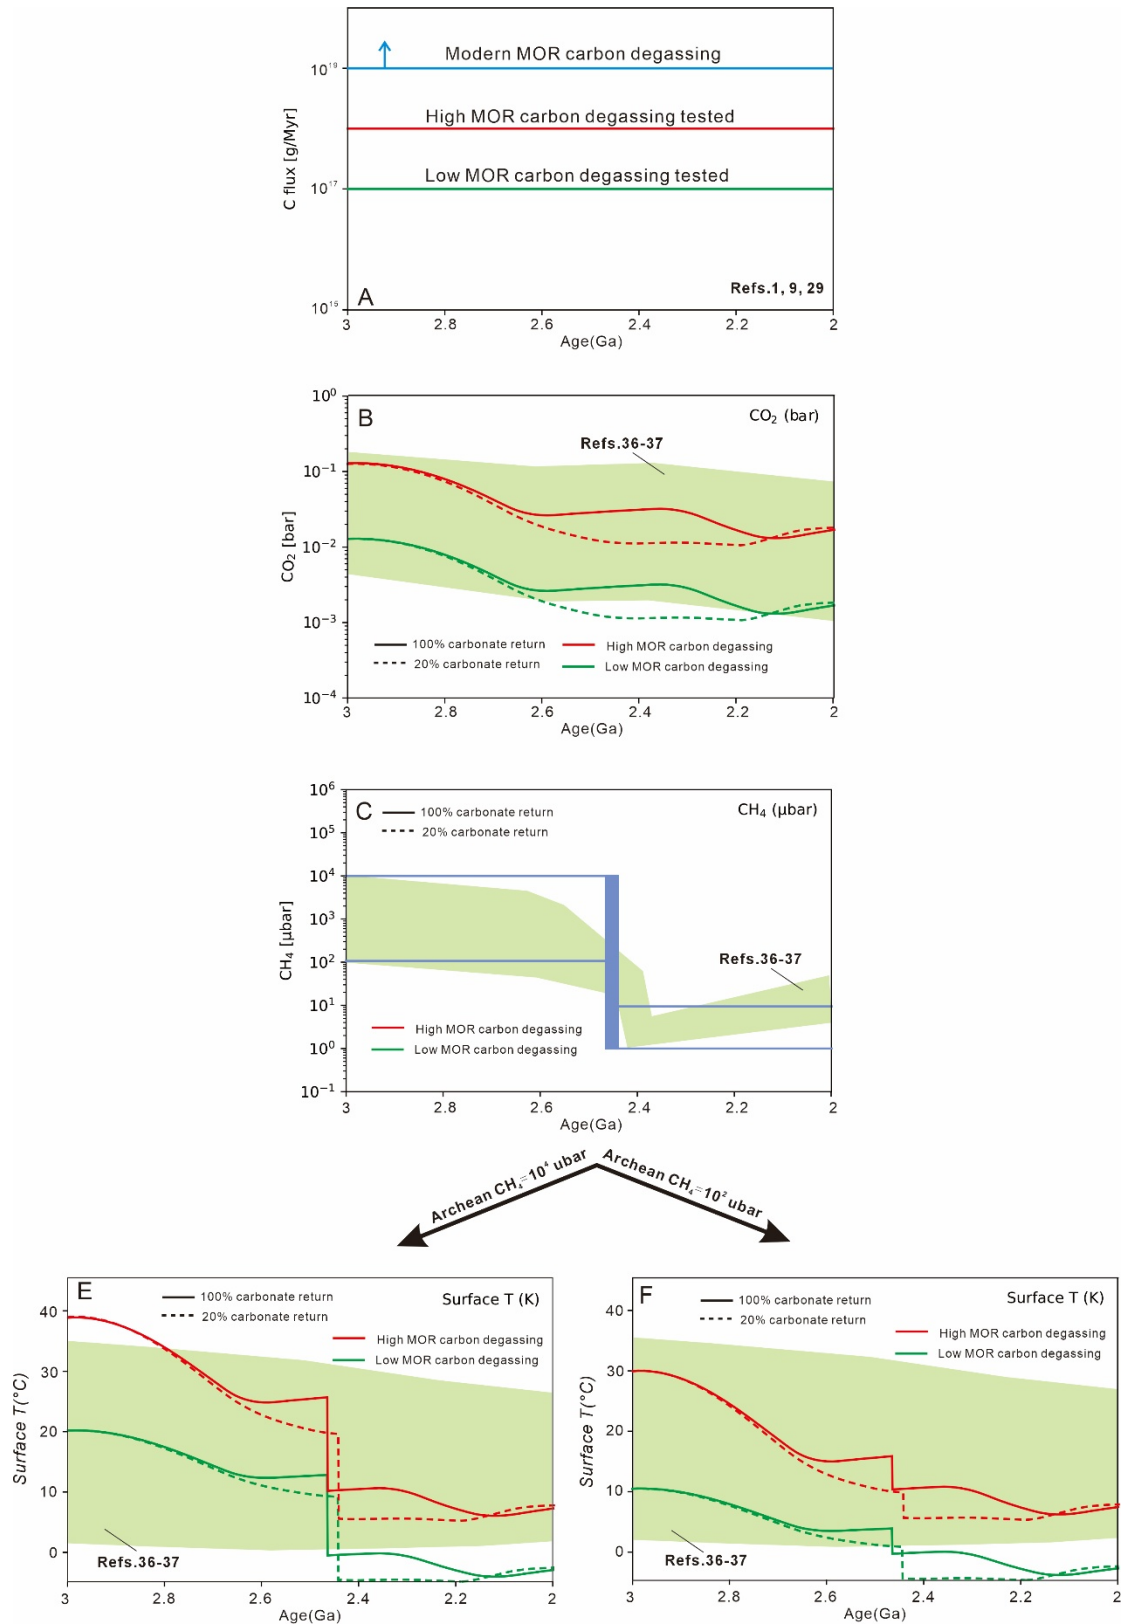

**Extended Data Fig. 6** The tests of different initial MOR degassing and CH<sub>4</sub> concentrations in C-O box models collectively demonstrate the moderating effect of enhanced subduction biogeodynamic carbon cycling on temperature. The green background is a reference range in previous studies.

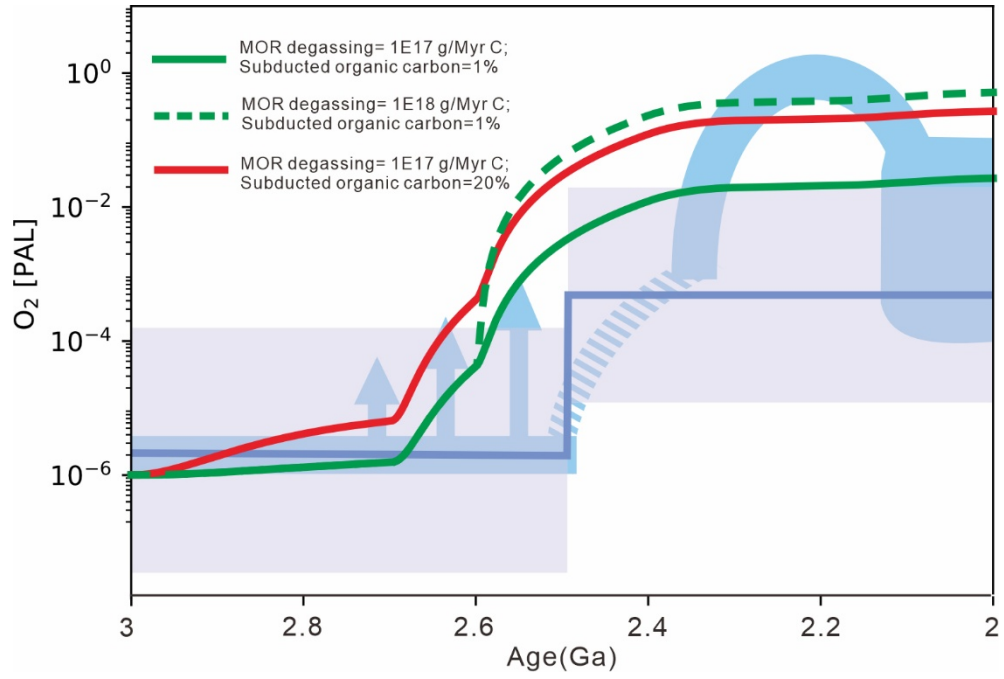

**Extended Data Fig. 7** The tests of different initial MOR degassing and proportion of organic carbon in sediment in C-O box models collectively demonstrate the moderating effect of enhanced subduction biogeodynamic carbon cycling on  $O_2$  levels.
