# Supplementary material for: Intensified biogeodynamical carbon cycling by subduction controlled early Earth glaciations and oxygenation
Source: Research Square preprint supplement (doi:10.21203/rs.3.rs-8738396/v1), 2026-02-02
Supplement: Supplementary file 1 [file 89c29c0b71d0eb76ae9bcdc7.xlsx]

## Sheet: Sheet1
Table A2. Bulk composition in wt% of different layers in the subduction slab.
	Layers	SiO2	Al2O3	FeOT	MgO	CaO	Na2O	K2O	H2O	CO2
	ASediments (type 1; GLOSS II)	57.392	12.6851	5.74934	2.78848	6.30704	2.53498	2.24092	7.18921	3.11296
	BSediments (type 2; limestone+SiO2)	98.36	0	0	0	0.92	0	0	Saturation	0.72
	BSediments (type 3; dolostone+SiO2)	98.62	0	0	0	0.66	0	0	Saturation	0.72
	Chydrated basalt (AOC)/dry basalt	49.7	16.26	10.35	7.16	10.95	2.22	0.1	3/0.01	0.1
	CDry gabbro	50.5	16.4	10.43	7.83	11.53	2.24	0.1	0.01	0.1
	DSerpentinized mantle	43.9182	2.31687	7.87224	42.9837	0.652	0	0	2	0.02
A-The bulk composition of type 1 sediments is GLOSS II from Plank, (2013).
B-The bulk compositions of type 2 and 3 sediments are from Stewart and Penman, (2024).
C-The bulk compositions of mafic rocks are from Pearce, (1976).
D-The bulk composition of serpentinized mantle is from Jennings et al. (2016) and Deschamps et al. (2013).
References
Plank, T., 2013. The Chemical Composition of Subducting Sediments, 2nd ed, Treatise on Geochemistry: Second Edition. Elsevier Ltd.
Stewart, E. M., & Penman, D. E. (2024). Enhanced metamorphic CO2 release on the Proterozoic Earth. Proc. Natl. Acad. Sci. U.S.A. 121(40), e2401961121.
Pearce, J.A., 1976. Statistical analysis of major element patterns in basalts. J. Petrol. 17, 15–43.
Deschamps, F., Godard, M., Guillot, S., Hattori, K., 2013. Geochemistry of subduction zone serpentinites: A review. Lithos 178, 96–127.
