# Supplementary material for: Intensified biogeodynamical carbon cycling by subduction controlled early Earth glaciations and oxygenation
Source: Research Square preprint supplement (doi:10.21203/rs.3.rs-8738396/v1), 2026-02-02
Supplement: Supplementary file 2 [file 8c105cb58ba53ace13890793.xlsx]

## Sheet: Ba
Craton	REFERENCE	SAMPLE_ID	ROCK_NAME	LATITUDE	LONGITUDE	C_AGE	Arc_probability3	SIO2	TIO2	AL2O3	FEOT	MNO	MGO	CAO	NA2O	K2O	P2O5	BA
Pilbara	USE OF GEOCHEMISTRY AS A GUIDE TO PLATINUM GROUP ELEMENT POTENTIAL OF MAFIC-ULTRAMAFIC ROCKS; EXAMPLES FROM THE WEST PILBARA BLOCKS AND HALLS CREEK MOBILE ZONE, WESTERN AUSTRALIA	NGV2	BASALT	-21	118	3000	0.928887	53.63	0.4	11.21	9.16	0.16	10.99	7.9	1.77	0.55	0.04	225
western superior province	PLUME MAGMATISM AND CRUSTAL GROWTH AT 2.9 TO 3.0 GA IN THE STEEP ROCK AND LUMBY LAKE AREA, WESTERN SUPERIOR PROVINCE	96KYT18	BASALT	49	-91	2986	0.995833	49.93	1.39	12.36	8.46	0.15	11.49	8.48	3.07	1.01	0.3	486
Superior	USING SEDIMENT GEOCHEMISTRY AND DETRITAL ZIRCON GEOCHRONOLOGY TO CATEGORIZE ERODED IGNEOUS UNITS: AN EXAMPLE FROM THE MESOARCHEAN BIRCH-UCHI GREENSTONE BELT, SUPERIOR PROVINCE	BA-5	BASALT	51.1	-92.6	2975	0.986586	49.96	0.85	4.31	14.19	0.22	15.55	12.81	0.36	0.12	0.05	16.26
SW Greenland	TRACE ELEMENT SYSTEMATICS OF THE NEOARCHEAN FISKENÆSSET ANORTHOSITE COMPLEX AND ASSOCIATED META-VOLCANIC ROCKS, SW GREENLAND: EVIDENCE FOR A MAGMATIC ARC ORIGIN	478864	BASALT	63.1264	-50.3014	2973	0.989454	49.6	1.08	14.2	13.23	0.22	7.8	9.8	2	0.4	0.08	104
SW Greenland	TRACE ELEMENT SYSTEMATICS OF THE NEOARCHEAN FISKENÆSSET ANORTHOSITE COMPLEX AND ASSOCIATED META-VOLCANIC ROCKS, SW GREENLAND: EVIDENCE FOR A MAGMATIC ARC ORIGIN	497124	BASALT	63.0195	-49.4662	2973	0.984773	47	0.77	16.1	10.62	0.26	6.8	15.1	1.8	0.4	0.06	97
SW Greenland	TRACE ELEMENT SYSTEMATICS OF THE NEOARCHEAN FISKENÆSSET ANORTHOSITE COMPLEX AND ASSOCIATED META-VOLCANIC ROCKS, SW GREENLAND: EVIDENCE FOR A MAGMATIC ARC ORIGIN	497109	BASALT	63.0234	-49.4691	2973	0.975309	48.4	0.73	15.9	11.61	0.19	7.8	12.1	1.9	0.1	0.05	40
SW Greenland	TRACE ELEMENT SYSTEMATICS OF THE NEOARCHEAN FISKENÆSSET ANORTHOSITE COMPLEX AND ASSOCIATED META-VOLCANIC ROCKS, SW GREENLAND: EVIDENCE FOR A MAGMATIC ARC ORIGIN	478857	BASALT	63.1258	-50.2969	2973	0.990024	48.8	0.9	14.8	12.51	0.19	8.2	11.4	1.6	0.3	0.07	36
SW Greenland	TRACE ELEMENT SYSTEMATICS OF THE NEOARCHEAN FISKENÆSSET ANORTHOSITE COMPLEX AND ASSOCIATED META-VOLCANIC ROCKS, SW GREENLAND: EVIDENCE FOR A MAGMATIC ARC ORIGIN	497131	BASALT	63.201	-49.2789	2973	0.911378	46.9	1.17	16.2	12.78	0.2	8	10.1	2.9	0.2	0.09	36
SW Greenland	TRACE ELEMENT SYSTEMATICS OF THE NEOARCHEAN FISKENÆSSET ANORTHOSITE COMPLEX AND ASSOCIATED META-VOLCANIC ROCKS, SW GREENLAND: EVIDENCE FOR A MAGMATIC ARC ORIGIN	478862	BASALT	63.1261	-50.3003	2973	0.990081	48.7	0.97	14.9	12.42	0.2	8.3	11.3	1.5	0.2	0.08	34
SW Greenland	TRACE ELEMENT SYSTEMATICS OF THE NEOARCHEAN FISKENÆSSET ANORTHOSITE COMPLEX AND ASSOCIATED META-VOLCANIC ROCKS, SW GREENLAND: EVIDENCE FOR A MAGMATIC ARC ORIGIN	497134	BASALT	63.197	-49.2828	2973	0.995563	47.8	0.76	16.4	10.26	0.17	9.1	11.2	2.7	0.5	0.06	31
SW Greenland	TRACE ELEMENT SYSTEMATICS OF THE NEOARCHEAN FISKENÆSSET ANORTHOSITE COMPLEX AND ASSOCIATED META-VOLCANIC ROCKS, SW GREENLAND: EVIDENCE FOR A MAGMATIC ARC ORIGIN	497142	BASALT	63.1235	-49.8218	2973	0.990945	48.7	0.71	15.4	10.17	0.19	7.6	12.8	2.5	0.8	0.06	29
SW Greenland	TRACE ELEMENT SYSTEMATICS OF THE NEOARCHEAN FISKENÆSSET ANORTHOSITE COMPLEX AND ASSOCIATED META-VOLCANIC ROCKS, SW GREENLAND: EVIDENCE FOR A MAGMATIC ARC ORIGIN	478811	BASALT	63.1367	-50.6175	2973	0.903792	47.3	0.9	15.2	11.34	0.22	6.7	15.1	1.7	0.3	0.06	20
SW Greenland	TRACE ELEMENT SYSTEMATICS OF THE NEOARCHEAN FISKENÆSSET ANORTHOSITE COMPLEX AND ASSOCIATED META-VOLCANIC ROCKS, SW GREENLAND: EVIDENCE FOR A MAGMATIC ARC ORIGIN	478813	BASALT	63.1283	-50.6133	2973	0.985762	47.4	0.65	14.5	11.79	0.17	7	15.5	1.5	0.2	0.05	15
Southwest Greenland	AN OVERVIEW OF THE GEOCHEMISTRY OF EOARCHEAN TO MESOARCHEAN ULTRAMAFIC TO MAFIC VOLCANIC ROCKS, SW GREENLAND: IMPLICATIONS FOR MANTLE DEPLETION AND PETROGENETIC PROCESSES AT SUBDUCTION ZONES IN THE EARLY EARTH	508074	BASALT	63	-49.5	2970	0.980377	47.6	0.83	16.7	11.79	0.2	9	9.8	2.4	0.34	0.06	133
Southwest Greenland	AN OVERVIEW OF THE GEOCHEMISTRY OF EOARCHEAN TO MESOARCHEAN ULTRAMAFIC TO MAFIC VOLCANIC ROCKS, SW GREENLAND: IMPLICATIONS FOR MANTLE DEPLETION AND PETROGENETIC PROCESSES AT SUBDUCTION ZONES IN THE EARLY EARTH	508066	BASALT	63	-49.5	2970	0.98817	47.2	0.92	15.2	13.14	0.24	8.4	10.8	2.3	0.28	0.06	41
Southwest Greenland	AN OVERVIEW OF THE GEOCHEMISTRY OF EOARCHEAN TO MESOARCHEAN ULTRAMAFIC TO MAFIC VOLCANIC ROCKS, SW GREENLAND: IMPLICATIONS FOR MANTLE DEPLETION AND PETROGENETIC PROCESSES AT SUBDUCTION ZONES IN THE EARLY EARTH	508069	BASALT	63	-49.5	2970	0.916348	47.6	0.99	15.3	12.78	0.22	8.5	10.8	2	0.22	0.07	39
Southwest Greenland	AN OVERVIEW OF THE GEOCHEMISTRY OF EOARCHEAN TO MESOARCHEAN ULTRAMAFIC TO MAFIC VOLCANIC ROCKS, SW GREENLAND: IMPLICATIONS FOR MANTLE DEPLETION AND PETROGENETIC PROCESSES AT SUBDUCTION ZONES IN THE EARLY EARTH	508079	BASALT	63	-49.5	2970	0.934402	46.2	1.1	16.4	13.05	0.22	7.3	12.2	1.9	0.13	0.09	29
Aldan shield	SM-ND AGE AND GEOCHEMISTRY OF METAVOLCANICS FROM THE OLODINSKII GREENSTONE BELT (ALDAN SHIELD)	86226	BASALT	57.03	120.72	2966	0.937061	47.89	0.75	14.28	12.47	0.18	9.7	11.17	2	0.3	0.03	110
Aldan shield	SM-ND AGE AND GEOCHEMISTRY OF METAVOLCANICS FROM THE OLODINSKII GREENSTONE BELT (ALDAN SHIELD)	85140	BASALT	57.03	120.72	2966	0.995805	47.74	0.71	14.99	9.22	0.21	10.8	12.83	1.34	0.01	0.03	105
Eastern Transvaal, south Africa	A GEOCHEMICAL STUDY OF A PRECAMBRIAN MAFIC DYKE SWARM, EASTERN TRANSVAAL, SOUTH AFRICA	BA-10	THOLEIITE	-25.8	30.5	2965.9	0.983499	53.06	0.6	14.24	9.76	0.17	8.61	9.32	2.45	0.85	0.09	162
Superior	TWO KOMATIITIC PYROCLASTIC UNITS, SUPERIOR PROVINCE, NORTHWESTERN ONTARIO: THEIR GEOLOGY, PETROGRAPHY, AND CORRELATION	SS-528	BASALT	48.75	-93	2965.5	0.999501	47.7	1.3	6.5	17.82	0.3	11	12.3	0.78	0.36	0.05	41
Pilbara	ARCHEAN BONINITE-LIKE ROCKS IN AN INTRACRATONIC SETTING	142360	BASALT	-20.8	117.8	2965	0.999402	49.21	0.17	13.44	8.48	0.17	16.06	6.1	0.63	1.16	0.03	188
Pilbara	ARCHEAN BONINITE-LIKE ROCKS IN AN INTRACRATONIC SETTING	142359	BASALT	-20.8	117.8	2965	0.999463	52.69	0.24	17.67	7.63	0.17	8.64	7.41	2.68	0.09	0.04	80
Pilbara	ARCHEAN BONINITE-LIKE ROCKS IN AN INTRACRATONIC SETTING	142194	BASALT	-20.8	117.8	2965	0.992467	53.51	0.26	17.12	8.11	0.16	8.22	8.11	1.65	0.39	0.05	68
Pilbara	ARCHEAN BONINITE-LIKE ROCKS IN AN INTRACRATONIC SETTING	142368	BASALT	-20.8	117.8	2965	0.966069	52.65	0.26	16.65	8.67	0.17	7.97	8.1	1.73	0.18	0.04	41
Pilbara	EVIDENCE FOR EARLY LREE-ENRICHED MANTLE SOURCE REGIONS: DIVERSE MAGMAS FROM THE C. 3.0 GA MALLINA BASIN, PILBARA CRATON, NW AUSTRALIA	142-281	BASALT	-20.8	117.8	2960	0.969374	53.99	0.48	12.6	9.08	0.16	8.65	8.17	2.2	1.07	0.06	661.25
Uchi-Confederation, Canada	THE GEOCHEMISTRY OF REPETITIVE CYCLICAL VOLCANISM FROM BASALT THROUGH RHYOLITE IN THE UCHI-CONFEDERATION GREENSTONE BELT, CANADA	473	BASALT	51.08	-92.53	2958.6	0.999171	47.2	1.83	13.8	17.6	0.34	6.15	9.76	2.7	0.27	0.09	93
Uchi-Confederation, Canada	THE GEOCHEMISTRY OF REPETITIVE CYCLICAL VOLCANISM FROM BASALT THROUGH RHYOLITE IN THE UCHI-CONFEDERATION GREENSTONE BELT, CANADA	421	BASALT	51.1	-92.83	2958.6	0.916607	50.2	0.71	15.8	11.2	0.2	8.34	10.7	2.24	0.32	0.04	62
Uchi-Confederation, Canada	THE GEOCHEMISTRY OF REPETITIVE CYCLICAL VOLCANISM FROM BASALT THROUGH RHYOLITE IN THE UCHI-CONFEDERATION GREENSTONE BELT, CANADA	420	BASALT	51.1	-92.83	2958.6	0.98623	49.1	0.76	16.3	10.5	0.22	9.17	11.7	1.81	0.23	0.04	44
Tipasjärvi-Kuhmo-Suomussalmi, Finland	ARCHEAN EVOLUTION OF THE TIPASJÄRVI-KUHMO-SUOMUSSALMI GREENSTONE COMPLEX, FINLAND	20SMS 60-8/198.30	basalt	65.1459	29.0719	2942	0.985048	46.98	0.69	9.36	12.4	0.207	16.09	6.96	0.27	1.28	0.045	158
Tipasjärvi-Kuhmo-Suomussalmi, Finland	ARCHEAN EVOLUTION OF THE TIPASJÄRVI-KUHMO-SUOMUSSALMI GREENSTONE COMPLEX, FINLAND	20SMS 60-1/28.50	basalt	65.1459	29.0719	2942	0.985648	51.06	0.53	6.71	10.16	0.191	16.79	10.9	0.47	0.05	0.013	16
Northern Superior Province	ALLOCHTHONOUS 2.78 GA OCEANIC PLATEAU SLIVERS IN A 2.72 GA CONTINENTAL ARC SEQUENCE; VIZIEN GREENSTONE BELT, NORTHEASTERN SUPERIOR PROVINCE, CANADA	PBA92-2008C	ANDESITE	58.08	-73	2940	0.9941	52.5	0.96	14.4	9.23	0.15	7.67	8.96	3.9	0.17	0.09	100
Northern Superior Province	ALLOCHTHONOUS 2.78 GA OCEANIC PLATEAU SLIVERS IN A 2.72 GA CONTINENTAL ARC SEQUENCE; VIZIEN GREENSTONE BELT, NORTHEASTERN SUPERIOR PROVINCE, CANADA	PBA92-2008G	BASALT	58.08	-73	2940	0.942235	52.4	0.52	11.9	9.12	0.18	12.1	8.88	2.7	0.06	0.04	40
Brazil	GEOCHEMISTRY OF METAVOLCANIC ROCKS IN THE ARCHEAN GREENSTONE BELT OF IDENTIDADE, SE PARA, BRAZIL	57A	THOLEIITE	-6.5	-49.5	2935	0.998162	49.3	0.9	16.25	12.36	0.21	7.91	11.07	1.09	0.31	0.18	99
Brazil	GEOCHEMISTRY OF METAVOLCANIC ROCKS IN THE ARCHEAN GREENSTONE BELT OF IDENTIDADE, SE PARA, BRAZIL	56B	THOLEIITE	-6.5	-49.5	2935	0.992738	48.99	0.9	16.06	12.44	0.2	7.68	11.25	1.65	0.28	0.2	71
Brazil	GEOCHEMISTRY OF METAVOLCANIC ROCKS IN THE ARCHEAN GREENSTONE BELT OF IDENTIDADE, SE PARA, BRAZIL	9	THOLEIITE	-6.5	-49.5	2935	0.949097	50.12	0.83	14.79	12.15	0.21	8.02	11.31	1.87	0.31	0.18	58
Brazil	GEOCHEMISTRY OF METAVOLCANIC ROCKS IN THE ARCHEAN GREENSTONE BELT OF IDENTIDADE, SE PARA, BRAZIL	478	THOLEIITE	-6.5	-49.5	2935	0.951244	48.66	0.86	16.21	12.12	0.21	7.4	11.15	2.62	0.4	0.16	58
Brazil	GEOCHEMISTRY OF METAVOLCANIC ROCKS IN THE ARCHEAN GREENSTONE BELT OF IDENTIDADE, SE PARA, BRAZIL	32A	THOLEIITE	-6.5	-49.5	2935	0.996934	49.37	0.86	15.13	12.18	0.21	8	11.86	1.78	0.2	0.18	48
Brazil	GEOCHEMISTRY OF METAVOLCANIC ROCKS IN THE ARCHEAN GREENSTONE BELT OF IDENTIDADE, SE PARA, BRAZIL	266B	THOLEIITE	-6.5	-49.5	2935	0.983458	50.5	0.8	15.07	12.15	0.23	7.83	11.45	1.35	0.21	0.18	45
Brazil	GEOCHEMISTRY OF METAVOLCANIC ROCKS IN THE ARCHEAN GREENSTONE BELT OF IDENTIDADE, SE PARA, BRAZIL	168	THOLEIITE	-6.5	-49.5	2935	0.998304	48.93	0.7	15.84	10.81	0.19	8.62	12.91	1.58	0.08	0.17	24
Brazil	GEOCHEMISTRY OF METAVOLCANIC ROCKS IN THE ARCHEAN GREENSTONE BELT OF IDENTIDADE, SE PARA, BRAZIL	270C	THOLEIITE	-6.5	-49.5	2935	0.997611	49.53	0.7	15.79	10.72	0.18	8.55	12.12	2.02	0.08	0.17	20
Pilbara	USE OF GEOCHEMISTRY AS A GUIDE TO PLATINUM GROUP ELEMENT POTENTIAL OF MAFIC-ULTRAMAFIC ROCKS; EXAMPLES FROM THE WEST PILBARA BLOCKS AND HALLS CREEK MOBILE ZONE, WESTERN AUSTRALIA	83330096	THOLEIITE	-21	117.1	2925	0.989497	53.48	0.57	14.75	8.25	0.12	6.55	8.01	1.89	1.57	0.08	259
North Caribou terrane, Superior	MESO- AND NEOARCHEAN EVOLUTION OF THE ISLAND LAKE GREENSTONE BELT AND THE NORTHWESTERN SUPERIOR PROVINCE: EVIDENCE FROM LITHOGEOCHEMISTRY, ND ISOTOPE DATA, AND U-PB ZIRCON GEOCHRONOLOGY	102-98-812	BASALT	53.856	-94.2387	2897	0.988322	52.0075	0.7761	15.418	10.68	0.2038	7.2641	9.0335	2.7732	0.8382	0.0828	348.043
North Caribou terrane, Superior	MESO- AND NEOARCHEAN EVOLUTION OF THE ISLAND LAKE GREENSTONE BELT AND THE NORTHWESTERN SUPERIOR PROVINCE: EVIDENCE FROM LITHOGEOCHEMISTRY, ND ISOTOPE DATA, AND U-PB ZIRCON GEOCHRONOLOGY	52-IL-98-12	BASALT	53.8309	-94.2451	2897	0.950284	51.5468	0.673	14.2286	11.02	0.2633	10.3565	6.7916	3.3702	0.4712	0.0615	144
Northern Superior Province	CONSTRAINTS ON EARLY ARCHEAN CRUSTAL EXTRACTION AND THOLEIITIC-KOMATIITIC VOLCANISM IN GREENSTONE BELTS OF NORTHERN SUPERIOR PROVINCE	17	BASALT	59.8	-72	2878	0.980474	48.67	0.54	12.87	10.77	0.25	11.54	11.4	1.48	0.27	0.03	34
NW Tanzania	GEOCHEMISTRY AND PETROGENESIS OF VOLCANIC ROCKS OF THE NEOARCHAEAN SUKUMALAND GREENSTONE BELT, NORTHWESTERN TANZANIA	R38	ANDESITE	-3.08	32.4	2873	0.982879	48.85	0.71	16.1	9.11	0.24	6.54	13.6	2.06	0.17	0.07	117
NW Tanzania	GEOCHEMISTRY AND PETROGENESIS OF VOLCANIC ROCKS OF THE NEOARCHAEAN SUKUMALAND GREENSTONE BELT, NORTHWESTERN TANZANIA	R39	ANDESITE	-3.08	32.4	2873	0.936009	48.66	0.73	16.61	8.57	0.18	8.36	12.84	2.01	0.07	0.09	115
NW Tanzania	GEOCHEMISTRY AND PETROGENESIS OF VOLCANIC ROCKS OF THE NEOARCHAEAN SUKUMALAND GREENSTONE BELT, NORTHWESTERN TANZANIA	R12	BASALT	-3.08	32.4	2873	0.942395	48.32	0.53	15.5	9.76	0.2	8.76	11.59	1.53	0.12	0.09	28
NW Tanzania	GEOCHEMISTRY AND PETROGENESIS OF VOLCANIC ROCKS OF THE NEOARCHAEAN SUKUMALAND GREENSTONE BELT, NORTHWESTERN TANZANIA	R13	BASALT	-3.08	32.4	2873	0.920868	47.9	0.55	15.76	9.94	0.18	8.86	11.41	1.64	0.1	0.09	23
NW Tanzania	GEOCHEMISTRY AND PETROGENESIS OF VOLCANIC ROCKS OF THE NEOARCHAEAN SUKUMALAND GREENSTONE BELT, NORTHWESTERN TANZANIA	R78	BASALT	-3.08	32.4	2873	0.933785	51.4	0.82	13.67	10.36	0.15	8.7	9.9	1.19	0.09	0.09	23
Belingwe	GEOCHEMISTRY OF THE IGNEOUS ROCKS OF THE BELINGWE GREENSTONE BELT: ALTERATION, CONTAMINATION AND PETROGENESIS	SL715	BASALT	-20	30	2870	0.998838	52.04	1.18	9.8	11.11	0.2	9.14	12.2	1.77	1.41	0.1	556
Belingwe	GEOCHEMISTRY OF THE IGNEOUS ROCKS OF THE BELINGWE GREENSTONE BELT: ALTERATION, CONTAMINATION AND PETROGENESIS	SL713	BASALT	-20	30	2870	0.99941	49.67	1.16	9.79	11.81	0.21	9.08	12.9	1.55	1.17	0.1	461
Belingwe	GEOCHEMISTRY OF THE IGNEOUS ROCKS OF THE BELINGWE GREENSTONE BELT: ALTERATION, CONTAMINATION AND PETROGENESIS	SL780	BASALT	-20	30	2870	0.998022	52.55	0.51	10.03	10.66	0.17	14.2	8.97	2.28	0	0.06	305
Belingwe	GEOCHEMISTRY OF THE IGNEOUS ROCKS OF THE BELINGWE GREENSTONE BELT: ALTERATION, CONTAMINATION AND PETROGENESIS	SL745	BASALT	-20	30	2870	0.999301	45.54	0.83	11.81	12.81	0.21	14.9	9.55	1.07	0.31	0.08	226
Belingwe	GEOCHEMISTRY OF THE IGNEOUS ROCKS OF THE BELINGWE GREENSTONE BELT: ALTERATION, CONTAMINATION AND PETROGENESIS	SL716	BASALT	-20	30	2870	0.99523	48.01	1.3	10.01	13.67	0.23	9.83	13.65	0.92	0.44	0.11	203
Belingwe	GEOCHEMISTRY OF THE IGNEOUS ROCKS OF THE BELINGWE GREENSTONE BELT: ALTERATION, CONTAMINATION AND PETROGENESIS	SL785	BASALT	-20	30	2870	0.998961	52.78	0.7	10.63	11.21	0.18	11.07	9.55	2.63	0.26	0.08	142
Belingwe	GEOCHEMISTRY OF THE IGNEOUS ROCKS OF THE BELINGWE GREENSTONE BELT: ALTERATION, CONTAMINATION AND PETROGENESIS	SL526	BASALT	-20	30	2870	0.996141	51.75	1.22	10.39	12.08	0.2	8.78	12.47	1.99	0.17	0.11	129
Belingwe	GEOCHEMISTRY OF THE IGNEOUS ROCKS OF THE BELINGWE GREENSTONE BELT: ALTERATION, CONTAMINATION AND PETROGENESIS	SL719	BASALT	-20	30	2870	0.995824	51.35	0.7	10.59	11.9	0.19	12.98	9.25	2.15	0.11	0.08	116
Belingwe	GEOCHEMISTRY OF THE IGNEOUS ROCKS OF THE BELINGWE GREENSTONE BELT: ALTERATION, CONTAMINATION AND PETROGENESIS	SL499	NOT-GIVEN	-20	30	2870	0.999292	53.22	0.81	14.07	9.43	0.14	7.69	10.53	1.92	0.2	0.1	113
Belingwe	GEOCHEMISTRY OF THE IGNEOUS ROCKS OF THE BELINGWE GREENSTONE BELT: ALTERATION, CONTAMINATION AND PETROGENESIS	SL740	BASALT	-20	30	2870	0.997811	53.15	0.73	11.1	11.19	0.17	10.44	9.4	2.8	0.17	0.08	112
Belingwe	GEOCHEMISTRY OF THE IGNEOUS ROCKS OF THE BELINGWE GREENSTONE BELT: ALTERATION, CONTAMINATION AND PETROGENESIS	SL720	BASALT	-20	30	2870	0.992843	51.12	0.68	10.17	11.43	0.18	12.98	8.87	2.29	0.11	0.08	109
Belingwe	GEOCHEMISTRY OF THE IGNEOUS ROCKS OF THE BELINGWE GREENSTONE BELT: ALTERATION, CONTAMINATION AND PETROGENESIS	SL781	BASALT	-20	30	2870	0.998254	52.86	0.53	10.49	10.16	0.15	13.12	9.49	2.47	0	0.06	108
Belingwe	GEOCHEMISTRY OF THE IGNEOUS ROCKS OF THE BELINGWE GREENSTONE BELT: ALTERATION, CONTAMINATION AND PETROGENESIS	SL702	BASALT	-20	30	2870	0.996252	50.9	0.87	13.04	12.01	0.2	10.59	8.66	2.94	0.11	0.09	101
Belingwe	GEOCHEMISTRY OF THE IGNEOUS ROCKS OF THE BELINGWE GREENSTONE BELT: ALTERATION, CONTAMINATION AND PETROGENESIS	SL461	NOT-GIVEN	-20	30	2870	0.994507	51.32	1.12	14.77	12.05	0.18	6.87	11.69	1.58	0.07	0.11	94
Belingwe	GEOCHEMISTRY OF THE IGNEOUS ROCKS OF THE BELINGWE GREENSTONE BELT: ALTERATION, CONTAMINATION AND PETROGENESIS	SL734	BASALT	-20	30	2870	0.999703	53.58	0.78	14.2	10.92	0.17	8.26	10.59	1.7	0.12	0.07	92
Belingwe	GEOCHEMISTRY OF THE IGNEOUS ROCKS OF THE BELINGWE GREENSTONE BELT: ALTERATION, CONTAMINATION AND PETROGENESIS	SL498	BASALT	-20	30	2870	0.998543	50.15	1	14.93	11.98	0.19	7.73	10.58	2.49	0.05	0.1	83
Belingwe	GEOCHEMISTRY OF THE IGNEOUS ROCKS OF THE BELINGWE GREENSTONE BELT: ALTERATION, CONTAMINATION AND PETROGENESIS	SL714	BASALT	-20	30	2870	0.999497	49.46	1.29	10.14	12.73	0.22	9.65	12.76	0.96	1.26	0.11	81
Belingwe	GEOCHEMISTRY OF THE IGNEOUS ROCKS OF THE BELINGWE GREENSTONE BELT: ALTERATION, CONTAMINATION AND PETROGENESIS	SL737	BASALT	-20	30	2870	0.99893	53.56	0.79	14.25	10.98	0.17	8.17	10.98	1.46	0.1	0.07	81
Belingwe	GEOCHEMISTRY OF THE IGNEOUS ROCKS OF THE BELINGWE GREENSTONE BELT: ALTERATION, CONTAMINATION AND PETROGENESIS	SL736	BASALT	-20	30	2870	0.998102	52.82	0.79	14.23	10.8	0.16	8.21	9.89	2.18	0.04	0.07	71
Belingwe	GEOCHEMISTRY OF THE IGNEOUS ROCKS OF THE BELINGWE GREENSTONE BELT: ALTERATION, CONTAMINATION AND PETROGENESIS	SL403	BASALT	-20	30	2870	0.999692	51.3	0.82	14.83	11.92	0.18	7.78	11.93	1.16	0.09	0.08	70
Belingwe	GEOCHEMISTRY OF THE IGNEOUS ROCKS OF THE BELINGWE GREENSTONE BELT: ALTERATION, CONTAMINATION AND PETROGENESIS	SL782	BASALT	-20	30	2870	0.999559	52.18	0.52	10.15	10.66	0.17	14.13	9.02	2.43	0	0.06	51
Belingwe	GEOCHEMISTRY OF THE IGNEOUS ROCKS OF THE BELINGWE GREENSTONE BELT: ALTERATION, CONTAMINATION AND PETROGENESIS	SL752	BASALT	-20	30	2870	0.999205	52.55	0.49	9.64	10.4	0.16	15.55	8.06	2.22	0	0.06	48
Belingwe	GEOCHEMISTRY OF THE IGNEOUS ROCKS OF THE BELINGWE GREENSTONE BELT: ALTERATION, CONTAMINATION AND PETROGENESIS	SL776	BASALT	-20	30	2870	0.999987	53.61	0.45	8.46	9.56	0.16	14.98	9.21	2.26	0	0.05	40
North Caribou terrane, Superior	MESO- AND NEOARCHEAN EVOLUTION OF THE ISLAND LAKE GREENSTONE BELT AND THE NORTHWESTERN SUPERIOR PROVINCE: EVIDENCE FROM LITHOGEOCHEMISTRY, ND ISOTOPE DATA, AND U-PB ZIRCON GEOCHRONOLOGY	52-IL-98-38	BASALT	53.9045	-94.7281	2852	0.911768	53.9821	0.6217	11.9412	9.78	0.2107	7.9231	12.229	1.9217	0.2466	0.0617	98
NW Tanzania	THE GEITA GOLD DEPOSIT IN NW TANZANIA - GEOLOGY, ORE PETROLOGY, GEOCHEMISTRY AND TIMING OF EVENTS	96202	BASALT	-2.83	32.08	2850	0.995705	50.6	1.12	13.95	13.22	0.26	6.04	8.92	3.06	0.27	0.08	131
Baltic Shield	EARLY MAGMATISM OF THE BELOMORIAN MOBILE BELT, BALTIC SHIELD: LATERAL ZONING AND ISOTOPIC AGE	311-9	BASALT	66.25	33.75	2835	0.993651	46.6	1.03	14.51	15.47	0.52	7.06	11.43	1.04	0.23		60
Baltic Shield	EARLY MAGMATISM OF THE BELOMORIAN MOBILE BELT, BALTIC SHIELD: LATERAL ZONING AND ISOTOPIC AGE	450-2	BASALT	66.25	33.75	2835	0.979246	48.8	0.98	15.14	14.02	0.14	7.05	8.54	2.81	0.28	0.1	30
Jharol Belt, India	GEOCHEMISTRY AND PETROGENESIS OF LATE ARCHAEAN ARAVALLI VOLCANICS, BASEMENT ENCLAVES AND GRANITOIDS, RAJASTHAN	BE.3	NOT-GIVEN	24.93	73.82	2830	0.99232	50.8	0.68	14.5	10.18	0.2	9.4	11.04	1.77	0.53	0.06	77
Northern Superior Province	CONSTRAINTS ON EARLY ARCHEAN CRUSTAL EXTRACTION AND THOLEIITIC-KOMATIITIC VOLCANISM IN GREENSTONE BELTS OF NORTHERN SUPERIOR PROVINCE	23	BASALT	60.8	-71	2820	0.996732	46.12	0.51	16.61	10.23	0.19	10	9.36	1.34	2.58	0.04	220
Northern Superior Province	CONSTRAINTS ON EARLY ARCHEAN CRUSTAL EXTRACTION AND THOLEIITIC-KOMATIITIC VOLCANISM IN GREENSTONE BELTS OF NORTHERN SUPERIOR PROVINCE	34	BASALT	60.8	-71	2820	0.97016	49.33	0.46	12.6	14.17	0.28	8.05	10.23	2.58	0.27	0.01	17
Karelian, Finland	GEOCHEMISTRY OF KOMATIITES FROM THE TIPASJÄRVI, KUHMO, SUOMUSSALMI, ILOMANTSI AND TULPPIO GREENSTONE BELTS, FINLAND: IMPLICATIONS FOR TECTONIC SETTING AND NI SULPHIDE PROSPECTIVITY	HJO-87-79.1	BASALT	62.7	30.9	2815	0.95133	50.2	0.5412	9.41	11.06	0.2024	13.7	7.615	2.65	0.402	0.1648	172
Karelian, Finland	GEOCHEMISTRY OF KOMATIITES FROM THE TIPASJÄRVI, KUHMO, SUOMUSSALMI, ILOMANTSI AND TULPPIO GREENSTONE BELTS, FINLAND: IMPLICATIONS FOR TECTONIC SETTING AND NI SULPHIDE PROSPECTIVITY	25-PTP-03	BASALT	64.27	29.05	2815	0.969899	51.1	0.367	14.8	6.25	0.155	11.2	10.93	2.16	0.981	0.018	157
Karelian, Finland	GEOCHEMISTRY OF KOMATIITES FROM THE TIPASJÄRVI, KUHMO, SUOMUSSALMI, ILOMANTSI AND TULPPIO GREENSTONE BELTS, FINLAND: IMPLICATIONS FOR TECTONIC SETTING AND NI SULPHIDE PROSPECTIVITY	12-PTP-03	BASALT	64.24	29.1	2815	0.916119	45.3	0.54	10.6	10.81	0.195	15.8	10.04	0.78	0.299	0.035	81.5
Karelian, Finland	GEOCHEMISTRY OF KOMATIITES FROM THE TIPASJÄRVI, KUHMO, SUOMUSSALMI, ILOMANTSI AND TULPPIO GREENSTONE BELTS, FINLAND: IMPLICATIONS FOR TECTONIC SETTING AND NI SULPHIDE PROSPECTIVITY	75-PTP-03	BASALT	65.2	29.1	2815	0.937338	49.8	0.72	16.1	7.77	0.146	9.8	7.51	2.86	0.053	0.05	39
Kaapvaal	FUNDAMENTAL UNIFORMITY IN THE TRACE ELEMENT PATTERNS OF THE VOLCANICS OF THE KAAPVAAL CRATON FROM 3000 TO 2100 MA: EVIDENCE FOR THE LITHOSPHERIC ORIGIN OF THESE CONTINENTAL THOLEIITES	DB-93	basalt	-25.87	24.73	2800	0.976121	51.7	0.76	13.06	11.12	0.18	9.15	9.54	2.5	0.57	0.17	223
Dharwar, SOUTHERN INDIA	AN ARCHAEAN TECTONIC MODEL OF THE DHARWAR CRATON, SOUTHERN INDIA: THE ORIGIN OF THE HOLENARASIPUR GREENSTONE BELT (HUSSAN DISTRICT, KARNATAKA) AND REINTERPRETATION OF THE SARGUR-DHARWAR RELATIONSHIP	69	BASALT	12.77	76.23	2800	0.999355	50.5	1.19	14.6	12.63	0.203	6.93	9.39	2.86	0.26	0.082	27
Uchi-Confederation, Canada	THE GEOCHEMISTRY OF REPETITIVE CYCLICAL VOLCANISM FROM BASALT THROUGH RHYOLITE IN THE UCHI-CONFEDERATION GREENSTONE BELT, CANADA	407	BASALT	51.1	-92.82	2794	0.944987	49.4	1.07	15.7	12.2	0.22	8.3	11.7	1.15	0	0.05	30
Yilgarn	LONG-LIVED, AUTOCHTHONOUS DEVELOPMENT OF THE ARCHEAN MURCHISON DOMAIN, AND IMPLICATIONS FOR YILGARN CRATON TECTONICS	81449	BASALT	-26.5	118.3	2792	0.997417	50	0.4	10.8	8.39	0.19	14.9	9.21	1.15	0.06	0.08	49
Tipasjärvi-Kuhmo-Suomussalmi, Finland	ARCHEAN EVOLUTION OF THE TIPASJÄRVI-KUHMO-SUOMUSSALMI GREENSTONE COMPLEX, FINLAND	4SII 93-1/60.4	BASALT	64.244	29.0751	2788	0.979291	45	0.739	13.1	13	0.22	12.5	7.56	1.89	0.143	0.046	62.7
Karelian, Finland	KALIKORVA STRUCTURE AND ITS POSITION IN THE SYSTEM OF THE NORTHERN KARELIAN GREENSTONE BELTS: GEOCHEMICAL AND GEOCHRONOLOGICAL DATA	60/1	BASALT	66.78	32	2785	0.999806	48.33	0.75	13.09	11.26	0.24	11.19	11.26	1.3	1.08	0.24	567
Karelian, Finland	KALIKORVA STRUCTURE AND ITS POSITION IN THE SYSTEM OF THE NORTHERN KARELIAN GREENSTONE BELTS: GEOCHEMICAL AND GEOCHRONOLOGICAL DATA	35/12B	BASALT	66.78	32	2785	0.999769	46.21	0.75	11.7	11.37	0.22	15.97	10.6	1.09	0.62	0.2	153
Karelian, Finland	KALIKORVA STRUCTURE AND ITS POSITION IN THE SYSTEM OF THE NORTHERN KARELIAN GREENSTONE BELTS: GEOCHEMICAL AND GEOCHRONOLOGICAL DATA	35/12A	BASALT	66.78	32	2785	0.959567	45.9	0.74	12.2	11.11	0.22	11.63	14.62	1.25	0.89	0.2	149
Northern Karelia, Finland	HIGH-MG, LOW-TI QUARTZ AMPHIBOLITES OF GREENSTONE BELTS FROM NORTHERN KARELIA - METAMORPHOSED ARCHEAN ANALOGUES OF BONINITES?	N-333	BASALT	66.25	33.75	2778	0.977729	47.13	0.41	10.08	11.64	0.18	16.59	10.48	0.49	0.06	0.05	8.77
Superior	GEOCHEMISTRY OF BONINITE-TYPE VOLCANIC ROCKS IN THE FROTET-EVANS GREENSTONE BELT, OPATICA SUBPROVINCE, QUEBEC: IMPLICATIONS FOR THE EVOLUTION OF ARCHEAN GREENSTONE BELTS	85-16786	ANDESITE	51	-74	2774	0.999827	53.9	0.57	16.1	6.66	0.1	7.6	9.1	1.8	0.9	0.07	179
Superior	GEOCHEMISTRY OF BONINITE-TYPE VOLCANIC ROCKS IN THE FROTET-EVANS GREENSTONE BELT, OPATICA SUBPROVINCE, QUEBEC: IMPLICATIONS FOR THE EVOLUTION OF ARCHEAN GREENSTONE BELTS	85-16787	BASALT	51	-74	2774	0.999622	51.3	0.43	15.5	7.65	0.2	9.3	9.7	1.6	1.2	0.05	158
Superior	GEOCHEMISTRY OF BONINITE-TYPE VOLCANIC ROCKS IN THE FROTET-EVANS GREENSTONE BELT, OPATICA SUBPROVINCE, QUEBEC: IMPLICATIONS FOR THE EVOLUTION OF ARCHEAN GREENSTONE BELTS	135587IC	BASALT	51	-74	2774	0.977552	49.5	0.37	13.7	10.2	0.2	13	6.1	1.5	0.8	0.1	63
Superior	GEOCHEMISTRY OF BONINITE-TYPE VOLCANIC ROCKS IN THE FROTET-EVANS GREENSTONE BELT, OPATICA SUBPROVINCE, QUEBEC: IMPLICATIONS FOR THE EVOLUTION OF ARCHEAN GREENSTONE BELTS	133731IC	BASALT	51	-74	2774	0.949731	49	0.44	14.5	8.6	0.2	7	10.7	1.8	0.3	0.09	39
Superior	GEOCHEMISTRY OF BONINITE-TYPE VOLCANIC ROCKS IN THE FROTET-EVANS GREENSTONE BELT, OPATICA SUBPROVINCE, QUEBEC: IMPLICATIONS FOR THE EVOLUTION OF ARCHEAN GREENSTONE BELTS	92-6532	THOLEIITE	51	-74	2774	0.997307	46.6	0.62	15.3	9.81	0.2	10.5	11.1	0.2	1.5	0.05	38
Superior	GEOCHEMISTRY OF BONINITE-TYPE VOLCANIC ROCKS IN THE FROTET-EVANS GREENSTONE BELT, OPATICA SUBPROVINCE, QUEBEC: IMPLICATIONS FOR THE EVOLUTION OF ARCHEAN GREENSTONE BELTS	94-1359	THOLEIITE	51	-74	2774	0.995178	48.4	0.6	14	8.91	0.2	11.8	8.8	0.2	1.7	0	32
Superior	GEOCHEMISTRY OF BONINITE-TYPE VOLCANIC ROCKS IN THE FROTET-EVANS GREENSTONE BELT, OPATICA SUBPROVINCE, QUEBEC: IMPLICATIONS FOR THE EVOLUTION OF ARCHEAN GREENSTONE BELTS	93-12559	ANDESITE	51	-74	2774	0.955459	53.1	0.42	14.4	7.38	0.2	9.8	11.1	1.7	0.1	0.02	32
Superior	GEOCHEMISTRY OF BONINITE-TYPE VOLCANIC ROCKS IN THE FROTET-EVANS GREENSTONE BELT, OPATICA SUBPROVINCE, QUEBEC: IMPLICATIONS FOR THE EVOLUTION OF ARCHEAN GREENSTONE BELTS	135643IC	ANDESITE	51	-74	2774	0.995293	52.2	0.36	13.7	10.6	0.2	9.3	9.7	1.7	0.1	0.01	20
Superior	GEOCHEMISTRY OF BONINITE-TYPE VOLCANIC ROCKS IN THE FROTET-EVANS GREENSTONE BELT, OPATICA SUBPROVINCE, QUEBEC: IMPLICATIONS FOR THE EVOLUTION OF ARCHEAN GREENSTONE BELTS	135685IC	BASALT	51	-74	2774	0.995637	51.3	0.37	13.6	9.7	0.2	11.3	8.2	1.9	0.1	0.01	16
Tipasjärvi-Kuhmo-Suomussalmi, Finland	ARCHEAN EVOLUTION OF THE TIPASJÄRVI-KUHMO-SUOMUSSALMI GREENSTONE COMPLEX, FINLAND	174TOH 93-1	BASALT	64.2389	29.087	2770	0.965338	51.1	0.68	14.5	9.97	0.231	8.6	11.77	2.23	0.23	0.044	53
Tipasjärvi-Kuhmo-Suomussalmi, Finland	ARCHEAN EVOLUTION OF THE TIPASJÄRVI-KUHMO-SUOMUSSALMI GREENSTONE COMPLEX, FINLAND	63TTT 96-2	basalt	64.2922	29.0694	2770	0.993318	50.13	0.03	0.8	11.49	0.511	13.81	20.61	0.04	0.01	0.004	37
Tipasjärvi-Kuhmo-Suomussalmi, Finland	ARCHEAN EVOLUTION OF THE TIPASJÄRVI-KUHMO-SUOMUSSALMI GREENSTONE COMPLEX, FINLAND	2ARO 93-2/225.00	BASALT	64.4465	29.0465	2770	0.975936	49.39	0.68	14.13	12.27	0.334	6.08	8.29	1.94	0.16	0.038	31
Tipasjärvi-Kuhmo-Suomussalmi, Finland	ARCHEAN EVOLUTION OF THE TIPASJÄRVI-KUHMO-SUOMUSSALMI GREENSTONE COMPLEX, FINLAND	195TOH 93-1	BASALT	64.2465	29.0605	2770	0.943734	47.8	0.51	10.23	11.09	0.245	13.59	11.64	0.96	0.13	0.032	17
Tipasjärvi-Kuhmo-Suomussalmi, Finland	ARCHEAN EVOLUTION OF THE TIPASJÄRVI-KUHMO-SUOMUSSALMI GREENSTONE COMPLEX, FINLAND	5-HP-92	BASALT	64.2324	29.0853	2748	0.96267	49.49	0.77	15.73	11.28	0.22	7.28	12.83	1.16	0.15	0.05	23
Dharwar Craton	PETROGENESIS AND SOURCE CHARACTERISTICS OF METATHOLEIITES FROM THE ARCHEAN RAMAGIRI SCHIST BELT, EASTERN PART OF DHARWAR CRATON, INDIA	C53	THOLEIITE	14.25	77.55	2746	0.999446	52.77	0.53	10.79	11.94	0.2	11.41	9.61	2.52	0		181
Dharwar Craton	PETROGENESIS AND SOURCE CHARACTERISTICS OF METATHOLEIITES FROM THE ARCHEAN RAMAGIRI SCHIST BELT, EASTERN PART OF DHARWAR CRATON, INDIA	Z26	THOLEIITE	14.25	77.55	2746	0.998679	52.27	1.25	13.89	13.82	0.22	6.08	9.61	1.36	0.97		144
Dharwar Craton	PETROGENESIS AND SOURCE CHARACTERISTICS OF METATHOLEIITES FROM THE ARCHEAN RAMAGIRI SCHIST BELT, EASTERN PART OF DHARWAR CRATON, INDIA	Z39	THOLEIITE	14.25	77.55	2746	0.999106	53.27	0.99	13.52	12.5	0.19	6.56	10.15	2.14	0.6		139
Dharwar Craton	PETROGENESIS AND SOURCE CHARACTERISTICS OF METATHOLEIITES FROM THE ARCHEAN RAMAGIRI SCHIST BELT, EASTERN PART OF DHARWAR CRATON, INDIA	C6	THOLEIITE	14.25	77.55	2746	0.999889	51.5	0.86	16.79	10.74	0.14	8.89	8.02	2.58	0.35		130
Dharwar Craton	PETROGENESIS AND SOURCE CHARACTERISTICS OF METATHOLEIITES FROM THE ARCHEAN RAMAGIRI SCHIST BELT, EASTERN PART OF DHARWAR CRATON, INDIA	W50	THOLEIITE	14.25	77.5	2746	0.999517	50.25	0.71	15.76	11.5	0.18	8.92	9.31	2.63	0.03		66
Dharwar Craton	PETROGENESIS AND SOURCE CHARACTERISTICS OF METATHOLEIITES FROM THE ARCHEAN RAMAGIRI SCHIST BELT, EASTERN PART OF DHARWAR CRATON, INDIA	Z50	THOLEIITE	14.25	77.55	2746	0.999342	47.2	0.67	14.8	10.8	0.17	8.38	8.74	2.47	0.03		66
Dharwar Craton	PETROGENESIS AND SOURCE CHARACTERISTICS OF METATHOLEIITES FROM THE ARCHEAN RAMAGIRI SCHIST BELT, EASTERN PART OF DHARWAR CRATON, INDIA	E36	THOLEIITE	14.25	77.55	2746	0.977218	50.61	0.97	14.77	12.19	0.22	6.47	11.78	2.59	0.3		64
Dharwar Craton	PETROGENESIS AND SOURCE CHARACTERISTICS OF METATHOLEIITES FROM THE ARCHEAN RAMAGIRI SCHIST BELT, EASTERN PART OF DHARWAR CRATON, INDIA	C30	THOLEIITE	14.25	77.55	2746	0.999527	48.11	0.52	16.74	12.08	0.15	12.63	6.89	2.54	0.16		62
Dharwar	GEOCHEMICAL SYSTEMATICS OF THOLEIITIC BASALTS FROM THE 2.7 GA RAMAGIRI-HUNGUND COMPOSITE GREENSTONE BELT, DHARWAR CRATON	P24	BASALT	14.75	77.25	2746	0.954087	49.9	0.64	13.22	11.07	0.2	10.08	10.45	2.44	0.18	0.05	55
Eastern Dharwar	SIGNIFICANCE OF THE ARCHEAN BIMODAL VOLCANICS FROM THE RAMNAGIRI SCHIST BELT IN THE FORMATION OF EASTERN DHARWAR CRATON	RM#72	BASALT	14.25	77.55	2746	0.999944	47.4	2.08	12.7	18	0.13	6.64	6.21	2.67	0.48	0.38	55
Dharwar Craton	PETROGENESIS AND SOURCE CHARACTERISTICS OF METATHOLEIITES FROM THE ARCHEAN RAMAGIRI SCHIST BELT, EASTERN PART OF DHARWAR CRATON, INDIA	W47	THOLEIITE	14.25	77.5	2746	0.997388	49.9	0.85	15.88	12.31	0.22	6.43	12.31	1.43	0.04		54
Dharwar Craton	PETROGENESIS AND SOURCE CHARACTERISTICS OF METATHOLEIITES FROM THE ARCHEAN RAMAGIRI SCHIST BELT, EASTERN PART OF DHARWAR CRATON, INDIA	C29	THOLEIITE	14.25	77.55	2746	0.986045	53.68	0.94	14.6	11.46	0.17	8.01	10.18	1.04	0.28		45
Dharwar Craton	PETROGENESIS AND SOURCE CHARACTERISTICS OF METATHOLEIITES FROM THE ARCHEAN RAMAGIRI SCHIST BELT, EASTERN PART OF DHARWAR CRATON, INDIA	W32	THOLEIITE	14.25	77.5	2746	0.990837	50.04	0.96	14.9	12.46	0.21	7.05	12.04	2.02	0.18		45
Eastern Dharwar	GEOCHEMISTRY OF THE NEO-ARCHAEAN HIGH-MG BASALTS, BONINITES AND ADAKITES FROM THE KUSHTAGI-HUNGUND GREENSTONE BELT OF THE EASTERN DHARWAR CRATON (EDC); IMPLICATIONS FOR THE TECTONIC SETTING	RIH-19	BASALT	15.8975	76.0181	2746	0.950415	51.47	0.45	14.1	9.48	0.17	10.96	10.63	1.31	0.08	0.03	42.37
Dharwar Craton	PETROGENESIS AND SOURCE CHARACTERISTICS OF METATHOLEIITES FROM THE ARCHEAN RAMAGIRI SCHIST BELT, EASTERN PART OF DHARWAR CRATON, INDIA	Z37	THOLEIITE	14.25	77.55	2746	0.996375	51.05	0.86	15.02	12.57	0.19	8.06	9.01	1.85	0.13		41
Dharwar Craton	PETROGENESIS AND SOURCE CHARACTERISTICS OF METATHOLEIITES FROM THE ARCHEAN RAMAGIRI SCHIST BELT, EASTERN PART OF DHARWAR CRATON, INDIA	E24	THOLEIITE	14.25	77.55	2746	0.996692	49.7	0.96	15.5	12.3	0.21	7.34	11.47	2.22	0.2		41
Dharwar Craton	PETROGENESIS AND SOURCE CHARACTERISTICS OF METATHOLEIITES FROM THE ARCHEAN RAMAGIRI SCHIST BELT, EASTERN PART OF DHARWAR CRATON, INDIA	W11	THOLEIITE	14.25	77.5	2746	0.999309	50.72	0.81	15.75	10.71	0.17	6.42	13.76	1.33	0.08		41
Dharwar Craton	PETROGENESIS AND SOURCE CHARACTERISTICS OF METATHOLEIITES FROM THE ARCHEAN RAMAGIRI SCHIST BELT, EASTERN PART OF DHARWAR CRATON, INDIA	E40	THOLEIITE	14.25	77.55	2746	0.996044	52.46	0.7	15.06	9.98	0.17	8.06	11.56	1.85	0.1		39
Dharwar Craton	PETROGENESIS AND SOURCE CHARACTERISTICS OF METATHOLEIITES FROM THE ARCHEAN RAMAGIRI SCHIST BELT, EASTERN PART OF DHARWAR CRATON, INDIA	W17-2	THOLEIITE	14.25	77.5	2746	0.999788	51.44	0.89	14.82	12.17	0.2	8.01	10.51	1.63	0.1		39
Dharwar Craton	PETROGENESIS AND SOURCE CHARACTERISTICS OF METATHOLEIITES FROM THE ARCHEAN RAMAGIRI SCHIST BELT, EASTERN PART OF DHARWAR CRATON, INDIA	42	THOLEIITE	14.25	77.55	2746	0.998068	53.13	0.64	15.04	9.21	0.16	8.2	11.73	1.75	0.09		37
Dharwar Craton	PETROGENESIS AND SOURCE CHARACTERISTICS OF METATHOLEIITES FROM THE ARCHEAN RAMAGIRI SCHIST BELT, EASTERN PART OF DHARWAR CRATON, INDIA	W1	THOLEIITE	14.25	77.5	2746	0.996455	49.7	1.01	15.28	12.11	0.2	7.31	9.87	2.69	0.06		36
Dharwar Craton	PETROGENESIS AND SOURCE CHARACTERISTICS OF METATHOLEIITES FROM THE ARCHEAN RAMAGIRI SCHIST BELT, EASTERN PART OF DHARWAR CRATON, INDIA	W52	THOLEIITE	14.25	77.5	2746	0.990886	49.33	0.92	15.71	12.22	0.21	6.26	13.3	1.84	0.14		36
Dharwar Craton	PETROGENESIS AND SOURCE CHARACTERISTICS OF METATHOLEIITES FROM THE ARCHEAN RAMAGIRI SCHIST BELT, EASTERN PART OF DHARWAR CRATON, INDIA	W16	THOLEIITE	14.25	77.5	2746	0.976397	49.6	0.97	15.65	12.56	0.21	8.63	9.17	2.68	0.12		35
Dharwar Craton	PETROGENESIS AND SOURCE CHARACTERISTICS OF METATHOLEIITES FROM THE ARCHEAN RAMAGIRI SCHIST BELT, EASTERN PART OF DHARWAR CRATON, INDIA	W51	THOLEIITE	14.25	77.5	2746	0.997691	50.88	0.74	15.86	12.26	0.2	7.8	9.01	3.06	0.1		35
Dharwar Craton	PETROGENESIS AND SOURCE CHARACTERISTICS OF METATHOLEIITES FROM THE ARCHEAN RAMAGIRI SCHIST BELT, EASTERN PART OF DHARWAR CRATON, INDIA	17-1	THOLEIITE	14.25	77.5	2746	0.988244	50.63	0.83	15.82	11.86	0.2	7.6	10.71	1.89	0.12		31
Dharwar	GEOCHEMICAL SYSTEMATICS OF THOLEIITIC BASALTS FROM THE 2.7 GA RAMAGIRI-HUNGUND COMPOSITE GREENSTONE BELT, DHARWAR CRATON	P31	BASALT	14.75	77.25	2746	0.948955	50.54	0.6	12.93	10.49	0.18	8.71	12.97	1.63	0.22	0.05	28
Dharwar Craton	PETROGENESIS AND SOURCE CHARACTERISTICS OF METATHOLEIITES FROM THE ARCHEAN RAMAGIRI SCHIST BELT, EASTERN PART OF DHARWAR CRATON, INDIA	E43	THOLEIITE	14.25	77.55	2746	0.994628	52.61	0.67	14.99	9.77	0.17	8.35	11.42	1.82	0.1		26
Dharwar Craton	PETROGENESIS AND SOURCE CHARACTERISTICS OF METATHOLEIITES FROM THE ARCHEAN RAMAGIRI SCHIST BELT, EASTERN PART OF DHARWAR CRATON, INDIA	W25	THOLEIITE	14.25	77.5	2746	0.996704	51.97	0.92	15.16	11.97	0.19	7.47	9.77	2.12	0.07		26
Dharwar	GEOCHEMICAL SYSTEMATICS OF THOLEIITIC BASALTS FROM THE 2.7 GA RAMAGIRI-HUNGUND COMPOSITE GREENSTONE BELT, DHARWAR CRATON	P33	BASALT	14.75	77.25	2746	0.944505	50.71	0.64	13.41	10.04	0.17	8.86	11.74	2	0.13	0.05	24
Dharwar Craton	PETROGENESIS AND SOURCE CHARACTERISTICS OF METATHOLEIITES FROM THE ARCHEAN RAMAGIRI SCHIST BELT, EASTERN PART OF DHARWAR CRATON, INDIA	W49	THOLEIITE	14.25	77.5	2746	0.998908	50.11	0.9	16.25	12.24	0.21	7.25	11.39	1.33	0		20
Dharwar Craton	PETROGENESIS AND SOURCE CHARACTERISTICS OF METATHOLEIITES FROM THE ARCHEAN RAMAGIRI SCHIST BELT, EASTERN PART OF DHARWAR CRATON, INDIA	Z49	THOLEIITE	14.25	77.55	2746	0.999097	47.5	0.85	15.4	11.6	0.2	6.87	10.8	1.26	0		20
Dharwar Craton	PETROGENESIS AND SOURCE CHARACTERISTICS OF METATHOLEIITES FROM THE ARCHEAN RAMAGIRI SCHIST BELT, EASTERN PART OF DHARWAR CRATON, INDIA	W46	THOLEIITE	14.25	77.5	2746	0.987361	48.67	0.84	15.62	12.08	0.21	8.15	10.49	1.98	0		14
Dharwar Craton	PETROGENESIS AND SOURCE CHARACTERISTICS OF METATHOLEIITES FROM THE ARCHEAN RAMAGIRI SCHIST BELT, EASTERN PART OF DHARWAR CRATON, INDIA	W22	THOLEIITE	14.25	77.5	2746	0.997857	49.95	0.86	15.49	11.7	0.2	7.81	12.61	1.07	0.02		14
Tipasjärvi-Kuhmo-Suomussalmi, Finland	ARCHEAN EVOLUTION OF THE TIPASJÄRVI-KUHMO-SUOMUSSALMI GREENSTONE COMPLEX, FINLAND	44.1	BASALT	64.2836	29.0756	2745	0.976289	47.7	0.51	9.3	16.83	0.33	11.1	9.8	0.88	1.44	0.03	244
Tipasjärvi-Kuhmo-Suomussalmi, Finland	ARCHEAN EVOLUTION OF THE TIPASJÄRVI-KUHMO-SUOMUSSALMI GREENSTONE COMPLEX, FINLAND	57.1	BASALT	64.3083	29.0921	2745	0.965432	51.7	1.38	14.4	12.14	0.21	7.34	9.26	1.86	0.22	0.13	2
Superior	TRACE ELEMENT GEOCHEMISTRY OF THE MEEN-DEMPSTER GREENSTONE BELT, UCHI SUBPROVINCE, SUPERIOR PROVINCE, CANADA: BACK-ARC DEVELOPMENT ON THE MARGINS OF AN ARCHEAN PROTOCONTINENT	82GRS-0292	THOLEIITE	51	-91	2742	0.990648	48.27	0.95	15.07	11.92	0.19	8.44	11.92	1.62	0.24	0.05	101
Superior	TRACE ELEMENT GEOCHEMISTRY OF THE MEEN-DEMPSTER GREENSTONE BELT, UCHI SUBPROVINCE, SUPERIOR PROVINCE, CANADA: BACK-ARC DEVELOPMENT ON THE MARGINS OF AN ARCHEAN PROTOCONTINENT	84GRS-0032	THOLEIITE	51	-91	2742	0.931072	49.95	1.78	14.78	13.68	0.23	6.33	7.66	3.82	0.12	0.11	86
Superior	TRACE ELEMENT GEOCHEMISTRY OF THE MEEN-DEMPSTER GREENSTONE BELT, UCHI SUBPROVINCE, SUPERIOR PROVINCE, CANADA: BACK-ARC DEVELOPMENT ON THE MARGINS OF AN ARCHEAN PROTOCONTINENT	82GRS-0088	THOLEIITE	51	-91	2742	0.994262	50.81	0.84	14.3	11.5	0.19	6.98	12.17	1.62	0.21	0.1	72
Superior	BASIC LAVAS OF THE ARCHEAN LA GRANDE GREENSTONE BELT: PRODUCTS OF POLYBARIC FRACTIONATION AND CRUSTAL CONTAMINATION	285C	ANDESITE	53.75	-75.5	2741.5	0.95542	49.79	0.4	9.39	8.81	0.18	15.43	10.34	1.49	0.54	0.09	180
Superior	BASIC LAVAS OF THE ARCHEAN LA GRANDE GREENSTONE BELT: PRODUCTS OF POLYBARIC FRACTIONATION AND CRUSTAL CONTAMINATION	18A	THOLEIITE	53.75	-75.5	2741.5	0.98706	51.83	1.05	15.02	11.1	0.23	6.83	9.46	1.81	0.16	0.06	86
Superior	BASIC LAVAS OF THE ARCHEAN LA GRANDE GREENSTONE BELT: PRODUCTS OF POLYBARIC FRACTIONATION AND CRUSTAL CONTAMINATION	216	THOLEIITE	53.75	-75.5	2741.5	0.998145	48.47	0.83	16.51	10.85	0.2	7.61	9.4	2.23	0.02	0.06	41
Superior	GEOCHEMISTRY AND AGE OF TIMISKAMING ALKALI VOLCANICS AND THE OTTO SYENITE STOCK, ABITIBI, ONTARIO	AA21505	BASALT	48	-80	2740	0.999843	52.97	1	13.4	8.2		7	9.22	3	3.43		1800
Superior	NEOARCHEAN EVOLUTION OF DIFFERING CONVERGENT MARGIN ASSEMBLAGES IN THE WABIGOON SUBPROVINCE: GEOCHEMICAL AND GEOCHRONOLOGICAL EVIDENCE FROM THE LAKE OF THE WOODS GREENSTONE BELTS, SUPERIOR PROVINCE, NORTHWESTERN CANADA	85S-336	basalt	49.2	-94.6	2738	0.986964	47.5	0.57	15.6	9.94	0.17	8.45	9.86	2.89	0.02	0.01	90
Superior	NEOARCHEAN EVOLUTION OF DIFFERING CONVERGENT MARGIN ASSEMBLAGES IN THE WABIGOON SUBPROVINCE: GEOCHEMICAL AND GEOCHRONOLOGICAL EVIDENCE FROM THE LAKE OF THE WOODS GREENSTONE BELTS, SUPERIOR PROVINCE, NORTHWESTERN CANADA	85S-113	basalt	49.2	-94.6	2738	0.997787	47.6	0.46	10.6	10.22	0.19	13.8	11.9	0.83	0	0.03	50
Uchi-Confederation, Canada	THE GEOCHEMISTRY OF REPETITIVE CYCLICAL VOLCANISM FROM BASALT THROUGH RHYOLITE IN THE UCHI-CONFEDERATION GREENSTONE BELT, CANADA	462	BASALT	51.12	-92.63	2737	0.963083	47.1	0.9	17.6	11.6	0.19	9.68	9.6	2.98	0.03	0.02	80
Uchi-Confederation, Canada	THE GEOCHEMISTRY OF REPETITIVE CYCLICAL VOLCANISM FROM BASALT THROUGH RHYOLITE IN THE UCHI-CONFEDERATION GREENSTONE BELT, CANADA	461	BASALT	51.1	-92.63	2737	0.962269	48.9	0.8	17	10	0.17	8.91	10.9	3.07	0	0.02	50
Pilbara	THE OLDEST CONTINENTAL AND OCEANIC PLATEAUS: GEOCHEMISTRY OF BASALTS AND KOMATIITES OF THE PILBARA CRATON, AUSTRALIA	96983R	BASALT	-21	117.5	2735	0.999663	53.88	0.63	16.76	10.83	0.16	7.31	5.99	3.95	0.38	0.1	3575
Pilbara	THE OLDEST CONTINENTAL AND OCEANIC PLATEAUS: GEOCHEMISTRY OF BASALTS AND KOMATIITES OF THE PILBARA CRATON, AUSTRALIA	96919R	BASALT	-21	117.5	2735	0.96364	53.28	0.66	16.69	10.25	0.16	6.54	8.38	3.88	0.04	0.12	1680
Pilbara	THE OLDEST CONTINENTAL AND OCEANIC PLATEAUS: GEOCHEMISTRY OF BASALTS AND KOMATIITES OF THE PILBARA CRATON, AUSTRALIA	96985R	BASALT	-21	117.5	2735	0.993457	53.6	0.58	16.1	10.41	0.16	7.74	8.59	2.64	0.15	0.08	947
Pilbara	THE OLDEST CONTINENTAL AND OCEANIC PLATEAUS: GEOCHEMISTRY OF BASALTS AND KOMATIITES OF THE PILBARA CRATON, AUSTRALIA	96984R	BASALT	-21	117.5	2735	0.996833	53.01	0.59	16.23	10.32	0.15	8.15	9.04	2.35	0.07	0.09	916
Pilbara	THE OLDEST CONTINENTAL AND OCEANIC PLATEAUS: GEOCHEMISTRY OF BASALTS AND KOMATIITES OF THE PILBARA CRATON, AUSTRALIA	96921R	BASALT	-21	117.5	2735	0.991313	49.92	1.72	15.57	17.02	0.17	6.11	5.3	3.69	0.35	0.15	787
Pilbara	THE OLDEST CONTINENTAL AND OCEANIC PLATEAUS: GEOCHEMISTRY OF BASALTS AND KOMATIITES OF THE PILBARA CRATON, AUSTRALIA	96922R	BASALT	-21	117.5	2735	0.949796	53.65	0.61	16.04	10	0.15	7.88	8.28	3.25	0.04	0.11	468
Pilbara	THE OLDEST CONTINENTAL AND OCEANIC PLATEAUS: GEOCHEMISTRY OF BASALTS AND KOMATIITES OF THE PILBARA CRATON, AUSTRALIA	105707	basalt	-22.925	117.384	2735	0.993043	53.49	0.78	9.48	12.4	0.18	16.08	6.86	0.37	0.22	0.13	118
Yilgarn	OCCURRENCE OF KOMATIITES IN THE SANDSTONE GREENSTONE BELT, NORTH-CENTRAL YILGARN CRATON	178344	BASALT	-27.5	119	2731	0.946573	48.09	0.51	9.42	9.69	0.18	16.69	8.71	1.18	0.09	0.06	108
Superior Province	KOMATIITE FLOODING OF A RIFTED ARCHEAN RHYOLITIC ARC COMPLEX: GEOCHEMICAL SIGNATURE AND TECTONIC SIGNIFICANCE OF THE STOUGHTON-ROQUEMAURE GROUP, ABITIBI GREENSTONE BELT, CANADA	WP-94-5	BASALT	48.5	-79.2	2725	0.980624	47.27	0.66	14.87	10.55	0.2	9.41	8.94	1.96	0.4	0.04	200
Superior	GEOCHEMISTRY AND ORIGIN OF ARCHEAN VOLCANIC ROCKS FROM THE UPPER KEEWATIN ASSEMBLAGE (CA. 2.7 GA), LAKE OF THE WOODS GREENSTONE BELT, WESTERN WABIGOON SUBPROVINCE, SUPERIOR PROVINCE, CANADA	K146	ANDESITE	49.2	-94.6	2723	0.959864	53.61	0.86	16.4	10.86	0.2	8.82	5.05	3.18	0.78	0.25	501
Superior	GEOCHEMISTRY AND ORIGIN OF ARCHEAN VOLCANIC ROCKS FROM THE UPPER KEEWATIN ASSEMBLAGE (CA. 2.7 GA), LAKE OF THE WOODS GREENSTONE BELT, WESTERN WABIGOON SUBPROVINCE, SUPERIOR PROVINCE, CANADA	K120	BASALT	49.2	-94.6	2723	0.989653	51.58	0.92	12.92	11.32	0.15	8.37	10.84	2.42	1.49		190
Superior	GEOCHEMISTRY AND ORIGIN OF ARCHEAN VOLCANIC ROCKS FROM THE UPPER KEEWATIN ASSEMBLAGE (CA. 2.7 GA), LAKE OF THE WOODS GREENSTONE BELT, WESTERN WABIGOON SUBPROVINCE, SUPERIOR PROVINCE, CANADA	K170	THOLEIITE	49.2	-94.6	2723	0.990998	50.34	0.58	12.71	11.06	0.18	11.39	11.79	1.56	0.26	0.13	125
Superior	GEOCHEMISTRY AND ORIGIN OF ARCHEAN VOLCANIC ROCKS FROM THE UPPER KEEWATIN ASSEMBLAGE (CA. 2.7 GA), LAKE OF THE WOODS GREENSTONE BELT, WESTERN WABIGOON SUBPROVINCE, SUPERIOR PROVINCE, CANADA	K153	THOLEIITE	49.2	-94.6	2723	0.981447	52.42	0.57	13.71	9.79	0.17	9.72	10.85	2.59	0.01	0.17	77
Superior	GEOCHEMISTRY AND ORIGIN OF ARCHEAN VOLCANIC ROCKS FROM THE UPPER KEEWATIN ASSEMBLAGE (CA. 2.7 GA), LAKE OF THE WOODS GREENSTONE BELT, WESTERN WABIGOON SUBPROVINCE, SUPERIOR PROVINCE, CANADA	K40	THOLEIITE	49.2	-94.6	2723	0.993098	50.87	0.51	12.72	11.75	0.17	11.66	10.59	1.48	0	0.25	74
Superior	GEOCHEMISTRY AND ORIGIN OF ARCHEAN VOLCANIC ROCKS FROM THE UPPER KEEWATIN ASSEMBLAGE (CA. 2.7 GA), LAKE OF THE WOODS GREENSTONE BELT, WESTERN WABIGOON SUBPROVINCE, SUPERIOR PROVINCE, CANADA	K159	THOLEIITE	49.2	-94.6	2723	0.99776	51.37	0.63	14.87	9.41	0.18	6.81	10.63	2.98	0.01	0.11	69
Superior	DECIPHERING AN ARCHEAN MANTLE PLUME: ABITIBI GREENSTONE BELT, CANADA	ROQ-1B	BASALT	48.2	-80	2723	0.976287	50.89	0.76	13.66	10.86	0.18	7.32	8.74	3.46	0.06	0.06	49
Superior	DECIPHERING AN ARCHEAN MANTLE PLUME: ABITIBI GREENSTONE BELT, CANADA	ROQ-8	BASALT	48.2	-80	2723	0.910109	49.87	0.73	13.48	10.69	0.17	8.14	10.67	2.8	0.03	0.05	32
Superior	DECIPHERING AN ARCHEAN MANTLE PLUME: ABITIBI GREENSTONE BELT, CANADA	ROQ-8B	BASALT	48.2	-80	2723	0.99465	49.85	0.74	13.77	10.62	0.17	7.83	10.77	2.87	0.03	0.06	27
Yilgarn	LONG-LIVED, AUTOCHTHONOUS DEVELOPMENT OF THE ARCHEAN MURCHISON DOMAIN, AND IMPLICATIONS FOR YILGARN CRATON TECTONICS	190540	BASALT	-26.5	118.3	2722.5	0.999887	53.387	0.626	15.097	7.46	0.145	6.794	10.82	2.548	0.486	0.101	260
Yilgarn	LONG-LIVED, AUTOCHTHONOUS DEVELOPMENT OF THE ARCHEAN MURCHISON DOMAIN, AND IMPLICATIONS FOR YILGARN CRATON TECTONICS	190507	BASALT	-26.5	118.3	2722.5	0.907314	51.993	0.615	14.351	9.81	0.179	6.684	10.278	1.849	0.304	0.101	193
Superior	THE GEOCHEMISTRY OF KOMATIITES AND BASALTS FROM THE DEADMAN HILL AREA, MUNRO TOWNSHIP, ONTARIO, CANADA	NFT5180	THOLEIITE	48.48	-81.33	2720	0.998678	49.56	1.55	12.79	15.67	0.28	6.37	8.19	2.86	2.28	0.13	509
Superior	THE GEOCHEMISTRY OF KOMATIITES AND BASALTS FROM THE DEADMAN HILL AREA, MUNRO TOWNSHIP, ONTARIO, CANADA	DC118	BASALT	48.48	-81.33	2720	0.995514	50.07	0.69	14.02	11.73	0.2	10.75	9.31	2.25	0.68	0.08	178
Superior	THE GEOCHEMISTRY OF KOMATIITES AND BASALTS FROM THE DEADMAN HILL AREA, MUNRO TOWNSHIP, ONTARIO, CANADA	DC108	BASALT	48.48	-81.33	2720	0.996166	51.65	0.65	13.44	10.11	0.17	10.08	10.95	1.84	0.8	0.09	168
Superior	THE GEOCHEMISTRY OF KOMATIITES AND BASALTS FROM THE DEADMAN HILL AREA, MUNRO TOWNSHIP, ONTARIO, CANADA	DC127	THOLEIITE	48.48	-81.33	2720	0.999778	51.97	0.69	14.69	10.25	0.18	8.26	9.66	3.11	0.97	0.08	147
Superior	GEOCHEMISTRY OF MUNRO TOWNSHIP BASALTS	P9-225	BASALT	48.2	-80.1	2720	0.999711	50.63	0.79	13.22	10.15	0.21	9.8	10.22	3.54	0.15	0.06	142
Superior	THE GEOCHEMISTRY OF KOMATIITES AND BASALTS FROM THE DEADMAN HILL AREA, MUNRO TOWNSHIP, ONTARIO, CANADA	DC117	THOLEIITE	48.48	-81.33	2720	0.951393	52.45	0.68	13.69	9.8	0.18	9.39	10.7	2.42	0.4	0.08	139
Superior	THE GEOCHEMISTRY OF KOMATIITES AND BASALTS FROM THE DEADMAN HILL AREA, MUNRO TOWNSHIP, ONTARIO, CANADA	NFT4119	THOLEIITE	48.48	-81.33	2720	0.993765	47.99	1.77	13.83	15.91	0.39	6.88	8.93	2.92	0.91	0.14	126
Superior	THE GEOCHEMISTRY OF KOMATIITES AND BASALTS FROM THE DEADMAN HILL AREA, MUNRO TOWNSHIP, ONTARIO, CANADA	DC120	THOLEIITE	48.48	-81.33	2720	0.995194	52.32	0.73	14.82	10.72	0.19	7.76	10.62	2.26	0.27	0.09	122
Superior	THE GEOCHEMISTRY OF KOMATIITES AND BASALTS FROM THE DEADMAN HILL AREA, MUNRO TOWNSHIP, ONTARIO, CANADA	DC129	BASALT	48.48	-81.33	2720	0.995633	52.11	0.63	13.4	10.76	0.16	10.91	8.82	2.47	0.44	0.07	121
Superior	GEOCHEMISTRY OF MUNRO TOWNSHIP BASALTS	P9-226	BASALT	48.2	-80.1	2720	0.995883	51.02	0.67	12.2	10.44	0.19	12.2	8.52	3.39	0.09	0.07	102
Superior	GEOCHEMISTRY OF MUNRO TOWNSHIP BASALTS	P9-172	BASALT	48.2	-80.1	2720	0.999385	51.42	0.59	12.15	11.74	0.19	11.27	9.13	1.53	0.45	0.06	98
Superior	THE GEOCHEMISTRY OF KOMATIITES AND BASALTS FROM THE DEADMAN HILL AREA, MUNRO TOWNSHIP, ONTARIO, CANADA	DC132	THOLEIITE	48.48	-81.33	2720	0.998228	53.37	0.77	14.49	11.05	0.2	7.07	7.61	4.84	0.25	0.1	91
Superior	THE GEOCHEMISTRY OF KOMATIITES AND BASALTS FROM THE DEADMAN HILL AREA, MUNRO TOWNSHIP, ONTARIO, CANADA	DC105	BASALT	48.48	-81.33	2720	0.991951	46.5	0.62	12.87	13.72	0.27	15.03	7.85	2.62	0.21	0.08	83
Superior	GEOCHEMISTRY OF MUNRO TOWNSHIP BASALTS	P9-109	BASALT	48.2	-80.1	2720	0.999712	51	0.68	13.16	11.52	0.21	9.85	10.1	1.37	0.69	0.06	82
Superior	GEOCHEMISTRY OF MUNRO TOWNSHIP BASALTS	P9-159	THOLEIITE	48.6	-80.5	2720	0.999132	50.05	1.48	13.32	14.7	0.18	6.44	7.62	4.1	0.32	0.14	73
Superior	GEOCHEMISTRY OF MUNRO TOWNSHIP BASALTS	P9-131	BASALT	48.2	-80.1	2720	0.993829	52.05	0.88	14.43	10.06	0.17	7.51	10.54	3.09	0.09	0.09	72
Superior	THE GEOCHEMISTRY OF KOMATIITES AND BASALTS FROM THE DEADMAN HILL AREA, MUNRO TOWNSHIP, ONTARIO, CANADA	DC101	BASALT	48.48	-81.33	2720	0.998637	49.89	0.61	12.74	11.03	0.23	12.11	9.82	3.16	0.12	0.08	66
Superior	THE GEOCHEMISTRY OF KOMATIITES AND BASALTS FROM THE DEADMAN HILL AREA, MUNRO TOWNSHIP, ONTARIO, CANADA	DC116	THOLEIITE	48.48	-81.33	2720	0.997084	52.75	0.7	14.79	10.02	0.14	8.64	10.18	2.27	0.23	0.08	54
Superior	GEOCHEMISTRY OF MUNRO TOWNSHIP BASALTS	P9-174	BASALT	48.2	-80.1	2720	0.996608	51.97	0.81	14.29	9.8	0.18	7.95	8.8	4.61	0.05	0.08	53
Superior	GEOCHEMISTRY OF MUNRO TOWNSHIP BASALTS	P9-153	BASALT	48.2	-80.1	2720	0.999482	49.88	0.6	11.94	11.72	0.19	12.06	10.41	1.8	0.15	0.05	45
Superior	GEOCHEMISTRY OF MUNRO TOWNSHIP BASALTS	P9-179	BASALT	48.2	-80.1	2720	0.99967	50.94	0.67	13.15	11.29	0.19	9.45	10.48	2.15	0.12	0.06	41
Superior	GEOCHEMISTRY OF MUNRO TOWNSHIP BASALTS	P9-180	BASALT	48.2	-80.1	2720	0.998407	50.77	0.75	13.94	12.6	0.23	7.28	9.43	3.56	0.09	0.07	41
Superior	THE GEOCHEMISTRY OF KOMATIITES AND BASALTS FROM THE DEADMAN HILL AREA, MUNRO TOWNSHIP, ONTARIO, CANADA	NFT5101	THOLEIITE	48.48	-81.33	2720	0.997102	49.18	1.18	14.95	13.39	0.3	7.29	8.95	3.03	1.32	0.14	40
Superior	GEOCHEMISTRY OF MUNRO TOWNSHIP BASALTS	P9-160	THOLEIITE	48.6	-80.5	2720	0.998754	51.17	1.12	9.61	11.42	0.18	10.25	11.88	3.18	0.05	0.1	38
Superior	THE GEOCHEMISTRY OF KOMATIITES AND BASALTS FROM THE DEADMAN HILL AREA, MUNRO TOWNSHIP, ONTARIO, CANADA	DC131	THOLEIITE	48.48	-81.33	2720	0.987594	50.17	1.48	12.41	15.3	0.27	7.13	8.82	3.9	0.07	0.13	36
Superior	THE GEOCHEMISTRY OF KOMATIITES AND BASALTS FROM THE DEADMAN HILL AREA, MUNRO TOWNSHIP, ONTARIO, CANADA	NFT5187	BASALT	48.48	-81.33	2720	0.999674	50.36	0.56	10.86	11.57	0.2	15.75	7.46	2.82	0.13	0.07	35
Superior	GEOCHEMISTRY OF MUNRO TOWNSHIP BASALTS	P9-183	BASALT	48.2	-80.1	2720	0.999162	51.2	0.72	14.03	11.81	0.2	8.57	9.99	1.83	0.16	0.06	34
Superior	GEOCHEMISTRY OF MUNRO TOWNSHIP BASALTS	P9-157	basalt	48.6	-80.5	2720	0.946607	50.61	1.36	11.82	14.09	0.2	8.1	8.15	4.07	0.09	0.13	32
Superior	GEOCHEMISTRY OF MUNRO TOWNSHIP BASALTS	P9-107	BASALT	48.2	-80.1	2720	0.999682	49.42	0.62	12.78	10.95	0.18	11.6	11.22	2.06	0.08	0.05	26
Superior	GEOCHEMISTRY OF MUNRO TOWNSHIP BASALTS	P9-167	BASALT	48.2	-80.1	2720	0.999764	49.18	0.59	11.98	12.15	0.23	14	8.72	1.42	0.12	0.05	25
Superior	GEOCHEMISTRY OF MUNRO TOWNSHIP BASALTS	P9-155	BASALT	48.2	-80.1	2720	0.999816	46.68	0.55	10.84	12.28	0.2	16.35	10.23	1.16	0.06	0.05	24
Superior	GEOCHEMISTRY OF MUNRO TOWNSHIP BASALTS	P9-178	BASALT	48.2	-80.1	2720	0.996806	50.14	0.66	13.09	11.51	0.19	10.44	10.26	2.05	0.04	0.06	24
Superior	GEOCHEMISTRY OF MUNRO TOWNSHIP BASALTS	P9-175	BASALT	48.2	-80.1	2720	0.995014	50.25	0.76	12.67	10.57	0.19	11.29	9.71	2.97	0.05	0.08	23
Superior	GEOCHEMISTRY OF MUNRO TOWNSHIP BASALTS	P9-186	BASALT	48.2	-80.1	2720	0.998444	50.97	0.63	13.26	11.33	0.2	10.27	9.96	2.01	0.06	0.05	23
Superior	GEOCHEMISTRY OF MUNRO TOWNSHIP BASALTS	P9-177	BASALT	48.2	-80.1	2720	0.988457	50.08	0.71	12.01	10.18	0.17	13.59	8.65	2.8	0.04	0.08	16
Superior	THE GEOCHEMISTRY OF KOMATIITES AND BASALTS FROM THE DEADMAN HILL AREA, MUNRO TOWNSHIP, ONTARIO, CANADA	DC106	BASALT	48.48	-81.33	2720	0.978424	50.03	0.57	8.7	13.51	0.27	15.07	9.27	2.3	0.04	0.06	14
Superior	GEOCHEMISTRY OF MUNRO TOWNSHIP BASALTS	P9-154	BASALT	48.2	-80.1	2720	0.999252	47.38	0.54	11.04	11.53	0.2	14.99	11.29	1.31	0.04	0.05	14
Superior	GEOCHEMISTRY OF MUNRO TOWNSHIP BASALTS	C501	BASALT	48.2	-80.1	2720	0.998215	50.04	0.58	11.78	12.07	0.2	13.25	9.12	1.16	0.06	0.05	14
Superior	GEOCHEMISTRY OF MUNRO TOWNSHIP BASALTS	P9-176	BASALT	48.2	-80.1	2720	0.994316	49.29	0.71	12.19	9.53	0.17	13.01	11.07	2.6	0.03	0.08	12
Superior	GEOCHEMISTRY OF MUNRO TOWNSHIP BASALTS	P9-223	BASALT	48.2	-80.1	2720	0.998245	50.13	0.42	8.39	10.6	0.24	14.71	13.57	0.31	0.03	0.04	11
Superior	THE GEOCHEMISTRY OF KOMATIITES AND BASALTS FROM THE DEADMAN HILL AREA, MUNRO TOWNSHIP, ONTARIO, CANADA	NFT4254	THOLEIITE	48.48	-81.33	2720	0.999528	50.95	1.49	11.99	14.72	0.27	7.26	9.23	3.58	0.06	0.14	10
Superior	THE CHARACTERISTICS AND ORIGIN OF THE BIG LAKE MAFIC-ULTRAMAFIC-HOSTED VOLCANOGENIC MASSIVE SULFIDE OCCURRENCE, MARATHON, ONTARIO, CANADA	39-K	BASALT	48.6	-86.1	2719	0.988342	47.1	1	6.45	12.81	0.27	16.72	9.42	0.32	2.15	0.07	622.7
Superior	THE CHARACTERISTICS AND ORIGIN OF THE BIG LAKE MAFIC-ULTRAMAFIC-HOSTED VOLCANOGENIC MASSIVE SULFIDE OCCURRENCE, MARATHON, ONTARIO, CANADA	626477	BASALT	48.6	-86.1	2719	0.999346	49.03	1.95	9.3	14.15	0.25	9.62	9.08	2.54	0.34	0.11	230
Superior	THE CHARACTERISTICS AND ORIGIN OF THE BIG LAKE MAFIC-ULTRAMAFIC-HOSTED VOLCANOGENIC MASSIVE SULFIDE OCCURRENCE, MARATHON, ONTARIO, CANADA	626192	BASALT	48.6	-86.1	2719	0.982124	48.47	0.76	13.88	11.94	0.22	8.23	10.11	1.92	0.94	0.05	120
Dharwar	GEOCHEMISTRY OF ARCHEAN BIMODAL VOLCANIC ROCKS OF THE SANDUR SUPRACRUSTAL BELT, DHARWAR CRATON, SOUTHERN INDIA	14	THOLEIITE	15	76.7	2719	0.955139	53.3	1.24	13.8	10.47	0.15	7.29	8.13	3.15	0.12	0.2	40
Superior	PÉTROLOGIE DES ROCHES VOLCANIQUES DU SILLON DE ROCHES VERTES ARCHÉENNES DE MATAGAMI - CHIBOUGAMU À L^OUEST DE CHAPAIS (ABITIBI EST, QUÉBEC). 2. LE GROUPE HAUTEMENT POTASSIQUE D^OPÉMISCA	6048D	BASALT	49.75	-74.5	2717	0.999539	50.29	0.75	16.57	9.07	0.13	7.83	10.78	2.99	1.38	0.21	695
Superior	PÉTROLOGIE DES ROCHES VOLCANIQUES DU SILLON DE ROCHES VERTES ARCHÉENNES DE MATAGAMI - CHIBOUGAMU À L^OUEST DE CHAPAIS (ABITIBI EST, QUÉBEC). 2. LE GROUPE HAUTEMENT POTASSIQUE D^OPÉMISCA	6062D	BASALT	49.75	-74.5	2717	0.999955	49.79	0.73	16.61	8.78	0.16	9.85	11.01	2.2	0.6	0.26	365
Kaapvaal Craton	PETROGENESIS OF LATE ARCHEAN FLOOD-TYPE BASIC LAVAS FROM THE KLIPRIVIERSBERG GROUP, VENTERSDORP SUPERGROUP, SOUTH AFRICA	KL-153	BASALT	-26.87	26.67	2714	0.998043	52.25	0.74	15.38	10.89	0.23	7.11	6.29	3.31	2.49	0.102	680
Kaapvaal Craton	PETROGENESIS OF LATE ARCHEAN FLOOD-TYPE BASIC LAVAS FROM THE KLIPRIVIERSBERG GROUP, VENTERSDORP SUPERGROUP, SOUTH AFRICA	KL-138	BASALT	-26.87	26.67	2714	0.983611	51.82	0.69	15.13	10.75	0.2	6.84	8.46	3.37	1.46	0.087	644
Kaapvaal Craton	PETROGENESIS OF LATE ARCHEAN FLOOD-TYPE BASIC LAVAS FROM THE KLIPRIVIERSBERG GROUP, VENTERSDORP SUPERGROUP, SOUTH AFRICA	KL-141	BASALT	-26.87	26.67	2714	0.998576	52.54	0.57	11.87	10.52	0.18	10.6	9.21	1.58	1.68	0.078	599
Kaapvaal Craton	PETROGENESIS OF LATE ARCHEAN FLOOD-TYPE BASIC LAVAS FROM THE KLIPRIVIERSBERG GROUP, VENTERSDORP SUPERGROUP, SOUTH AFRICA	KL-154	BASALT	-26.87	26.67	2714	0.995513	53.59	0.48	12.73	9.71	0.18	10.75	7.75	2.16	1.52	0.07	435
Kaapvaal Craton	PETROGENESIS OF LATE ARCHEAN FLOOD-TYPE BASIC LAVAS FROM THE KLIPRIVIERSBERG GROUP, VENTERSDORP SUPERGROUP, SOUTH AFRICA	KL-146	BASALT	-26.87	26.67	2714	0.995685	51.77	0.52	12.72	9.97	0.19	12.87	7.19	1.98	1.6	0.078	433
Kaapvaal	THE GEOLOGY AND GEOCHEMISTRY OF THE VENTERSDORP SUPERGROUP IN THE AREA BETWEEN VRYBURG, OTTOSDAL AND MAFIKENG	NKV004	BASALT	-25.87	24.73	2714	0.99993	52.29	0.44	13.41	10.99	0.17	8.05	10.14	2.5	1.72	0.08	335
Kaapvaal	THE GEOLOGY AND GEOCHEMISTRY OF THE VENTERSDORP SUPERGROUP IN THE AREA BETWEEN VRYBURG, OTTOSDAL AND MAFIKENG	NKV005	BASALT	-25.87	24.73	2714	0.995883	52.23	0.32	10.78	10.76	0.14	14.07	8.38	1.2	1.87	0.07	307
Kaapvaal	THE GEOLOGY AND GEOCHEMISTRY OF THE VENTERSDORP SUPERGROUP IN THE AREA BETWEEN VRYBURG, OTTOSDAL AND MAFIKENG	NKV074	BASALT	-25.87	24.73	2714	0.993392	51.01	1.06	14.77	13.92	0.32	7.85	6.91	0.39	3.2	0.32	299
Kaapvaal Craton	PETROGENESIS OF LATE ARCHEAN FLOOD-TYPE BASIC LAVAS FROM THE KLIPRIVIERSBERG GROUP, VENTERSDORP SUPERGROUP, SOUTH AFRICA	KA-452	BASALT	-26.87	26.67	2714	0.99978	53.91	1.05	13.76	11.07	0.15	6.57	9.52	2.23	0.38	0.139	241
Kaapvaal	THE GEOLOGY AND GEOCHEMISTRY OF THE VENTERSDORP SUPERGROUP IN THE AREA BETWEEN VRYBURG, OTTOSDAL AND MAFIKENG	NKV028	BASALT	-25.87	24.73	2714	0.994476	53.57	0.34	9.74	10.97	0.13	14.38	8.63	1.18	0.86	0.14	230
Kaapvaal Craton	PETROGENESIS OF LATE ARCHEAN FLOOD-TYPE BASIC LAVAS FROM THE KLIPRIVIERSBERG GROUP, VENTERSDORP SUPERGROUP, SOUTH AFRICA	KL-135	BASALT	-26.87	26.67	2714	0.970382	53.1	0.49	10.35	10.69	0.18	13.62	8.29	1.85	0.18	0.046	70
Abitibi	A 2.7 GA DEPLETED THOLEIITE SUITE: EVIDENCE OF PLUME-ARC INTERACTION IN THE ABITIBI GREENSTONE BELT, CANADA	V44-3	THOLEIITE	48.12	-77.77	2713.5	0.972293	50.34	0.46	18.04	10.66	0.18	10.91	6.46	0.05	1.82	0.03	32
western Melville Peninsula, Canada	GEOCHEMISTRY AND ORIGIN OF THE ARCHEAN PRINCE ALBERT GROUP VOLCANICS, WESTERN MELVILLE PENINSULA, NORTHWEST TERRITORIES, CANADA	6	BASALT	68	-85	2712.5	0.999544	48	0.91	14.93	12.11	0.21	9.18	10.18	2.08	0.25	0.07	110
western Melville Peninsula, Canada	GEOCHEMISTRY AND ORIGIN OF THE ARCHEAN PRINCE ALBERT GROUP VOLCANICS, WESTERN MELVILLE PENINSULA, NORTHWEST TERRITORIES, CANADA	7	BASALT	68	-85	2712.5	0.967863	49.12	0.9	15.06	11.08	0.21	8.11	11.24	2.38	0.11	0.06	80
western Melville Peninsula, Canada	GEOCHEMISTRY AND ORIGIN OF THE ARCHEAN PRINCE ALBERT GROUP VOLCANICS, WESTERN MELVILLE PENINSULA, NORTHWEST TERRITORIES, CANADA	5	BASALT	68	-85	2712.5	0.985392	52.3	0.95	11.84	11.13	0.21	7.65	11.3	2.77	0.08	0.07	60
Yilgarn	MAGNESIAN DYKE SUITES OF THE 2.7 GA KAMBALDA SEQUENCE, WESTERN AUSTRALIA: EVIDENCE FOR COEVAL MELTING OF PLUME ASTHENOSPHERE AND METASOMATISED LITHOSPHERIC MANTLE	MRD001-2	BASALT	-32.2	121.77	2711.5	0.950696	47.81	0.5	10.12	10.82	0.2	16.53	7.3	0.26	0.24	0.04	36.4
Yilgarn	GEOCHEMISTRY OF COEXISTING DEPLETED AND ENRICHED PARINGA BASALTS, IN THE 2.7 GA KALGOORLIE TERRANE, YILGARN CRATON, WESTERN AUSTRALIA: EVIDENCE FOR A HETEROGENEOUS MANTLE PLUME EVENT	SE10-3	BASALT	-31.2	121.67	2710	0.993632	49.96	0.51	10.72	10.14	0.18	12.69	8.81	0.61	1	0.06	339.5
Yilgarn	GEOCHEMISTRY OF COEXISTING DEPLETED AND ENRICHED PARINGA BASALTS, IN THE 2.7 GA KALGOORLIE TERRANE, YILGARN CRATON, WESTERN AUSTRALIA: EVIDENCE FOR A HETEROGENEOUS MANTLE PLUME EVENT	SE13-4	BASALT	-31.2	121.67	2710	0.970597	52.28	0.65	13.25	9.79	0.17	7.95	9.73	1.66	0.69	0.07	222.1
Yilgarn	GEOCHEMISTRY OF COEXISTING DEPLETED AND ENRICHED PARINGA BASALTS, IN THE 2.7 GA KALGOORLIE TERRANE, YILGARN CRATON, WESTERN AUSTRALIA: EVIDENCE FOR A HETEROGENEOUS MANTLE PLUME EVENT	CD339W3-7	BASALT	-31.2	121.67	2710	0.99702	50.46	0.43	8.68	10.22	0.19	16.55	6.78	0.41	0.8	0.04	191.2
Yilgarn	GEOCHEMISTRY OF COEXISTING DEPLETED AND ENRICHED PARINGA BASALTS, IN THE 2.7 GA KALGOORLIE TERRANE, YILGARN CRATON, WESTERN AUSTRALIA: EVIDENCE FOR A HETEROGENEOUS MANTLE PLUME EVENT	KD330-4	BASALT	-31.2	121.67	2710	0.997369	51.88	0.6	12.5	9.9	0.17	10.47	7.87	2.71	0.68	0.06	179.7
Yilgarn	GEOCHEMISTRY OF COEXISTING DEPLETED AND ENRICHED PARINGA BASALTS, IN THE 2.7 GA KALGOORLIE TERRANE, YILGARN CRATON, WESTERN AUSTRALIA: EVIDENCE FOR A HETEROGENEOUS MANTLE PLUME EVENT	SE13-22D	BASALT	-31.2	121.67	2710	0.96844	52.14	0.49	9.85	9.93	0.19	13.64	7.32	0.93	0.62	0.05	158.1
Yilgarn	GEOCHEMISTRY OF COEXISTING DEPLETED AND ENRICHED PARINGA BASALTS, IN THE 2.7 GA KALGOORLIE TERRANE, YILGARN CRATON, WESTERN AUSTRALIA: EVIDENCE FOR A HETEROGENEOUS MANTLE PLUME EVENT	SE13-3	BASALT	-31.2	121.67	2710	0.944501	52.5	0.69	14.05	9.85	0.17	7.19	9.4	2.21	0.48	0.07	147.8
Yilgarn	GEOCHEMISTRY OF COEXISTING DEPLETED AND ENRICHED PARINGA BASALTS, IN THE 2.7 GA KALGOORLIE TERRANE, YILGARN CRATON, WESTERN AUSTRALIA: EVIDENCE FOR A HETEROGENEOUS MANTLE PLUME EVENT	KD330-1	BASALT	-31.2	121.67	2710	0.990771	51.22	0.61	12.56	10.04	0.16	9.78	7.53	1.89	0.32	0.06	123.3
Yilgarn	GEOCHEMISTRY OF COEXISTING DEPLETED AND ENRICHED PARINGA BASALTS, IN THE 2.7 GA KALGOORLIE TERRANE, YILGARN CRATON, WESTERN AUSTRALIA: EVIDENCE FOR A HETEROGENEOUS MANTLE PLUME EVENT	SE10-5	BASALT	-31.2	121.67	2710	0.980054	50.4	0.62	11.95	10.53	0.18	11.61	8.51	1.51	0.27	0.07	85
western Churchill Province	PETROGENESIS OF NEOARCHAEAN VOLCANIC ROCKS OF THE MACQUOID SUPRACRUSTAL BELT: A BACK-ARC SETTING FOR THE NORTHWESTERN HEARNE SUBDOMAIN, WESTERN CHURCHILL PROVINCE, CANADA	98H058	BASALT	62	-92	2710	0.994754	48.51	0.45	18.01	7.38	0.19	6.83	15.14	1.81	0.28	0.05	44
Yilgarn	GEOCHEMISTRY OF COEXISTING DEPLETED AND ENRICHED PARINGA BASALTS, IN THE 2.7 GA KALGOORLIE TERRANE, YILGARN CRATON, WESTERN AUSTRALIA: EVIDENCE FOR A HETEROGENEOUS MANTLE PLUME EVENT	CD339W3-1	BASALT	-31.2	121.67	2710	0.906601	47.87	0.63	13.01	9.03	0.15	6.16	8.68	1.59	0.4	0.06	43.5
Yilgarn	GEOCHEMISTRY OF COEXISTING DEPLETED AND ENRICHED PARINGA BASALTS, IN THE 2.7 GA KALGOORLIE TERRANE, YILGARN CRATON, WESTERN AUSTRALIA: EVIDENCE FOR A HETEROGENEOUS MANTLE PLUME EVENT	CD339W3-6	BASALT	-31.2	121.67	2710	0.992576	51.48	0.41	8.41	10.05	0.18	16.98	6.52	1.11	0.13	0.04	23.2
western Churchill Province	PETROGENESIS OF NEOARCHAEAN VOLCANIC ROCKS OF THE MACQUOID SUPRACRUSTAL BELT: A BACK-ARC SETTING FOR THE NORTHWESTERN HEARNE SUBDOMAIN, WESTERN CHURCHILL PROVINCE, CANADA	98J131B	BASALT	62	-92	2710	0.991145	48	0.63	15.3	10.62	0.19	8.1	13.51	1	0.16	0.05	20
Superior	THE GEOCHEMISTRY OF NEOARCHEAN (CA. 2700 MA) THOLEIITIC BASALTS, TRANSITIONAL TO ALKALINE BASALTS, AND GABBROS, WAWA SUBPROVINCE, CANADA: IMPLICATIONS FOR PETROGENETIC AND GEODYNAMIC PROCESSES	93-15	BASALT	49	-85.5	2706	0.971038	47.6	2.8	13	15.93	0.2	6	8.9	2.5	0.7	0.4	131
Shandong, North China Craton	GEOCHEMISTRY OF ~2.7 GA BASALTS FROM TAISHAN AREA: CONSTRAINTS ON THE EVOLUTION OF EARLY NEOARCHEAN GRANITE-GREENSTONE BELT IN WESTERN SHANDONG PROVINCE, CHINA	T1018	THOLEIITE	36.43	117.28	2706	0.947388	49.6	1	14	14.11	0.2	8.1	7.3	1.7	0.1	0.1	17
North China Craton	GEOCHEMICAL CHARACTERISTICS OF THE NEOARCHEAN (2800-2700 MA) TAISHAN GREENSTONE BELT, NORTH CHINA CRATON: EVIDENCE FOR PLUME-CRATON INTERACTION	2004-46A	BASALT	36.4283	117.466	2704	0.95434	51.72	0.33	14.48	11.66	0.2	6.5	9.79	2.83	0.67		150
North China Craton	GEOCHEMICAL CHARACTERISTICS OF THE NEOARCHEAN (2800-2700 MA) TAISHAN GREENSTONE BELT, NORTH CHINA CRATON: EVIDENCE FOR PLUME-CRATON INTERACTION	2004-46B	BASALT	36.4283	117.466	2704	0.982968	51.63	0.33	14.17	11.75	0.2	6.82	9.93	2.74	0.64		118
North China Craton	GEOCHEMICAL CHARACTERISTICS OF THE NEOARCHEAN (2800-2700 MA) TAISHAN GREENSTONE BELT, NORTH CHINA CRATON: EVIDENCE FOR PLUME-CRATON INTERACTION	2004-25	BASALT	36.0345	117.6	2704	0.9901	49.57	0.33	9.55	13.09	0.31	11.64	12.32	0.81	0.48		36.1
North China Craton	GEOCHEMICAL CHARACTERISTICS OF THE NEOARCHEAN (2800-2700 MA) TAISHAN GREENSTONE BELT, NORTH CHINA CRATON: EVIDENCE FOR PLUME-CRATON INTERACTION	2004-24	BASALT	36.0633	117.573	2704	0.989934	49.65	0.33	15.07	12.32	0.21	7.07	10.72	2.46	0.12		26.1
North China Craton	GEOCHEMICAL CHARACTERISTICS OF THE NEOARCHEAN (2800-2700 MA) TAISHAN GREENSTONE BELT, NORTH CHINA CRATON: EVIDENCE FOR PLUME-CRATON INTERACTION	2004-19	BASALT	36.0612	117.571	2704	0.985318	51.49	0.33	11.69	10.66	0.19	10.77	11.31	1.9	0.18		19.2
North China Craton	GEOCHEMICAL CHARACTERISTICS OF THE NEOARCHEAN (2800-2700 MA) TAISHAN GREENSTONE BELT, NORTH CHINA CRATON: EVIDENCE FOR PLUME-CRATON INTERACTION	2004-22	BASALT	36.061	117.569	2704	0.978705	51.78	0.33	7.06	9.24	0.19	16.76	12.5	0.77	0.3		17.6
esatern Dharwar	BONINITES FROM THE NEOARCHAEAN GADWAL GREENSTONE BELT, EASTERN DHARWAR CRATON, INDIA: IMPLICATIONS FOR ARCHAEAN SUBDUCTION PROCESSES	THOLEIITE	THOLEIITE	15.5	77.5	2702	0.971687	51.62	1.91	12.8	10.72	0.13	6.72	11.03	3.32	0.27	0.3	64
Yilgarn	PHOSPHORUS AND HIGH FIELD STRENGTH ELEMENT ANOMALIES IN ARCHEAN HIGH-MAGNESIAN MAGMAS AS POSSIBLE INDICATORS OF SOURCE MINERALOGY AND DEPTH	372679	BASALT	-32.2	121.77	2702	0.938451	48.4	0.54	11.7	10.98	0.21	12.8	8.2	0.81	0.09	0.05	63
Yilgarn	PHOSPHORUS AND HIGH FIELD STRENGTH ELEMENT ANOMALIES IN ARCHEAN HIGH-MAGNESIAN MAGMAS AS POSSIBLE INDICATORS OF SOURCE MINERALOGY AND DEPTH	372682	BASALT	-32.2	121.77	2702	0.977847	45.5	0.56	12.1	12.06	0.23	14.8	7.77	1.06	0.09	0.05	25
Rae Province, Canada	THE ARCHEAN MURMAC BAY GROUP: EVIDENCE FOR A GIANT ARCHEAN RIFT IN THE RAE PROVINCE, CANADA	4700-0024	BASALT	59.6	-109	2700.5	0.999861	48.37	1.27	14.4	12.06	0.191	7.79	10.24	2.03	0.85	0.14	203
Yilgarn, WESTERN AUSTRALIA	CRUSTALLY CONTAMINATED KOMATIITES AND BASALTS FROM KAMBALDA, WESTERN AUSTRALIA	CD339205.5 M	BASALT	-31.2	121.67	2700	0.999295	52.72	0.6	12.04	10.34	0.18	12.46	9.76	0.69	1.16	0.06	310
Yilgarn, WESTERN AUSTRALIA	CRUSTALLY CONTAMINATED KOMATIITES AND BASALTS FROM KAMBALDA, WESTERN AUSTRALIA	CD339659.4 M	BASALT	-31.2	121.67	2700	0.999825	52.81	0.58	14.81	9.41	0.16	8.48	10.7	2.32	0.63	0.06	251
Yilgarn, WESTERN AUSTRALIA	CRUSTALLY CONTAMINATED KOMATIITES AND BASALTS FROM KAMBALDA, WESTERN AUSTRALIA	CD339283.7 M	BASALT	-31.2	121.67	2700	0.99922	51.05	0.56	11.77	11.8	0.2	13.74	8.66	1.49	0.69	0.04	200
Yilgarn, WESTERN AUSTRALIA	CRUSTALLY CONTAMINATED KOMATIITES AND BASALTS FROM KAMBALDA, WESTERN AUSTRALIA	CD339345.5 M	BASALT	-31.2	121.67	2700	0.999081	52.89	0.56	11.44	10.37	0.17	14.08	7.58	1.53	1.31	0.06	198
Yilgarn, WESTERN AUSTRALIA	CRUSTALLY CONTAMINATED KOMATIITES AND BASALTS FROM KAMBALDA, WESTERN AUSTRALIA	CD339478.2 M	BASALT	-31.2	121.67	2700	0.998956	53.42	0.63	12.61	10.3	0.18	11.62	8.53	2.38	0.27	0.05	98
Yilgarn, WESTERN AUSTRALIA	CRUSTALLY CONTAMINATED KOMATIITES AND BASALTS FROM KAMBALDA, WESTERN AUSTRALIA	CD339700.4 M	BASALT	-31.2	121.67	2700	0.999318	53.84	0.71	14.67	10.68	0.16	7.14	10.74	1.58	0.4	0.08	93
Yilgarn, WESTERN AUSTRALIA	CRUSTALLY CONTAMINATED KOMATIITES AND BASALTS FROM KAMBALDA, WESTERN AUSTRALIA	KD330770.0 FT	BASALT	-31.2	121.67	2700	0.998837	50.85	0.77	16.4	9.84	0.17	8.64	8.93	4.2	0.11	0.09	75
Superior Province	AN ARCHEAN ARC BASALT-NB-ENRICHED BASALT-ADAKITE ASSOCIATION: THE 2.7 GA CONFEDERATION ASSEMBLAGE OF THE BIRCH-UCHI GREENSTONE BELT, SUPERIOR PROVINCE	SL87-05	BASALT	51	-91	2700	0.995555	49.95	0.57	18.02	9.49	0.27	8.57	8.09	3.9	0.05	0.04	59
Yilgarn, WESTERN AUSTRALIA	CRUSTALLY CONTAMINATED KOMATIITES AND BASALTS FROM KAMBALDA, WESTERN AUSTRALIA	KD4088760 FT	BASALT	-31.2	121.67	2700	0.999251	49.99	0.64	14.52	10.92	0.2	13.5	9.19	0.82	0.16	0.07	53
Yilgarn, WESTERN AUSTRALIA	CRUSTALLY CONTAMINATED KOMATIITES AND BASALTS FROM KAMBALDA, WESTERN AUSTRALIA	CD339W31056.1 M	BASALT	-31.2	121.67	2700	0.998718	51.72	0.67	14.81	10.39	0.18	10.31	9.58	2.11	0.16	0.07	38
Yilgarn, WESTERN AUSTRALIA	CRUSTALLY CONTAMINATED KOMATIITES AND BASALTS FROM KAMBALDA, WESTERN AUSTRALIA	KD4088844 FT	BASALT	-31.2	121.67	2700	0.995312	46.77	0.66	14.48	12	0.19	15.96	8.21	1.63	0.04	0.06	20
Superior Province	HIGH-PRECISION EXPLORATION GEOCHEMISTRY: APPLICATIONS FOR VOLCANOGENIC MASSIVE SULFIDE DEPOSITS	KC-506-B	THOLEIITE	48.7	-81.4	2700	0.918032	52.55	0.31	15.94	8.8	0.2	12.8	3.79	4.6		0.04	20
Western Churchill Province	NEOARCHAEAN VOLCANIC ROCKS, CENTRAL HEARNE SUPRACRUSTAL BELT, WESTERN CHURCHILL PROVINCE, CANADA: GEOCHEMICAL AND ISOTOPIC EVIDENCE SUPPORTING INTRA-OCEANIC SUPRA-SUBDUCTION ZONE EXTENSION	HS541	BASALT	62	-94.5	2700	0.906996	49.3	0.56	14.9	9.36	0.14	9.02	10.76	1	0.04	0.04	16
Yilgarn, WESTERN AUSTRALIA	CRUSTALLY CONTAMINATED KOMATIITES AND BASALTS FROM KAMBALDA, WESTERN AUSTRALIA	CD339160.4 M	BASALT	-31.2	121.67	2700	0.99964	52.56	0.6	12.29	10.07	0.18	12.38	9.72	2.12	0.01	0.06	15
Yilgarn, WESTERN AUSTRALIA	CRUSTALLY CONTAMINATED KOMATIITES AND BASALTS FROM KAMBALDA, WESTERN AUSTRALIA	CD3391005.8 M	BASALT	-31.2	121.67	2700	0.998953	49.98	0.66	14.44	10.45	0.23	9.98	12.22	1.82	0.14	0.09	9
Abitibi, CANADA	ARCHEAN SHOSHONITES FROM THE ABITIBI GREENSTONE BELT, CHIBOUGAMU /QUEBEC, CANADA): GEOCHEMISTRY AND TECTONIC SETTING	JW-18	BASALT	49.87	-74.35	2697.5	0.948269	53.86	0.5	12.96	5.52	0.13	6.42	7.19	4.4	0.5	0.46	535
Abitibi, CANADA	ARCHEAN SHOSHONITES FROM THE ABITIBI GREENSTONE BELT, CHIBOUGAMU /QUEBEC, CANADA): GEOCHEMISTRY AND TECTONIC SETTING	JW-15	ANDESITE	49.87	-74.35	2697.5	0.997485	51.74	0.8	12.91	7.31	0.14	6.43	7.23	3.08	0.8	0.26	223
Yilgarn Craton	ELEMENTAL AND ND-ISOTOPE SYSTEMATICS OF THE UPPER BASALT UNIT, 2.7 GA KAMBALDA SEQUENCE: QUANTITATIVE MODELING OF PROGRESSIVE CRUSTAL CONTAMINATION OF PLUME ASTHENOSPHERE	687-3	BASALT	-31.3792	121.774	2697	0.911074	52.81	0.67	14.53	8.8	0.15	6.57	10.51	3.57	0.55	0.08	89.1
Yilgarn Craton	ELEMENTAL AND ND-ISOTOPE SYSTEMATICS OF THE UPPER BASALT UNIT, 2.7 GA KAMBALDA SEQUENCE: QUANTITATIVE MODELING OF PROGRESSIVE CRUSTAL CONTAMINATION OF PLUME ASTHENOSPHERE	36-2	BASALT	-30.2593	120.907	2697	0.968349	49.68	0.5	14.09	10.05	0.19	10.77	8.71	2.27	0.16	0.05	47.8
Yilgarn Craton	ELEMENTAL AND ND-ISOTOPE SYSTEMATICS OF THE UPPER BASALT UNIT, 2.7 GA KAMBALDA SEQUENCE: QUANTITATIVE MODELING OF PROGRESSIVE CRUSTAL CONTAMINATION OF PLUME ASTHENOSPHERE	OB1	BASALT	-30.3075	120.993	2697	0.938821	46.64	0.41	11.21	9.96	0.21	16.65	9	1.23	0.07	0.04	42.1
Dharwar Craton	GEOCHEMISTRY AND PETROGENESIS OF DOLERITE DYKES IN AND AROUND KOLAR SCHIST BELT, SOUTH INDIA	KGF9A	THOLEIITE	13.13	78.13	2696	0.993336	49.1	1.45	13.37	17.88	0.22	6.21	8.3	2.21	0.36	0.07	509
Dharwar Craton	GEOCHEMISTRY AND PETROGENESIS OF DOLERITE DYKES IN AND AROUND KOLAR SCHIST BELT, SOUTH INDIA	KGF7	THOLEIITE	13.13	78.13	2696	0.998597	48.72	1.08	13.97	13.25	0.22	7.62	10.6	2.29	0.39	0.08	429
Dharwar Craton	GEOCHEMISTRY AND PETROGENESIS OF DOLERITE DYKES IN AND AROUND KOLAR SCHIST BELT, SOUTH INDIA	KGF6	THOLEIITE	13.13	78.13	2696	0.99974	49.7	1.26	13.37	14.73	0.23	7.2	9.95	2.21	0.36	0.08	387
Dharwar Craton	GEOCHEMISTRY AND PETROGENESIS OF DOLERITE DYKES IN AND AROUND KOLAR SCHIST BELT, SOUTH INDIA	KGF3B	THOLEIITE	13.13	78.13	2696	0.989309	51.24	1.31	13.95	16.01	0.21	6.88	9.45	2.45	0.4	0.07	384
Dharwar Craton	GEOCHEMISTRY AND PETROGENESIS OF DOLERITE DYKES IN AND AROUND KOLAR SCHIST BELT, SOUTH INDIA	KGF9C	THOLEIITE	13.13	78.13	2696	0.99983	48.75	1.33	13.42	17.43	0.21	6.21	9.1	2.45	0.44	0.06	354
Dharwar Craton	GEOCHEMISTRY AND PETROGENESIS OF DOLERITE DYKES IN AND AROUND KOLAR SCHIST BELT, SOUTH INDIA	KGF4	THOLEIITE	13.13	78.13	2696	0.999707	48.91	1.26	14.24	14.98		7.21	10.45	2.54	0.36	0.08	334
Dharwar Craton	GEOCHEMISTRY AND PETROGENESIS OF AMPHIBOLITES, KOLAR SCHIST BELT, SOUTH INDIA: EVIDENCE FOR KOMATIITE MAGMA DERIVED BY LOW PERCENTAGES OF MELTING OF THE MANTLE	K-14	THOLEIITE	13.13	78.13	2696	0.998549	52.61	1.4	14.11	12.22	0.16	7.3	7.7	2.76	0.14		310
Dharwar Craton	GEOCHEMISTRY AND PETROGENESIS OF DOLERITE DYKES IN AND AROUND KOLAR SCHIST BELT, SOUTH INDIA	KGF8	THOLEIITE	13.13	78.13	2696	0.999925	47.71	1.06	13.79	13.25	0.22	7.46	11	3.43	0.45	0.07	309
Yilgarn, WESTERN AUSTRALIA	ARCHAEAN MAFIC MAGMATISM IN THE KALGOORLIE AREA OF THE YILGARN CRATON, WESTERN AUSTRALIA: A GEOCHEMICAL AND ND ISOTOPIC STUDY OF THE PETROGENETIC AND TECTONIC EVOLUTION OF A GREENSTONE BELT	K353	THOLEIITE	-30.75	121.45	2696	0.997969	51.93	0.59	10.99	10.29	0.22	12.14	5.76	1.4	0.48	0.1	301
Dharwar Craton	GEOCHEMISTRY AND PETROGENESIS OF AMPHIBOLITES, KOLAR SCHIST BELT, SOUTH INDIA: EVIDENCE FOR KOMATIITE MAGMA DERIVED BY LOW PERCENTAGES OF MELTING OF THE MANTLE	K-2	THOLEIITE	13.13	78.13	2696	0.991909	50.32	0.66	14.9	11.93	0.19	7.3	10.52	2.19	0.11		260
Yilgarn, WESTERN AUSTRALIA	ARCHAEAN MAFIC MAGMATISM IN THE KALGOORLIE AREA OF THE YILGARN CRATON, WESTERN AUSTRALIA: A GEOCHEMICAL AND ND ISOTOPIC STUDY OF THE PETROGENETIC AND TECTONIC EVOLUTION OF A GREENSTONE BELT	K373	BASALT	-30.75	121.45	2696	0.994373	45.63	0.61	12.93	8.35	0.19	7.6	10.63	2.2	0	0.08	243
Dharwar Craton	GEOCHEMISTRY AND PETROGENESIS OF DOLERITE DYKES IN AND AROUND KOLAR SCHIST BELT, SOUTH INDIA	KGF3A	THOLEIITE	13.13	78.13	2696	0.999725	51.8	1.24	14.3	13.25	0.2	6.71	9.45	2.29	0.34	0.07	220
Dharwar Craton	GEOCHEMISTRY AND PETROGENESIS OF DOLERITE DYKES IN AND AROUND KOLAR SCHIST BELT, SOUTH INDIA	KGF1	THOLEIITE	13.13	78.13	2696	0.997586	50.3	1.07	13.85	15.37	0.23	7.62	8.7	2.29	0.28	0.06	218
Dharwar Craton	GEOCHEMISTRY AND PETROGENESIS OF DOLERITE DYKES IN AND AROUND KOLAR SCHIST BELT, SOUTH INDIA	KGF2	THOLEIITE	13.13	78.13	2696	0.999955	50.41	0.93	14	13.25	0.21	8.21	9.45	2.45	0.32	0.06	193
Dharwar Craton	GEOCHEMISTRY AND PETROGENESIS OF AMPHIBOLITES, KOLAR SCHIST BELT, SOUTH INDIA: EVIDENCE FOR KOMATIITE MAGMA DERIVED BY LOW PERCENTAGES OF MELTING OF THE MANTLE	K-20	THOLEIITE	13.13	78.13	2696	0.998875	51.11	1.01	15.58	12.86	0.25	9.45	6.3	2.57	0.38		165
Yilgarn, WESTERN AUSTRALIA	ARCHAEAN MAFIC MAGMATISM IN THE KALGOORLIE AREA OF THE YILGARN CRATON, WESTERN AUSTRALIA: A GEOCHEMICAL AND ND ISOTOPIC STUDY OF THE PETROGENETIC AND TECTONIC EVOLUTION OF A GREENSTONE BELT	K372	BASALT	-30.75	121.45	2696	0.934394	46.48	0.62	13.21	8.88	0.21	6.99	9.75	2.98	0.02	0.08	152
Yilgarn, WESTERN AUSTRALIA	ARCHAEAN MAFIC MAGMATISM IN THE KALGOORLIE AREA OF THE YILGARN CRATON, WESTERN AUSTRALIA: A GEOCHEMICAL AND ND ISOTOPIC STUDY OF THE PETROGENETIC AND TECTONIC EVOLUTION OF A GREENSTONE BELT	K374	BASALT	-30.75	121.45	2696	0.913497	47.84	0.62	13.57	8.95	0.19	7.17	12.3	2.3	0.01	0.08	151
Dharwar Craton	GEOCHEMISTRY AND PETROGENESIS OF AMPHIBOLITES, KOLAR SCHIST BELT, SOUTH INDIA: EVIDENCE FOR KOMATIITE MAGMA DERIVED BY LOW PERCENTAGES OF MELTING OF THE MANTLE	K-16	THOLEIITE	13.13	78.13	2696	0.999043	52.7	0.91	14.17	11.9	0.2	7.3	9.24	1.92	0.73		150
Dharwar Craton	GEOCHEMISTRY AND PETROGENESIS OF AMPHIBOLITES, KOLAR SCHIST BELT, SOUTH INDIA: EVIDENCE FOR KOMATIITE MAGMA DERIVED BY LOW PERCENTAGES OF MELTING OF THE MANTLE	19-14	THOLEIITE	13.13	78.13	2696	0.998763	51.13	0.73	14.33	10.11	0.21	7.16	11.76	2.45	0.06		150
Dharwar Craton	GEOCHEMISTRY AND PETROGENESIS OF DOLERITE DYKES IN AND AROUND KOLAR SCHIST BELT, SOUTH INDIA	KGF5	THOLEIITE	13.13	78.13	2696	0.999947	48.19	0.7	14.51	11.19	0.19	9.7	12.7	1.68	0.2	0.06	139
Dharwar Craton	GEOCHEMISTRY AND PETROGENESIS OF AMPHIBOLITES, KOLAR SCHIST BELT, SOUTH INDIA: EVIDENCE FOR KOMATIITE MAGMA DERIVED BY LOW PERCENTAGES OF MELTING OF THE MANTLE	23-11	THOLEIITE	13.13	78.13	2696	0.999721	53.53	0.89	15.76	9.3	0.24	6.56	12.81	0.86	0.05		139
Yilgarn, WESTERN AUSTRALIA	ARCHAEAN MAFIC MAGMATISM IN THE KALGOORLIE AREA OF THE YILGARN CRATON, WESTERN AUSTRALIA: A GEOCHEMICAL AND ND ISOTOPIC STUDY OF THE PETROGENETIC AND TECTONIC EVOLUTION OF A GREENSTONE BELT	K351	THOLEIITE	-30.75	121.45	2696	0.998303	50.05	0.63	12.26	9.25	0.19	8.92	8.14	3.36	0.44	0.11	135
Yilgarn, WESTERN AUSTRALIA	ARCHAEAN MAFIC MAGMATISM IN THE KALGOORLIE AREA OF THE YILGARN CRATON, WESTERN AUSTRALIA: A GEOCHEMICAL AND ND ISOTOPIC STUDY OF THE PETROGENETIC AND TECTONIC EVOLUTION OF A GREENSTONE BELT	K370	BASALT	-30.75	121.45	2696	0.971207	49.33	0.64	13.63	9.04	0.18	8.14	8.32	2.4	0.01	0.09	134
Dharwar Craton	GEOCHEMISTRY AND PETROGENESIS OF AMPHIBOLITES, KOLAR SCHIST BELT, SOUTH INDIA: EVIDENCE FOR KOMATIITE MAGMA DERIVED BY LOW PERCENTAGES OF MELTING OF THE MANTLE	13-5B	THOLEIITE	13.13	78.13	2696	0.995764	51.55	0.98	13.35	12.86	0.16	8.47	10.22	1.21	0.08		121
Dharwar Craton	GEOCHEMISTRY AND PETROGENESIS OF AMPHIBOLITES, KOLAR SCHIST BELT, SOUTH INDIA: EVIDENCE FOR KOMATIITE MAGMA DERIVED BY LOW PERCENTAGES OF MELTING OF THE MANTLE	20-1	THOLEIITE	13.13	78.13	2696	0.999766	53.25	1.15	14.56	10.78	0.23	6.74	9.23	3.38	0.13		111
Dharwar Craton	GEOCHEMISTRY AND PETROGENESIS OF AMPHIBOLITES, KOLAR SCHIST BELT, SOUTH INDIA: EVIDENCE FOR KOMATIITE MAGMA DERIVED BY LOW PERCENTAGES OF MELTING OF THE MANTLE	22-7	THOLEIITE	13.13	78.13	2696	0.995204	48.22	0.91	15.31	11.36	0.17	10.26	11.34	1.61	0.08		110
Yilgarn, WESTERN AUSTRALIA	ARCHAEAN MAFIC MAGMATISM IN THE KALGOORLIE AREA OF THE YILGARN CRATON, WESTERN AUSTRALIA: A GEOCHEMICAL AND ND ISOTOPIC STUDY OF THE PETROGENETIC AND TECTONIC EVOLUTION OF A GREENSTONE BELT	K359	THOLEIITE	-30.75	121.45	2696	0.997369	46.92	0.58	11	9.31	0.14	11.6	6.47	0	0.43	0.06	103
Yilgarn, WESTERN AUSTRALIA	ARCHAEAN MAFIC MAGMATISM IN THE KALGOORLIE AREA OF THE YILGARN CRATON, WESTERN AUSTRALIA: A GEOCHEMICAL AND ND ISOTOPIC STUDY OF THE PETROGENETIC AND TECTONIC EVOLUTION OF A GREENSTONE BELT	K368	BASALT	-30.75	121.45	2696	0.955818	46.79	0.62	13.01	8.51	0.18	7.21	9.31	2.55	0	0.08	99
Dharwar Craton	GEOCHEMISTRY AND PETROGENESIS OF AMPHIBOLITES, KOLAR SCHIST BELT, SOUTH INDIA: EVIDENCE FOR KOMATIITE MAGMA DERIVED BY LOW PERCENTAGES OF MELTING OF THE MANTLE	18-14	THOLEIITE	13.13	78.13	2696	0.984921	50.59	1.15	14.74	12.3	0.16	7.2	11.29	1.99	0.07		99
Dharwar Craton	GEOCHEMISTRY AND PETROGENESIS OF AMPHIBOLITES, KOLAR SCHIST BELT, SOUTH INDIA: EVIDENCE FOR KOMATIITE MAGMA DERIVED BY LOW PERCENTAGES OF MELTING OF THE MANTLE	23-5	THOLEIITE	13.13	78.13	2696	0.994977	50.05	0.81	14.85	11.77	0.2	7.66	11.68	2.13	0.07		80
Yilgarn, WESTERN AUSTRALIA	ARCHAEAN MAFIC MAGMATISM IN THE KALGOORLIE AREA OF THE YILGARN CRATON, WESTERN AUSTRALIA: A GEOCHEMICAL AND ND ISOTOPIC STUDY OF THE PETROGENETIC AND TECTONIC EVOLUTION OF A GREENSTONE BELT	K369	BASALT	-30.75	121.45	2696	0.970568	49.64	0.65	13.33	9.03	0.17	7.77	12.34	1.23	0.01	0.08	75
Yilgarn, WESTERN AUSTRALIA	ARCHAEAN MAFIC MAGMATISM IN THE KALGOORLIE AREA OF THE YILGARN CRATON, WESTERN AUSTRALIA: A GEOCHEMICAL AND ND ISOTOPIC STUDY OF THE PETROGENETIC AND TECTONIC EVOLUTION OF A GREENSTONE BELT	K354	THOLEIITE	-30.75	121.45	2696	0.915584	49.52	0.57	10.94	10.18	0.21	13.57	7.2	2.21	0.07	0.09	67
Dharwar Craton	GEOCHEMISTRY AND PETROGENESIS OF AMPHIBOLITES, KOLAR SCHIST BELT, SOUTH INDIA: EVIDENCE FOR KOMATIITE MAGMA DERIVED BY LOW PERCENTAGES OF MELTING OF THE MANTLE	20-8	THOLEIITE	13.13	78.13	2696	0.999222	53.83	1.01	14.57	9.89	0.16	6.24	12.13	0.7	0.03		64
Dharwar Craton	GEOCHEMISTRY AND PETROGENESIS OF AMPHIBOLITES, KOLAR SCHIST BELT, SOUTH INDIA: EVIDENCE FOR KOMATIITE MAGMA DERIVED BY LOW PERCENTAGES OF MELTING OF THE MANTLE	19-3	THOLEIITE	13.13	78.13	2696	0.996746	52.33	0.82	15.1	11.33	0.29	7.61	10.31	2.17	0.15		62
Dharwar Craton	GEOCHEMISTRY AND PETROGENESIS OF AMPHIBOLITES, KOLAR SCHIST BELT, SOUTH INDIA: EVIDENCE FOR KOMATIITE MAGMA DERIVED BY LOW PERCENTAGES OF MELTING OF THE MANTLE	301	THOLEIITE	13.13	78.13	2696	0.999002	51.31	1.03	13.65	12.73	0.21	8.78	9.22	2.48	0.2		56
Yilgarn, WESTERN AUSTRALIA	ARCHAEAN MAFIC MAGMATISM IN THE KALGOORLIE AREA OF THE YILGARN CRATON, WESTERN AUSTRALIA: A GEOCHEMICAL AND ND ISOTOPIC STUDY OF THE PETROGENETIC AND TECTONIC EVOLUTION OF A GREENSTONE BELT	K352	THOLEIITE	-30.75	121.45	2696	0.997788	52.78	0.63	11.87	8.97	0.18	10.63	6.73	3.24	0.07	0.11	55
Dharwar Craton	GEOCHEMISTRY AND PETROGENESIS OF AMPHIBOLITES, KOLAR SCHIST BELT, SOUTH INDIA: EVIDENCE FOR KOMATIITE MAGMA DERIVED BY LOW PERCENTAGES OF MELTING OF THE MANTLE	16-8	THOLEIITE	13.13	78.13	2696	0.995812	51.27	0.72	16.6	10.33	0.18	6.83	11.82	1.79	0.07		46
Dharwar Craton	GEOCHEMISTRY AND PETROGENESIS OF AMPHIBOLITES, KOLAR SCHIST BELT, SOUTH INDIA: EVIDENCE FOR KOMATIITE MAGMA DERIVED BY LOW PERCENTAGES OF MELTING OF THE MANTLE	13-5A	THOLEIITE	13.13	78.13	2696	0.991201	50.3	1.05	14.98	11.31	0.34	6.73	13.56	1.41			43
Dharwar Craton	GEOCHEMISTRY AND PETROGENESIS OF AMPHIBOLITES, KOLAR SCHIST BELT, SOUTH INDIA: EVIDENCE FOR KOMATIITE MAGMA DERIVED BY LOW PERCENTAGES OF MELTING OF THE MANTLE	22-5	THOLEIITE	13.13	78.13	2696	0.971928	51.04	0.86	15.11	11.32	0.2	7.76	10.36	2.33	0.1		26
Dharwar Craton	GEOCHEMISTRY AND PETROGENESIS OF AMPHIBOLITES, KOLAR SCHIST BELT, SOUTH INDIA: EVIDENCE FOR KOMATIITE MAGMA DERIVED BY LOW PERCENTAGES OF MELTING OF THE MANTLE	22-4	THOLEIITE	13.13	78.13	2696	0.999075	52.98	0.75	14.84	11.64	0.21	7.21	11.2	1.77	0.01		22
Dharwar Craton	GEOCHEMISTRY AND PETROGENESIS OF AMPHIBOLITES, KOLAR SCHIST BELT, SOUTH INDIA: EVIDENCE FOR KOMATIITE MAGMA DERIVED BY LOW PERCENTAGES OF MELTING OF THE MANTLE	13-5C	THOLEIITE	13.13	78.13	2696	0.995595	51.27	1.16	15.26	11.67	0.19	6.88	11.81	0.95	0.16		22
Dharwar Craton	GEOCHEMISTRY AND PETROGENESIS OF AMPHIBOLITES, KOLAR SCHIST BELT, SOUTH INDIA: EVIDENCE FOR KOMATIITE MAGMA DERIVED BY LOW PERCENTAGES OF MELTING OF THE MANTLE	13-5/79	THOLEIITE	13.13	78.13	2696	0.985124	52.32	0.81	14.86	9.9	0.2	6.98	11.91	2.05	0.08		20
Yilgarn, WESTERN AUSTRALIA	ARCHAEAN MAFIC MAGMATISM IN THE KALGOORLIE AREA OF THE YILGARN CRATON, WESTERN AUSTRALIA: A GEOCHEMICAL AND ND ISOTOPIC STUDY OF THE PETROGENETIC AND TECTONIC EVOLUTION OF A GREENSTONE BELT	K357	THOLEIITE	-30.75	121.45	2696	0.981465	51.6	0.55	10.93	7.79	0.16	8.91	7.08	3.15	0.02	0.07	18
Dharwar Craton	GEOCHEMISTRY AND PETROGENESIS OF AMPHIBOLITES, KOLAR SCHIST BELT, SOUTH INDIA: EVIDENCE FOR KOMATIITE MAGMA DERIVED BY LOW PERCENTAGES OF MELTING OF THE MANTLE	23-10	THOLEIITE	13.13	78.13	2696	0.998458	50.27	0.66	14.43	10.8	0.18	8.46	10.84	3	0.08		18
Dharwar Craton	GEOCHEMISTRY AND PETROGENESIS OF AMPHIBOLITES, KOLAR SCHIST BELT, SOUTH INDIA: EVIDENCE FOR KOMATIITE MAGMA DERIVED BY LOW PERCENTAGES OF MELTING OF THE MANTLE	16-6	THOLEIITE	13.13	78.13	2696	0.983952	50.55	0.77	14.37	10.95	0.2	7	11.61	1.88	0.12		16
Slave Province	DEVELOPMENT OF AN ANCIENT BACK-ARC BASIN OVERLYING CONTINENTAL CRUST: THE ARCHEAN PELTIER FORMATION, NORTHWEST TERRITORIES, CANADA	C6-77	basalt	65.25	-113.53	2680	0.961321	47.24	1.11	15.37	12.42	0.2	8.26	4.51	2.22	3.02	0.07	1424
Slave Province	DEVELOPMENT OF AN ANCIENT BACK-ARC BASIN OVERLYING CONTINENTAL CRUST: THE ARCHEAN PELTIER FORMATION, NORTHWEST TERRITORIES, CANADA	L6-11	THOLEIITE	65.25	-113.53	2680	0.96853	48	1.08	13.97	12.31	0.21	6.97	7.76	2.44	1.13	0.08	608
Slave Province	DEVELOPMENT OF AN ANCIENT BACK-ARC BASIN OVERLYING CONTINENTAL CRUST: THE ARCHEAN PELTIER FORMATION, NORTHWEST TERRITORIES, CANADA	L6-9B	basalt	65.25	-113.53	2680	0.974146	48.14	0.58	15.34	10.55	0.19	8.81	7.79	3.11	0.4	0.04	480
Slave Province	DEVELOPMENT OF AN ANCIENT BACK-ARC BASIN OVERLYING CONTINENTAL CRUST: THE ARCHEAN PELTIER FORMATION, NORTHWEST TERRITORIES, CANADA	L6-6B	THOLEIITE	65.25	-113.53	2680	0.926749	45.98	0.9	14.47	11.32	0.21	8.73	11.31	1.65	0.08	0.06	405
Slave Province	DEVELOPMENT OF AN ANCIENT BACK-ARC BASIN OVERLYING CONTINENTAL CRUST: THE ARCHEAN PELTIER FORMATION, NORTHWEST TERRITORIES, CANADA	L6-10B	basalt	65.25	-113.53	2680	0.991076	48.62	0.88	14.95	11.3	0.19	6.88	10.29	2.14	0.46	0.06	400
Kirkland Lake Area	PROVENANCE OF IGNEOUS CLASTS IN CONGLOMERATES OF THE ARCHEAN TIMISKAMING GROUP, KIRKLAND LAKE AREA, ABITIBI GREENSTONE BELT, CANADA	1W	tholeiitic basalt	48.17	-79.75	2673	0.999893	50.4	1.15	14.6	12.33	0	8.53	3.69	1.75	0.11	0.1	1193
Kirkland Lake Area	PROVENANCE OF IGNEOUS CLASTS IN CONGLOMERATES OF THE ARCHEAN TIMISKAMING GROUP, KIRKLAND LAKE AREA, ABITIBI GREENSTONE BELT, CANADA	39G	tholeiitic basalt	48.17	-79.75	2673	0.999966	51.4	0.5	11.1	10.8	0.08	11.3	3.71	0.65	0.54	0.03	237
Zimbabwe	THE GEOCHEMISTRY OF ULTRAMAFIC TO MAFIC VOLCANICS FROM THE BELINGWE GREENSTONE BELT, ZIMBABWE: MAGMATISM IN THE ARCHEAN CONTINENTAL LARGE IGNEOUS PROVINCE	BW495	BASALT	-20.35	30.03	2672	0.971614	53.14	0.55	11.51	9.25	0.14	11.26	7.16	3.04	0.03	0.051	34
Zimbabwe	THE GEOCHEMISTRY OF ULTRAMAFIC TO MAFIC VOLCANICS FROM THE BELINGWE GREENSTONE BELT, ZIMBABWE: MAGMATISM IN THE ARCHEAN CONTINENTAL LARGE IGNEOUS PROVINCE	BX240	BASALT	-20.33	30.03	2672	0.981169	47.73	0.75	14.67	11.09	0.19	8.43	11.73	1.28	0.15	0.064	33
Zimbabwe	THE GEOCHEMISTRY OF ULTRAMAFIC TO MAFIC VOLCANICS FROM THE BELINGWE GREENSTONE BELT, ZIMBABWE: MAGMATISM IN THE ARCHEAN CONTINENTAL LARGE IGNEOUS PROVINCE	BX153	BASALT	-20.33	30.03	2672	0.998459	50.25	1.25	13.79	11.82	0.26	6.2	10.85	1.68	0.1	0.11	29
Zimbabwe	THE GEOCHEMISTRY OF ULTRAMAFIC TO MAFIC VOLCANICS FROM THE BELINGWE GREENSTONE BELT, ZIMBABWE: MAGMATISM IN THE ARCHEAN CONTINENTAL LARGE IGNEOUS PROVINCE	BX235	BASALT	-20.33	30.03	2672	0.995221	52.19	0.53	14.24	8.29	0.14	9	7.51	3.95	0.015	0.049	24
Zimbabwe	THE GEOCHEMISTRY OF ULTRAMAFIC TO MAFIC VOLCANICS FROM THE BELINGWE GREENSTONE BELT, ZIMBABWE: MAGMATISM IN THE ARCHEAN CONTINENTAL LARGE IGNEOUS PROVINCE	BX108	BASALT	-20.35	30.03	2672	0.982678	51.04	0.55	11.27	9.95	0.18	11.48	8.54	2.84	0.023	0.051	20
Zimbabwe	THE GEOCHEMISTRY OF ULTRAMAFIC TO MAFIC VOLCANICS FROM THE BELINGWE GREENSTONE BELT, ZIMBABWE: MAGMATISM IN THE ARCHEAN CONTINENTAL LARGE IGNEOUS PROVINCE	BX119	BASALT	-20.33	30.03	2672	0.927029	51.8	0.56	13.81	9.28	0.16	8.26	10.85	1.68	0.088	0.044	20
Zimbabwe	THE GEOCHEMISTRY OF ULTRAMAFIC TO MAFIC VOLCANICS FROM THE BELINGWE GREENSTONE BELT, ZIMBABWE: MAGMATISM IN THE ARCHEAN CONTINENTAL LARGE IGNEOUS PROVINCE	BX252	BASALT	-20.33	30.03	2672	0.999278	48.56	0.74	14.48	10.99	0.19	8.36	11.66	1.67	0.046	0.059	18
Zimbabwe	THE GEOCHEMISTRY OF ULTRAMAFIC TO MAFIC VOLCANICS FROM THE BELINGWE GREENSTONE BELT, ZIMBABWE: MAGMATISM IN THE ARCHEAN CONTINENTAL LARGE IGNEOUS PROVINCE	BX248	BASALT	-20.33	30.03	2672	0.971229	48.72	0.73	14.26	10.9	0.19	7.48	13.46	0.82	0.093	0.059	18
Slave Province	GEOCHEMISTRY OF THE LATE ARCHEAN BANTING GROUP, YELLOWKNIFE GREENSTONE BELT, SLAVE PROVINCE, CANADA: SIMULTANEOUS MELTING OF THE UPPER MANTLE AND JUVENILE MAFIC CRUST	96-YK-14	basalt	62.5	-114.5	2660	0.981695	48.33	0.95	15.09	12.1	0.2	6.72	9.58	2.11	0.18	0.08	76
Superior Province	IRON-RICH ALKALINE MAGMATISM IN THE ARCHEAN WAWA GREENSTONE BELTS (ONTARIO, CANADA)	PIC-57	THOLEIITE	48.58	-86.28	2650	0.986949	49.76	0.9	12.68	10.55	0.19	8.04	13.41	0.91	0.16	0.1	29.8251
Superior Province	IRON-RICH ALKALINE MAGMATISM IN THE ARCHEAN WAWA GREENSTONE BELTS (ONTARIO, CANADA)	PIC-73	THOLEIITE	48.58	-86.28	2650	0.977962	48.65	0.85	15.97	10.72	0.18	6.01	12	2.91	0.21	0.07	26.6008
Superior Province	IRON-RICH ALKALINE MAGMATISM IN THE ARCHEAN WAWA GREENSTONE BELTS (ONTARIO, CANADA)	PIC-129	THOLEIITE	48.58	-86.28	2650	0.931406	48.16	0.67	12.44	10.81	0.19	9.24	13.02	1.17	0.13	0.07	26.3321
Superior Province	IRON-RICH ALKALINE MAGMATISM IN THE ARCHEAN WAWA GREENSTONE BELTS (ONTARIO, CANADA)	PIC-58	THOLEIITE	48.58	-86.28	2650	0.966758	50.64	0.93	13.07	11.08	0.19	7.52	11.56	1.74	0.17	0.1	15.853
Southern Bastar Craton	PETROLOGY AND GEOCHEMISTRY OF THE LATE ARCHAEAN SILICEOUS HIGH-MAGNESIAN BASALTS (SHMB) FROM KAKLUR, SOUTHERN BASTAR CRATON, CENTRAL INDIA	279	BASALT	18.9242	81.6096	2594.5	0.963463	52.83	0.35	10.35	10.12	0.18	15.57	6.54	1.08	0.71	0.05	133
Dhawar	GEOCHEMISTRY OF THE METAVOLCANICS OF THE HUTTI-MASKI SCHIST BELT, SOUTH INDIA: IMPLICATIONS TO GOLD METALLOGENY IN THE EASTERN DHARWAR CRATON	GH-17	BASALT	15.67	76.58	2586	0.999472	48.8	0.73	11.5	10.1	0.19	10.5	12.6	1.7	0.94		510
Karnataka	RARE EARTH ELEMENT GEOCHEMISTRY OF METABASALTS FROM KOLAR AND HUTTI GOLD-BEARING VOLCANIC BELTS, KARNATAKA CRATON, INDIA	6	BASALT	16.15	76.65	2586	0.998336	51.01	0.69	13.3	12.42	0.22	7.03	10.62	1.82	0.33	0.13	116
Karnataka	RARE EARTH ELEMENT GEOCHEMISTRY OF METABASALTS FROM KOLAR AND HUTTI GOLD-BEARING VOLCANIC BELTS, KARNATAKA CRATON, INDIA	5	BASALT	16.15	76.65	2586	0.984304	50.36	0.82	13.22	13.26	0.16	7	10.05	2.24	0.3	0.19	105
Karnataka	RARE EARTH ELEMENT GEOCHEMISTRY OF METABASALTS FROM KOLAR AND HUTTI GOLD-BEARING VOLCANIC BELTS, KARNATAKA CRATON, INDIA	3	BASALT	13.13	78.13	2586	0.987031	49.35	0.75	12.21	13.31	0.21	8.95	10.61	2.23	0.18	0.15	82
Karnataka	RARE EARTH ELEMENT GEOCHEMISTRY OF METABASALTS FROM KOLAR AND HUTTI GOLD-BEARING VOLCANIC BELTS, KARNATAKA CRATON, INDIA	2	BASALT	13.13	78.13	2586	0.999855	51.02	0.69	12.19	12.52	0.14	6.7	11.23	2.17	0.12	0.14	71
Dhawar	GEOCHEMISTRY OF THE METAVOLCANICS OF THE HUTTI-MASKI SCHIST BELT, SOUTH INDIA: IMPLICATIONS TO GOLD METALLOGENY IN THE EASTERN DHARWAR CRATON	GH-7	BASALT	15.67	76.58	2586	0.994257	49.7	1.3	12.8	13.2	0.18	9.33	10.4	2	0.36		64
Dhawar	GEOCHEMISTRY OF THE METAVOLCANICS OF THE HUTTI-MASKI SCHIST BELT, SOUTH INDIA: IMPLICATIONS TO GOLD METALLOGENY IN THE EASTERN DHARWAR CRATON	GH-10	BASALT	15.67	76.58	2586	0.949299	48.4	0.74	16	10.8	0.18	9.33	12.5	1.9	0.37		56
Dhawar	GEOCHEMISTRY OF THE METAVOLCANICS OF THE HUTTI-MASKI SCHIST BELT, SOUTH INDIA: IMPLICATIONS TO GOLD METALLOGENY IN THE EASTERN DHARWAR CRATON	GH-14	BASALT	15.67	76.58	2586	0.999797	52	0.78	15.8	10.8	0.21	7.65	10.8	1.4	0.39		56
Dhawar	GEOCHEMISTRY OF THE METAVOLCANICS OF THE HUTTI-MASKI SCHIST BELT, SOUTH INDIA: IMPLICATIONS TO GOLD METALLOGENY IN THE EASTERN DHARWAR CRATON	GH-11	BASALT	15.67	76.58	2586	0.955758	45.5	1.33	15.5	13.5	0.21	7.9	12.5	1.96	0.25		48
Dhawar	GEOCHEMISTRY OF THE METAVOLCANICS OF THE HUTTI-MASKI SCHIST BELT, SOUTH INDIA: IMPLICATIONS TO GOLD METALLOGENY IN THE EASTERN DHARWAR CRATON	HG-5B	BASALT	15.67	76.58	2586	0.997699	50	0.99	12.6	12.1	0.18	6.3	9.07	1.9	0.29		44
Dhawar	GEOCHEMISTRY OF THE METAVOLCANICS OF THE HUTTI-MASKI SCHIST BELT, SOUTH INDIA: IMPLICATIONS TO GOLD METALLOGENY IN THE EASTERN DHARWAR CRATON	GH-5	BASALT	15.67	76.58	2586	0.999543	48.2	1.25	15.8	13.4	0.2	7.45	11.9	2.15	0.2		43
Dhawar	GEOCHEMISTRY OF THE METAVOLCANICS OF THE HUTTI-MASKI SCHIST BELT, SOUTH INDIA: IMPLICATIONS TO GOLD METALLOGENY IN THE EASTERN DHARWAR CRATON	GH-12	BASALT	15.67	76.58	2586	0.967057	46.2	1.22	15	13.1	0.2	7.35	11.7	1.8	0.28		40
Dhawar	GEOCHEMISTRY OF THE METAVOLCANICS OF THE HUTTI-MASKI SCHIST BELT, SOUTH INDIA: IMPLICATIONS TO GOLD METALLOGENY IN THE EASTERN DHARWAR CRATON	GH-13	BASALT	15.67	76.58	2586	0.99126	45.1	1.01	14.5	11.4	0.17	6.05	11.5	1.3	0.27		35
Dhawar	GEOCHEMISTRY OF THE METAVOLCANICS OF THE HUTTI-MASKI SCHIST BELT, SOUTH INDIA: IMPLICATIONS TO GOLD METALLOGENY IN THE EASTERN DHARWAR CRATON	GH-8	BASALT	15.67	76.58	2586	0.999951	48.9	0.84	16	11.7	0.2	7.4	14	2	0.15		33
Dhawar	GEOCHEMISTRY OF THE METAVOLCANICS OF THE HUTTI-MASKI SCHIST BELT, SOUTH INDIA: IMPLICATIONS TO GOLD METALLOGENY IN THE EASTERN DHARWAR CRATON	HG-3	BASALT	15.67	76.58	2586	0.999907	51	1.27	12.9	13.8	0.18	6	7.69	2.05	0.21		29
Dhawar	GEOCHEMISTRY OF THE METAVOLCANICS OF THE HUTTI-MASKI SCHIST BELT, SOUTH INDIA: IMPLICATIONS TO GOLD METALLOGENY IN THE EASTERN DHARWAR CRATON	GH-16	BASALT	15.67	76.58	2586	0.999457	45.3	0.73	13.5	12.4	0.27	8.53	8.43	0.95	0.12		22
Dhawar	GEOCHEMISTRY OF THE METAVOLCANICS OF THE HUTTI-MASKI SCHIST BELT, SOUTH INDIA: IMPLICATIONS TO GOLD METALLOGENY IN THE EASTERN DHARWAR CRATON	GH-4	BASALT	15.67	76.58	2586	0.908516	49.1	1.3	15	13	0.19	6.83	12.2	2.1	0.2		22
Central Gawler Craton	PROVENANCE AND TECTONIC DEVELOPMENT OF THE LATE ARCHAEAN GAWLER CRATON, AUSTRALIA; U-PB ZIRCON, GEOCHEMICAL AND SM-ND ISOTOPIC IMPLICATIONS	613125	BASALT	-29.8	135.8	2553	0.993456	47.4	0.35	14	8.15	0.17	7.45	7.87	2.53	0.78	0.03	200
North China Craton	A MORB-ARC BASALT-ADAKITE ASSOCIATION IN THE 2.5 GA WUTAI GREENSTONE BELT: LATE ARCHEAN MAGMATISM AND CRUSTAL GROWTH IN THE NORTH CHINA CRATON	WR20	BASALT	38.5	113	2543	0.97248	45.3	0.82	14.56	11.3	0.2	12.3	5.36	0.66	4.01	0.08	454
North China Craton	A MORB-ARC BASALT-ADAKITE ASSOCIATION IN THE 2.5 GA WUTAI GREENSTONE BELT: LATE ARCHEAN MAGMATISM AND CRUSTAL GROWTH IN THE NORTH CHINA CRATON	WR22	BASALT	38.5	113	2543	0.9817	49.37	1.17	15.16	12	0.21	6.65	7.52	0.95	2.61	0.15	390
North China Craton	A MORB-ARC BASALT-ADAKITE ASSOCIATION IN THE 2.5 GA WUTAI GREENSTONE BELT: LATE ARCHEAN MAGMATISM AND CRUSTAL GROWTH IN THE NORTH CHINA CRATON	WS61	BASALT	38.5	113	2543	0.999254	53.68	0.85	13.58	10.67	0.21	6.42	8.31	1.97	1.25	0.27	325
North China Craton	A MORB-ARC BASALT-ADAKITE ASSOCIATION IN THE 2.5 GA WUTAI GREENSTONE BELT: LATE ARCHEAN MAGMATISM AND CRUSTAL GROWTH IN THE NORTH CHINA CRATON	WR21	BASALT	38.5	113	2543	0.978092	47.99	0.97	15.45	11.36	0.22	9.1	7.81	1.83	1.51	0.09	138
North China Craton	A MORB-ARC BASALT-ADAKITE ASSOCIATION IN THE 2.5 GA WUTAI GREENSTONE BELT: LATE ARCHEAN MAGMATISM AND CRUSTAL GROWTH IN THE NORTH CHINA CRATON	WR15	BASALT	38.5	113	2543	0.970388	49.09	0.81	13.93	14.77	0.24	7.4	10.27	1.53	0.66	0.08	129
North China Craton	A MORB-ARC BASALT-ADAKITE ASSOCIATION IN THE 2.5 GA WUTAI GREENSTONE BELT: LATE ARCHEAN MAGMATISM AND CRUSTAL GROWTH IN THE NORTH CHINA CRATON	WS13	BASALT	38.5	113	2543	0.998713	53.26	0.86	14.83	10.23	0.2	6.48	8.31	2.83	0.57	0.1	128
North China Craton	A MORB-ARC BASALT-ADAKITE ASSOCIATION IN THE 2.5 GA WUTAI GREENSTONE BELT: LATE ARCHEAN MAGMATISM AND CRUSTAL GROWTH IN THE NORTH CHINA CRATON	WR13	BASALT	38.5	113	2543	0.971538	49.52	0.77	13.86	12.49	0.22	7.82	10.73	1.13	0.49	0.07	104
North China Craton	A MORB-ARC BASALT-ADAKITE ASSOCIATION IN THE 2.5 GA WUTAI GREENSTONE BELT: LATE ARCHEAN MAGMATISM AND CRUSTAL GROWTH IN THE NORTH CHINA CRATON	WR10	BASALT	38.5	113	2543	0.955033	49.65	0.74	14.08	12.29	0.25	7.5	10.76	1.61	0.58	0.07	85
North China Craton	A MORB-ARC BASALT-ADAKITE ASSOCIATION IN THE 2.5 GA WUTAI GREENSTONE BELT: LATE ARCHEAN MAGMATISM AND CRUSTAL GROWTH IN THE NORTH CHINA CRATON	WR9	BASALT	38.5	113	2543	0.959673	49.76	0.81	14.13	12.26	0.24	7.39	10.53	1.53	0.69	0.1	80
North China Craton	A MORB-ARC BASALT-ADAKITE ASSOCIATION IN THE 2.5 GA WUTAI GREENSTONE BELT: LATE ARCHEAN MAGMATISM AND CRUSTAL GROWTH IN THE NORTH CHINA CRATON	WS59	BASALT	38.5	113	2543	0.923941	50.09	0.9	13.35	12.64	0.23	6.76	10.45	1.14	0.4	0.08	73
North China Craton	A MORB-ARC BASALT-ADAKITE ASSOCIATION IN THE 2.5 GA WUTAI GREENSTONE BELT: LATE ARCHEAN MAGMATISM AND CRUSTAL GROWTH IN THE NORTH CHINA CRATON	WS30	BASALT	38.5	113	2543	0.982981	50.32	1.04	14.65	11.26	0.21	7.01	8.87	2.38	0.41	0.04	55
Andhra Pradesh, India	GEOCHEMISTRY OF ARCHEAN METAVOLCANIC ROCKS FROM KADIRI SCHIST BELT, ANDHRA PRADESH, INDIA	KMB1	BASALT	13.73	78.03	2535	0.999705	51.5	0.91	12.5	8.25	0.2	12.17	7.4	2.15	1.6	0.14	235
Andhra Pradesh, India	GEOCHEMISTRY OF ARCHEAN METAVOLCANIC ROCKS FROM KADIRI SCHIST BELT, ANDHRA PRADESH, INDIA	KB5	BASALT	13.73	78.03	2535	0.999259	50.16	1.08	14.52	10.79	0.25	6.77	10.43	2.15	0.85		87
Andhra Pradesh, India	GEOCHEMISTRY OF ARCHEAN METAVOLCANIC ROCKS FROM KADIRI SCHIST BELT, ANDHRA PRADESH, INDIA	KB6	BASALT	13.73	78.03	2535	0.997649	50.78	1.06	13.88	9.09	0.23	6.77	10.99	3.05	0.9	0.29	71
Andhra Pradesh, India	GEOCHEMISTRY OF ARCHEAN METAVOLCANIC ROCKS FROM KADIRI SCHIST BELT, ANDHRA PRADESH, INDIA	KB4	BASALT	13.73	78.03	2535	0.999308	49.54	1.37	15.38	10.34	0.2	7.99	10.99	3.05	0.9	0.35	61
North China Craton	GEOCHEMISTRY OF NEOARCHEAN (CA. 2.55-2.50 GA) VOLCANIC AND OPHIOLITIC ROCKS IN THE WUTAISHAN GREENSTONE BELT, CENTRAL OROGENIC BELT, NORTH CHINA CRATON: IMPLICATIONS FPR GEODYNAMIC SETTING AND CONTINENTAL GROWTH	2002-63	BASALT	38.8669	113.714	2525	0.965264	50.6	1.23	15.42	11.85	0.19	6.8	9.48	1.94	1.02	0.14	214
North China Craton	GEOCHEMISTRY OF NEOARCHEAN (CA. 2.55-2.50 GA) VOLCANIC AND OPHIOLITIC ROCKS IN THE WUTAISHAN GREENSTONE BELT, CENTRAL OROGENIC BELT, NORTH CHINA CRATON: IMPLICATIONS FPR GEODYNAMIC SETTING AND CONTINENTAL GROWTH	2002-64A	BASALT	38.8689	113.714	2525	0.997932	50.6	0.97	15.58	10.37	0.2	7.64	9.67	2.95	0.77	0.1	194
Himalayan belt	SM-ND AGE AND PETROGENESIS OF RAMPUR METAVOLCANIC ROCKS, NW HIMALAYAS: LATE ARCHAEAN RELICS IN THE HIMALAYAN BELT	Rj27	THOLEIITE	31	77	2510	0.988552	52.73	1.45	14.13	12.01	0.18	6.26	7	2.95	0.67	0.28	722
Himalayan belt	SM-ND AGE AND PETROGENESIS OF RAMPUR METAVOLCANIC ROCKS, NW HIMALAYAS: LATE ARCHAEAN RELICS IN THE HIMALAYAN BELT	B20	THOLEIITE	31	77	2510	0.97785	50.46	0.73	14.83	10.29	0.16	8.18	7.55	3.71	1.15	0.16	10
Himalayan belt	SM-ND AGE AND PETROGENESIS OF RAMPUR METAVOLCANIC ROCKS, NW HIMALAYAS: LATE ARCHAEAN RELICS IN THE HIMALAYAN BELT	Mnk 14	THOLEIITE	31	77	2510	0.999715	52.71	0.9	13.36	8.96	0.16	7.66	7.85	3.2	2.19	0.24	10

## Sheet: Ti-Eu
Craton	REFERENCE	SAMPLE_ID	ROCK_NAME	LATITUDE	LONGITUDE	C_AGE	Arc_probability3	SIO2	TIO2	AL2O3	FEOT	MNO	MGO	CAO	NA2O	K2O	P2O5	EU
western superior province	PLUME MAGMATISM AND CRUSTAL GROWTH AT 2.9 TO 3.0 GA IN THE STEEP ROCK AND LUMBY LAKE AREA, WESTERN SUPERIOR PROVINCE	96KYT18	BASALT	49	-91	2986	0.995833	49.93	1.39	12.36	8.46	0.15	11.49	8.48	3.07	1.01	0.3	2.01
Superior	USING SEDIMENT GEOCHEMISTRY AND DETRITAL ZIRCON GEOCHRONOLOGY TO CATEGORIZE ERODED IGNEOUS UNITS: AN EXAMPLE FROM THE MESOARCHEAN BIRCH-UCHI GREENSTONE BELT, SUPERIOR PROVINCE	BA-5	BASALT	51.1	-92.6	2975	0.986586	49.96	0.85	4.31	14.19	0.22	15.55	12.81	0.36	0.12	0.05	0.69
SW Greenland	TRACE ELEMENT SYSTEMATICS OF THE NEOARCHEAN FISKENÆSSET ANORTHOSITE COMPLEX AND ASSOCIATED META-VOLCANIC ROCKS, SW GREENLAND: EVIDENCE FOR A MAGMATIC ARC ORIGIN	497134	BASALT	63.197	-49.2828	2973	0.995563	47.8	0.76	16.4	10.26	0.17	9.1	11.2	2.7	0.5	0.06	0.57
SW Greenland	TRACE ELEMENT SYSTEMATICS OF THE NEOARCHEAN FISKENÆSSET ANORTHOSITE COMPLEX AND ASSOCIATED META-VOLCANIC ROCKS, SW GREENLAND: EVIDENCE FOR A MAGMATIC ARC ORIGIN	478862	BASALT	63.1261	-50.3003	2973	0.990081	48.7	0.97	14.9	12.42	0.2	8.3	11.3	1.5	0.2	0.08	0.71
SW Greenland	TRACE ELEMENT SYSTEMATICS OF THE NEOARCHEAN FISKENÆSSET ANORTHOSITE COMPLEX AND ASSOCIATED META-VOLCANIC ROCKS, SW GREENLAND: EVIDENCE FOR A MAGMATIC ARC ORIGIN	478857	BASALT	63.1258	-50.2969	2973	0.990024	48.8	0.9	14.8	12.51	0.19	8.2	11.4	1.6	0.3	0.07	0.72
SW Greenland	TRACE ELEMENT SYSTEMATICS OF THE NEOARCHEAN FISKENÆSSET ANORTHOSITE COMPLEX AND ASSOCIATED META-VOLCANIC ROCKS, SW GREENLAND: EVIDENCE FOR A MAGMATIC ARC ORIGIN	497131	BASALT	63.201	-49.2789	2973	0.911378	46.9	1.17	16.2	12.78	0.2	8	10.1	2.9	0.2	0.09	0.86
SW Greenland	TRACE ELEMENT SYSTEMATICS OF THE NEOARCHEAN FISKENÆSSET ANORTHOSITE COMPLEX AND ASSOCIATED META-VOLCANIC ROCKS, SW GREENLAND: EVIDENCE FOR A MAGMATIC ARC ORIGIN	478864	BASALT	63.1264	-50.3014	2973	0.989454	49.6	1.08	14.2	13.23	0.22	7.8	9.8	2	0.4	0.08	0.81
SW Greenland	TRACE ELEMENT SYSTEMATICS OF THE NEOARCHEAN FISKENÆSSET ANORTHOSITE COMPLEX AND ASSOCIATED META-VOLCANIC ROCKS, SW GREENLAND: EVIDENCE FOR A MAGMATIC ARC ORIGIN	497109	BASALT	63.0234	-49.4691	2973	0.975309	48.4	0.73	15.9	11.61	0.19	7.8	12.1	1.9	0.1	0.05	0.55
SW Greenland	TRACE ELEMENT SYSTEMATICS OF THE NEOARCHEAN FISKENÆSSET ANORTHOSITE COMPLEX AND ASSOCIATED META-VOLCANIC ROCKS, SW GREENLAND: EVIDENCE FOR A MAGMATIC ARC ORIGIN	497142	BASALT	63.1235	-49.8218	2973	0.990945	48.7	0.71	15.4	10.17	0.19	7.6	12.8	2.5	0.8	0.06	0.6
SW Greenland	TRACE ELEMENT SYSTEMATICS OF THE NEOARCHEAN FISKENÆSSET ANORTHOSITE COMPLEX AND ASSOCIATED META-VOLCANIC ROCKS, SW GREENLAND: EVIDENCE FOR A MAGMATIC ARC ORIGIN	478813	BASALT	63.1283	-50.6133	2973	0.985762	47.4	0.65	14.5	11.79	0.17	7	15.5	1.5	0.2	0.05	0.62
SW Greenland	TRACE ELEMENT SYSTEMATICS OF THE NEOARCHEAN FISKENÆSSET ANORTHOSITE COMPLEX AND ASSOCIATED META-VOLCANIC ROCKS, SW GREENLAND: EVIDENCE FOR A MAGMATIC ARC ORIGIN	497124	BASALT	63.0195	-49.4662	2973	0.984773	47	0.77	16.1	10.62	0.26	6.8	15.1	1.8	0.4	0.06	0.59
SW Greenland	TRACE ELEMENT SYSTEMATICS OF THE NEOARCHEAN FISKENÆSSET ANORTHOSITE COMPLEX AND ASSOCIATED META-VOLCANIC ROCKS, SW GREENLAND: EVIDENCE FOR A MAGMATIC ARC ORIGIN	478811	BASALT	63.1367	-50.6175	2973	0.903792	47.3	0.9	15.2	11.34	0.22	6.7	15.1	1.7	0.3	0.06	0.73
Southwest Greenland	AN OVERVIEW OF THE GEOCHEMISTRY OF EOARCHEAN TO MESOARCHEAN ULTRAMAFIC TO MAFIC VOLCANIC ROCKS, SW GREENLAND: IMPLICATIONS FOR MANTLE DEPLETION AND PETROGENETIC PROCESSES AT SUBDUCTION ZONES IN THE EARLY EARTH	508074	BASALT	63	-49.5	2970	0.980377	47.6	0.83	16.7	11.79	0.2	9	9.8	2.4	0.34	0.06	0.61
Southwest Greenland	AN OVERVIEW OF THE GEOCHEMISTRY OF EOARCHEAN TO MESOARCHEAN ULTRAMAFIC TO MAFIC VOLCANIC ROCKS, SW GREENLAND: IMPLICATIONS FOR MANTLE DEPLETION AND PETROGENETIC PROCESSES AT SUBDUCTION ZONES IN THE EARLY EARTH	508069	BASALT	63	-49.5	2970	0.916348	47.6	0.99	15.3	12.78	0.22	8.5	10.8	2	0.22	0.07	0.7
Southwest Greenland	AN OVERVIEW OF THE GEOCHEMISTRY OF EOARCHEAN TO MESOARCHEAN ULTRAMAFIC TO MAFIC VOLCANIC ROCKS, SW GREENLAND: IMPLICATIONS FOR MANTLE DEPLETION AND PETROGENETIC PROCESSES AT SUBDUCTION ZONES IN THE EARLY EARTH	508066	BASALT	63	-49.5	2970	0.98817	47.2	0.92	15.2	13.14	0.24	8.4	10.8	2.3	0.28	0.06	0.7
Southwest Greenland	AN OVERVIEW OF THE GEOCHEMISTRY OF EOARCHEAN TO MESOARCHEAN ULTRAMAFIC TO MAFIC VOLCANIC ROCKS, SW GREENLAND: IMPLICATIONS FOR MANTLE DEPLETION AND PETROGENETIC PROCESSES AT SUBDUCTION ZONES IN THE EARLY EARTH	508079	BASALT	63	-49.5	2970	0.934402	46.2	1.1	16.4	13.05	0.22	7.3	12.2	1.9	0.13	0.09	0.84
Eastern Transvaal, south Africa	A GEOCHEMICAL STUDY OF A PRECAMBRIAN MAFIC DYKE SWARM, EASTERN TRANSVAAL, SOUTH AFRICA	BA-10	THOLEIITE	-25.8	30.5	2965.9	0.983499	53.06	0.6	14.24	9.76	0.17	8.61	9.32	2.45	0.85	0.09	0.82
Pilbara	ARCHEAN BONINITE-LIKE ROCKS IN AN INTRACRATONIC SETTING	142360	BASALT	-20.8	117.8	2965	0.999402	49.21	0.17	13.44	8.48	0.17	16.06	6.1	0.63	1.16	0.03	0.12
Pilbara	ARCHEAN BONINITE-LIKE ROCKS IN AN INTRACRATONIC SETTING	142359	BASALT	-20.8	117.8	2965	0.999463	52.69	0.24	17.67	7.63	0.17	8.64	7.41	2.68	0.09	0.04	0.24
Pilbara	ARCHEAN BONINITE-LIKE ROCKS IN AN INTRACRATONIC SETTING	142194	BASALT	-20.8	117.8	2965	0.992467	53.51	0.26	17.12	8.11	0.16	8.22	8.11	1.65	0.39	0.05	0.33
Pilbara	ARCHEAN BONINITE-LIKE ROCKS IN AN INTRACRATONIC SETTING	142368	BASALT	-20.8	117.8	2965	0.966069	52.65	0.26	16.65	8.67	0.17	7.97	8.1	1.73	0.18	0.04	0.3
Pilbara	EVIDENCE FOR EARLY LREE-ENRICHED MANTLE SOURCE REGIONS: DIVERSE MAGMAS FROM THE C. 3.0 GA MALLINA BASIN, PILBARA CRATON, NW AUSTRALIA	142-281	BASALT	-20.8	117.8	2960	0.969374	53.99	0.48	12.6	9.08	0.16	8.65	8.17	2.2	1.07	0.06	0.69
Uchi-Confederation, Canada	THE GEOCHEMISTRY OF REPETITIVE CYCLICAL VOLCANISM FROM BASALT THROUGH RHYOLITE IN THE UCHI-CONFEDERATION GREENSTONE BELT, CANADA	421	BASALT	51.1	-92.83	2958.6	0.916607	50.2	0.71	15.8	11.2	0.2	8.34	10.7	2.24	0.32	0.04	1.4
Superior	TRACE ELEMENT AND SM-ND SYSTEMATICS OF VOLCANIC AND INTRUSIVE ROCKS FROM THE 3 GA LUMBY LAKE GREENSTONE BELT, SUPERIOR PROVINCE; EVIDENCE FOR ARCHEAN PLUME-ARC INTERACTION	LU95-19	THOLEIITE	48	-90	2951	0.999873	52.69	1.18	14.57	11.01	0.2	6.27	9.52	3.2	0.05	0.09	0.97
Superior Province	KOMATIITE-BASALT-RHYOLITE VOLCANIC ASSOCIATIONS IN NORTHERN SUPERIOR PROVINCE GREENSTONE BELTS; SIGNIFICANCE OF PLUME-ARC INTERACTION IN THE GENERATION OF THE PROTO CONTINENTAL SUPERIOR PROVINCE	NDC87-09C	BASALT	51	-93.5	2950	0.978437	52.98	0.22	6.91	9.63	0.21	16.31	12.05	0.35	0.25	0.02	0.2
Tipasjärvi-Kuhmo-Suomussalmi, Finland	ARCHEAN EVOLUTION OF THE TIPASJÄRVI-KUHMO-SUOMUSSALMI GREENSTONE COMPLEX, FINLAND	20SMS 60-1/28.50	basalt	65.1459	29.0719	2942	0.985648	51.06	0.53	6.71	10.16	0.191	16.79	10.9	0.47	0.05	0.013	0.7
Northern Superior Province	ALLOCHTHONOUS 2.78 GA OCEANIC PLATEAU SLIVERS IN A 2.72 GA CONTINENTAL ARC SEQUENCE; VIZIEN GREENSTONE BELT, NORTHEASTERN SUPERIOR PROVINCE, CANADA	PBA92-2008G	BASALT	58.08	-73	2940	0.942235	52.4	0.52	11.9	9.12	0.18	12.1	8.88	2.7	0.06	0.04	0.55
Northern Superior Province	ALLOCHTHONOUS 2.78 GA OCEANIC PLATEAU SLIVERS IN A 2.72 GA CONTINENTAL ARC SEQUENCE; VIZIEN GREENSTONE BELT, NORTHEASTERN SUPERIOR PROVINCE, CANADA	PBA92-2008C	ANDESITE	58.08	-73	2940	0.9941	52.5	0.96	14.4	9.23	0.15	7.67	8.96	3.9	0.17	0.09	0.84
Brazil	GEOCHEMISTRY OF METAVOLCANIC ROCKS IN THE ARCHEAN GREENSTONE BELT OF IDENTIDADE, SE PARA, BRAZIL	168	THOLEIITE	-6.5	-49.5	2935	0.998304	48.93	0.7	15.84	10.81	0.19	8.62	12.91	1.58	0.08	0.17	0.59
Brazil	GEOCHEMISTRY OF METAVOLCANIC ROCKS IN THE ARCHEAN GREENSTONE BELT OF IDENTIDADE, SE PARA, BRAZIL	270C	THOLEIITE	-6.5	-49.5	2935	0.997611	49.53	0.7	15.79	10.72	0.18	8.55	12.12	2.02	0.08	0.17	0.65
Brazil	GEOCHEMISTRY OF METAVOLCANIC ROCKS IN THE ARCHEAN GREENSTONE BELT OF IDENTIDADE, SE PARA, BRAZIL	9	THOLEIITE	-6.5	-49.5	2935	0.949097	50.12	0.83	14.79	12.15	0.21	8.02	11.31	1.87	0.31	0.18	0.76
Brazil	GEOCHEMISTRY OF METAVOLCANIC ROCKS IN THE ARCHEAN GREENSTONE BELT OF IDENTIDADE, SE PARA, BRAZIL	32A	THOLEIITE	-6.5	-49.5	2935	0.996934	49.37	0.86	15.13	12.18	0.21	8	11.86	1.78	0.2	0.18	0.81
Brazil	GEOCHEMISTRY OF METAVOLCANIC ROCKS IN THE ARCHEAN GREENSTONE BELT OF IDENTIDADE, SE PARA, BRAZIL	57A	THOLEIITE	-6.5	-49.5	2935	0.998162	49.3	0.9	16.25	12.36	0.21	7.91	11.07	1.09	0.31	0.18	0.8
Brazil	GEOCHEMISTRY OF METAVOLCANIC ROCKS IN THE ARCHEAN GREENSTONE BELT OF IDENTIDADE, SE PARA, BRAZIL	266B	THOLEIITE	-6.5	-49.5	2935	0.983458	50.5	0.8	15.07	12.15	0.23	7.83	11.45	1.35	0.21	0.18	0.72
Brazil	GEOCHEMISTRY OF METAVOLCANIC ROCKS IN THE ARCHEAN GREENSTONE BELT OF IDENTIDADE, SE PARA, BRAZIL	56B	THOLEIITE	-6.5	-49.5	2935	0.992738	48.99	0.9	16.06	12.44	0.2	7.68	11.25	1.65	0.28	0.2	0.8
Brazil	GEOCHEMISTRY OF METAVOLCANIC ROCKS IN THE ARCHEAN GREENSTONE BELT OF IDENTIDADE, SE PARA, BRAZIL	478	THOLEIITE	-6.5	-49.5	2935	0.951244	48.66	0.86	16.21	12.12	0.21	7.4	11.15	2.62	0.4	0.16	0.6
North Caribou terrane, Superior	MESO- AND NEOARCHEAN EVOLUTION OF THE ISLAND LAKE GREENSTONE BELT AND THE NORTHWESTERN SUPERIOR PROVINCE: EVIDENCE FROM LITHOGEOCHEMISTRY, ND ISOTOPE DATA, AND U-PB ZIRCON GEOCHRONOLOGY	52-IL-98-12	BASALT	53.8309	-94.2451	2897	0.950284	51.5468	0.673	14.2286	11.02	0.2633	10.3565	6.7916	3.3702	0.4712	0.0615	0.5471
North Caribou terrane, Superior	MESO- AND NEOARCHEAN EVOLUTION OF THE ISLAND LAKE GREENSTONE BELT AND THE NORTHWESTERN SUPERIOR PROVINCE: EVIDENCE FROM LITHOGEOCHEMISTRY, ND ISOTOPE DATA, AND U-PB ZIRCON GEOCHRONOLOGY	102-98-812	BASALT	53.856	-94.2387	2897	0.988322	52.0075	0.7761	15.418	10.68	0.2038	7.2641	9.0335	2.7732	0.8382	0.0828	0.8383
Northern Superior Province	CONSTRAINTS ON EARLY ARCHEAN CRUSTAL EXTRACTION AND THOLEIITIC-KOMATIITIC VOLCANISM IN GREENSTONE BELTS OF NORTHERN SUPERIOR PROVINCE	17	BASALT	59.8	-72	2878	0.980474	48.67	0.54	12.87	10.77	0.25	11.54	11.4	1.48	0.27	0.03	0.52
NW Tanzania	GEOCHEMISTRY AND PETROGENESIS OF VOLCANIC ROCKS OF THE NEOARCHAEAN SUKUMALAND GREENSTONE BELT, NORTHWESTERN TANZANIA	R13	BASALT	-3.08	32.4	2873	0.920868	47.9	0.55	15.76	9.94	0.18	8.86	11.41	1.64	0.1	0.09	0.53
NW Tanzania	GEOCHEMISTRY AND PETROGENESIS OF VOLCANIC ROCKS OF THE NEOARCHAEAN SUKUMALAND GREENSTONE BELT, NORTHWESTERN TANZANIA	R12	BASALT	-3.08	32.4	2873	0.942395	48.32	0.53	15.5	9.76	0.2	8.76	11.59	1.53	0.12	0.09	0.53
NW Tanzania	GEOCHEMISTRY AND PETROGENESIS OF VOLCANIC ROCKS OF THE NEOARCHAEAN SUKUMALAND GREENSTONE BELT, NORTHWESTERN TANZANIA	R78	BASALT	-3.08	32.4	2873	0.933785	51.4	0.82	13.67	10.36	0.15	8.7	9.9	1.19	0.09	0.09	0.72
NW Tanzania	GEOCHEMISTRY AND PETROGENESIS OF VOLCANIC ROCKS OF THE NEOARCHAEAN SUKUMALAND GREENSTONE BELT, NORTHWESTERN TANZANIA	R39	ANDESITE	-3.08	32.4	2873	0.936009	48.66	0.73	16.61	8.57	0.18	8.36	12.84	2.01	0.07	0.09	0.73
NW Tanzania	GEOCHEMISTRY AND PETROGENESIS OF VOLCANIC ROCKS OF THE NEOARCHAEAN SUKUMALAND GREENSTONE BELT, NORTHWESTERN TANZANIA	R38	ANDESITE	-3.08	32.4	2873	0.982879	48.85	0.71	16.1	9.11	0.24	6.54	13.6	2.06	0.17	0.07	0.76
North Caribou terrane, Superior	MESO- AND NEOARCHEAN EVOLUTION OF THE ISLAND LAKE GREENSTONE BELT AND THE NORTHWESTERN SUPERIOR PROVINCE: EVIDENCE FROM LITHOGEOCHEMISTRY, ND ISOTOPE DATA, AND U-PB ZIRCON GEOCHRONOLOGY	52-IL-98-38	BASALT	53.9045	-94.7281	2852	0.911768	53.9821	0.6217	11.9412	9.78	0.2107	7.9231	12.229	1.9217	0.2466	0.0617	0.6485
Baltic Shield	OCEANIC PLATEAU MODEL FOR CONTINENTAL CRUSTAL GROWTH IN THE ARCHAEAN; A CASE STUDY FROM THE KOSTOMUKSHA GREENSTONE BELT, NW BALTIC SHIELD	9444	THOLEIITE	64.65	30.75	2843.5	0.954496	51.1	1.16	14.1	13.05	0.19	7.02	8.67	2.67	0.56	0.09	0.941
Baltic Shield	EARLY MAGMATISM OF THE BELOMORIAN MOBILE BELT, BALTIC SHIELD: LATERAL ZONING AND ISOTOPIC AGE	311-9	BASALT	66.25	33.75	2835	0.993651	46.6	1.03	14.51	15.47	0.52	7.06	11.43	1.04	0.23		0.44
Baltic Shield	EARLY MAGMATISM OF THE BELOMORIAN MOBILE BELT, BALTIC SHIELD: LATERAL ZONING AND ISOTOPIC AGE	450-2	BASALT	66.25	33.75	2835	0.979246	48.8	0.98	15.14	14.02	0.14	7.05	8.54	2.81	0.28	0.1	0.51
Baltic Shield	EARLY MAGMATISM OF THE BELOMORIAN MOBILE BELT, BALTIC SHIELD: LATERAL ZONING AND ISOTOPIC AGE	450-1	BASALT	66.25	33.75	2835	0.998893	48.8	1.04	15.77	13.09	0.19	6.96	9.45	2.25	0.23	0.17	0.61
Jharol Belt, India	GEOCHEMISTRY AND PETROGENESIS OF LATE ARCHAEAN ARAVALLI VOLCANICS, BASEMENT ENCLAVES AND GRANITOIDS, RAJASTHAN	BE.3	NOT-GIVEN	24.93	73.82	2830	0.99232	50.8	0.68	14.5	10.18	0.2	9.4	11.04	1.77	0.53	0.06	0.69
Northern Superior Province	CONSTRAINTS ON EARLY ARCHEAN CRUSTAL EXTRACTION AND THOLEIITIC-KOMATIITIC VOLCANISM IN GREENSTONE BELTS OF NORTHERN SUPERIOR PROVINCE	23	BASALT	60.8	-71	2820	0.996732	46.12	0.51	16.61	10.23	0.19	10	9.36	1.34	2.58	0.04	0.53
Northern Superior Province	CONSTRAINTS ON EARLY ARCHEAN CRUSTAL EXTRACTION AND THOLEIITIC-KOMATIITIC VOLCANISM IN GREENSTONE BELTS OF NORTHERN SUPERIOR PROVINCE	34	BASALT	60.8	-71	2820	0.97016	49.33	0.46	12.6	14.17	0.28	8.05	10.23	2.58	0.27	0.01	0.39
Karelian, Finland	GEOCHEMISTRY OF KOMATIITES FROM THE TIPASJÄRVI, KUHMO, SUOMUSSALMI, ILOMANTSI AND TULPPIO GREENSTONE BELTS, FINLAND: IMPLICATIONS FOR TECTONIC SETTING AND NI SULPHIDE PROSPECTIVITY	12-PTP-03	BASALT	64.24	29.1	2815	0.916119	45.3	0.54	10.6	10.81	0.195	15.8	10.04	0.78	0.299	0.035	0.39
Karelian, Finland	GEOCHEMISTRY OF KOMATIITES FROM THE TIPASJÄRVI, KUHMO, SUOMUSSALMI, ILOMANTSI AND TULPPIO GREENSTONE BELTS, FINLAND: IMPLICATIONS FOR TECTONIC SETTING AND NI SULPHIDE PROSPECTIVITY	HJO-87-79.1	BASALT	62.7	30.9	2815	0.95133	50.2	0.5412	9.41	11.06	0.2024	13.7	7.615	2.65	0.402	0.1648	1.06
Karelian, Finland	GEOCHEMISTRY OF KOMATIITES FROM THE TIPASJÄRVI, KUHMO, SUOMUSSALMI, ILOMANTSI AND TULPPIO GREENSTONE BELTS, FINLAND: IMPLICATIONS FOR TECTONIC SETTING AND NI SULPHIDE PROSPECTIVITY	25-PTP-03	BASALT	64.27	29.05	2815	0.969899	51.1	0.367	14.8	6.25	0.155	11.2	10.93	2.16	0.981	0.018	0.34
Karelian, Finland	GEOCHEMISTRY OF KOMATIITES FROM THE TIPASJÄRVI, KUHMO, SUOMUSSALMI, ILOMANTSI AND TULPPIO GREENSTONE BELTS, FINLAND: IMPLICATIONS FOR TECTONIC SETTING AND NI SULPHIDE PROSPECTIVITY	75-PTP-03	BASALT	65.2	29.1	2815	0.937338	49.8	0.72	16.1	7.77	0.146	9.8	7.51	2.86	0.053	0.05	0.55
Uchi-Confederation, Canada	THE GEOCHEMISTRY OF REPETITIVE CYCLICAL VOLCANISM FROM BASALT THROUGH RHYOLITE IN THE UCHI-CONFEDERATION GREENSTONE BELT, CANADA	407	BASALT	51.1	-92.82	2794	0.944987	49.4	1.07	15.7	12.2	0.22	8.3	11.7	1.15	0	0.05	1.1
Yilgarn	LONG-LIVED, AUTOCHTHONOUS DEVELOPMENT OF THE ARCHEAN MURCHISON DOMAIN, AND IMPLICATIONS FOR YILGARN CRATON TECTONICS	81449	BASALT	-26.5	118.3	2792	0.997417	50	0.4	10.8	8.39	0.19	14.9	9.21	1.15	0.06	0.08	0.4
Karelian, Finland	KALIKORVA STRUCTURE AND ITS POSITION IN THE SYSTEM OF THE NORTHERN KARELIAN GREENSTONE BELTS: GEOCHEMICAL AND GEOCHRONOLOGICAL DATA	35/12A	BASALT	66.78	32	2785	0.959567	45.9	0.74	12.2	11.11	0.22	11.63	14.62	1.25	0.89	0.2	1.2
Yilgarn	KOMATIITES OF THE WILDARA-LEONORA BELT, YILGARN CRATON, WA: THE MISSING LINK IN THE KALGOORLIE TERRANE?	WD103-193.4	basalt	-28.5	121.5	2785	0.950906	52.43	0.61	13.56	10.35	0.16	9.68	8.27	3.81	0.16	0.04	0.55
Northern Karelia, Finland	HIGH-MG, LOW-TI QUARTZ AMPHIBOLITES OF GREENSTONE BELTS FROM NORTHERN KARELIA - METAMORPHOSED ARCHEAN ANALOGUES OF BONINITES?	N-333	BASALT	66.25	33.75	2778	0.977729	47.13	0.41	10.08	11.64	0.18	16.59	10.48	0.49	0.06	0.05	0.373
Superior	GEOCHEMISTRY OF BONINITE-TYPE VOLCANIC ROCKS IN THE FROTET-EVANS GREENSTONE BELT, OPATICA SUBPROVINCE, QUEBEC: IMPLICATIONS FOR THE EVOLUTION OF ARCHEAN GREENSTONE BELTS	135587IC	BASALT	51	-74	2774	0.977552	49.5	0.37	13.7	10.2	0.2	13	6.1	1.5	0.8	0.1	0.25
Superior	GEOCHEMISTRY OF BONINITE-TYPE VOLCANIC ROCKS IN THE FROTET-EVANS GREENSTONE BELT, OPATICA SUBPROVINCE, QUEBEC: IMPLICATIONS FOR THE EVOLUTION OF ARCHEAN GREENSTONE BELTS	94-1359	THOLEIITE	51	-74	2774	0.995178	48.4	0.6	14	8.91	0.2	11.8	8.8	0.2	1.7	0	0.58
Superior	GEOCHEMISTRY OF BONINITE-TYPE VOLCANIC ROCKS IN THE FROTET-EVANS GREENSTONE BELT, OPATICA SUBPROVINCE, QUEBEC: IMPLICATIONS FOR THE EVOLUTION OF ARCHEAN GREENSTONE BELTS	135685IC	BASALT	51	-74	2774	0.995637	51.3	0.37	13.6	9.7	0.2	11.3	8.2	1.9	0.1	0.01	0.4
Superior	GEOCHEMISTRY OF BONINITE-TYPE VOLCANIC ROCKS IN THE FROTET-EVANS GREENSTONE BELT, OPATICA SUBPROVINCE, QUEBEC: IMPLICATIONS FOR THE EVOLUTION OF ARCHEAN GREENSTONE BELTS	92-6532	THOLEIITE	51	-74	2774	0.997307	46.6	0.62	15.3	9.81	0.2	10.5	11.1	0.2	1.5	0.05	0.54
Superior	GEOCHEMISTRY OF BONINITE-TYPE VOLCANIC ROCKS IN THE FROTET-EVANS GREENSTONE BELT, OPATICA SUBPROVINCE, QUEBEC: IMPLICATIONS FOR THE EVOLUTION OF ARCHEAN GREENSTONE BELTS	93-12559	ANDESITE	51	-74	2774	0.955459	53.1	0.42	14.4	7.38	0.2	9.8	11.1	1.7	0.1	0.02	0.36
Superior	GEOCHEMISTRY OF BONINITE-TYPE VOLCANIC ROCKS IN THE FROTET-EVANS GREENSTONE BELT, OPATICA SUBPROVINCE, QUEBEC: IMPLICATIONS FOR THE EVOLUTION OF ARCHEAN GREENSTONE BELTS	135643IC	ANDESITE	51	-74	2774	0.995293	52.2	0.36	13.7	10.6	0.2	9.3	9.7	1.7	0.1	0.01	0.4
Superior	GEOCHEMISTRY OF BONINITE-TYPE VOLCANIC ROCKS IN THE FROTET-EVANS GREENSTONE BELT, OPATICA SUBPROVINCE, QUEBEC: IMPLICATIONS FOR THE EVOLUTION OF ARCHEAN GREENSTONE BELTS	96-12067	BASALT	51	-74	2774	0.990537	52.4	0.76	13.6	8.73	0.2	8.4	8.5	3.1	1.2	0.3	1.5
Superior	GEOCHEMISTRY OF BONINITE-TYPE VOLCANIC ROCKS IN THE FROTET-EVANS GREENSTONE BELT, OPATICA SUBPROVINCE, QUEBEC: IMPLICATIONS FOR THE EVOLUTION OF ARCHEAN GREENSTONE BELTS	133731IC	BASALT	51	-74	2774	0.949731	49	0.44	14.5	8.6	0.2	7	10.7	1.8	0.3	0.09	0.36
Tipasjärvi-Kuhmo-Suomussalmi, Finland	ARCHEAN EVOLUTION OF THE TIPASJÄRVI-KUHMO-SUOMUSSALMI GREENSTONE COMPLEX, FINLAND	195TOH 93-1	BASALT	64.2465	29.0605	2770	0.943734	47.8	0.51	10.23	11.09	0.245	13.59	11.64	0.96	0.13	0.032	1
Tipasjärvi-Kuhmo-Suomussalmi, Finland	ARCHEAN EVOLUTION OF THE TIPASJÄRVI-KUHMO-SUOMUSSALMI GREENSTONE COMPLEX, FINLAND	174TOH 93-1	BASALT	64.2389	29.087	2770	0.965338	51.1	0.68	14.5	9.97	0.231	8.6	11.77	2.23	0.23	0.044	0.9
Tipasjärvi-Kuhmo-Suomussalmi, Finland	ARCHEAN EVOLUTION OF THE TIPASJÄRVI-KUHMO-SUOMUSSALMI GREENSTONE COMPLEX, FINLAND	2ARO 93-2/225.00	BASALT	64.4465	29.0465	2770	0.975936	49.39	0.68	14.13	12.27	0.334	6.08	8.29	1.94	0.16	0.038	0.9
Yilgarn	LONG-LIVED, AUTOCHTHONOUS DEVELOPMENT OF THE ARCHEAN MURCHISON DOMAIN, AND IMPLICATIONS FOR YILGARN CRATON TECTONICS	81511	BASALT	-26.5	118.3	2769.5	0.982246	48.6	0.56	10.2	11.26	0.18	14.5	8.14	0.72	0.17	0.08	0.65
Yilgarn	LONG-LIVED, AUTOCHTHONOUS DEVELOPMENT OF THE ARCHEAN MURCHISON DOMAIN, AND IMPLICATIONS FOR YILGARN CRATON TECTONICS	81517	BASALT	-26.5	118.3	2769.5	0.99707	50.2	0.42	10.7	9.37	0.16	14.5	8.31	1.18	0.16	0.07	0.42
Yilgarn	LONG-LIVED, AUTOCHTHONOUS DEVELOPMENT OF THE ARCHEAN MURCHISON DOMAIN, AND IMPLICATIONS FOR YILGARN CRATON TECTONICS	81524	BASALT	-26.5	118.3	2769.5	0.996612	51.2	0.43	11.4	9.24	0.17	12.9	8.8	0.82	0.12	0.08	0.4
Yilgarn	LONG-LIVED, AUTOCHTHONOUS DEVELOPMENT OF THE ARCHEAN MURCHISON DOMAIN, AND IMPLICATIONS FOR YILGARN CRATON TECTONICS	190551	BASALT	-26.5	118.3	2769.5	0.998178	48.81	0.829	14.167	10.79	0.187	7.136	13.215	1.198	0.117	0.077	0.818
Tipasjärvi-Kuhmo-Suomussalmi, Finland	ARCHEAN EVOLUTION OF THE TIPASJÄRVI-KUHMO-SUOMUSSALMI GREENSTONE COMPLEX, FINLAND	5-HP-92	BASALT	64.2324	29.0853	2748	0.96267	49.49	0.77	15.73	11.28	0.22	7.28	12.83	1.16	0.15	0.05	1.1
Dharwar Craton	PETROGENESIS AND SOURCE CHARACTERISTICS OF METATHOLEIITES FROM THE ARCHEAN RAMAGIRI SCHIST BELT, EASTERN PART OF DHARWAR CRATON, INDIA	C30	THOLEIITE	14.25	77.55	2746	0.999527	48.11	0.52	16.74	12.08	0.15	12.63	6.89	2.54	0.16		0.795
Dharwar Craton	PETROGENESIS AND SOURCE CHARACTERISTICS OF METATHOLEIITES FROM THE ARCHEAN RAMAGIRI SCHIST BELT, EASTERN PART OF DHARWAR CRATON, INDIA	C53	THOLEIITE	14.25	77.55	2746	0.999446	52.77	0.53	10.79	11.94	0.2	11.41	9.61	2.52	0		0.63
Eastern Dharwar	GEOCHEMISTRY OF THE NEO-ARCHAEAN HIGH-MG BASALTS, BONINITES AND ADAKITES FROM THE KUSHTAGI-HUNGUND GREENSTONE BELT OF THE EASTERN DHARWAR CRATON (EDC); IMPLICATIONS FOR THE TECTONIC SETTING	RIH-19	BASALT	15.8975	76.0181	2746	0.950415	51.47	0.45	14.1	9.48	0.17	10.96	10.63	1.31	0.08	0.03	0.45
Dharwar	GEOCHEMICAL SYSTEMATICS OF THOLEIITIC BASALTS FROM THE 2.7 GA RAMAGIRI-HUNGUND COMPOSITE GREENSTONE BELT, DHARWAR CRATON	P24	BASALT	14.75	77.25	2746	0.954087	49.9	0.64	13.22	11.07	0.2	10.08	10.45	2.44	0.18	0.05	0.49
Dharwar Craton	PETROGENESIS AND SOURCE CHARACTERISTICS OF METATHOLEIITES FROM THE ARCHEAN RAMAGIRI SCHIST BELT, EASTERN PART OF DHARWAR CRATON, INDIA	W50	THOLEIITE	14.25	77.5	2746	0.999517	50.25	0.71	15.76	11.5	0.18	8.92	9.31	2.63	0.03		0.655
Dharwar Craton	PETROGENESIS AND SOURCE CHARACTERISTICS OF METATHOLEIITES FROM THE ARCHEAN RAMAGIRI SCHIST BELT, EASTERN PART OF DHARWAR CRATON, INDIA	C6	THOLEIITE	14.25	77.55	2746	0.999889	51.5	0.86	16.79	10.74	0.14	8.89	8.02	2.58	0.35		1.023
Dharwar	GEOCHEMICAL SYSTEMATICS OF THOLEIITIC BASALTS FROM THE 2.7 GA RAMAGIRI-HUNGUND COMPOSITE GREENSTONE BELT, DHARWAR CRATON	P33	BASALT	14.75	77.25	2746	0.944505	50.71	0.64	13.41	10.04	0.17	8.86	11.74	2	0.13	0.05	0.54
Dharwar	GEOCHEMICAL SYSTEMATICS OF THOLEIITIC BASALTS FROM THE 2.7 GA RAMAGIRI-HUNGUND COMPOSITE GREENSTONE BELT, DHARWAR CRATON	P31	BASALT	14.75	77.25	2746	0.948955	50.54	0.6	12.93	10.49	0.18	8.71	12.97	1.63	0.22	0.05	0.58
Dharwar Craton	PETROGENESIS AND SOURCE CHARACTERISTICS OF METATHOLEIITES FROM THE ARCHEAN RAMAGIRI SCHIST BELT, EASTERN PART OF DHARWAR CRATON, INDIA	W16	THOLEIITE	14.25	77.5	2746	0.976397	49.6	0.97	15.65	12.56	0.21	8.63	9.17	2.68	0.12		0.828
Dharwar Craton	PETROGENESIS AND SOURCE CHARACTERISTICS OF METATHOLEIITES FROM THE ARCHEAN RAMAGIRI SCHIST BELT, EASTERN PART OF DHARWAR CRATON, INDIA	Z50	THOLEIITE	14.25	77.55	2746	0.999342	47.2	0.67	14.8	10.8	0.17	8.38	8.74	2.47	0.03		0.655
Dharwar Craton	PETROGENESIS AND SOURCE CHARACTERISTICS OF METATHOLEIITES FROM THE ARCHEAN RAMAGIRI SCHIST BELT, EASTERN PART OF DHARWAR CRATON, INDIA	E43	THOLEIITE	14.25	77.55	2746	0.994628	52.61	0.67	14.99	9.77	0.17	8.35	11.42	1.82	0.1		0.625
Dharwar Craton	PETROGENESIS AND SOURCE CHARACTERISTICS OF METATHOLEIITES FROM THE ARCHEAN RAMAGIRI SCHIST BELT, EASTERN PART OF DHARWAR CRATON, INDIA	42	THOLEIITE	14.25	77.55	2746	0.998068	53.13	0.64	15.04	9.21	0.16	8.2	11.73	1.75	0.09		0.607
Dharwar Craton	PETROGENESIS AND SOURCE CHARACTERISTICS OF METATHOLEIITES FROM THE ARCHEAN RAMAGIRI SCHIST BELT, EASTERN PART OF DHARWAR CRATON, INDIA	W46	THOLEIITE	14.25	77.5	2746	0.987361	48.67	0.84	15.62	12.08	0.21	8.15	10.49	1.98	0		0.657
Dharwar Craton	PETROGENESIS AND SOURCE CHARACTERISTICS OF METATHOLEIITES FROM THE ARCHEAN RAMAGIRI SCHIST BELT, EASTERN PART OF DHARWAR CRATON, INDIA	E40	THOLEIITE	14.25	77.55	2746	0.996044	52.46	0.7	15.06	9.98	0.17	8.06	11.56	1.85	0.1		0.64
Dharwar Craton	PETROGENESIS AND SOURCE CHARACTERISTICS OF METATHOLEIITES FROM THE ARCHEAN RAMAGIRI SCHIST BELT, EASTERN PART OF DHARWAR CRATON, INDIA	C29	THOLEIITE	14.25	77.55	2746	0.986045	53.68	0.94	14.6	11.46	0.17	8.01	10.18	1.04	0.28		0.961
Dharwar Craton	PETROGENESIS AND SOURCE CHARACTERISTICS OF METATHOLEIITES FROM THE ARCHEAN RAMAGIRI SCHIST BELT, EASTERN PART OF DHARWAR CRATON, INDIA	W22	THOLEIITE	14.25	77.5	2746	0.997857	49.95	0.86	15.49	11.7	0.2	7.81	12.61	1.07	0.02		0.772
Dharwar Craton	PETROGENESIS AND SOURCE CHARACTERISTICS OF METATHOLEIITES FROM THE ARCHEAN RAMAGIRI SCHIST BELT, EASTERN PART OF DHARWAR CRATON, INDIA	W51	THOLEIITE	14.25	77.5	2746	0.997691	50.88	0.74	15.86	12.26	0.2	7.8	9.01	3.06	0.1		0.835
Dharwar Craton	PETROGENESIS AND SOURCE CHARACTERISTICS OF METATHOLEIITES FROM THE ARCHEAN RAMAGIRI SCHIST BELT, EASTERN PART OF DHARWAR CRATON, INDIA	45674	THOLEIITE	14.25	77.5	2746	0.988244	50.63	0.83	15.82	11.86	0.2	7.6	10.71	1.89	0.12		0.698
Dharwar Craton	PETROGENESIS AND SOURCE CHARACTERISTICS OF METATHOLEIITES FROM THE ARCHEAN RAMAGIRI SCHIST BELT, EASTERN PART OF DHARWAR CRATON, INDIA	W25	THOLEIITE	14.25	77.5	2746	0.996704	51.97	0.92	15.16	11.97	0.19	7.47	9.77	2.12	0.07		0.833
Dharwar Craton	PETROGENESIS AND SOURCE CHARACTERISTICS OF METATHOLEIITES FROM THE ARCHEAN RAMAGIRI SCHIST BELT, EASTERN PART OF DHARWAR CRATON, INDIA	E24	THOLEIITE	14.25	77.55	2746	0.996692	49.7	0.96	15.5	12.3	0.21	7.34	11.47	2.22	0.2		0.871
Dharwar Craton	PETROGENESIS AND SOURCE CHARACTERISTICS OF METATHOLEIITES FROM THE ARCHEAN RAMAGIRI SCHIST BELT, EASTERN PART OF DHARWAR CRATON, INDIA	W1	THOLEIITE	14.25	77.5	2746	0.996455	49.7	1.01	15.28	12.11	0.2	7.31	9.87	2.69	0.06		0.825
Dharwar Craton	PETROGENESIS AND SOURCE CHARACTERISTICS OF METATHOLEIITES FROM THE ARCHEAN RAMAGIRI SCHIST BELT, EASTERN PART OF DHARWAR CRATON, INDIA	W49	THOLEIITE	14.25	77.5	2746	0.998908	50.11	0.9	16.25	12.24	0.21	7.25	11.39	1.33	0		0.816
Dharwar Craton	PETROGENESIS AND SOURCE CHARACTERISTICS OF METATHOLEIITES FROM THE ARCHEAN RAMAGIRI SCHIST BELT, EASTERN PART OF DHARWAR CRATON, INDIA	W32	THOLEIITE	14.25	77.5	2746	0.990837	50.04	0.96	14.9	12.46	0.21	7.05	12.04	2.02	0.18		0.851
Dharwar Craton	PETROGENESIS AND SOURCE CHARACTERISTICS OF METATHOLEIITES FROM THE ARCHEAN RAMAGIRI SCHIST BELT, EASTERN PART OF DHARWAR CRATON, INDIA	Z49	THOLEIITE	14.25	77.55	2746	0.999097	47.5	0.85	15.4	11.6	0.2	6.87	10.8	1.26	0		0.816
Eastern Dharwar	SIGNIFICANCE OF THE ARCHEAN BIMODAL VOLCANICS FROM THE RAMNAGIRI SCHIST BELT IN THE FORMATION OF EASTERN DHARWAR CRATON	RM#72	BASALT	14.25	77.55	2746	0.999944	47.4	2.08	12.7	18	0.13	6.64	6.21	2.67	0.48	0.38	1.41
Dharwar Craton	PETROGENESIS AND SOURCE CHARACTERISTICS OF METATHOLEIITES FROM THE ARCHEAN RAMAGIRI SCHIST BELT, EASTERN PART OF DHARWAR CRATON, INDIA	E36	THOLEIITE	14.25	77.55	2746	0.977218	50.61	0.97	14.77	12.19	0.22	6.47	11.78	2.59	0.3		0.948
Dharwar Craton	PETROGENESIS AND SOURCE CHARACTERISTICS OF METATHOLEIITES FROM THE ARCHEAN RAMAGIRI SCHIST BELT, EASTERN PART OF DHARWAR CRATON, INDIA	W47	THOLEIITE	14.25	77.5	2746	0.997388	49.9	0.85	15.88	12.31	0.22	6.43	12.31	1.43	0.04		0.835
Dharwar Craton	PETROGENESIS AND SOURCE CHARACTERISTICS OF METATHOLEIITES FROM THE ARCHEAN RAMAGIRI SCHIST BELT, EASTERN PART OF DHARWAR CRATON, INDIA	W11	THOLEIITE	14.25	77.5	2746	0.999309	50.72	0.81	15.75	10.71	0.17	6.42	13.76	1.33	0.08		0.796
Dharwar Craton	PETROGENESIS AND SOURCE CHARACTERISTICS OF METATHOLEIITES FROM THE ARCHEAN RAMAGIRI SCHIST BELT, EASTERN PART OF DHARWAR CRATON, INDIA	W52	THOLEIITE	14.25	77.5	2746	0.990886	49.33	0.92	15.71	12.22	0.21	6.26	13.3	1.84	0.14		0.868
Superior	TRACE ELEMENT GEOCHEMISTRY OF THE MEEN-DEMPSTER GREENSTONE BELT, UCHI SUBPROVINCE, SUPERIOR PROVINCE, CANADA: BACK-ARC DEVELOPMENT ON THE MARGINS OF AN ARCHEAN PROTOCONTINENT	82GRS-0292	THOLEIITE	51	-91	2742	0.990648	48.27	0.95	15.07	11.92	0.19	8.44	11.92	1.62	0.24	0.05	0.87
Superior	TRACE ELEMENT GEOCHEMISTRY OF THE MEEN-DEMPSTER GREENSTONE BELT, UCHI SUBPROVINCE, SUPERIOR PROVINCE, CANADA: BACK-ARC DEVELOPMENT ON THE MARGINS OF AN ARCHEAN PROTOCONTINENT	82GRS-0088	THOLEIITE	51	-91	2742	0.994262	50.81	0.84	14.3	11.5	0.19	6.98	12.17	1.62	0.21	0.1	0.71
Superior	TRACE ELEMENT GEOCHEMISTRY OF THE MEEN-DEMPSTER GREENSTONE BELT, UCHI SUBPROVINCE, SUPERIOR PROVINCE, CANADA: BACK-ARC DEVELOPMENT ON THE MARGINS OF AN ARCHEAN PROTOCONTINENT	84GRS-0032	THOLEIITE	51	-91	2742	0.931072	49.95	1.78	14.78	13.68	0.23	6.33	7.66	3.82	0.12	0.11	1.28
Superior	BASIC LAVAS OF THE ARCHEAN LA GRANDE GREENSTONE BELT: PRODUCTS OF POLYBARIC FRACTIONATION AND CRUSTAL CONTAMINATION	285C	ANDESITE	53.75	-75.5	2741.5	0.95542	49.79	0.4	9.39	8.81	0.18	15.43	10.34	1.49	0.54	0.09	0.76
Superior	BASIC LAVAS OF THE ARCHEAN LA GRANDE GREENSTONE BELT: PRODUCTS OF POLYBARIC FRACTIONATION AND CRUSTAL CONTAMINATION	216	THOLEIITE	53.75	-75.5	2741.5	0.998145	48.47	0.83	16.51	10.85	0.2	7.61	9.4	2.23	0.02	0.06	0.59
Superior	BASIC LAVAS OF THE ARCHEAN LA GRANDE GREENSTONE BELT: PRODUCTS OF POLYBARIC FRACTIONATION AND CRUSTAL CONTAMINATION	18A	THOLEIITE	53.75	-75.5	2741.5	0.98706	51.83	1.05	15.02	11.1	0.23	6.83	9.46	1.81	0.16	0.06	0.72
Superior	NEOARCHEAN EVOLUTION OF DIFFERING CONVERGENT MARGIN ASSEMBLAGES IN THE WABIGOON SUBPROVINCE: GEOCHEMICAL AND GEOCHRONOLOGICAL EVIDENCE FROM THE LAKE OF THE WOODS GREENSTONE BELTS, SUPERIOR PROVINCE, NORTHWESTERN CANADA	85S-113	basalt	49.2	-94.6	2738	0.997787	47.6	0.46	10.6	10.22	0.19	13.8	11.9	0.83	0	0.03	0.58
Superior	NEOARCHEAN EVOLUTION OF DIFFERING CONVERGENT MARGIN ASSEMBLAGES IN THE WABIGOON SUBPROVINCE: GEOCHEMICAL AND GEOCHRONOLOGICAL EVIDENCE FROM THE LAKE OF THE WOODS GREENSTONE BELTS, SUPERIOR PROVINCE, NORTHWESTERN CANADA	86-168	basalt	49.2	-94.6	2738	0.989183	47.1	0.5	17.8	9.36	0.15	9.39	10.7	1.42	0.17	0.04	0.48
Superior	NEOARCHEAN EVOLUTION OF DIFFERING CONVERGENT MARGIN ASSEMBLAGES IN THE WABIGOON SUBPROVINCE: GEOCHEMICAL AND GEOCHRONOLOGICAL EVIDENCE FROM THE LAKE OF THE WOODS GREENSTONE BELTS, SUPERIOR PROVINCE, NORTHWESTERN CANADA	86-359	basalt	49.2	-94.6	2738	0.992091	49.9	0.6	13.3	10.71	0.15	8.54	9.12	2.97	0.03	0.04	0.63
Superior	NEOARCHEAN EVOLUTION OF DIFFERING CONVERGENT MARGIN ASSEMBLAGES IN THE WABIGOON SUBPROVINCE: GEOCHEMICAL AND GEOCHRONOLOGICAL EVIDENCE FROM THE LAKE OF THE WOODS GREENSTONE BELTS, SUPERIOR PROVINCE, NORTHWESTERN CANADA	85S-336	basalt	49.2	-94.6	2738	0.986964	47.5	0.57	15.6	9.94	0.17	8.45	9.86	2.89	0.02	0.01	0.6
Superior	NEOARCHEAN EVOLUTION OF DIFFERING CONVERGENT MARGIN ASSEMBLAGES IN THE WABIGOON SUBPROVINCE: GEOCHEMICAL AND GEOCHRONOLOGICAL EVIDENCE FROM THE LAKE OF THE WOODS GREENSTONE BELTS, SUPERIOR PROVINCE, NORTHWESTERN CANADA	87-615	basalt	49.2	-94.6	2738	0.998718	47.9	0.77	14.3	12.69	0.2	8.27	8.66	1.74	0.04	0.05	1.49
Superior	NEOARCHEAN EVOLUTION OF DIFFERING CONVERGENT MARGIN ASSEMBLAGES IN THE WABIGOON SUBPROVINCE: GEOCHEMICAL AND GEOCHRONOLOGICAL EVIDENCE FROM THE LAKE OF THE WOODS GREENSTONE BELTS, SUPERIOR PROVINCE, NORTHWESTERN CANADA	93-23	basalt	49.2	-94.6	2738	0.94847	49.2	0.73	14.3	12.15	0.21	8.05	11.3	1.71	0.09	0.07	0.67
Superior	NEOARCHEAN EVOLUTION OF DIFFERING CONVERGENT MARGIN ASSEMBLAGES IN THE WABIGOON SUBPROVINCE: GEOCHEMICAL AND GEOCHRONOLOGICAL EVIDENCE FROM THE LAKE OF THE WOODS GREENSTONE BELTS, SUPERIOR PROVINCE, NORTHWESTERN CANADA	93-37	basalt	49.2	-94.6	2738	0.978724	46.8	0.67	14.9	10.8	0.18	7.6	9.83	0.29	0.02	0.07	0.64
Superior	NEOARCHEAN EVOLUTION OF DIFFERING CONVERGENT MARGIN ASSEMBLAGES IN THE WABIGOON SUBPROVINCE: GEOCHEMICAL AND GEOCHRONOLOGICAL EVIDENCE FROM THE LAKE OF THE WOODS GREENSTONE BELTS, SUPERIOR PROVINCE, NORTHWESTERN CANADA	32874	basalt	49.2	-94.6	2738	0.972948	48.57	0.87	14.9	12.12	0.21	7.57	10.74	1.88	0.62	0.06	0.74
Uchi-Confederation, Canada	THE GEOCHEMISTRY OF REPETITIVE CYCLICAL VOLCANISM FROM BASALT THROUGH RHYOLITE IN THE UCHI-CONFEDERATION GREENSTONE BELT, CANADA	462	BASALT	51.12	-92.63	2737	0.963083	47.1	0.9	17.6	11.6	0.19	9.68	9.6	2.98	0.03	0.02	0.76
Uchi-Confederation, Canada	THE GEOCHEMISTRY OF REPETITIVE CYCLICAL VOLCANISM FROM BASALT THROUGH RHYOLITE IN THE UCHI-CONFEDERATION GREENSTONE BELT, CANADA	461	BASALT	51.1	-92.63	2737	0.962269	48.9	0.8	17	10	0.17	8.91	10.9	3.07	0	0.02	1.04
Abitibi	THE KEY TUFFITE, MATAGAMI CAMP, ABITIBI GREENSTONE BELT, CANADA: PETROGENESIS AND IMPLICATIONS FOR VMS FORMATION AND EXPLORATION	969353	basalt	49.75	-77.63	2725.65	0.997539	53.4434	0.4181	16.5273	7.18	0.0477	14.0922	0.01	0.073	0.5063	0.015	0.43
Superior Province	KOMATIITE FLOODING OF A RIFTED ARCHEAN RHYOLITIC ARC COMPLEX: GEOCHEMICAL SIGNATURE AND TECTONIC SIGNIFICANCE OF THE STOUGHTON-ROQUEMAURE GROUP, ABITIBI GREENSTONE BELT, CANADA	WP-94-5	BASALT	48.5	-79.2	2725	0.980624	47.27	0.66	14.87	10.55	0.2	9.41	8.94	1.96	0.4	0.04	0.46
Superior	GEOCHEMISTRY AND ORIGIN OF ARCHEAN VOLCANIC ROCKS FROM THE UPPER KEEWATIN ASSEMBLAGE (CA. 2.7 GA), LAKE OF THE WOODS GREENSTONE BELT, WESTERN WABIGOON SUBPROVINCE, SUPERIOR PROVINCE, CANADA	K40	THOLEIITE	49.2	-94.6	2723	0.993098	50.87	0.51	12.72	11.75	0.17	11.66	10.59	1.48	0	0.25	0.75
Superior	GEOCHEMISTRY AND ORIGIN OF ARCHEAN VOLCANIC ROCKS FROM THE UPPER KEEWATIN ASSEMBLAGE (CA. 2.7 GA), LAKE OF THE WOODS GREENSTONE BELT, WESTERN WABIGOON SUBPROVINCE, SUPERIOR PROVINCE, CANADA	K170	THOLEIITE	49.2	-94.6	2723	0.990998	50.34	0.58	12.71	11.06	0.18	11.39	11.79	1.56	0.26	0.13	0.57
Superior	GEOCHEMISTRY AND ORIGIN OF ARCHEAN VOLCANIC ROCKS FROM THE UPPER KEEWATIN ASSEMBLAGE (CA. 2.7 GA), LAKE OF THE WOODS GREENSTONE BELT, WESTERN WABIGOON SUBPROVINCE, SUPERIOR PROVINCE, CANADA	K153	THOLEIITE	49.2	-94.6	2723	0.981447	52.42	0.57	13.71	9.79	0.17	9.72	10.85	2.59	0.01	0.17	0.87
Superior	GEOCHEMISTRY AND ORIGIN OF ARCHEAN VOLCANIC ROCKS FROM THE UPPER KEEWATIN ASSEMBLAGE (CA. 2.7 GA), LAKE OF THE WOODS GREENSTONE BELT, WESTERN WABIGOON SUBPROVINCE, SUPERIOR PROVINCE, CANADA	K146	ANDESITE	49.2	-94.6	2723	0.959864	53.61	0.86	16.4	10.86	0.2	8.82	5.05	3.18	0.78	0.25	0.93
Superior	GEOCHEMISTRY AND ORIGIN OF ARCHEAN VOLCANIC ROCKS FROM THE UPPER KEEWATIN ASSEMBLAGE (CA. 2.7 GA), LAKE OF THE WOODS GREENSTONE BELT, WESTERN WABIGOON SUBPROVINCE, SUPERIOR PROVINCE, CANADA	K120	BASALT	49.2	-94.6	2723	0.989653	51.58	0.92	12.92	11.32	0.15	8.37	10.84	2.42	1.49		1.5
Superior	DECIPHERING AN ARCHEAN MANTLE PLUME: ABITIBI GREENSTONE BELT, CANADA	ROQ-8	BASALT	48.2	-80	2723	0.910109	49.87	0.73	13.48	10.69	0.17	8.14	10.67	2.8	0.03	0.05	0.74
Superior	DECIPHERING AN ARCHEAN MANTLE PLUME: ABITIBI GREENSTONE BELT, CANADA	ROQ-8B	BASALT	48.2	-80	2723	0.99465	49.85	0.74	13.77	10.62	0.17	7.83	10.77	2.87	0.03	0.06	0.52
Superior	DECIPHERING AN ARCHEAN MANTLE PLUME: ABITIBI GREENSTONE BELT, CANADA	ROQ-1B	BASALT	48.2	-80	2723	0.976287	50.89	0.76	13.66	10.86	0.18	7.32	8.74	3.46	0.06	0.06	0.57
Superior	GEOCHEMISTRY AND ORIGIN OF ARCHEAN VOLCANIC ROCKS FROM THE UPPER KEEWATIN ASSEMBLAGE (CA. 2.7 GA), LAKE OF THE WOODS GREENSTONE BELT, WESTERN WABIGOON SUBPROVINCE, SUPERIOR PROVINCE, CANADA	K159	THOLEIITE	49.2	-94.6	2723	0.99776	51.37	0.63	14.87	9.41	0.18	6.81	10.63	2.98	0.01	0.11	1.06
Abitibi	SPATIAL AND TEMPORAL VARIATIONS IN THE GEOCHEMISTRY OF KOMATIITES AND KOMATIITIC BASALTS IN THE ABITIBI GREENSTONE BELT	ROQ95-7	BASALT	48.2	-80	2722.5	0.999879	50.58	0.84	9.18	11.8	0.19	16.49	9.03	1.51	0.01	0.06	0.64
Yilgarn	LONG-LIVED, AUTOCHTHONOUS DEVELOPMENT OF THE ARCHEAN MURCHISON DOMAIN, AND IMPLICATIONS FOR YILGARN CRATON TECTONICS	190540	BASALT	-26.5	118.3	2722.5	0.999887	53.387	0.626	15.097	7.46	0.145	6.794	10.82	2.548	0.486	0.101	0.553
Yilgarn	LONG-LIVED, AUTOCHTHONOUS DEVELOPMENT OF THE ARCHEAN MURCHISON DOMAIN, AND IMPLICATIONS FOR YILGARN CRATON TECTONICS	190507	BASALT	-26.5	118.3	2722.5	0.907314	51.993	0.615	14.351	9.81	0.179	6.684	10.278	1.849	0.304	0.101	0.621
Superior	GENESIS OF ARCHEAN KOMATIITES FROM MUNRO TOWNSHIP, ONTARIO: TRACE-ELEMENT EVIDENCE	158	THOLEIITE	48.2	-80.1	2720	0.999857	50.4	1.14	9.5	12.8	0.02	9.1	10.2	3.8	0.03		1.78
Superior	THE CHARACTERISTICS AND ORIGIN OF THE BIG LAKE MAFIC-ULTRAMAFIC-HOSTED VOLCANOGENIC MASSIVE SULFIDE OCCURRENCE, MARATHON, ONTARIO, CANADA	39-K	BASALT	48.6	-86.1	2719	0.988342	47.1	1	6.45	12.81	0.27	16.72	9.42	0.32	2.15	0.07	0.793
Superior	THE CHARACTERISTICS AND ORIGIN OF THE BIG LAKE MAFIC-ULTRAMAFIC-HOSTED VOLCANOGENIC MASSIVE SULFIDE OCCURRENCE, MARATHON, ONTARIO, CANADA	626192	BASALT	48.6	-86.1	2719	0.982124	48.47	0.76	13.88	11.94	0.22	8.23	10.11	1.92	0.94	0.05	0.8
Superior	PÉTROLOGIE DES ROCHES VOLCANIQUES DU SILLON DE ROCHES VERTES ARCHÉENNES DE MATAGAMI - CHIBOUGAMU À L^OUEST DE CHAPAIS (ABITIBI EST, QUÉBEC). 2. LE GROUPE HAUTEMENT POTASSIQUE D^OPÉMISCA	6048D	BASALT	49.75	-74.5	2717	0.999539	50.29	0.75	16.57	9.07	0.13	7.83	10.78	2.99	1.38	0.21	1.3
Kaapvaal Craton	PETROGENESIS OF LATE ARCHEAN FLOOD-TYPE BASIC LAVAS FROM THE KLIPRIVIERSBERG GROUP, VENTERSDORP SUPERGROUP, SOUTH AFRICA	KL-135	BASALT	-26.87	26.67	2714	0.970382	53.1	0.49	10.35	10.69	0.18	13.62	8.29	1.85	0.18	0.046	0.47
Kaapvaal Craton	PETROGENESIS OF LATE ARCHEAN FLOOD-TYPE BASIC LAVAS FROM THE KLIPRIVIERSBERG GROUP, VENTERSDORP SUPERGROUP, SOUTH AFRICA	KL-146	BASALT	-26.87	26.67	2714	0.995685	51.77	0.52	12.72	9.97	0.19	12.87	7.19	1.98	1.6	0.078	0.58
Kaapvaal Craton	PETROGENESIS OF LATE ARCHEAN FLOOD-TYPE BASIC LAVAS FROM THE KLIPRIVIERSBERG GROUP, VENTERSDORP SUPERGROUP, SOUTH AFRICA	KL-154	BASALT	-26.87	26.67	2714	0.995513	53.59	0.48	12.73	9.71	0.18	10.75	7.75	2.16	1.52	0.07	0.71
Kaapvaal Craton	PETROGENESIS OF LATE ARCHEAN FLOOD-TYPE BASIC LAVAS FROM THE KLIPRIVIERSBERG GROUP, VENTERSDORP SUPERGROUP, SOUTH AFRICA	KL-141	BASALT	-26.87	26.67	2714	0.998576	52.54	0.57	11.87	10.52	0.18	10.6	9.21	1.58	1.68	0.078	0.53
Southern Volcanic Zone, Superior Province	PHYSICAL VOLCANOLOGY, STRATIGRAPHY, AND LITHOGEOCHEMISTRY OF AN ARCHEAN VOLCANIC ARC: EVOLUTION FROM PLUME-RELATED VOLCANISM TO ARC RIFTING OF SE ABITIBI GREENSTONE BELT, VAL D^OR, CANADA	CS99-2193A	BASALT	48.12	-77.77	2714	0.985673	48.4	0.45	14.6	9.9	0.15	10.5	9.9	2.13	0.05	0.09	0.55
Kaapvaal Craton	PETROGENESIS OF LATE ARCHEAN FLOOD-TYPE BASIC LAVAS FROM THE KLIPRIVIERSBERG GROUP, VENTERSDORP SUPERGROUP, SOUTH AFRICA	KL-138	BASALT	-26.87	26.67	2714	0.983611	51.82	0.69	15.13	10.75	0.2	6.84	8.46	3.37	1.46	0.087	0.82
Abitibi	A 2.7 GA DEPLETED THOLEIITE SUITE: EVIDENCE OF PLUME-ARC INTERACTION IN THE ABITIBI GREENSTONE BELT, CANADA	V44-3	THOLEIITE	48.12	-77.77	2713.5	0.972293	50.34	0.46	18.04	10.66	0.18	10.91	6.46	0.05	1.82	0.03	0.38
western Melville Peninsula, Canada	GEOCHEMISTRY AND ORIGIN OF THE ARCHEAN PRINCE ALBERT GROUP VOLCANICS, WESTERN MELVILLE PENINSULA, NORTHWEST TERRITORIES, CANADA	7	BASALT	68	-85	2712.5	0.967863	49.12	0.9	15.06	11.08	0.21	8.11	11.24	2.38	0.11	0.06	1.3
western Melville Peninsula, Canada	GEOCHEMISTRY AND ORIGIN OF THE ARCHEAN PRINCE ALBERT GROUP VOLCANICS, WESTERN MELVILLE PENINSULA, NORTHWEST TERRITORIES, CANADA	5	BASALT	68	-85	2712.5	0.985392	52.3	0.95	11.84	11.13	0.21	7.65	11.3	2.77	0.08	0.07	0.9
Yilgarn	MAGNESIAN DYKE SUITES OF THE 2.7 GA KAMBALDA SEQUENCE, WESTERN AUSTRALIA: EVIDENCE FOR COEVAL MELTING OF PLUME ASTHENOSPHERE AND METASOMATISED LITHOSPHERIC MANTLE	MRD001-2	BASALT	-32.2	121.77	2711.5	0.950696	47.81	0.5	10.12	10.82	0.2	16.53	7.3	0.26	0.24	0.04	0.4
Yilgarn, WESTERN AUSTRALIA	ARCHEAN BASIC VOLCANISM IN THE EASTERN GOLDFIELDS PROVINCE, YILGARN BLOCK, WESTERN AUSTRALIA	21	BASALT	-31.2	121.67	2711.5	0.988823	52.3	0.59	12.42	10.12	0.18	9.77	10.39	1.46	0.46	0.06	0.72
Yilgarn, WESTERN AUSTRALIA	ARCHEAN BASIC VOLCANISM IN THE EASTERN GOLDFIELDS PROVINCE, YILGARN BLOCK, WESTERN AUSTRALIA	10	BASALT	-31.2	121.67	2711.5	0.98105	50.6	0.68	14.2	10.54	0.2	8.65	12.16	1.57	0.07	0.06	0.53
Yilgarn, WESTERN AUSTRALIA	ARCHEAN BASIC VOLCANISM IN THE EASTERN GOLDFIELDS PROVINCE, YILGARN BLOCK, WESTERN AUSTRALIA	9	BASALT	-31.2	121.67	2711.5	0.989273	51.6	0.67	14.4	10.62	0.19	8.03	11.5	1.72	0.11	0.06	0.61
Yilgarn, WESTERN AUSTRALIA	ARCHEAN BASIC VOLCANISM IN THE EASTERN GOLDFIELDS PROVINCE, YILGARN BLOCK, WESTERN AUSTRALIA	32	BASALT	-31.2	121.67	2711.5	0.988301	53.7	0.75	16.4	8.34	0.13	7.4	7.78	3.69	0.09	0.07	0.52
Yilgarn, WESTERN AUSTRALIA	ARCHEAN BASIC VOLCANISM IN THE EASTERN GOLDFIELDS PROVINCE, YILGARN BLOCK, WESTERN AUSTRALIA	2	BASALT	-31.2	121.67	2711.5	0.994483	49	0.91	14.4	12.01	0.2	7.24	10.24	3.26	0.13	0.07	0.77
Yilgarn, WESTERN AUSTRALIA	ARCHEAN BASIC VOLCANISM IN THE EASTERN GOLDFIELDS PROVINCE, YILGARN BLOCK, WESTERN AUSTRALIA	1	BASALT	-31.2	121.67	2711.5	0.983841	49.5	0.89	15.3	11.36	0.21	7.23	11.98	2.21	0.15	0.08	0.73
Yilgarn	GEOCHEMISTRY OF COEXISTING DEPLETED AND ENRICHED PARINGA BASALTS, IN THE 2.7 GA KALGOORLIE TERRANE, YILGARN CRATON, WESTERN AUSTRALIA: EVIDENCE FOR A HETEROGENEOUS MANTLE PLUME EVENT	CD339W3-6	BASALT	-31.2	121.67	2710	0.992576	51.48	0.41	8.41	10.05	0.18	16.98	6.52	1.11	0.13	0.04	0.38
Yilgarn	GEOCHEMISTRY OF COEXISTING DEPLETED AND ENRICHED PARINGA BASALTS, IN THE 2.7 GA KALGOORLIE TERRANE, YILGARN CRATON, WESTERN AUSTRALIA: EVIDENCE FOR A HETEROGENEOUS MANTLE PLUME EVENT	CD339W3-7	BASALT	-31.2	121.67	2710	0.99702	50.46	0.43	8.68	10.22	0.19	16.55	6.78	0.41	0.8	0.04	0.39
Yilgarn	GEOCHEMISTRY OF COEXISTING DEPLETED AND ENRICHED PARINGA BASALTS, IN THE 2.7 GA KALGOORLIE TERRANE, YILGARN CRATON, WESTERN AUSTRALIA: EVIDENCE FOR A HETEROGENEOUS MANTLE PLUME EVENT	SE13-22D	BASALT	-31.2	121.67	2710	0.96844	52.14	0.49	9.85	9.93	0.19	13.64	7.32	0.93	0.62	0.05	0.49
Yilgarn	GEOCHEMISTRY OF COEXISTING DEPLETED AND ENRICHED PARINGA BASALTS, IN THE 2.7 GA KALGOORLIE TERRANE, YILGARN CRATON, WESTERN AUSTRALIA: EVIDENCE FOR A HETEROGENEOUS MANTLE PLUME EVENT	SE10-3	BASALT	-31.2	121.67	2710	0.993632	49.96	0.51	10.72	10.14	0.18	12.69	8.81	0.61	1	0.06	0.72
Yilgarn	GEOCHEMISTRY OF COEXISTING DEPLETED AND ENRICHED PARINGA BASALTS, IN THE 2.7 GA KALGOORLIE TERRANE, YILGARN CRATON, WESTERN AUSTRALIA: EVIDENCE FOR A HETEROGENEOUS MANTLE PLUME EVENT	SE10-5	BASALT	-31.2	121.67	2710	0.980054	50.4	0.62	11.95	10.53	0.18	11.61	8.51	1.51	0.27	0.07	0.62
Yilgarn	GEOCHEMISTRY OF COEXISTING DEPLETED AND ENRICHED PARINGA BASALTS, IN THE 2.7 GA KALGOORLIE TERRANE, YILGARN CRATON, WESTERN AUSTRALIA: EVIDENCE FOR A HETEROGENEOUS MANTLE PLUME EVENT	KD330-4	BASALT	-31.2	121.67	2710	0.997369	51.88	0.6	12.5	9.9	0.17	10.47	7.87	2.71	0.68	0.06	0.66
Yilgarn	GEOCHEMISTRY OF COEXISTING DEPLETED AND ENRICHED PARINGA BASALTS, IN THE 2.7 GA KALGOORLIE TERRANE, YILGARN CRATON, WESTERN AUSTRALIA: EVIDENCE FOR A HETEROGENEOUS MANTLE PLUME EVENT	KD330-1	BASALT	-31.2	121.67	2710	0.990771	51.22	0.61	12.56	10.04	0.16	9.78	7.53	1.89	0.32	0.06	0.65
western Churchill Province	PETROGENESIS OF NEOARCHAEAN VOLCANIC ROCKS OF THE MACQUOID SUPRACRUSTAL BELT: A BACK-ARC SETTING FOR THE NORTHWESTERN HEARNE SUBDOMAIN, WESTERN CHURCHILL PROVINCE, CANADA	98J131B	BASALT	62	-92	2710	0.991145	48	0.63	15.3	10.62	0.19	8.1	13.51	1	0.16	0.05	0.6
Yilgarn	GEOCHEMISTRY OF COEXISTING DEPLETED AND ENRICHED PARINGA BASALTS, IN THE 2.7 GA KALGOORLIE TERRANE, YILGARN CRATON, WESTERN AUSTRALIA: EVIDENCE FOR A HETEROGENEOUS MANTLE PLUME EVENT	SE13-4	BASALT	-31.2	121.67	2710	0.970597	52.28	0.65	13.25	9.79	0.17	7.95	9.73	1.66	0.69	0.07	0.7
Yilgarn	GEOCHEMISTRY OF COEXISTING DEPLETED AND ENRICHED PARINGA BASALTS, IN THE 2.7 GA KALGOORLIE TERRANE, YILGARN CRATON, WESTERN AUSTRALIA: EVIDENCE FOR A HETEROGENEOUS MANTLE PLUME EVENT	SE13-3	BASALT	-31.2	121.67	2710	0.944501	52.5	0.69	14.05	9.85	0.17	7.19	9.4	2.21	0.48	0.07	0.78
western Churchill Province	PETROGENESIS OF NEOARCHAEAN VOLCANIC ROCKS OF THE MACQUOID SUPRACRUSTAL BELT: A BACK-ARC SETTING FOR THE NORTHWESTERN HEARNE SUBDOMAIN, WESTERN CHURCHILL PROVINCE, CANADA	98H058	BASALT	62	-92	2710	0.994754	48.51	0.45	18.01	7.38	0.19	6.83	15.14	1.81	0.28	0.05	0.56
Yilgarn	GEOCHEMISTRY OF COEXISTING DEPLETED AND ENRICHED PARINGA BASALTS, IN THE 2.7 GA KALGOORLIE TERRANE, YILGARN CRATON, WESTERN AUSTRALIA: EVIDENCE FOR A HETEROGENEOUS MANTLE PLUME EVENT	CD339W3-1	BASALT	-31.2	121.67	2710	0.906601	47.87	0.63	13.01	9.03	0.15	6.16	8.68	1.59	0.4	0.06	0.68
Superior	THE GEOCHEMISTRY OF NEOARCHEAN (CA. 2700 MA) THOLEIITIC BASALTS, TRANSITIONAL TO ALKALINE BASALTS, AND GABBROS, WAWA SUBPROVINCE, CANADA: IMPLICATIONS FOR PETROGENETIC AND GEODYNAMIC PROCESSES	93-15	BASALT	49	-85.5	2706	0.971038	47.6	2.8	13	15.93	0.2	6	8.9	2.5	0.7	0.4	2.5
Abitibi	THE GEOCHEMISTRY AND EVOLUTION OF THE VOLCANIC ROCKS OF THE CHIBOUGAMAU REGION OF THE ABITIBI METAVOLCANIC BELT	2	BASALT	48	-78	2705	0.999261	49.73	1.24	14.62	12.64		7.39	8.2	2.62	0.13	0.11	0.87
North China Craton	GEOCHEMICAL CHARACTERISTICS OF THE NEOARCHEAN (2800-2700 MA) TAISHAN GREENSTONE BELT, NORTH CHINA CRATON: EVIDENCE FOR PLUME-CRATON INTERACTION	2004-22	BASALT	36.061	117.569	2704	0.978705	51.78	0.33	7.06	9.24	0.19	16.76	12.5	0.77	0.3		0.24
North China Craton	GEOCHEMICAL CHARACTERISTICS OF THE NEOARCHEAN (2800-2700 MA) TAISHAN GREENSTONE BELT, NORTH CHINA CRATON: EVIDENCE FOR PLUME-CRATON INTERACTION	2004-25	BASALT	36.0345	117.6	2704	0.9901	49.57	0.33	9.55	13.09	0.31	11.64	12.32	0.81	0.48		0.26
North China Craton	GEOCHEMICAL CHARACTERISTICS OF THE NEOARCHEAN (2800-2700 MA) TAISHAN GREENSTONE BELT, NORTH CHINA CRATON: EVIDENCE FOR PLUME-CRATON INTERACTION	2004-19	BASALT	36.0612	117.571	2704	0.985318	51.49	0.33	11.69	10.66	0.19	10.77	11.31	1.9	0.18		0.43
Abitibi	QUANTITATIVE TRACE-ELEMENT MODELLING OF THE CRYSTALLIZATION HISTORY OF THE KINOJÉVIS AND BLAKE RIVER GROUPS, ABITIBI GREENSTONE BELT, ONTARIO	F-637	BASALT	48.4	-81.3	2704	0.999813	50.36	0.95	13.99	11.11	0.19	8.13	11.48	1.39	0.19	0.04	0.59
North China Craton	GEOCHEMICAL CHARACTERISTICS OF THE NEOARCHEAN (2800-2700 MA) TAISHAN GREENSTONE BELT, NORTH CHINA CRATON: EVIDENCE FOR PLUME-CRATON INTERACTION	2004-24	BASALT	36.0633	117.573	2704	0.989934	49.65	0.33	15.07	12.32	0.21	7.07	10.72	2.46	0.12		0.71
North China Craton	GEOCHEMICAL CHARACTERISTICS OF THE NEOARCHEAN (2800-2700 MA) TAISHAN GREENSTONE BELT, NORTH CHINA CRATON: EVIDENCE FOR PLUME-CRATON INTERACTION	2004-46B	BASALT	36.4283	117.466	2704	0.982968	51.63	0.33	14.17	11.75	0.2	6.82	9.93	2.74	0.64		0.53
Abitibi	QUANTITATIVE TRACE-ELEMENT MODELLING OF THE CRYSTALLIZATION HISTORY OF THE KINOJÉVIS AND BLAKE RIVER GROUPS, ABITIBI GREENSTONE BELT, ONTARIO	86-6A	BASALT	48.5	-79.03	2704	0.992845	52.45	1.05	16.44	8.55	0.13	6.74	8.56	2.25	0.47	0.04	0.88
North China Craton	GEOCHEMICAL CHARACTERISTICS OF THE NEOARCHEAN (2800-2700 MA) TAISHAN GREENSTONE BELT, NORTH CHINA CRATON: EVIDENCE FOR PLUME-CRATON INTERACTION	2004-46A	BASALT	36.4283	117.466	2704	0.95434	51.72	0.33	14.48	11.66	0.2	6.5	9.79	2.83	0.67		0.61
Yilgarn	PHOSPHORUS AND HIGH FIELD STRENGTH ELEMENT ANOMALIES IN ARCHEAN HIGH-MAGNESIAN MAGMAS AS POSSIBLE INDICATORS OF SOURCE MINERALOGY AND DEPTH	372682	BASALT	-32.2	121.77	2702	0.977847	45.5	0.56	12.1	12.06	0.23	14.8	7.77	1.06	0.09	0.05	0.48
Yilgarn	PHOSPHORUS AND HIGH FIELD STRENGTH ELEMENT ANOMALIES IN ARCHEAN HIGH-MAGNESIAN MAGMAS AS POSSIBLE INDICATORS OF SOURCE MINERALOGY AND DEPTH	372679	BASALT	-32.2	121.77	2702	0.938451	48.4	0.54	11.7	10.98	0.21	12.8	8.2	0.81	0.09	0.05	0.49
esatern Dharwar	BONINITES FROM THE NEOARCHAEAN GADWAL GREENSTONE BELT, EASTERN DHARWAR CRATON, INDIA: IMPLICATIONS FOR ARCHAEAN SUBDUCTION PROCESSES	THOLEIITE	THOLEIITE	15.5	77.5	2702	0.971687	51.62	1.91	12.8	10.72	0.13	6.72	11.03	3.32	0.27	0.3	0.4
Rae Province, Canada	THE ARCHEAN MURMAC BAY GROUP: EVIDENCE FOR A GIANT ARCHEAN RIFT IN THE RAE PROVINCE, CANADA	4700-0024	BASALT	59.6	-109	2700.5	0.999861	48.37	1.27	14.4	12.06	0.191	7.79	10.24	2.03	0.85	0.14	1.25
Western Dharwar	GEOCHEMISTRY OF TWO STRATIGRAPHICALLY-RELATED ULTRAMAFIC (KOMATIITE) LAYERS FROM THE NEOARCHEAN SIGEGUDDA GREENSTONE TERRANE, WESTERN DHARWAR CRATON, INDIA: EVIDENCE FOR COMPOSITIONAL DIVERSITY IN ARCHEAN MANTLE PLUMES	SIG-114	BASALT	13.08	76	2700	0.978158	50.8	0.84	12.13	9.09	0.15	16.9	3.96	0.09	0.05	0.18	0.68
Superior Province	HIGH-PRECISION EXPLORATION GEOCHEMISTRY: APPLICATIONS FOR VOLCANOGENIC MASSIVE SULFIDE DEPOSITS	KC-506-B	THOLEIITE	48.7	-81.4	2700	0.918032	52.55	0.31	15.94	8.8	0.2	12.8	3.79	4.6		0.04	0.4
Western Churchill Province	NEOARCHAEAN VOLCANIC ROCKS, CENTRAL HEARNE SUPRACRUSTAL BELT, WESTERN CHURCHILL PROVINCE, CANADA: GEOCHEMICAL AND ISOTOPIC EVIDENCE SUPPORTING INTRA-OCEANIC SUPRA-SUBDUCTION ZONE EXTENSION	HS541	BASALT	62	-94.5	2700	0.906996	49.3	0.56	14.9	9.36	0.14	9.02	10.76	1	0.04	0.04	0.52
Superior Province	AN ARCHEAN ARC BASALT-NB-ENRICHED BASALT-ADAKITE ASSOCIATION: THE 2.7 GA CONFEDERATION ASSEMBLAGE OF THE BIRCH-UCHI GREENSTONE BELT, SUPERIOR PROVINCE	SL87-05	BASALT	51	-91	2700	0.995555	49.95	0.57	18.02	9.49	0.27	8.57	8.09	3.9	0.05	0.04	0.74
Yilgarn, WESTERN AUSTRALIA	ARCHEAN BASIC VOLCANISM IN THE EASTERN GOLDFIELDS PROVINCE, YILGARN BLOCK, WESTERN AUSTRALIA	12	BASALT	-31.7	121.67	2700	0.992729	51.1	0.72	14.9	10.13	0.18	7.77	11.93	1.48	0.08	0.06	0.43
Pilbara	A COMPARATIVE STUDY OF THE GEOCHEMICAL AND ISOTOPIC SYSTEMATICS OF LATE ARCHEAN FLOOD BASALTS FROM THE PILBARA AND KAAPVAAL CRATONS	GSWA100529	BASALT	-25.87	24.73	2700	0.938638	52.1	0.64	12.8	9.8	0.18	7.56	9.57	2.7	0.58	0.07	0.86
Superior	GEOCHEMICAL EVOLUTION IN THE BLAKE RIVER GROUP, ABITIBI GREENSTONE BELT, SUPERIOR PROVINCE	603	THOLEIITE	48.28	-80.23	2699.5	0.998621	50.15	0.33	14.74	9.67	0.13	8.46	10.68	1.87	0.51	0.04	0.68
Superior	GEOCHEMICAL EVOLUTION IN THE BLAKE RIVER GROUP, ABITIBI GREENSTONE BELT, SUPERIOR PROVINCE	596	BASALT	48.28	-80.23	2699.5	0.997454	52.97	0.33	14.17	9.67	0.14	8.43	4.39	3.74	0.45	0.17	0.95
Superior	GEOCHEMICAL EVOLUTION IN THE BLAKE RIVER GROUP, ABITIBI GREENSTONE BELT, SUPERIOR PROVINCE	594	BASALT	48.28	-80.23	2699.5	0.993043	50.39	0.33	13.77	11.13	0.2	7.34	9	2.8	0.76	0.07	0.78
Superior	GEOCHEMICAL EVOLUTION IN THE BLAKE RIVER GROUP, ABITIBI GREENSTONE BELT, SUPERIOR PROVINCE	593	BASALT	48.28	-80.23	2699.5	0.994917	50.29	0.33	16.9	9.76	0.15	7.29	4.15	4.41	0.09	0.2	1.3
Superior	GEOCHEMICAL EVOLUTION IN THE BLAKE RIVER GROUP, ABITIBI GREENSTONE BELT, SUPERIOR PROVINCE	592	BASALT	48.28	-80.23	2699.5	0.994825	47.49	0.33	15.43	9.61	0.18	6.63	12.43	2.15	0.16	0.43	1.8
Abitibi, CANADA	ARCHEAN SHOSHONITES FROM THE ABITIBI GREENSTONE BELT, CHIBOUGAMU /QUEBEC, CANADA): GEOCHEMISTRY AND TECTONIC SETTING	JW-15	ANDESITE	49.87	-74.35	2697.5	0.997485	51.74	0.8	12.91	7.31	0.14	6.43	7.23	3.08	0.8	0.26	1.35
Abitibi, CANADA	ARCHEAN SHOSHONITES FROM THE ABITIBI GREENSTONE BELT, CHIBOUGAMU /QUEBEC, CANADA): GEOCHEMISTRY AND TECTONIC SETTING	JW-18	BASALT	49.87	-74.35	2697.5	0.948269	53.86	0.5	12.96	5.52	0.13	6.42	7.19	4.4	0.5	0.46	2.01
Yilgarn Craton	ELEMENTAL AND ND-ISOTOPE SYSTEMATICS OF THE UPPER BASALT UNIT, 2.7 GA KAMBALDA SEQUENCE: QUANTITATIVE MODELING OF PROGRESSIVE CRUSTAL CONTAMINATION OF PLUME ASTHENOSPHERE	OB1	BASALT	-30.3075	120.993	2697	0.938821	46.64	0.41	11.21	9.96	0.21	16.65	9	1.23	0.07	0.04	0.29
Yilgarn Craton	ELEMENTAL AND ND-ISOTOPE SYSTEMATICS OF THE UPPER BASALT UNIT, 2.7 GA KAMBALDA SEQUENCE: QUANTITATIVE MODELING OF PROGRESSIVE CRUSTAL CONTAMINATION OF PLUME ASTHENOSPHERE	13181	BASALT	-30.2593	120.907	2697	0.968349	49.68	0.5	14.09	10.05	0.19	10.77	8.71	2.27	0.16	0.05	0.43
Yilgarn Craton	ELEMENTAL AND ND-ISOTOPE SYSTEMATICS OF THE UPPER BASALT UNIT, 2.7 GA KAMBALDA SEQUENCE: QUANTITATIVE MODELING OF PROGRESSIVE CRUSTAL CONTAMINATION OF PLUME ASTHENOSPHERE	687-3	BASALT	-31.3792	121.774	2697	0.911074	52.81	0.67	14.53	8.8	0.15	6.57	10.51	3.57	0.55	0.08	0.63
Dharwar Craton	PETROGENESIS OF AMPHIBOLITES IN THE KOLAR SCHIST BELT, INDIA - A PRELIMINARY REPORT	45948	BASALT	13.13	78.13	2696	0.995125	45.05	1.3	11.89	14.16	0.23	14.97	10.79	0.7	0.06		1.12
Dharwar Craton	PETROGENESIS OF AMPHIBOLITES IN THE KOLAR SCHIST BELT, INDIA - A PRELIMINARY REPORT	45760	BASALT	13.13	78.13	2696	0.99909	46.43	1.17	11.67	14.02	0.17	14.06	10.88	0.86	0.14		1.1
Yilgarn, WESTERN AUSTRALIA	ARCHAEAN MAFIC MAGMATISM IN THE KALGOORLIE AREA OF THE YILGARN CRATON, WESTERN AUSTRALIA: A GEOCHEMICAL AND ND ISOTOPIC STUDY OF THE PETROGENETIC AND TECTONIC EVOLUTION OF A GREENSTONE BELT	K354	THOLEIITE	-30.75	121.45	2696	0.915584	49.52	0.57	10.94	10.18	0.21	13.57	7.2	2.21	0.07	0.09	0.52
Dharwar Craton	GEOCHEMISTRY AND PETROGENESIS OF AMPHIBOLITES, KOLAR SCHIST BELT, SOUTH INDIA: EVIDENCE FOR KOMATIITE MAGMA DERIVED BY LOW PERCENTAGES OF MELTING OF THE MANTLE	45860	THOLEIITE	13.13	78.13	2696	0.995204	48.22	0.91	15.31	11.36	0.17	10.26	11.34	1.61	0.08		0.72
Dharwar Craton	GEOCHEMISTRY AND PETROGENESIS OF AMPHIBOLITES, KOLAR SCHIST BELT, SOUTH INDIA: EVIDENCE FOR KOMATIITE MAGMA DERIVED BY LOW PERCENTAGES OF MELTING OF THE MANTLE	45799	THOLEIITE	13.13	78.13	2696	0.971928	51.04	0.86	15.11	11.32	0.2	7.76	10.36	2.33	0.1		0.81
Dharwar Craton	GEOCHEMISTRY AND PETROGENESIS OF DOLERITE DYKES IN AND AROUND KOLAR SCHIST BELT, SOUTH INDIA	KGF7	THOLEIITE	13.13	78.13	2696	0.998597	48.72	1.08	13.97	13.25	0.22	7.62	10.6	2.29	0.39	0.08	1.64
Dharwar Craton	GEOCHEMISTRY AND PETROGENESIS OF DOLERITE DYKES IN AND AROUND KOLAR SCHIST BELT, SOUTH INDIA	KGF1	THOLEIITE	13.13	78.13	2696	0.997586	50.3	1.07	13.85	15.37	0.23	7.62	8.7	2.29	0.28	0.06	1.43
Dharwar Craton	GEOCHEMISTRY AND PETROGENESIS OF AMPHIBOLITES, KOLAR SCHIST BELT, SOUTH INDIA: EVIDENCE FOR KOMATIITE MAGMA DERIVED BY LOW PERCENTAGES OF MELTING OF THE MANTLE	18-14	THOLEIITE	13.13	78.13	2696	0.984921	50.59	1.15	14.74	12.3	0.16	7.2	11.29	1.99	0.07		1.07
Dharwar Craton	PETROGENESIS OF AMPHIBOLITES IN THE KOLAR SCHIST BELT, INDIA - A PRELIMINARY REPORT	18-14	BASALT	13.13	78.13	2696	0.999404	50.74	1.14	14.79	12.47	0.15	7.17	11.81	2.01	0.07		1.08
Yilgarn, WESTERN AUSTRALIA	ARCHAEAN MAFIC MAGMATISM IN THE KALGOORLIE AREA OF THE YILGARN CRATON, WESTERN AUSTRALIA: A GEOCHEMICAL AND ND ISOTOPIC STUDY OF THE PETROGENETIC AND TECTONIC EVOLUTION OF A GREENSTONE BELT	K374	BASALT	-30.75	121.45	2696	0.913497	47.84	0.62	13.57	8.95	0.19	7.17	12.3	2.3	0.01	0.08	0.65
Dharwar Craton	GEOCHEMISTRY AND PETROGENESIS OF AMPHIBOLITES, KOLAR SCHIST BELT, SOUTH INDIA: EVIDENCE FOR KOMATIITE MAGMA DERIVED BY LOW PERCENTAGES OF MELTING OF THE MANTLE	45824	THOLEIITE	13.13	78.13	2696	0.983952	50.55	0.77	14.37	10.95	0.2	7	11.61	1.88	0.12		0.73
Yilgarn, WESTERN AUSTRALIA	ARCHAEAN MAFIC MAGMATISM IN THE KALGOORLIE AREA OF THE YILGARN CRATON, WESTERN AUSTRALIA: A GEOCHEMICAL AND ND ISOTOPIC STUDY OF THE PETROGENETIC AND TECTONIC EVOLUTION OF A GREENSTONE BELT	K372	BASALT	-30.75	121.45	2696	0.934394	46.48	0.62	13.21	8.88	0.21	6.99	9.75	2.98	0.02	0.08	0.55
Dharwar Craton	GEOCHEMISTRY AND PETROGENESIS OF AMPHIBOLITES, KOLAR SCHIST BELT, SOUTH INDIA: EVIDENCE FOR KOMATIITE MAGMA DERIVED BY LOW PERCENTAGES OF MELTING OF THE MANTLE	13-5/79	THOLEIITE	13.13	78.13	2696	0.985124	52.32	0.81	14.86	9.9	0.2	6.98	11.91	2.05	0.08		0.69
Dharwar Craton	GEOCHEMISTRY AND PETROGENESIS OF DOLERITE DYKES IN AND AROUND KOLAR SCHIST BELT, SOUTH INDIA	KGF3B	THOLEIITE	13.13	78.13	2696	0.989309	51.24	1.31	13.95	16.01	0.21	6.88	9.45	2.45	0.4	0.07	1.86
Dharwar Craton	GEOCHEMISTRY AND PETROGENESIS OF AMPHIBOLITES, KOLAR SCHIST BELT, SOUTH INDIA: EVIDENCE FOR KOMATIITE MAGMA DERIVED BY LOW PERCENTAGES OF MELTING OF THE MANTLE	13-5C	THOLEIITE	13.13	78.13	2696	0.995595	51.27	1.16	15.26	11.67	0.19	6.88	11.81	0.95	0.16		1.01
Dharwar Craton	PETROGENESIS OF AMPHIBOLITES IN THE KOLAR SCHIST BELT, INDIA - A PRELIMINARY REPORT	45885	THOLEIITE	13.13	78.13	2696	0.999513	51.27	0.72	16.6	10.33	0.18	6.83	11.82	1.79	0.07		0.71
Dharwar Craton	GEOCHEMISTRY AND PETROGENESIS OF AMPHIBOLITES, KOLAR SCHIST BELT, SOUTH INDIA: EVIDENCE FOR KOMATIITE MAGMA DERIVED BY LOW PERCENTAGES OF MELTING OF THE MANTLE	45885	THOLEIITE	13.13	78.13	2696	0.995812	51.27	0.72	16.6	10.33	0.18	6.83	11.82	1.79	0.07		0.71
Dharwar Craton	GEOCHEMISTRY AND PETROGENESIS OF AMPHIBOLITES, KOLAR SCHIST BELT, SOUTH INDIA: EVIDENCE FOR KOMATIITE MAGMA DERIVED BY LOW PERCENTAGES OF MELTING OF THE MANTLE	45984	THOLEIITE	13.13	78.13	2696	0.999721	53.53	0.89	15.76	9.3	0.24	6.56	12.81	0.86	0.05		0.91
Dharwar Craton	GEOCHEMISTRY AND PETROGENESIS OF AMPHIBOLITES, KOLAR SCHIST BELT, SOUTH INDIA: EVIDENCE FOR KOMATIITE MAGMA DERIVED BY LOW PERCENTAGES OF MELTING OF THE MANTLE	45889	THOLEIITE	13.13	78.13	2696	0.999222	53.83	1.01	14.57	9.89	0.16	6.24	12.13	0.7	0.03		0.86
Dharwar Craton	GEOCHEMISTRY AND PETROGENESIS OF DOLERITE DYKES IN AND AROUND KOLAR SCHIST BELT, SOUTH INDIA	KGF9A	THOLEIITE	13.13	78.13	2696	0.993336	49.1	1.45	13.37	17.88	0.22	6.21	8.3	2.21	0.36	0.07	2.45
Slave Province	DEVELOPMENT OF AN ANCIENT BACK-ARC BASIN OVERLYING CONTINENTAL CRUST: THE ARCHEAN PELTIER FORMATION, NORTHWEST TERRITORIES, CANADA	L6-9B	basalt	65.25	-113.53	2680	0.974146	48.14	0.58	15.34	10.55	0.19	8.81	7.79	3.11	0.4	0.04	0.56
Slave Province	DEVELOPMENT OF AN ANCIENT BACK-ARC BASIN OVERLYING CONTINENTAL CRUST: THE ARCHEAN PELTIER FORMATION, NORTHWEST TERRITORIES, CANADA	L6-6B	THOLEIITE	65.25	-113.53	2680	0.926749	45.98	0.9	14.47	11.32	0.21	8.73	11.31	1.65	0.08	0.06	0.74
Slave Province	DEVELOPMENT OF AN ANCIENT BACK-ARC BASIN OVERLYING CONTINENTAL CRUST: THE ARCHEAN PELTIER FORMATION, NORTHWEST TERRITORIES, CANADA	C6-77	basalt	65.25	-113.53	2680	0.961321	47.24	1.11	15.37	12.42	0.2	8.26	4.51	2.22	3.02	0.07	1.06
Slave Province	DEVELOPMENT OF AN ANCIENT BACK-ARC BASIN OVERLYING CONTINENTAL CRUST: THE ARCHEAN PELTIER FORMATION, NORTHWEST TERRITORIES, CANADA	L6-11	THOLEIITE	65.25	-113.53	2680	0.96853	48	1.08	13.97	12.31	0.21	6.97	7.76	2.44	1.13	0.08	0.84
Slave Province	DEVELOPMENT OF AN ANCIENT BACK-ARC BASIN OVERLYING CONTINENTAL CRUST: THE ARCHEAN PELTIER FORMATION, NORTHWEST TERRITORIES, CANADA	L6-10B	basalt	65.25	-113.53	2680	0.991076	48.62	0.88	14.95	11.3	0.19	6.88	10.29	2.14	0.46	0.06	0.74
Zimbabwe	THE GEOCHEMISTRY OF ULTRAMAFIC TO MAFIC VOLCANICS FROM THE BELINGWE GREENSTONE BELT, ZIMBABWE: MAGMATISM IN THE ARCHEAN CONTINENTAL LARGE IGNEOUS PROVINCE	BX108	BASALT	-20.35	30.03	2672	0.982678	51.04	0.55	11.27	9.95	0.18	11.48	8.54	2.84	0.023	0.051	0.5
Zimbabwe	THE GEOCHEMISTRY OF ULTRAMAFIC TO MAFIC VOLCANICS FROM THE BELINGWE GREENSTONE BELT, ZIMBABWE: MAGMATISM IN THE ARCHEAN CONTINENTAL LARGE IGNEOUS PROVINCE	BW495	BASALT	-20.35	30.03	2672	0.971614	53.14	0.55	11.51	9.25	0.14	11.26	7.16	3.04	0.03	0.051	0.45
Zimbabwe	THE GEOCHEMISTRY OF ULTRAMAFIC TO MAFIC VOLCANICS FROM THE BELINGWE GREENSTONE BELT, ZIMBABWE: MAGMATISM IN THE ARCHEAN CONTINENTAL LARGE IGNEOUS PROVINCE	BX235	BASALT	-20.33	30.03	2672	0.995221	52.19	0.53	14.24	8.29	0.14	9	7.51	3.95	0.015	0.049	0.49
Zimbabwe	THE GEOCHEMISTRY OF ULTRAMAFIC TO MAFIC VOLCANICS FROM THE BELINGWE GREENSTONE BELT, ZIMBABWE: MAGMATISM IN THE ARCHEAN CONTINENTAL LARGE IGNEOUS PROVINCE	BX240	BASALT	-20.33	30.03	2672	0.981169	47.73	0.75	14.67	11.09	0.19	8.43	11.73	1.28	0.15	0.064	0.68
Zimbabwe	THE GEOCHEMISTRY OF ULTRAMAFIC TO MAFIC VOLCANICS FROM THE BELINGWE GREENSTONE BELT, ZIMBABWE: MAGMATISM IN THE ARCHEAN CONTINENTAL LARGE IGNEOUS PROVINCE	BX252	BASALT	-20.33	30.03	2672	0.999278	48.56	0.74	14.48	10.99	0.19	8.36	11.66	1.67	0.046	0.059	0.73
Zimbabwe	THE GEOCHEMISTRY OF ULTRAMAFIC TO MAFIC VOLCANICS FROM THE BELINGWE GREENSTONE BELT, ZIMBABWE: MAGMATISM IN THE ARCHEAN CONTINENTAL LARGE IGNEOUS PROVINCE	BX119	BASALT	-20.33	30.03	2672	0.927029	51.8	0.56	13.81	9.28	0.16	8.26	10.85	1.68	0.088	0.044	0.49
Zimbabwe	THE GEOCHEMISTRY OF ULTRAMAFIC TO MAFIC VOLCANICS FROM THE BELINGWE GREENSTONE BELT, ZIMBABWE: MAGMATISM IN THE ARCHEAN CONTINENTAL LARGE IGNEOUS PROVINCE	BX248	BASALT	-20.33	30.03	2672	0.971229	48.72	0.73	14.26	10.9	0.19	7.48	13.46	0.82	0.093	0.059	0.66
Zimbabwe	THE GEOCHEMISTRY OF ULTRAMAFIC TO MAFIC VOLCANICS FROM THE BELINGWE GREENSTONE BELT, ZIMBABWE: MAGMATISM IN THE ARCHEAN CONTINENTAL LARGE IGNEOUS PROVINCE	BX153	BASALT	-20.33	30.03	2672	0.998459	50.25	1.25	13.79	11.82	0.26	6.2	10.85	1.68	0.1	0.11	1.04
Slave Province	GEOCHEMISTRY OF THE LATE ARCHEAN BANTING GROUP, YELLOWKNIFE GREENSTONE BELT, SLAVE PROVINCE, CANADA: SIMULTANEOUS MELTING OF THE UPPER MANTLE AND JUVENILE MAFIC CRUST	96-YK-14	basalt	62.5	-114.5	2660	0.981695	48.33	0.95	15.09	12.1	0.2	6.72	9.58	2.11	0.18	0.08	1.04
Slave Province	GEOCHEMISTRY OF THE LATE ARCHEAN BANTING GROUP, YELLOWKNIFE GREENSTONE BELT, SLAVE PROVINCE, CANADA: SIMULTANEOUS MELTING OF THE UPPER MANTLE AND JUVENILE MAFIC CRUST	98-YK-10	basalt	62.5	-114.5	2660	0.984384	50.95	1.04	15.81	10.51	0.16	6.48	8.46	2.55	0.08	0.11	1.11
Southern Bastar Craton	PETROLOGY AND GEOCHEMISTRY OF THE LATE ARCHAEAN SILICEOUS HIGH-MAGNESIAN BASALTS (SHMB) FROM KAKLUR, SOUTHERN BASTAR CRATON, CENTRAL INDIA	279	BASALT	18.9242	81.6096	2594.5	0.963463	52.83	0.35	10.35	10.12	0.18	15.57	6.54	1.08	0.71	0.05	0.42
Dhawar	GEOCHEMISTRY OF THE METAVOLCANICS OF THE HUTTI-MASKI SCHIST BELT, SOUTH INDIA: IMPLICATIONS TO GOLD METALLOGENY IN THE EASTERN DHARWAR CRATON	GH-17	BASALT	15.67	76.58	2586	0.999472	48.8	0.73	11.5	10.1	0.19	10.5	12.6	1.7	0.94		1.11
Dhawar	GEOCHEMISTRY OF THE METAVOLCANICS OF THE HUTTI-MASKI SCHIST BELT, SOUTH INDIA: IMPLICATIONS TO GOLD METALLOGENY IN THE EASTERN DHARWAR CRATON	GH-7	BASALT	15.67	76.58	2586	0.994257	49.7	1.3	12.8	13.2	0.18	9.33	10.4	2	0.36		1.89
Dhawar	GEOCHEMISTRY OF THE METAVOLCANICS OF THE HUTTI-MASKI SCHIST BELT, SOUTH INDIA: IMPLICATIONS TO GOLD METALLOGENY IN THE EASTERN DHARWAR CRATON	GH-10	BASALT	15.67	76.58	2586	0.949299	48.4	0.74	16	10.8	0.18	9.33	12.5	1.9	0.37		0.69
Karnataka	RARE EARTH ELEMENT GEOCHEMISTRY OF METABASALTS FROM KOLAR AND HUTTI GOLD-BEARING VOLCANIC BELTS, KARNATAKA CRATON, INDIA	3	BASALT	13.13	78.13	2586	0.987031	49.35	0.75	12.21	13.31	0.21	8.95	10.61	2.23	0.18	0.15	0.2
Dhawar	GEOCHEMISTRY OF THE METAVOLCANICS OF THE HUTTI-MASKI SCHIST BELT, SOUTH INDIA: IMPLICATIONS TO GOLD METALLOGENY IN THE EASTERN DHARWAR CRATON	GH-16	BASALT	15.67	76.58	2586	0.999457	45.3	0.73	13.5	12.4	0.27	8.53	8.43	0.95	0.12		0.35
Dhawar	GEOCHEMISTRY OF THE METAVOLCANICS OF THE HUTTI-MASKI SCHIST BELT, SOUTH INDIA: IMPLICATIONS TO GOLD METALLOGENY IN THE EASTERN DHARWAR CRATON	GH-11	BASALT	15.67	76.58	2586	0.955758	45.5	1.33	15.5	13.5	0.21	7.9	12.5	1.96	0.25		0.98
Dhawar	GEOCHEMISTRY OF THE METAVOLCANICS OF THE HUTTI-MASKI SCHIST BELT, SOUTH INDIA: IMPLICATIONS TO GOLD METALLOGENY IN THE EASTERN DHARWAR CRATON	GH-5	BASALT	15.67	76.58	2586	0.999543	48.2	1.25	15.8	13.4	0.2	7.45	11.9	2.15	0.2		0.75
Dhawar	GEOCHEMISTRY OF THE METAVOLCANICS OF THE HUTTI-MASKI SCHIST BELT, SOUTH INDIA: IMPLICATIONS TO GOLD METALLOGENY IN THE EASTERN DHARWAR CRATON	GH-12	BASALT	15.67	76.58	2586	0.967057	46.2	1.22	15	13.1	0.2	7.35	11.7	1.8	0.28		0.94
Karnataka	RARE EARTH ELEMENT GEOCHEMISTRY OF METABASALTS FROM KOLAR AND HUTTI GOLD-BEARING VOLCANIC BELTS, KARNATAKA CRATON, INDIA	6	BASALT	16.15	76.65	2586	0.998336	51.01	0.69	13.3	12.42	0.22	7.03	10.62	1.82	0.33	0.13	0.64
Karnataka	RARE EARTH ELEMENT GEOCHEMISTRY OF METABASALTS FROM KOLAR AND HUTTI GOLD-BEARING VOLCANIC BELTS, KARNATAKA CRATON, INDIA	5	BASALT	16.15	76.65	2586	0.984304	50.36	0.82	13.22	13.26	0.16	7	10.05	2.24	0.3	0.19	0.68
Dhawar	GEOCHEMISTRY OF THE METAVOLCANICS OF THE HUTTI-MASKI SCHIST BELT, SOUTH INDIA: IMPLICATIONS TO GOLD METALLOGENY IN THE EASTERN DHARWAR CRATON	GH-4	BASALT	15.67	76.58	2586	0.908516	49.1	1.3	15	13	0.19	6.83	12.2	2.1	0.2		0.98
Karnataka	RARE EARTH ELEMENT GEOCHEMISTRY OF METABASALTS FROM KOLAR AND HUTTI GOLD-BEARING VOLCANIC BELTS, KARNATAKA CRATON, INDIA	2	BASALT	13.13	78.13	2586	0.999855	51.02	0.69	12.19	12.52	0.14	6.7	11.23	2.17	0.12	0.14	1.5
Dhawar	GEOCHEMISTRY OF THE METAVOLCANICS OF THE HUTTI-MASKI SCHIST BELT, SOUTH INDIA: IMPLICATIONS TO GOLD METALLOGENY IN THE EASTERN DHARWAR CRATON	HG-5B	BASALT	15.67	76.58	2586	0.997699	50	0.99	12.6	12.1	0.18	6.3	9.07	1.9	0.29		0.94
Dhawar	GEOCHEMISTRY OF THE METAVOLCANICS OF THE HUTTI-MASKI SCHIST BELT, SOUTH INDIA: IMPLICATIONS TO GOLD METALLOGENY IN THE EASTERN DHARWAR CRATON	GH-13	BASALT	15.67	76.58	2586	0.99126	45.1	1.01	14.5	11.4	0.17	6.05	11.5	1.3	0.27		0.75
Central Gawler Craton	PROVENANCE AND TECTONIC DEVELOPMENT OF THE LATE ARCHAEAN GAWLER CRATON, AUSTRALIA; U-PB ZIRCON, GEOCHEMICAL AND SM-ND ISOTOPIC IMPLICATIONS	613125	BASALT	-29.8	135.8	2553	0.993456	47.4	0.35	14	8.15	0.17	7.45	7.87	2.53	0.78	0.03	0.41
North China Craton	A MORB-ARC BASALT-ADAKITE ASSOCIATION IN THE 2.5 GA WUTAI GREENSTONE BELT: LATE ARCHEAN MAGMATISM AND CRUSTAL GROWTH IN THE NORTH CHINA CRATON	WR20	BASALT	38.5	113	2543	0.97248	45.3	0.82	14.56	11.3	0.2	12.3	5.36	0.66	4.01	0.08	0.8
North China Craton	A MORB-ARC BASALT-ADAKITE ASSOCIATION IN THE 2.5 GA WUTAI GREENSTONE BELT: LATE ARCHEAN MAGMATISM AND CRUSTAL GROWTH IN THE NORTH CHINA CRATON	WR21	BASALT	38.5	113	2543	0.978092	47.99	0.97	15.45	11.36	0.22	9.1	7.81	1.83	1.51	0.09	0.76
North China Craton	A MORB-ARC BASALT-ADAKITE ASSOCIATION IN THE 2.5 GA WUTAI GREENSTONE BELT: LATE ARCHEAN MAGMATISM AND CRUSTAL GROWTH IN THE NORTH CHINA CRATON	WR13	BASALT	38.5	113	2543	0.971538	49.52	0.77	13.86	12.49	0.22	7.82	10.73	1.13	0.49	0.07	0.62
North China Craton	A MORB-ARC BASALT-ADAKITE ASSOCIATION IN THE 2.5 GA WUTAI GREENSTONE BELT: LATE ARCHEAN MAGMATISM AND CRUSTAL GROWTH IN THE NORTH CHINA CRATON	WR10	BASALT	38.5	113	2543	0.955033	49.65	0.74	14.08	12.29	0.25	7.5	10.76	1.61	0.58	0.07	0.56
North China Craton	A MORB-ARC BASALT-ADAKITE ASSOCIATION IN THE 2.5 GA WUTAI GREENSTONE BELT: LATE ARCHEAN MAGMATISM AND CRUSTAL GROWTH IN THE NORTH CHINA CRATON	WR15	BASALT	38.5	113	2543	0.970388	49.09	0.81	13.93	14.77	0.24	7.4	10.27	1.53	0.66	0.08	0.6
North China Craton	A MORB-ARC BASALT-ADAKITE ASSOCIATION IN THE 2.5 GA WUTAI GREENSTONE BELT: LATE ARCHEAN MAGMATISM AND CRUSTAL GROWTH IN THE NORTH CHINA CRATON	WR9	BASALT	38.5	113	2543	0.959673	49.76	0.81	14.13	12.26	0.24	7.39	10.53	1.53	0.69	0.1	0.59
North China Craton	A MORB-ARC BASALT-ADAKITE ASSOCIATION IN THE 2.5 GA WUTAI GREENSTONE BELT: LATE ARCHEAN MAGMATISM AND CRUSTAL GROWTH IN THE NORTH CHINA CRATON	WS30	BASALT	38.5	113	2543	0.982981	50.32	1.04	14.65	11.26	0.21	7.01	8.87	2.38	0.41	0.04	0.63
North China Craton	A MORB-ARC BASALT-ADAKITE ASSOCIATION IN THE 2.5 GA WUTAI GREENSTONE BELT: LATE ARCHEAN MAGMATISM AND CRUSTAL GROWTH IN THE NORTH CHINA CRATON	WS59	BASALT	38.5	113	2543	0.923941	50.09	0.9	13.35	12.64	0.23	6.76	10.45	1.14	0.4	0.08	0.89
North China Craton	A MORB-ARC BASALT-ADAKITE ASSOCIATION IN THE 2.5 GA WUTAI GREENSTONE BELT: LATE ARCHEAN MAGMATISM AND CRUSTAL GROWTH IN THE NORTH CHINA CRATON	WR22	BASALT	38.5	113	2543	0.9817	49.37	1.17	15.16	12	0.21	6.65	7.52	0.95	2.61	0.15	1.1
North China Craton	A MORB-ARC BASALT-ADAKITE ASSOCIATION IN THE 2.5 GA WUTAI GREENSTONE BELT: LATE ARCHEAN MAGMATISM AND CRUSTAL GROWTH IN THE NORTH CHINA CRATON	WS13	BASALT	38.5	113	2543	0.998713	53.26	0.86	14.83	10.23	0.2	6.48	8.31	2.83	0.57	0.1	0.7
North China Craton	A MORB-ARC BASALT-ADAKITE ASSOCIATION IN THE 2.5 GA WUTAI GREENSTONE BELT: LATE ARCHEAN MAGMATISM AND CRUSTAL GROWTH IN THE NORTH CHINA CRATON	WS61	BASALT	38.5	113	2543	0.999254	53.68	0.85	13.58	10.67	0.21	6.42	8.31	1.97	1.25	0.27	1.03
North China Craton	GEOCHEMISTRY OF NEOARCHEAN (CA. 2.55-2.50 GA) VOLCANIC AND OPHIOLITIC ROCKS IN THE WUTAISHAN GREENSTONE BELT, CENTRAL OROGENIC BELT, NORTH CHINA CRATON: IMPLICATIONS FPR GEODYNAMIC SETTING AND CONTINENTAL GROWTH	2002-64A	BASALT	38.8689	113.714	2525	0.997932	50.6	0.97	15.58	10.37	0.2	7.64	9.67	2.95	0.77	0.1	0.88
North China Craton	GEOCHEMISTRY OF NEOARCHEAN (CA. 2.55-2.50 GA) VOLCANIC AND OPHIOLITIC ROCKS IN THE WUTAISHAN GREENSTONE BELT, CENTRAL OROGENIC BELT, NORTH CHINA CRATON: IMPLICATIONS FPR GEODYNAMIC SETTING AND CONTINENTAL GROWTH	2002-63	BASALT	38.8669	113.714	2525	0.965264	50.6	1.23	15.42	11.85	0.19	6.8	9.48	1.94	1.02	0.14	1.15
Himalayan belt	SM-ND AGE AND PETROGENESIS OF RAMPUR METAVOLCANIC ROCKS, NW HIMALAYAS: LATE ARCHAEAN RELICS IN THE HIMALAYAN BELT	Rj6	THOLEIITE	31	77	2510	0.951163	53.71	0.81	15.29	8.7	0.15	6.46	7.02	3.29	1.68	0.1	0.96
Himalayan belt	SM-ND AGE AND PETROGENESIS OF RAMPUR METAVOLCANIC ROCKS, NW HIMALAYAS: LATE ARCHAEAN RELICS IN THE HIMALAYAN BELT	Rj2	THOLEIITE	31	77	2510	0.951197	51.28	1.02	14.48	10.88	0.2	6.05	8.1	3.2	2.27	0.18	0.95

## Sheet: La-Yb
Craton	REFERENCE	SAMPLE_ID	ROCK_NAME	LATITUDE	LONGITUDE	C_AGE	Arc_probability3	SIO2	TIO2	AL2O3	FEOT	MNO	MGO	CAO	NA2O	K2O	P2O5	LA	YB
western superior province	PLUME MAGMATISM AND CRUSTAL GROWTH AT 2.9 TO 3.0 GA IN THE STEEP ROCK AND LUMBY LAKE AREA, WESTERN SUPERIOR PROVINCE	96KYT18	BASALT	49	-91	2986	0.995833	49.93	1.39	12.36	8.46	0.15	11.49	8.48	3.07	1.01	0.3	19.96	1.23
Superior	USING SEDIMENT GEOCHEMISTRY AND DETRITAL ZIRCON GEOCHRONOLOGY TO CATEGORIZE ERODED IGNEOUS UNITS: AN EXAMPLE FROM THE MESOARCHEAN BIRCH-UCHI GREENSTONE BELT, SUPERIOR PROVINCE	BA-5	BASALT	51.1	-92.6	2975	0.986586	49.96	0.85	4.31	14.19	0.22	15.55	12.81	0.36	0.12	0.05	3.61	0.99
SW Greenland	TRACE ELEMENT SYSTEMATICS OF THE NEOARCHEAN FISKENÆSSET ANORTHOSITE COMPLEX AND ASSOCIATED META-VOLCANIC ROCKS, SW GREENLAND: EVIDENCE FOR A MAGMATIC ARC ORIGIN	497131	BASALT	63.201	-49.2789	2973	0.911378	46.9	1.17	16.2	12.78	0.2	8	10.1	2.9	0.2	0.09	3.4	2.63
SW Greenland	TRACE ELEMENT SYSTEMATICS OF THE NEOARCHEAN FISKENÆSSET ANORTHOSITE COMPLEX AND ASSOCIATED META-VOLCANIC ROCKS, SW GREENLAND: EVIDENCE FOR A MAGMATIC ARC ORIGIN	478864	BASALT	63.1264	-50.3014	2973	0.989454	49.6	1.08	14.2	13.23	0.22	7.8	9.8	2	0.4	0.08	3.5	2.52
SW Greenland	TRACE ELEMENT SYSTEMATICS OF THE NEOARCHEAN FISKENÆSSET ANORTHOSITE COMPLEX AND ASSOCIATED META-VOLCANIC ROCKS, SW GREENLAND: EVIDENCE FOR A MAGMATIC ARC ORIGIN	478862	BASALT	63.1261	-50.3003	2973	0.990081	48.7	0.97	14.9	12.42	0.2	8.3	11.3	1.5	0.2	0.08	2.75	2.24
SW Greenland	TRACE ELEMENT SYSTEMATICS OF THE NEOARCHEAN FISKENÆSSET ANORTHOSITE COMPLEX AND ASSOCIATED META-VOLCANIC ROCKS, SW GREENLAND: EVIDENCE FOR A MAGMATIC ARC ORIGIN	478857	BASALT	63.1258	-50.2969	2973	0.990024	48.8	0.9	14.8	12.51	0.19	8.2	11.4	1.6	0.3	0.07	2.53	2.2
SW Greenland	TRACE ELEMENT SYSTEMATICS OF THE NEOARCHEAN FISKENÆSSET ANORTHOSITE COMPLEX AND ASSOCIATED META-VOLCANIC ROCKS, SW GREENLAND: EVIDENCE FOR A MAGMATIC ARC ORIGIN	478811	BASALT	63.1367	-50.6175	2973	0.903792	47.3	0.9	15.2	11.34	0.22	6.7	15.1	1.7	0.3	0.06	2.61	2.09
SW Greenland	TRACE ELEMENT SYSTEMATICS OF THE NEOARCHEAN FISKENÆSSET ANORTHOSITE COMPLEX AND ASSOCIATED META-VOLCANIC ROCKS, SW GREENLAND: EVIDENCE FOR A MAGMATIC ARC ORIGIN	497124	BASALT	63.0195	-49.4662	2973	0.984773	47	0.77	16.1	10.62	0.26	6.8	15.1	1.8	0.4	0.06	2.13	1.91
SW Greenland	TRACE ELEMENT SYSTEMATICS OF THE NEOARCHEAN FISKENÆSSET ANORTHOSITE COMPLEX AND ASSOCIATED META-VOLCANIC ROCKS, SW GREENLAND: EVIDENCE FOR A MAGMATIC ARC ORIGIN	478813	BASALT	63.1283	-50.6133	2973	0.985762	47.4	0.65	14.5	11.79	0.17	7	15.5	1.5	0.2	0.05	2.48	1.81
SW Greenland	TRACE ELEMENT SYSTEMATICS OF THE NEOARCHEAN FISKENÆSSET ANORTHOSITE COMPLEX AND ASSOCIATED META-VOLCANIC ROCKS, SW GREENLAND: EVIDENCE FOR A MAGMATIC ARC ORIGIN	497109	BASALT	63.0234	-49.4691	2973	0.975309	48.4	0.73	15.9	11.61	0.19	7.8	12.1	1.9	0.1	0.05	1.74	1.76
SW Greenland	TRACE ELEMENT SYSTEMATICS OF THE NEOARCHEAN FISKENÆSSET ANORTHOSITE COMPLEX AND ASSOCIATED META-VOLCANIC ROCKS, SW GREENLAND: EVIDENCE FOR A MAGMATIC ARC ORIGIN	497142	BASALT	63.1235	-49.8218	2973	0.990945	48.7	0.71	15.4	10.17	0.19	7.6	12.8	2.5	0.8	0.06	4.15	1.75
SW Greenland	TRACE ELEMENT SYSTEMATICS OF THE NEOARCHEAN FISKENÆSSET ANORTHOSITE COMPLEX AND ASSOCIATED META-VOLCANIC ROCKS, SW GREENLAND: EVIDENCE FOR A MAGMATIC ARC ORIGIN	497134	BASALT	63.197	-49.2828	2973	0.995563	47.8	0.76	16.4	10.26	0.17	9.1	11.2	2.7	0.5	0.06	2.48	1.49
Southwest Greenland	AN OVERVIEW OF THE GEOCHEMISTRY OF EOARCHEAN TO MESOARCHEAN ULTRAMAFIC TO MAFIC VOLCANIC ROCKS, SW GREENLAND: IMPLICATIONS FOR MANTLE DEPLETION AND PETROGENETIC PROCESSES AT SUBDUCTION ZONES IN THE EARLY EARTH	508079	BASALT	63	-49.5	2970	0.934402	46.2	1.1	16.4	13.05	0.22	7.3	12.2	1.9	0.13	0.09	2.45	3.07
Southwest Greenland	AN OVERVIEW OF THE GEOCHEMISTRY OF EOARCHEAN TO MESOARCHEAN ULTRAMAFIC TO MAFIC VOLCANIC ROCKS, SW GREENLAND: IMPLICATIONS FOR MANTLE DEPLETION AND PETROGENETIC PROCESSES AT SUBDUCTION ZONES IN THE EARLY EARTH	508069	BASALT	63	-49.5	2970	0.916348	47.6	0.99	15.3	12.78	0.22	8.5	10.8	2	0.22	0.07	2.3	2.12
Southwest Greenland	AN OVERVIEW OF THE GEOCHEMISTRY OF EOARCHEAN TO MESOARCHEAN ULTRAMAFIC TO MAFIC VOLCANIC ROCKS, SW GREENLAND: IMPLICATIONS FOR MANTLE DEPLETION AND PETROGENETIC PROCESSES AT SUBDUCTION ZONES IN THE EARLY EARTH	508066	BASALT	63	-49.5	2970	0.98817	47.2	0.92	15.2	13.14	0.24	8.4	10.8	2.3	0.28	0.06	2.47	2.01
Southwest Greenland	AN OVERVIEW OF THE GEOCHEMISTRY OF EOARCHEAN TO MESOARCHEAN ULTRAMAFIC TO MAFIC VOLCANIC ROCKS, SW GREENLAND: IMPLICATIONS FOR MANTLE DEPLETION AND PETROGENETIC PROCESSES AT SUBDUCTION ZONES IN THE EARLY EARTH	508074	BASALT	63	-49.5	2970	0.980377	47.6	0.83	16.7	11.79	0.2	9	9.8	2.4	0.34	0.06	2.09	1.72
Eastern Transvaal, south Africa	A GEOCHEMICAL STUDY OF A PRECAMBRIAN MAFIC DYKE SWARM, EASTERN TRANSVAAL, SOUTH AFRICA	BA-10	THOLEIITE	-25.8	30.5	2965.9	0.983499	53.06	0.6	14.24	9.76	0.17	8.61	9.32	2.45	0.85	0.09	17.3	1.68
Pilbara	ARCHEAN BONINITE-LIKE ROCKS IN AN INTRACRATONIC SETTING	142368	BASALT	-20.8	117.8	2965	0.966069	52.65	0.26	16.65	8.67	0.17	7.97	8.1	1.73	0.18	0.04	5.99	1.67
Pilbara	ARCHEAN BONINITE-LIKE ROCKS IN AN INTRACRATONIC SETTING	142194	BASALT	-20.8	117.8	2965	0.992467	53.51	0.26	17.12	8.11	0.16	8.22	8.11	1.65	0.39	0.05	6.46	1.54
Pilbara	ARCHEAN BONINITE-LIKE ROCKS IN AN INTRACRATONIC SETTING	142359	BASALT	-20.8	117.8	2965	0.999463	52.69	0.24	17.67	7.63	0.17	8.64	7.41	2.68	0.09	0.04	5.16	1.52
Pilbara	ARCHEAN BONINITE-LIKE ROCKS IN AN INTRACRATONIC SETTING	142360	BASALT	-20.8	117.8	2965	0.999402	49.21	0.17	13.44	8.48	0.17	16.06	6.1	0.63	1.16	0.03	3.33	1.09
Pilbara	EVIDENCE FOR EARLY LREE-ENRICHED MANTLE SOURCE REGIONS: DIVERSE MAGMAS FROM THE C. 3.0 GA MALLINA BASIN, PILBARA CRATON, NW AUSTRALIA	142-281	BASALT	-20.8	117.8	2960	0.969374	53.99	0.48	12.6	9.08	0.16	8.65	8.17	2.2	1.07	0.06	13.35	1.78
Superior	TRACE ELEMENT AND SM-ND SYSTEMATICS OF VOLCANIC AND INTRUSIVE ROCKS FROM THE 3 GA LUMBY LAKE GREENSTONE BELT, SUPERIOR PROVINCE; EVIDENCE FOR ARCHEAN PLUME-ARC INTERACTION	LU95-19	THOLEIITE	48	-90	2951	0.999873	52.69	1.18	14.57	11.01	0.2	6.27	9.52	3.2	0.05	0.09	3.61	2.6
Superior Province	KOMATIITE-BASALT-RHYOLITE VOLCANIC ASSOCIATIONS IN NORTHERN SUPERIOR PROVINCE GREENSTONE BELTS; SIGNIFICANCE OF PLUME-ARC INTERACTION IN THE GENERATION OF THE PROTO CONTINENTAL SUPERIOR PROVINCE	NDC87-09C	BASALT	51	-93.5	2950	0.978437	52.98	0.22	6.91	9.63	0.21	16.31	12.05	0.35	0.25	0.02	2.46	0.61
Tipasjärvi-Kuhmo-Suomussalmi, Finland	ARCHEAN EVOLUTION OF THE TIPASJÄRVI-KUHMO-SUOMUSSALMI GREENSTONE COMPLEX, FINLAND	20SMS 60-1/28.50	basalt	65.1459	29.0719	2942	0.985648	51.06	0.53	6.71	10.16	0.191	16.79	10.9	0.47	0.05	0.013	2	1.8
Northern Superior Province	ALLOCHTHONOUS 2.78 GA OCEANIC PLATEAU SLIVERS IN A 2.72 GA CONTINENTAL ARC SEQUENCE; VIZIEN GREENSTONE BELT, NORTHEASTERN SUPERIOR PROVINCE, CANADA	PBA92-2008C	ANDESITE	58.08	-73	2940	0.9941	52.5	0.96	14.4	9.23	0.15	7.67	8.96	3.9	0.17	0.09	4	1.9
Northern Superior Province	ALLOCHTHONOUS 2.78 GA OCEANIC PLATEAU SLIVERS IN A 2.72 GA CONTINENTAL ARC SEQUENCE; VIZIEN GREENSTONE BELT, NORTHEASTERN SUPERIOR PROVINCE, CANADA	PBA92-2008G	BASALT	58.08	-73	2940	0.942235	52.4	0.52	11.9	9.12	0.18	12.1	8.88	2.7	0.06	0.04	2.1	1.5
Brazil	GEOCHEMISTRY OF METAVOLCANIC ROCKS IN THE ARCHEAN GREENSTONE BELT OF IDENTIDADE, SE PARA, BRAZIL	9	THOLEIITE	-6.5	-49.5	2935	0.949097	50.12	0.83	14.79	12.15	0.21	8.02	11.31	1.87	0.31	0.18	3.73	2.08
Brazil	GEOCHEMISTRY OF METAVOLCANIC ROCKS IN THE ARCHEAN GREENSTONE BELT OF IDENTIDADE, SE PARA, BRAZIL	56B	THOLEIITE	-6.5	-49.5	2935	0.992738	48.99	0.9	16.06	12.44	0.2	7.68	11.25	1.65	0.28	0.2	3.95	2.01
Brazil	GEOCHEMISTRY OF METAVOLCANIC ROCKS IN THE ARCHEAN GREENSTONE BELT OF IDENTIDADE, SE PARA, BRAZIL	32A	THOLEIITE	-6.5	-49.5	2935	0.996934	49.37	0.86	15.13	12.18	0.21	8	11.86	1.78	0.2	0.18	3.7	2.01
Brazil	GEOCHEMISTRY OF METAVOLCANIC ROCKS IN THE ARCHEAN GREENSTONE BELT OF IDENTIDADE, SE PARA, BRAZIL	57A	THOLEIITE	-6.5	-49.5	2935	0.998162	49.3	0.9	16.25	12.36	0.21	7.91	11.07	1.09	0.31	0.18	4.15	1.93
Brazil	GEOCHEMISTRY OF METAVOLCANIC ROCKS IN THE ARCHEAN GREENSTONE BELT OF IDENTIDADE, SE PARA, BRAZIL	266B	THOLEIITE	-6.5	-49.5	2935	0.983458	50.5	0.8	15.07	12.15	0.23	7.83	11.45	1.35	0.21	0.18	3.52	1.92
Brazil	GEOCHEMISTRY OF METAVOLCANIC ROCKS IN THE ARCHEAN GREENSTONE BELT OF IDENTIDADE, SE PARA, BRAZIL	478	THOLEIITE	-6.5	-49.5	2935	0.951244	48.66	0.86	16.21	12.12	0.21	7.4	11.15	2.62	0.4	0.16	3.69	1.71
Brazil	GEOCHEMISTRY OF METAVOLCANIC ROCKS IN THE ARCHEAN GREENSTONE BELT OF IDENTIDADE, SE PARA, BRAZIL	270C	THOLEIITE	-6.5	-49.5	2935	0.997611	49.53	0.7	15.79	10.72	0.18	8.55	12.12	2.02	0.08	0.17	3.55	1.57
Brazil	GEOCHEMISTRY OF METAVOLCANIC ROCKS IN THE ARCHEAN GREENSTONE BELT OF IDENTIDADE, SE PARA, BRAZIL	168	THOLEIITE	-6.5	-49.5	2935	0.998304	48.93	0.7	15.84	10.81	0.19	8.62	12.91	1.58	0.08	0.17	2.83	1.56
Australia	GEOCHEMISTRY OF KOMATIITES FROM FORRESTANIA, SOUTHERN CROSS PROVINCE, WESTERN AUSTRALIA; EVIDENCE FOR CRUSTAL CONTAMINATION	FFD58109.25M	BASALT	-32	119	2900	0.995968	49.98	0.57	10.75	11.81	0.187	14.92	8.52	2.17	0.09	0.047	3.7	2.1
North Caribou terrane, Superior	MESO- AND NEOARCHEAN EVOLUTION OF THE ISLAND LAKE GREENSTONE BELT AND THE NORTHWESTERN SUPERIOR PROVINCE: EVIDENCE FROM LITHOGEOCHEMISTRY, ND ISOTOPE DATA, AND U-PB ZIRCON GEOCHRONOLOGY	102-98-812	BASALT	53.856	-94.2387	2897	0.988322	52.0075	0.7761	15.418	10.68	0.2038	7.2641	9.0335	2.7732	0.8382	0.0828	9.3994	2.0489
North Caribou terrane, Superior	MESO- AND NEOARCHEAN EVOLUTION OF THE ISLAND LAKE GREENSTONE BELT AND THE NORTHWESTERN SUPERIOR PROVINCE: EVIDENCE FROM LITHOGEOCHEMISTRY, ND ISOTOPE DATA, AND U-PB ZIRCON GEOCHRONOLOGY	52-IL-98-12	BASALT	53.8309	-94.2451	2897	0.950284	51.5468	0.673	14.2286	11.02	0.2633	10.3565	6.7916	3.3702	0.4712	0.0615	6.4336	1.5624
Northern Superior Province	CONSTRAINTS ON EARLY ARCHEAN CRUSTAL EXTRACTION AND THOLEIITIC-KOMATIITIC VOLCANISM IN GREENSTONE BELTS OF NORTHERN SUPERIOR PROVINCE	17	BASALT	59.8	-72	2878	0.980474	48.67	0.54	12.87	10.77	0.25	11.54	11.4	1.48	0.27	0.03	1.67	1.68
NW Tanzania	GEOCHEMISTRY AND PETROGENESIS OF VOLCANIC ROCKS OF THE NEOARCHAEAN SUKUMALAND GREENSTONE BELT, NORTHWESTERN TANZANIA	R78	BASALT	-3.08	32.4	2873	0.933785	51.4	0.82	13.67	10.36	0.15	8.7	9.9	1.19	0.09	0.09	2.4	1.78
NW Tanzania	GEOCHEMISTRY AND PETROGENESIS OF VOLCANIC ROCKS OF THE NEOARCHAEAN SUKUMALAND GREENSTONE BELT, NORTHWESTERN TANZANIA	R39	ANDESITE	-3.08	32.4	2873	0.936009	48.66	0.73	16.61	8.57	0.18	8.36	12.84	2.01	0.07	0.09	2.8	1.62
NW Tanzania	GEOCHEMISTRY AND PETROGENESIS OF VOLCANIC ROCKS OF THE NEOARCHAEAN SUKUMALAND GREENSTONE BELT, NORTHWESTERN TANZANIA	R38	ANDESITE	-3.08	32.4	2873	0.982879	48.85	0.71	16.1	9.11	0.24	6.54	13.6	2.06	0.17	0.07	3.1	1.6
NW Tanzania	GEOCHEMISTRY AND PETROGENESIS OF VOLCANIC ROCKS OF THE NEOARCHAEAN SUKUMALAND GREENSTONE BELT, NORTHWESTERN TANZANIA	R13	BASALT	-3.08	32.4	2873	0.920868	47.9	0.55	15.76	9.94	0.18	8.86	11.41	1.64	0.1	0.09	1.8	1.4
NW Tanzania	GEOCHEMISTRY AND PETROGENESIS OF VOLCANIC ROCKS OF THE NEOARCHAEAN SUKUMALAND GREENSTONE BELT, NORTHWESTERN TANZANIA	R12	BASALT	-3.08	32.4	2873	0.942395	48.32	0.53	15.5	9.76	0.2	8.76	11.59	1.53	0.12	0.09	2	1.37
North Caribou terrane, Superior	MESO- AND NEOARCHEAN EVOLUTION OF THE ISLAND LAKE GREENSTONE BELT AND THE NORTHWESTERN SUPERIOR PROVINCE: EVIDENCE FROM LITHOGEOCHEMISTRY, ND ISOTOPE DATA, AND U-PB ZIRCON GEOCHRONOLOGY	52-IL-98-38	BASALT	53.9045	-94.7281	2852	0.911768	53.9821	0.6217	11.9412	9.78	0.2107	7.9231	12.229	1.9217	0.2466	0.0617	6.9211	1.4807
Baltic Shield	OCEANIC PLATEAU MODEL FOR CONTINENTAL CRUSTAL GROWTH IN THE ARCHAEAN; A CASE STUDY FROM THE KOSTOMUKSHA GREENSTONE BELT, NW BALTIC SHIELD	9444	THOLEIITE	64.65	30.75	2843.5	0.954496	51.1	1.16	14.1	13.05	0.19	7.02	8.67	2.67	0.56	0.09	2.62	3.03
Baltic Shield	EARLY MAGMATISM OF THE BELOMORIAN MOBILE BELT, BALTIC SHIELD: LATERAL ZONING AND ISOTOPIC AGE	450-2	BASALT	66.25	33.75	2835	0.979246	48.8	0.98	15.14	14.02	0.14	7.05	8.54	2.81	0.28	0.1	1.8	2.2
Baltic Shield	EARLY MAGMATISM OF THE BELOMORIAN MOBILE BELT, BALTIC SHIELD: LATERAL ZONING AND ISOTOPIC AGE	450-1	BASALT	66.25	33.75	2835	0.998893	48.8	1.04	15.77	13.09	0.19	6.96	9.45	2.25	0.23	0.17	4.6	2.1
Baltic Shield	EARLY MAGMATISM OF THE BELOMORIAN MOBILE BELT, BALTIC SHIELD: LATERAL ZONING AND ISOTOPIC AGE	311-9	BASALT	66.25	33.75	2835	0.993651	46.6	1.03	14.51	15.47	0.52	7.06	11.43	1.04	0.23		3.5	2
Jharol Belt, India	GEOCHEMISTRY AND PETROGENESIS OF LATE ARCHAEAN ARAVALLI VOLCANICS, BASEMENT ENCLAVES AND GRANITOIDS, RAJASTHAN	BE.3	NOT-GIVEN	24.93	73.82	2830	0.99232	50.8	0.68	14.5	10.18	0.2	9.4	11.04	1.77	0.53	0.06	4.9	1.43
Northern Superior Province	CONSTRAINTS ON EARLY ARCHEAN CRUSTAL EXTRACTION AND THOLEIITIC-KOMATIITIC VOLCANISM IN GREENSTONE BELTS OF NORTHERN SUPERIOR PROVINCE	23	BASALT	60.8	-71	2820	0.996732	46.12	0.51	16.61	10.23	0.19	10	9.36	1.34	2.58	0.04	3.18	1.29
Northern Superior Province	CONSTRAINTS ON EARLY ARCHEAN CRUSTAL EXTRACTION AND THOLEIITIC-KOMATIITIC VOLCANISM IN GREENSTONE BELTS OF NORTHERN SUPERIOR PROVINCE	34	BASALT	60.8	-71	2820	0.97016	49.33	0.46	12.6	14.17	0.28	8.05	10.23	2.58	0.27	0.01	1.36	1.27
Karelian, Finland	GEOCHEMISTRY OF KOMATIITES FROM THE TIPASJÄRVI, KUHMO, SUOMUSSALMI, ILOMANTSI AND TULPPIO GREENSTONE BELTS, FINLAND: IMPLICATIONS FOR TECTONIC SETTING AND NI SULPHIDE PROSPECTIVITY	HJO-87-79.1	BASALT	62.7	30.9	2815	0.95133	50.2	0.5412	9.41	11.06	0.2024	13.7	7.615	2.65	0.402	0.1648	5.97	1.41
Karelian, Finland	GEOCHEMISTRY OF KOMATIITES FROM THE TIPASJÄRVI, KUHMO, SUOMUSSALMI, ILOMANTSI AND TULPPIO GREENSTONE BELTS, FINLAND: IMPLICATIONS FOR TECTONIC SETTING AND NI SULPHIDE PROSPECTIVITY	12-PTP-03	BASALT	64.24	29.1	2815	0.916119	45.3	0.54	10.6	10.81	0.195	15.8	10.04	0.78	0.299	0.035	1.36	1.37
Karelian, Finland	GEOCHEMISTRY OF KOMATIITES FROM THE TIPASJÄRVI, KUHMO, SUOMUSSALMI, ILOMANTSI AND TULPPIO GREENSTONE BELTS, FINLAND: IMPLICATIONS FOR TECTONIC SETTING AND NI SULPHIDE PROSPECTIVITY	75-PTP-03	BASALT	65.2	29.1	2815	0.937338	49.8	0.72	16.1	7.77	0.146	9.8	7.51	2.86	0.053	0.05	1.05	1.29
Karelian, Finland	GEOCHEMISTRY OF KOMATIITES FROM THE TIPASJÄRVI, KUHMO, SUOMUSSALMI, ILOMANTSI AND TULPPIO GREENSTONE BELTS, FINLAND: IMPLICATIONS FOR TECTONIC SETTING AND NI SULPHIDE PROSPECTIVITY	25-PTP-03	BASALT	64.27	29.05	2815	0.969899	51.1	0.367	14.8	6.25	0.155	11.2	10.93	2.16	0.981	0.018	1.45	0.79
Yilgarn	LONG-LIVED, AUTOCHTHONOUS DEVELOPMENT OF THE ARCHEAN MURCHISON DOMAIN, AND IMPLICATIONS FOR YILGARN CRATON TECTONICS	81449	BASALT	-26.5	118.3	2792	0.997417	50	0.4	10.8	8.39	0.19	14.9	9.21	1.15	0.06	0.08	2.2	1.63
Karelian, Finland	KALIKORVA STRUCTURE AND ITS POSITION IN THE SYSTEM OF THE NORTHERN KARELIAN GREENSTONE BELTS: GEOCHEMICAL AND GEOCHRONOLOGICAL DATA	35/12A	BASALT	66.78	32	2785	0.959567	45.9	0.74	12.2	11.11	0.22	11.63	14.62	1.25	0.89	0.2	11.3	1.39
Yilgarn	KOMATIITES OF THE WILDARA-LEONORA BELT, YILGARN CRATON, WA: THE MISSING LINK IN THE KALGOORLIE TERRANE?	WD103-193.4	basalt	-28.5	121.5	2785	0.950906	52.43	0.61	13.56	10.35	0.16	9.68	8.27	3.81	0.16	0.04	3.04	1.31
Northern Karelia, Finland	HIGH-MG, LOW-TI QUARTZ AMPHIBOLITES OF GREENSTONE BELTS FROM NORTHERN KARELIA - METAMORPHOSED ARCHEAN ANALOGUES OF BONINITES?	N-333	BASALT	66.25	33.75	2778	0.977729	47.13	0.41	10.08	11.64	0.18	16.59	10.48	0.49	0.06	0.05	1.17	1.02
Superior	GEOCHEMISTRY OF BONINITE-TYPE VOLCANIC ROCKS IN THE FROTET-EVANS GREENSTONE BELT, OPATICA SUBPROVINCE, QUEBEC: IMPLICATIONS FOR THE EVOLUTION OF ARCHEAN GREENSTONE BELTS	135685IC	BASALT	51	-74	2774	0.995637	51.3	0.37	13.6	9.7	0.2	11.3	8.2	1.9	0.1	0.01	2.49	1.59
Superior	GEOCHEMISTRY OF BONINITE-TYPE VOLCANIC ROCKS IN THE FROTET-EVANS GREENSTONE BELT, OPATICA SUBPROVINCE, QUEBEC: IMPLICATIONS FOR THE EVOLUTION OF ARCHEAN GREENSTONE BELTS	133731IC	BASALT	51	-74	2774	0.949731	49	0.44	14.5	8.6	0.2	7	10.7	1.8	0.3	0.09	2.75	1.57
Superior	GEOCHEMISTRY OF BONINITE-TYPE VOLCANIC ROCKS IN THE FROTET-EVANS GREENSTONE BELT, OPATICA SUBPROVINCE, QUEBEC: IMPLICATIONS FOR THE EVOLUTION OF ARCHEAN GREENSTONE BELTS	135643IC	ANDESITE	51	-74	2774	0.995293	52.2	0.36	13.7	10.6	0.2	9.3	9.7	1.7	0.1	0.01	2.8	1.38
Superior	GEOCHEMISTRY OF BONINITE-TYPE VOLCANIC ROCKS IN THE FROTET-EVANS GREENSTONE BELT, OPATICA SUBPROVINCE, QUEBEC: IMPLICATIONS FOR THE EVOLUTION OF ARCHEAN GREENSTONE BELTS	94-1359	THOLEIITE	51	-74	2774	0.995178	48.4	0.6	14	8.91	0.2	11.8	8.8	0.2	1.7	0	2.46	1.34
Superior	GEOCHEMISTRY OF BONINITE-TYPE VOLCANIC ROCKS IN THE FROTET-EVANS GREENSTONE BELT, OPATICA SUBPROVINCE, QUEBEC: IMPLICATIONS FOR THE EVOLUTION OF ARCHEAN GREENSTONE BELTS	96-12067	BASALT	51	-74	2774	0.990537	52.4	0.76	13.6	8.73	0.2	8.4	8.5	3.1	1.2	0.3	28	1.3
Superior	GEOCHEMISTRY OF BONINITE-TYPE VOLCANIC ROCKS IN THE FROTET-EVANS GREENSTONE BELT, OPATICA SUBPROVINCE, QUEBEC: IMPLICATIONS FOR THE EVOLUTION OF ARCHEAN GREENSTONE BELTS	92-6532	THOLEIITE	51	-74	2774	0.997307	46.6	0.62	15.3	9.81	0.2	10.5	11.1	0.2	1.5	0.05	2.5	1.3
Superior	GEOCHEMISTRY OF BONINITE-TYPE VOLCANIC ROCKS IN THE FROTET-EVANS GREENSTONE BELT, OPATICA SUBPROVINCE, QUEBEC: IMPLICATIONS FOR THE EVOLUTION OF ARCHEAN GREENSTONE BELTS	135587IC	BASALT	51	-74	2774	0.977552	49.5	0.37	13.7	10.2	0.2	13	6.1	1.5	0.8	0.1	2.21	1.19
Superior	GEOCHEMISTRY OF BONINITE-TYPE VOLCANIC ROCKS IN THE FROTET-EVANS GREENSTONE BELT, OPATICA SUBPROVINCE, QUEBEC: IMPLICATIONS FOR THE EVOLUTION OF ARCHEAN GREENSTONE BELTS	93-12559	ANDESITE	51	-74	2774	0.955459	53.1	0.42	14.4	7.38	0.2	9.8	11.1	1.7	0.1	0.02	2.88	1.11
Tipasjärvi-Kuhmo-Suomussalmi, Finland	ARCHEAN EVOLUTION OF THE TIPASJÄRVI-KUHMO-SUOMUSSALMI GREENSTONE COMPLEX, FINLAND	174TOH 93-1	BASALT	64.2389	29.087	2770	0.965338	51.1	0.68	14.5	9.97	0.231	8.6	11.77	2.23	0.23	0.044	2	2.4
Yilgarn	LONG-LIVED, AUTOCHTHONOUS DEVELOPMENT OF THE ARCHEAN MURCHISON DOMAIN, AND IMPLICATIONS FOR YILGARN CRATON TECTONICS	190551	BASALT	-26.5	118.3	2769.5	0.998178	48.81	0.829	14.167	10.79	0.187	7.136	13.215	1.198	0.117	0.077	2.72	2.14
Yilgarn	LONG-LIVED, AUTOCHTHONOUS DEVELOPMENT OF THE ARCHEAN MURCHISON DOMAIN, AND IMPLICATIONS FOR YILGARN CRATON TECTONICS	81511	BASALT	-26.5	118.3	2769.5	0.982246	48.6	0.56	10.2	11.26	0.18	14.5	8.14	0.72	0.17	0.08	4.4	1.73
Yilgarn	LONG-LIVED, AUTOCHTHONOUS DEVELOPMENT OF THE ARCHEAN MURCHISON DOMAIN, AND IMPLICATIONS FOR YILGARN CRATON TECTONICS	81524	BASALT	-26.5	118.3	2769.5	0.996612	51.2	0.43	11.4	9.24	0.17	12.9	8.8	0.82	0.12	0.08	2.2	1.6
Yilgarn	LONG-LIVED, AUTOCHTHONOUS DEVELOPMENT OF THE ARCHEAN MURCHISON DOMAIN, AND IMPLICATIONS FOR YILGARN CRATON TECTONICS	81517	BASALT	-26.5	118.3	2769.5	0.99707	50.2	0.42	10.7	9.37	0.16	14.5	8.31	1.18	0.16	0.07	2.3	1.5
Dharwar	GEOCHEMICAL SYSTEMATICS OF THOLEIITIC BASALTS FROM THE 2.7 GA RAMAGIRI-HUNGUND COMPOSITE GREENSTONE BELT, DHARWAR CRATON	P24	BASALT	14.75	77.25	2746	0.954087	49.9	0.64	13.22	11.07	0.2	10.08	10.45	2.44	0.18	0.05	1.84	1.66
Dharwar	GEOCHEMICAL SYSTEMATICS OF THOLEIITIC BASALTS FROM THE 2.7 GA RAMAGIRI-HUNGUND COMPOSITE GREENSTONE BELT, DHARWAR CRATON	P33	BASALT	14.75	77.25	2746	0.944505	50.71	0.64	13.41	10.04	0.17	8.86	11.74	2	0.13	0.05	1.78	1.58
Dharwar	GEOCHEMICAL SYSTEMATICS OF THOLEIITIC BASALTS FROM THE 2.7 GA RAMAGIRI-HUNGUND COMPOSITE GREENSTONE BELT, DHARWAR CRATON	P31	BASALT	14.75	77.25	2746	0.948955	50.54	0.6	12.93	10.49	0.18	8.71	12.97	1.63	0.22	0.05	1.63	1.58
Eastern Dharwar	GEOCHEMISTRY OF THE NEO-ARCHAEAN HIGH-MG BASALTS, BONINITES AND ADAKITES FROM THE KUSHTAGI-HUNGUND GREENSTONE BELT OF THE EASTERN DHARWAR CRATON (EDC); IMPLICATIONS FOR THE TECTONIC SETTING	RIH-19	BASALT	15.8975	76.0181	2746	0.950415	51.47	0.45	14.1	9.48	0.17	10.96	10.63	1.31	0.08	0.03	2.86	1.2
Superior	TRACE ELEMENT GEOCHEMISTRY OF THE MEEN-DEMPSTER GREENSTONE BELT, UCHI SUBPROVINCE, SUPERIOR PROVINCE, CANADA: BACK-ARC DEVELOPMENT ON THE MARGINS OF AN ARCHEAN PROTOCONTINENT	84GRS-0032	THOLEIITE	51	-91	2742	0.931072	49.95	1.78	14.78	13.68	0.23	6.33	7.66	3.82	0.12	0.11	5.74	2.76
Superior	TRACE ELEMENT GEOCHEMISTRY OF THE MEEN-DEMPSTER GREENSTONE BELT, UCHI SUBPROVINCE, SUPERIOR PROVINCE, CANADA: BACK-ARC DEVELOPMENT ON THE MARGINS OF AN ARCHEAN PROTOCONTINENT	82GRS-0292	THOLEIITE	51	-91	2742	0.990648	48.27	0.95	15.07	11.92	0.19	8.44	11.92	1.62	0.24	0.05	2.71	2.25
Superior	TRACE ELEMENT GEOCHEMISTRY OF THE MEEN-DEMPSTER GREENSTONE BELT, UCHI SUBPROVINCE, SUPERIOR PROVINCE, CANADA: BACK-ARC DEVELOPMENT ON THE MARGINS OF AN ARCHEAN PROTOCONTINENT	82GRS-0088	THOLEIITE	51	-91	2742	0.994262	50.81	0.84	14.3	11.5	0.19	6.98	12.17	1.62	0.21	0.1	2.83	2.23
Superior	BASIC LAVAS OF THE ARCHEAN LA GRANDE GREENSTONE BELT: PRODUCTS OF POLYBARIC FRACTIONATION AND CRUSTAL CONTAMINATION	18A	THOLEIITE	53.75	-75.5	2741.5	0.98706	51.83	1.05	15.02	11.1	0.23	6.83	9.46	1.81	0.16	0.06	2.75	2.31
Superior	BASIC LAVAS OF THE ARCHEAN LA GRANDE GREENSTONE BELT: PRODUCTS OF POLYBARIC FRACTIONATION AND CRUSTAL CONTAMINATION	216	THOLEIITE	53.75	-75.5	2741.5	0.998145	48.47	0.83	16.51	10.85	0.2	7.61	9.4	2.23	0.02	0.06	2.6	2.01
Superior	BASIC LAVAS OF THE ARCHEAN LA GRANDE GREENSTONE BELT: PRODUCTS OF POLYBARIC FRACTIONATION AND CRUSTAL CONTAMINATION	285C	ANDESITE	53.75	-75.5	2741.5	0.95542	49.79	0.4	9.39	8.81	0.18	15.43	10.34	1.49	0.54	0.09	15	0.79
Superior	NEOARCHEAN EVOLUTION OF DIFFERING CONVERGENT MARGIN ASSEMBLAGES IN THE WABIGOON SUBPROVINCE: GEOCHEMICAL AND GEOCHRONOLOGICAL EVIDENCE FROM THE LAKE OF THE WOODS GREENSTONE BELTS, SUPERIOR PROVINCE, NORTHWESTERN CANADA	90-1	basalt	49.2	-94.6	2738	0.972948	48.57	0.87	14.9	12.12	0.21	7.57	10.74	1.88	0.62	0.06	2.49	1.95
Superior	NEOARCHEAN EVOLUTION OF DIFFERING CONVERGENT MARGIN ASSEMBLAGES IN THE WABIGOON SUBPROVINCE: GEOCHEMICAL AND GEOCHRONOLOGICAL EVIDENCE FROM THE LAKE OF THE WOODS GREENSTONE BELTS, SUPERIOR PROVINCE, NORTHWESTERN CANADA	93-23	basalt	49.2	-94.6	2738	0.94847	49.2	0.73	14.3	12.15	0.21	8.05	11.3	1.71	0.09	0.07	2.16	1.84
Superior	NEOARCHEAN EVOLUTION OF DIFFERING CONVERGENT MARGIN ASSEMBLAGES IN THE WABIGOON SUBPROVINCE: GEOCHEMICAL AND GEOCHRONOLOGICAL EVIDENCE FROM THE LAKE OF THE WOODS GREENSTONE BELTS, SUPERIOR PROVINCE, NORTHWESTERN CANADA	87-615	basalt	49.2	-94.6	2738	0.998718	47.9	0.77	14.3	12.69	0.2	8.27	8.66	1.74	0.04	0.05	2.8	1.8
Superior	NEOARCHEAN EVOLUTION OF DIFFERING CONVERGENT MARGIN ASSEMBLAGES IN THE WABIGOON SUBPROVINCE: GEOCHEMICAL AND GEOCHRONOLOGICAL EVIDENCE FROM THE LAKE OF THE WOODS GREENSTONE BELTS, SUPERIOR PROVINCE, NORTHWESTERN CANADA	93-37	basalt	49.2	-94.6	2738	0.978724	46.8	0.67	14.9	10.8	0.18	7.6	9.83	0.29	0.02	0.07	2.14	1.71
Superior	NEOARCHEAN EVOLUTION OF DIFFERING CONVERGENT MARGIN ASSEMBLAGES IN THE WABIGOON SUBPROVINCE: GEOCHEMICAL AND GEOCHRONOLOGICAL EVIDENCE FROM THE LAKE OF THE WOODS GREENSTONE BELTS, SUPERIOR PROVINCE, NORTHWESTERN CANADA	85S-336	basalt	49.2	-94.6	2738	0.986964	47.5	0.57	15.6	9.94	0.17	8.45	9.86	2.89	0.02	0.01	1.8	1.6
Superior	NEOARCHEAN EVOLUTION OF DIFFERING CONVERGENT MARGIN ASSEMBLAGES IN THE WABIGOON SUBPROVINCE: GEOCHEMICAL AND GEOCHRONOLOGICAL EVIDENCE FROM THE LAKE OF THE WOODS GREENSTONE BELTS, SUPERIOR PROVINCE, NORTHWESTERN CANADA	86-359	basalt	49.2	-94.6	2738	0.992091	49.9	0.6	13.3	10.71	0.15	8.54	9.12	2.97	0.03	0.04	2.86	1.55
Superior	NEOARCHEAN EVOLUTION OF DIFFERING CONVERGENT MARGIN ASSEMBLAGES IN THE WABIGOON SUBPROVINCE: GEOCHEMICAL AND GEOCHRONOLOGICAL EVIDENCE FROM THE LAKE OF THE WOODS GREENSTONE BELTS, SUPERIOR PROVINCE, NORTHWESTERN CANADA	86-168	basalt	49.2	-94.6	2738	0.989183	47.1	0.5	17.8	9.36	0.15	9.39	10.7	1.42	0.17	0.04	1.38	1.49
Superior	NEOARCHEAN EVOLUTION OF DIFFERING CONVERGENT MARGIN ASSEMBLAGES IN THE WABIGOON SUBPROVINCE: GEOCHEMICAL AND GEOCHRONOLOGICAL EVIDENCE FROM THE LAKE OF THE WOODS GREENSTONE BELTS, SUPERIOR PROVINCE, NORTHWESTERN CANADA	85S-113	basalt	49.2	-94.6	2738	0.997787	47.6	0.46	10.6	10.22	0.19	13.8	11.9	0.83	0	0.03	2.08	1.15
Uchi-Confederation, Canada	THE GEOCHEMISTRY OF REPETITIVE CYCLICAL VOLCANISM FROM BASALT THROUGH RHYOLITE IN THE UCHI-CONFEDERATION GREENSTONE BELT, CANADA	461	BASALT	51.1	-92.63	2737	0.962269	48.9	0.8	17	10	0.17	8.91	10.9	3.07	0	0.02	4.11	1.77
Uchi-Confederation, Canada	THE GEOCHEMISTRY OF REPETITIVE CYCLICAL VOLCANISM FROM BASALT THROUGH RHYOLITE IN THE UCHI-CONFEDERATION GREENSTONE BELT, CANADA	462	BASALT	51.12	-92.63	2737	0.963083	47.1	0.9	17.6	11.6	0.19	9.68	9.6	2.98	0.03	0.02	5	1.36
Yilgarn	OCCURRENCE OF KOMATIITES IN THE SANDSTONE GREENSTONE BELT, NORTH-CENTRAL YILGARN CRATON	178344	BASALT	-27.5	119	2731	0.946573	48.09	0.51	9.42	9.69	0.18	16.69	8.71	1.18	0.09	0.06	3.05	1.29
Abitibi	THE KEY TUFFITE, MATAGAMI CAMP, ABITIBI GREENSTONE BELT, CANADA: PETROGENESIS AND IMPLICATIONS FOR VMS FORMATION AND EXPLORATION	969353	basalt	49.75	-77.63	2725.65	0.997539	53.4434	0.4181	16.5273	7.18	0.0477	14.0922	0.01	0.073	0.5063	0.015	6.5	0.66
Superior Province	KOMATIITE FLOODING OF A RIFTED ARCHEAN RHYOLITIC ARC COMPLEX: GEOCHEMICAL SIGNATURE AND TECTONIC SIGNIFICANCE OF THE STOUGHTON-ROQUEMAURE GROUP, ABITIBI GREENSTONE BELT, CANADA	WP-94-5	BASALT	48.5	-79.2	2725	0.980624	47.27	0.66	14.87	10.55	0.2	9.41	8.94	1.96	0.4	0.04	1.74	1.55
Superior	GEOCHEMISTRY AND ORIGIN OF ARCHEAN VOLCANIC ROCKS FROM THE UPPER KEEWATIN ASSEMBLAGE (CA. 2.7 GA), LAKE OF THE WOODS GREENSTONE BELT, WESTERN WABIGOON SUBPROVINCE, SUPERIOR PROVINCE, CANADA	K146	ANDESITE	49.2	-94.6	2723	0.959864	53.61	0.86	16.4	10.86	0.2	8.82	5.05	3.18	0.78	0.25	4.47	2.8
Superior	DECIPHERING AN ARCHEAN MANTLE PLUME: ABITIBI GREENSTONE BELT, CANADA	ROQ-8	BASALT	48.2	-80	2723	0.910109	49.87	0.73	13.48	10.69	0.17	8.14	10.67	2.8	0.03	0.05	2.87	2.22
Superior	GEOCHEMISTRY AND ORIGIN OF ARCHEAN VOLCANIC ROCKS FROM THE UPPER KEEWATIN ASSEMBLAGE (CA. 2.7 GA), LAKE OF THE WOODS GREENSTONE BELT, WESTERN WABIGOON SUBPROVINCE, SUPERIOR PROVINCE, CANADA	K120	BASALT	49.2	-94.6	2723	0.989653	51.58	0.92	12.92	11.32	0.15	8.37	10.84	2.42	1.49		14.3	1.88
Superior	GEOCHEMISTRY AND ORIGIN OF ARCHEAN VOLCANIC ROCKS FROM THE UPPER KEEWATIN ASSEMBLAGE (CA. 2.7 GA), LAKE OF THE WOODS GREENSTONE BELT, WESTERN WABIGOON SUBPROVINCE, SUPERIOR PROVINCE, CANADA	K159	THOLEIITE	49.2	-94.6	2723	0.99776	51.37	0.63	14.87	9.41	0.18	6.81	10.63	2.98	0.01	0.11	5.27	1.78
Superior	DECIPHERING AN ARCHEAN MANTLE PLUME: ABITIBI GREENSTONE BELT, CANADA	ROQ-1B	BASALT	48.2	-80	2723	0.976287	50.89	0.76	13.66	10.86	0.18	7.32	8.74	3.46	0.06	0.06	2.01	1.75
Superior	GEOCHEMISTRY AND ORIGIN OF ARCHEAN VOLCANIC ROCKS FROM THE UPPER KEEWATIN ASSEMBLAGE (CA. 2.7 GA), LAKE OF THE WOODS GREENSTONE BELT, WESTERN WABIGOON SUBPROVINCE, SUPERIOR PROVINCE, CANADA	K40	THOLEIITE	49.2	-94.6	2723	0.993098	50.87	0.51	12.72	11.75	0.17	11.66	10.59	1.48	0	0.25	2.46	1.72
Superior	GEOCHEMISTRY AND ORIGIN OF ARCHEAN VOLCANIC ROCKS FROM THE UPPER KEEWATIN ASSEMBLAGE (CA. 2.7 GA), LAKE OF THE WOODS GREENSTONE BELT, WESTERN WABIGOON SUBPROVINCE, SUPERIOR PROVINCE, CANADA	K153	THOLEIITE	49.2	-94.6	2723	0.981447	52.42	0.57	13.71	9.79	0.17	9.72	10.85	2.59	0.01	0.17	3.18	1.69
Superior	DECIPHERING AN ARCHEAN MANTLE PLUME: ABITIBI GREENSTONE BELT, CANADA	ROQ-8B	BASALT	48.2	-80	2723	0.99465	49.85	0.74	13.77	10.62	0.17	7.83	10.77	2.87	0.03	0.06	2.09	1.64
Superior	GEOCHEMISTRY AND ORIGIN OF ARCHEAN VOLCANIC ROCKS FROM THE UPPER KEEWATIN ASSEMBLAGE (CA. 2.7 GA), LAKE OF THE WOODS GREENSTONE BELT, WESTERN WABIGOON SUBPROVINCE, SUPERIOR PROVINCE, CANADA	K170	THOLEIITE	49.2	-94.6	2723	0.990998	50.34	0.58	12.71	11.06	0.18	11.39	11.79	1.56	0.26	0.13	3.12	1.63
Yilgarn	LONG-LIVED, AUTOCHTHONOUS DEVELOPMENT OF THE ARCHEAN MURCHISON DOMAIN, AND IMPLICATIONS FOR YILGARN CRATON TECTONICS	190507	BASALT	-26.5	118.3	2722.5	0.907314	51.993	0.615	14.351	9.81	0.179	6.684	10.278	1.849	0.304	0.101	8.17	2.03
Yilgarn	LONG-LIVED, AUTOCHTHONOUS DEVELOPMENT OF THE ARCHEAN MURCHISON DOMAIN, AND IMPLICATIONS FOR YILGARN CRATON TECTONICS	190540	BASALT	-26.5	118.3	2722.5	0.999887	53.387	0.626	15.097	7.46	0.145	6.794	10.82	2.548	0.486	0.101	5.63	1.82
Abitibi	SPATIAL AND TEMPORAL VARIATIONS IN THE GEOCHEMISTRY OF KOMATIITES AND KOMATIITIC BASALTS IN THE ABITIBI GREENSTONE BELT	ROQ95-7	BASALT	48.2	-80	2722.5	0.999879	50.58	0.84	9.18	11.8	0.19	16.49	9.03	1.51	0.01	0.06	3.32	1.11
Superior	THE CHARACTERISTICS AND ORIGIN OF THE BIG LAKE MAFIC-ULTRAMAFIC-HOSTED VOLCANOGENIC MASSIVE SULFIDE OCCURRENCE, MARATHON, ONTARIO, CANADA	626192	BASALT	48.6	-86.1	2719	0.982124	48.47	0.76	13.88	11.94	0.22	8.23	10.11	1.92	0.94	0.05	4.1	2.1
Superior	THE CHARACTERISTICS AND ORIGIN OF THE BIG LAKE MAFIC-ULTRAMAFIC-HOSTED VOLCANOGENIC MASSIVE SULFIDE OCCURRENCE, MARATHON, ONTARIO, CANADA	39-K	BASALT	48.6	-86.1	2719	0.988342	47.1	1	6.45	12.81	0.27	16.72	9.42	0.32	2.15	0.07	3.89	1.112
Superior	PÉTROLOGIE DES ROCHES VOLCANIQUES DU SILLON DE ROCHES VERTES ARCHÉENNES DE MATAGAMI - CHIBOUGAMU À L^OUEST DE CHAPAIS (ABITIBI EST, QUÉBEC). 2. LE GROUPE HAUTEMENT POTASSIQUE D^OPÉMISCA	6048D	BASALT	49.75	-74.5	2717	0.999539	50.29	0.75	16.57	9.07	0.13	7.83	10.78	2.99	1.38	0.21	30.8	0.98
Southern Volcanic Zone, Superior Province	PHYSICAL VOLCANOLOGY, STRATIGRAPHY, AND LITHOGEOCHEMISTRY OF AN ARCHEAN VOLCANIC ARC: EVOLUTION FROM PLUME-RELATED VOLCANISM TO ARC RIFTING OF SE ABITIBI GREENSTONE BELT, VAL D^OR, CANADA	CS99-2193A	BASALT	48.12	-77.77	2714	0.985673	48.4	0.45	14.6	9.9	0.15	10.5	9.9	2.13	0.05	0.09	1.49	2.46
Kaapvaal Craton	PETROGENESIS OF LATE ARCHEAN FLOOD-TYPE BASIC LAVAS FROM THE KLIPRIVIERSBERG GROUP, VENTERSDORP SUPERGROUP, SOUTH AFRICA	KL-138	BASALT	-26.87	26.67	2714	0.983611	51.82	0.69	15.13	10.75	0.2	6.84	8.46	3.37	1.46	0.087	9	1.45
Kaapvaal Craton	PETROGENESIS OF LATE ARCHEAN FLOOD-TYPE BASIC LAVAS FROM THE KLIPRIVIERSBERG GROUP, VENTERSDORP SUPERGROUP, SOUTH AFRICA	KL-146	BASALT	-26.87	26.67	2714	0.995685	51.77	0.52	12.72	9.97	0.19	12.87	7.19	1.98	1.6	0.078	6.7	1.34
Kaapvaal Craton	PETROGENESIS OF LATE ARCHEAN FLOOD-TYPE BASIC LAVAS FROM THE KLIPRIVIERSBERG GROUP, VENTERSDORP SUPERGROUP, SOUTH AFRICA	KL-154	BASALT	-26.87	26.67	2714	0.995513	53.59	0.48	12.73	9.71	0.18	10.75	7.75	2.16	1.52	0.07	8.2	1.26
Kaapvaal Craton	PETROGENESIS OF LATE ARCHEAN FLOOD-TYPE BASIC LAVAS FROM THE KLIPRIVIERSBERG GROUP, VENTERSDORP SUPERGROUP, SOUTH AFRICA	KL-141	BASALT	-26.87	26.67	2714	0.998576	52.54	0.57	11.87	10.52	0.18	10.6	9.21	1.58	1.68	0.078	4.3	1.18
Kaapvaal Craton	PETROGENESIS OF LATE ARCHEAN FLOOD-TYPE BASIC LAVAS FROM THE KLIPRIVIERSBERG GROUP, VENTERSDORP SUPERGROUP, SOUTH AFRICA	KL-135	BASALT	-26.87	26.67	2714	0.970382	53.1	0.49	10.35	10.69	0.18	13.62	8.29	1.85	0.18	0.046	4.8	1.08
Abitibi	A 2.7 GA DEPLETED THOLEIITE SUITE: EVIDENCE OF PLUME-ARC INTERACTION IN THE ABITIBI GREENSTONE BELT, CANADA	V44-3	THOLEIITE	48.12	-77.77	2713.5	0.972293	50.34	0.46	18.04	10.66	0.18	10.91	6.46	0.05	1.82	0.03	1.34	1.78
Yilgarn, WESTERN AUSTRALIA	ARCHEAN BASIC VOLCANISM IN THE EASTERN GOLDFIELDS PROVINCE, YILGARN BLOCK, WESTERN AUSTRALIA	2	BASALT	-31.2	121.67	2711.5	0.994483	49	0.91	14.4	12.01	0.2	7.24	10.24	3.26	0.13	0.07	2.54	2.42
Yilgarn, WESTERN AUSTRALIA	ARCHEAN BASIC VOLCANISM IN THE EASTERN GOLDFIELDS PROVINCE, YILGARN BLOCK, WESTERN AUSTRALIA	1	BASALT	-31.2	121.67	2711.5	0.983841	49.5	0.89	15.3	11.36	0.21	7.23	11.98	2.21	0.15	0.08	2.48	2.34
Yilgarn, WESTERN AUSTRALIA	ARCHEAN BASIC VOLCANISM IN THE EASTERN GOLDFIELDS PROVINCE, YILGARN BLOCK, WESTERN AUSTRALIA	9	BASALT	-31.2	121.67	2711.5	0.989273	51.6	0.67	14.4	10.62	0.19	8.03	11.5	1.72	0.11	0.06	2.24	1.88
Yilgarn, WESTERN AUSTRALIA	ARCHEAN BASIC VOLCANISM IN THE EASTERN GOLDFIELDS PROVINCE, YILGARN BLOCK, WESTERN AUSTRALIA	10	BASALT	-31.2	121.67	2711.5	0.98105	50.6	0.68	14.2	10.54	0.2	8.65	12.16	1.57	0.07	0.06	2.12	1.87
Yilgarn, WESTERN AUSTRALIA	ARCHEAN BASIC VOLCANISM IN THE EASTERN GOLDFIELDS PROVINCE, YILGARN BLOCK, WESTERN AUSTRALIA	21	BASALT	-31.2	121.67	2711.5	0.988823	52.3	0.59	12.42	10.12	0.18	9.77	10.39	1.46	0.46	0.06	8.85	1.71
Yilgarn, WESTERN AUSTRALIA	ARCHEAN BASIC VOLCANISM IN THE EASTERN GOLDFIELDS PROVINCE, YILGARN BLOCK, WESTERN AUSTRALIA	32	BASALT	-31.2	121.67	2711.5	0.988301	53.7	0.75	16.4	8.34	0.13	7.4	7.78	3.69	0.09	0.07	3.04	1.57
Yilgarn	MAGNESIAN DYKE SUITES OF THE 2.7 GA KAMBALDA SEQUENCE, WESTERN AUSTRALIA: EVIDENCE FOR COEVAL MELTING OF PLUME ASTHENOSPHERE AND METASOMATISED LITHOSPHERIC MANTLE	MRD001-2	BASALT	-32.2	121.77	2711.5	0.950696	47.81	0.5	10.12	10.82	0.2	16.53	7.3	0.26	0.24	0.04	1.9	1.32
Yilgarn	GEOCHEMISTRY OF COEXISTING DEPLETED AND ENRICHED PARINGA BASALTS, IN THE 2.7 GA KALGOORLIE TERRANE, YILGARN CRATON, WESTERN AUSTRALIA: EVIDENCE FOR A HETEROGENEOUS MANTLE PLUME EVENT	SE13-3	BASALT	-31.2	121.67	2710	0.944501	52.5	0.69	14.05	9.85	0.17	7.19	9.4	2.21	0.48	0.07	9.88	1.88
Yilgarn	GEOCHEMISTRY OF COEXISTING DEPLETED AND ENRICHED PARINGA BASALTS, IN THE 2.7 GA KALGOORLIE TERRANE, YILGARN CRATON, WESTERN AUSTRALIA: EVIDENCE FOR A HETEROGENEOUS MANTLE PLUME EVENT	SE13-4	BASALT	-31.2	121.67	2710	0.970597	52.28	0.65	13.25	9.79	0.17	7.95	9.73	1.66	0.69	0.07	9.96	1.81
western Churchill Province	PETROGENESIS OF NEOARCHAEAN VOLCANIC ROCKS OF THE MACQUOID SUPRACRUSTAL BELT: A BACK-ARC SETTING FOR THE NORTHWESTERN HEARNE SUBDOMAIN, WESTERN CHURCHILL PROVINCE, CANADA	98J131B	BASALT	62	-92	2710	0.991145	48	0.63	15.3	10.62	0.19	8.1	13.51	1	0.16	0.05	1.8	1.8
Yilgarn	GEOCHEMISTRY OF COEXISTING DEPLETED AND ENRICHED PARINGA BASALTS, IN THE 2.7 GA KALGOORLIE TERRANE, YILGARN CRATON, WESTERN AUSTRALIA: EVIDENCE FOR A HETEROGENEOUS MANTLE PLUME EVENT	KD330-4	BASALT	-31.2	121.67	2710	0.997369	51.88	0.6	12.5	9.9	0.17	10.47	7.87	2.71	0.68	0.06	6.52	1.62
Yilgarn	GEOCHEMISTRY OF COEXISTING DEPLETED AND ENRICHED PARINGA BASALTS, IN THE 2.7 GA KALGOORLIE TERRANE, YILGARN CRATON, WESTERN AUSTRALIA: EVIDENCE FOR A HETEROGENEOUS MANTLE PLUME EVENT	KD330-1	BASALT	-31.2	121.67	2710	0.990771	51.22	0.61	12.56	10.04	0.16	9.78	7.53	1.89	0.32	0.06	8.4	1.57
Yilgarn	GEOCHEMISTRY OF COEXISTING DEPLETED AND ENRICHED PARINGA BASALTS, IN THE 2.7 GA KALGOORLIE TERRANE, YILGARN CRATON, WESTERN AUSTRALIA: EVIDENCE FOR A HETEROGENEOUS MANTLE PLUME EVENT	CD339W3-1	BASALT	-31.2	121.67	2710	0.906601	47.87	0.63	13.01	9.03	0.15	6.16	8.68	1.59	0.4	0.06	9.57	1.44
western Churchill Province	PETROGENESIS OF NEOARCHAEAN VOLCANIC ROCKS OF THE MACQUOID SUPRACRUSTAL BELT: A BACK-ARC SETTING FOR THE NORTHWESTERN HEARNE SUBDOMAIN, WESTERN CHURCHILL PROVINCE, CANADA	98H058	BASALT	62	-92	2710	0.994754	48.51	0.45	18.01	7.38	0.19	6.83	15.14	1.81	0.28	0.05	2.52	1.4
Yilgarn	GEOCHEMISTRY OF COEXISTING DEPLETED AND ENRICHED PARINGA BASALTS, IN THE 2.7 GA KALGOORLIE TERRANE, YILGARN CRATON, WESTERN AUSTRALIA: EVIDENCE FOR A HETEROGENEOUS MANTLE PLUME EVENT	SE10-5	BASALT	-31.2	121.67	2710	0.980054	50.4	0.62	11.95	10.53	0.18	11.61	8.51	1.51	0.27	0.07	9.63	1.36
Yilgarn	GEOCHEMISTRY OF COEXISTING DEPLETED AND ENRICHED PARINGA BASALTS, IN THE 2.7 GA KALGOORLIE TERRANE, YILGARN CRATON, WESTERN AUSTRALIA: EVIDENCE FOR A HETEROGENEOUS MANTLE PLUME EVENT	SE13-22D	BASALT	-31.2	121.67	2710	0.96844	52.14	0.49	9.85	9.93	0.19	13.64	7.32	0.93	0.62	0.05	7.06	1.28
Yilgarn	GEOCHEMISTRY OF COEXISTING DEPLETED AND ENRICHED PARINGA BASALTS, IN THE 2.7 GA KALGOORLIE TERRANE, YILGARN CRATON, WESTERN AUSTRALIA: EVIDENCE FOR A HETEROGENEOUS MANTLE PLUME EVENT	CD339W3-6	BASALT	-31.2	121.67	2710	0.992576	51.48	0.41	8.41	10.05	0.18	16.98	6.52	1.11	0.13	0.04	5.87	1.07
Yilgarn	GEOCHEMISTRY OF COEXISTING DEPLETED AND ENRICHED PARINGA BASALTS, IN THE 2.7 GA KALGOORLIE TERRANE, YILGARN CRATON, WESTERN AUSTRALIA: EVIDENCE FOR A HETEROGENEOUS MANTLE PLUME EVENT	CD339W3-7	BASALT	-31.2	121.67	2710	0.99702	50.46	0.43	8.68	10.22	0.19	16.55	6.78	0.41	0.8	0.04	4.81	1.05
Yilgarn	GEOCHEMISTRY OF COEXISTING DEPLETED AND ENRICHED PARINGA BASALTS, IN THE 2.7 GA KALGOORLIE TERRANE, YILGARN CRATON, WESTERN AUSTRALIA: EVIDENCE FOR A HETEROGENEOUS MANTLE PLUME EVENT	SE10-3	BASALT	-31.2	121.67	2710	0.993632	49.96	0.51	10.72	10.14	0.18	12.69	8.81	0.61	1	0.06	7.36	1.04
Superior	THE GEOCHEMISTRY OF NEOARCHEAN (CA. 2700 MA) THOLEIITIC BASALTS, TRANSITIONAL TO ALKALINE BASALTS, AND GABBROS, WAWA SUBPROVINCE, CANADA: IMPLICATIONS FOR PETROGENETIC AND GEODYNAMIC PROCESSES	93-15	BASALT	49	-85.5	2706	0.971038	47.6	2.8	13	15.93	0.2	6	8.9	2.5	0.7	0.4	9.6	3.1
Abitibi	THE GEOCHEMISTRY AND EVOLUTION OF THE VOLCANIC ROCKS OF THE CHIBOUGAMAU REGION OF THE ABITIBI METAVOLCANIC BELT	2	BASALT	48	-78	2705	0.999261	49.73	1.24	14.62	12.64		7.39	8.2	2.62	0.13	0.11	3.2	2.85
Abitibi	QUANTITATIVE TRACE-ELEMENT MODELLING OF THE CRYSTALLIZATION HISTORY OF THE KINOJÉVIS AND BLAKE RIVER GROUPS, ABITIBI GREENSTONE BELT, ONTARIO	86-6A	BASALT	48.5	-79.03	2704	0.992845	52.45	1.05	16.44	8.55	0.13	6.74	8.56	2.25	0.47	0.04	10	1.9
Abitibi	QUANTITATIVE TRACE-ELEMENT MODELLING OF THE CRYSTALLIZATION HISTORY OF THE KINOJÉVIS AND BLAKE RIVER GROUPS, ABITIBI GREENSTONE BELT, ONTARIO	F-637	BASALT	48.4	-81.3	2704	0.999813	50.36	0.95	13.99	11.11	0.19	8.13	11.48	1.39	0.19	0.04	1.69	1.81
North China Craton	GEOCHEMICAL CHARACTERISTICS OF THE NEOARCHEAN (2800-2700 MA) TAISHAN GREENSTONE BELT, NORTH CHINA CRATON: EVIDENCE FOR PLUME-CRATON INTERACTION	2004-24	BASALT	36.0633	117.573	2704	0.989934	49.65	0.33	15.07	12.32	0.21	7.07	10.72	2.46	0.12		2.63	1.75
North China Craton	GEOCHEMICAL CHARACTERISTICS OF THE NEOARCHEAN (2800-2700 MA) TAISHAN GREENSTONE BELT, NORTH CHINA CRATON: EVIDENCE FOR PLUME-CRATON INTERACTION	2004-46A	BASALT	36.4283	117.466	2704	0.95434	51.72	0.33	14.48	11.66	0.2	6.5	9.79	2.83	0.67		4.38	1.74
North China Craton	GEOCHEMICAL CHARACTERISTICS OF THE NEOARCHEAN (2800-2700 MA) TAISHAN GREENSTONE BELT, NORTH CHINA CRATON: EVIDENCE FOR PLUME-CRATON INTERACTION	2004-46B	BASALT	36.4283	117.466	2704	0.982968	51.63	0.33	14.17	11.75	0.2	6.82	9.93	2.74	0.64		3.05	1.53
North China Craton	GEOCHEMICAL CHARACTERISTICS OF THE NEOARCHEAN (2800-2700 MA) TAISHAN GREENSTONE BELT, NORTH CHINA CRATON: EVIDENCE FOR PLUME-CRATON INTERACTION	2004-19	BASALT	36.0612	117.571	2704	0.985318	51.49	0.33	11.69	10.66	0.19	10.77	11.31	1.9	0.18		2.72	1.14
North China Craton	GEOCHEMICAL CHARACTERISTICS OF THE NEOARCHEAN (2800-2700 MA) TAISHAN GREENSTONE BELT, NORTH CHINA CRATON: EVIDENCE FOR PLUME-CRATON INTERACTION	2004-22	BASALT	36.061	117.569	2704	0.978705	51.78	0.33	7.06	9.24	0.19	16.76	12.5	0.77	0.3		1.36	0.58
North China Craton	GEOCHEMICAL CHARACTERISTICS OF THE NEOARCHEAN (2800-2700 MA) TAISHAN GREENSTONE BELT, NORTH CHINA CRATON: EVIDENCE FOR PLUME-CRATON INTERACTION	2004-25	BASALT	36.0345	117.6	2704	0.9901	49.57	0.33	9.55	13.09	0.31	11.64	12.32	0.81	0.48		0.85	0.51
esatern Dharwar	BONINITES FROM THE NEOARCHAEAN GADWAL GREENSTONE BELT, EASTERN DHARWAR CRATON, INDIA: IMPLICATIONS FOR ARCHAEAN SUBDUCTION PROCESSES	THOLEIITE	THOLEIITE	15.5	77.5	2702	0.971687	51.62	1.91	12.8	10.72	0.13	6.72	11.03	3.32	0.27	0.3	3.09	1.84
Yilgarn	PHOSPHORUS AND HIGH FIELD STRENGTH ELEMENT ANOMALIES IN ARCHEAN HIGH-MAGNESIAN MAGMAS AS POSSIBLE INDICATORS OF SOURCE MINERALOGY AND DEPTH	372682	BASALT	-32.2	121.77	2702	0.977847	45.5	0.56	12.1	12.06	0.23	14.8	7.77	1.06	0.09	0.05	1.83	1.44
Yilgarn	PHOSPHORUS AND HIGH FIELD STRENGTH ELEMENT ANOMALIES IN ARCHEAN HIGH-MAGNESIAN MAGMAS AS POSSIBLE INDICATORS OF SOURCE MINERALOGY AND DEPTH	372679	BASALT	-32.2	121.77	2702	0.938451	48.4	0.54	11.7	10.98	0.21	12.8	8.2	0.81	0.09	0.05	1.81	1.39
Rae Province, Canada	THE ARCHEAN MURMAC BAY GROUP: EVIDENCE FOR A GIANT ARCHEAN RIFT IN THE RAE PROVINCE, CANADA	4700-0024	BASALT	59.6	-109	2700.5	0.999861	48.37	1.27	14.4	12.06	0.191	7.79	10.24	2.03	0.85	0.14	8.52	2.83
Superior Province	HIGH-PRECISION EXPLORATION GEOCHEMISTRY: APPLICATIONS FOR VOLCANOGENIC MASSIVE SULFIDE DEPOSITS	KC-506-B	THOLEIITE	48.7	-81.4	2700	0.918032	52.55	0.31	15.94	8.8	0.2	12.8	3.79	4.6		0.04	1.22	1.89
Abitibi	TRACE ELEMENT CHARACTERISTICS OF KOMATIITES AND KOMATIITIC BASALTS FROM THE ABITIBI METAVOLCANIC BELT OF QUEBEC	3	BASALT	48.5	-79.2	2700	0.998814	51.4	0.8	12.9	7.9		11.1	7.9	3.7	0.1	0.05	3	1.7
Pilbara	A COMPARATIVE STUDY OF THE GEOCHEMICAL AND ISOTOPIC SYSTEMATICS OF LATE ARCHEAN FLOOD BASALTS FROM THE PILBARA AND KAAPVAAL CRATONS	GSWA100529	BASALT	-25.87	24.73	2700	0.938638	52.1	0.64	12.8	9.8	0.18	7.56	9.57	2.7	0.58	0.07	8.6	1.56
Abitibi	TRACE ELEMENT CHARACTERISTICS OF KOMATIITES AND KOMATIITIC BASALTS FROM THE ABITIBI METAVOLCANIC BELT OF QUEBEC	5	BASALT	48.5	-79.2	2700	0.991048	50.7	0.5	8.6	8.6		16.6	10.2	1.1	0.01	0.03	2.2	1.5
Western Churchill Province	NEOARCHAEAN VOLCANIC ROCKS, CENTRAL HEARNE SUPRACRUSTAL BELT, WESTERN CHURCHILL PROVINCE, CANADA: GEOCHEMICAL AND ISOTOPIC EVIDENCE SUPPORTING INTRA-OCEANIC SUPRA-SUBDUCTION ZONE EXTENSION	HS541	BASALT	62	-94.5	2700	0.906996	49.3	0.56	14.9	9.36	0.14	9.02	10.76	1	0.04	0.04	1.6	1.5
Yilgarn, WESTERN AUSTRALIA	ARCHEAN BASIC VOLCANISM IN THE EASTERN GOLDFIELDS PROVINCE, YILGARN BLOCK, WESTERN AUSTRALIA	12	BASALT	-31.7	121.67	2700	0.992729	51.1	0.72	14.9	10.13	0.18	7.77	11.93	1.48	0.08	0.06	1.74	1.38
Western Dharwar	GEOCHEMISTRY OF TWO STRATIGRAPHICALLY-RELATED ULTRAMAFIC (KOMATIITE) LAYERS FROM THE NEOARCHEAN SIGEGUDDA GREENSTONE TERRANE, WESTERN DHARWAR CRATON, INDIA: EVIDENCE FOR COMPOSITIONAL DIVERSITY IN ARCHEAN MANTLE PLUMES	SIG-114	BASALT	13.08	76	2700	0.978158	50.8	0.84	12.13	9.09	0.15	16.9	3.96	0.09	0.05	0.18	5.52	1.32
Superior Province	AN ARCHEAN ARC BASALT-NB-ENRICHED BASALT-ADAKITE ASSOCIATION: THE 2.7 GA CONFEDERATION ASSEMBLAGE OF THE BIRCH-UCHI GREENSTONE BELT, SUPERIOR PROVINCE	SL87-05	BASALT	51	-91	2700	0.995555	49.95	0.57	18.02	9.49	0.27	8.57	8.09	3.9	0.05	0.04	4.66	0.9
Superior	GEOCHEMICAL EVOLUTION IN THE BLAKE RIVER GROUP, ABITIBI GREENSTONE BELT, SUPERIOR PROVINCE	592	BASALT	48.28	-80.23	2699.5	0.994825	47.49	0.33	15.43	9.61	0.18	6.63	12.43	2.15	0.16	0.43	24.9	2.6
Superior	GEOCHEMICAL EVOLUTION IN THE BLAKE RIVER GROUP, ABITIBI GREENSTONE BELT, SUPERIOR PROVINCE	593	BASALT	48.28	-80.23	2699.5	0.994917	50.29	0.33	16.9	9.76	0.15	7.29	4.15	4.41	0.09	0.2	13.1	2.5
Superior	GEOCHEMICAL EVOLUTION IN THE BLAKE RIVER GROUP, ABITIBI GREENSTONE BELT, SUPERIOR PROVINCE	603	THOLEIITE	48.28	-80.23	2699.5	0.998621	50.15	0.33	14.74	9.67	0.13	8.46	10.68	1.87	0.51	0.04	2.3	2.1
Superior	GEOCHEMICAL EVOLUTION IN THE BLAKE RIVER GROUP, ABITIBI GREENSTONE BELT, SUPERIOR PROVINCE	596	BASALT	48.28	-80.23	2699.5	0.997454	52.97	0.33	14.17	9.67	0.14	8.43	4.39	3.74	0.45	0.17	10	2
Superior	GEOCHEMICAL EVOLUTION IN THE BLAKE RIVER GROUP, ABITIBI GREENSTONE BELT, SUPERIOR PROVINCE	594	BASALT	48.28	-80.23	2699.5	0.993043	50.39	0.33	13.77	11.13	0.2	7.34	9	2.8	0.76	0.07	8.8	1.4
Abitibi, CANADA	ARCHEAN SHOSHONITES FROM THE ABITIBI GREENSTONE BELT, CHIBOUGAMU /QUEBEC, CANADA): GEOCHEMISTRY AND TECTONIC SETTING	JW-18	BASALT	49.87	-74.35	2697.5	0.948269	53.86	0.5	12.96	5.52	0.13	6.42	7.19	4.4	0.5	0.46	40	1.35
Abitibi, CANADA	ARCHEAN SHOSHONITES FROM THE ABITIBI GREENSTONE BELT, CHIBOUGAMU /QUEBEC, CANADA): GEOCHEMISTRY AND TECTONIC SETTING	JW-15	ANDESITE	49.87	-74.35	2697.5	0.997485	51.74	0.8	12.91	7.31	0.14	6.43	7.23	3.08	0.8	0.26	25.7	1.12
Yilgarn Craton	ELEMENTAL AND ND-ISOTOPE SYSTEMATICS OF THE UPPER BASALT UNIT, 2.7 GA KAMBALDA SEQUENCE: QUANTITATIVE MODELING OF PROGRESSIVE CRUSTAL CONTAMINATION OF PLUME ASTHENOSPHERE	687-3	BASALT	-31.3792	121.774	2697	0.911074	52.81	0.67	14.53	8.8	0.15	6.57	10.51	3.57	0.55	0.08	3.81	2.11
Yilgarn Craton	ELEMENTAL AND ND-ISOTOPE SYSTEMATICS OF THE UPPER BASALT UNIT, 2.7 GA KAMBALDA SEQUENCE: QUANTITATIVE MODELING OF PROGRESSIVE CRUSTAL CONTAMINATION OF PLUME ASTHENOSPHERE	36-2	BASALT	-30.2593	120.907	2697	0.968349	49.68	0.5	14.09	10.05	0.19	10.77	8.71	2.27	0.16	0.05	1.63	1.39
Yilgarn Craton	ELEMENTAL AND ND-ISOTOPE SYSTEMATICS OF THE UPPER BASALT UNIT, 2.7 GA KAMBALDA SEQUENCE: QUANTITATIVE MODELING OF PROGRESSIVE CRUSTAL CONTAMINATION OF PLUME ASTHENOSPHERE	OB1	BASALT	-30.3075	120.993	2697	0.938821	46.64	0.41	11.21	9.96	0.21	16.65	9	1.23	0.07	0.04	1.25	1.2
Dharwar Craton	PETROGENESIS OF AMPHIBOLITES IN THE KOLAR SCHIST BELT, INDIA - A PRELIMINARY REPORT	18-14	BASALT	13.13	78.13	2696	0.999404	50.74	1.14	14.79	12.47	0.15	7.17	11.81	2.01	0.07		3.1	2.46
Dharwar Craton	PETROGENESIS OF AMPHIBOLITES IN THE KOLAR SCHIST BELT, INDIA - A PRELIMINARY REPORT	16-8	THOLEIITE	13.13	78.13	2696	0.999513	51.27	0.72	16.6	10.33	0.18	6.83	11.82	1.79	0.07		1.86	1.94
Yilgarn, WESTERN AUSTRALIA	ARCHAEAN MAFIC MAGMATISM IN THE KALGOORLIE AREA OF THE YILGARN CRATON, WESTERN AUSTRALIA: A GEOCHEMICAL AND ND ISOTOPIC STUDY OF THE PETROGENETIC AND TECTONIC EVOLUTION OF A GREENSTONE BELT	K374	BASALT	-30.75	121.45	2696	0.913497	47.84	0.62	13.57	8.95	0.19	7.17	12.3	2.3	0.01	0.08	4.19	1.79
Dharwar Craton	PETROGENESIS OF AMPHIBOLITES IN THE KOLAR SCHIST BELT, INDIA - A PRELIMINARY REPORT	18-10	BASALT	13.13	78.13	2696	0.995125	45.05	1.3	11.89	14.16	0.23	14.97	10.79	0.7	0.06		4.73	1.73
Dharwar Craton	PETROGENESIS OF AMPHIBOLITES IN THE KOLAR SCHIST BELT, INDIA - A PRELIMINARY REPORT	13-4	BASALT	13.13	78.13	2696	0.99909	46.43	1.17	11.67	14.02	0.17	14.06	10.88	0.86	0.14		5.6	1.7
Yilgarn, WESTERN AUSTRALIA	ARCHAEAN MAFIC MAGMATISM IN THE KALGOORLIE AREA OF THE YILGARN CRATON, WESTERN AUSTRALIA: A GEOCHEMICAL AND ND ISOTOPIC STUDY OF THE PETROGENETIC AND TECTONIC EVOLUTION OF A GREENSTONE BELT	K372	BASALT	-30.75	121.45	2696	0.934394	46.48	0.62	13.21	8.88	0.21	6.99	9.75	2.98	0.02	0.08	3.69	1.46
Yilgarn, WESTERN AUSTRALIA	ARCHAEAN MAFIC MAGMATISM IN THE KALGOORLIE AREA OF THE YILGARN CRATON, WESTERN AUSTRALIA: A GEOCHEMICAL AND ND ISOTOPIC STUDY OF THE PETROGENETIC AND TECTONIC EVOLUTION OF A GREENSTONE BELT	K354	THOLEIITE	-30.75	121.45	2696	0.915584	49.52	0.57	10.94	10.18	0.21	13.57	7.2	2.21	0.07	0.09	6.62	0.94
Yilgarn	RECONSTRUCTING THE EVENT STRATIGRAPHY FROM THE COMPLEX STRUCTURAL - STRATIGRAPHIC ARCHITECTURE OF AN ARCHAEAN VOLCANIC - INTRUSIVE - SEDIMENTARY SUCCESSION: THE BOORARA DOMAIN, EASTERN GOLDFIELDS SUPERTERRANE, WESTERN AUSTRALIA	HLPXM	BASALT	-30.5147	121.584	2686.5	0.999507	50.2		12.6			6.1					3.5	1.8
Slave Province	DEVELOPMENT OF AN ANCIENT BACK-ARC BASIN OVERLYING CONTINENTAL CRUST: THE ARCHEAN PELTIER FORMATION, NORTHWEST TERRITORIES, CANADA	L6-11	THOLEIITE	65.25	-113.53	2680	0.96853	48	1.08	13.97	12.31	0.21	6.97	7.76	2.44	1.13	0.08	4.12	2.56
Slave Province	DEVELOPMENT OF AN ANCIENT BACK-ARC BASIN OVERLYING CONTINENTAL CRUST: THE ARCHEAN PELTIER FORMATION, NORTHWEST TERRITORIES, CANADA	L6-10B	basalt	65.25	-113.53	2680	0.991076	48.62	0.88	14.95	11.3	0.19	6.88	10.29	2.14	0.46	0.06	3.09	2.3
Slave Province	DEVELOPMENT OF AN ANCIENT BACK-ARC BASIN OVERLYING CONTINENTAL CRUST: THE ARCHEAN PELTIER FORMATION, NORTHWEST TERRITORIES, CANADA	L6-6B	THOLEIITE	65.25	-113.53	2680	0.926749	45.98	0.9	14.47	11.32	0.21	8.73	11.31	1.65	0.08	0.06	3.02	2.09
Slave Province	DEVELOPMENT OF AN ANCIENT BACK-ARC BASIN OVERLYING CONTINENTAL CRUST: THE ARCHEAN PELTIER FORMATION, NORTHWEST TERRITORIES, CANADA	L6-9B	basalt	65.25	-113.53	2680	0.974146	48.14	0.58	15.34	10.55	0.19	8.81	7.79	3.11	0.4	0.04	1.72	1.46
Slave Province	DEVELOPMENT OF AN ANCIENT BACK-ARC BASIN OVERLYING CONTINENTAL CRUST: THE ARCHEAN PELTIER FORMATION, NORTHWEST TERRITORIES, CANADA	C6-77	basalt	65.25	-113.53	2680	0.961321	47.24	1.11	15.37	12.42	0.2	8.26	4.51	2.22	3.02	0.07	28.91	0.71
Zimbabwe	THE GEOCHEMISTRY OF ULTRAMAFIC TO MAFIC VOLCANICS FROM THE BELINGWE GREENSTONE BELT, ZIMBABWE: MAGMATISM IN THE ARCHEAN CONTINENTAL LARGE IGNEOUS PROVINCE	BX153	BASALT	-20.33	30.03	2672	0.998459	50.25	1.25	13.79	11.82	0.26	6.2	10.85	1.68	0.1	0.11	3.5	3.1
Zimbabwe	THE GEOCHEMISTRY OF ULTRAMAFIC TO MAFIC VOLCANICS FROM THE BELINGWE GREENSTONE BELT, ZIMBABWE: MAGMATISM IN THE ARCHEAN CONTINENTAL LARGE IGNEOUS PROVINCE	BX240	BASALT	-20.33	30.03	2672	0.981169	47.73	0.75	14.67	11.09	0.19	8.43	11.73	1.28	0.15	0.064	2.1	2
Zimbabwe	THE GEOCHEMISTRY OF ULTRAMAFIC TO MAFIC VOLCANICS FROM THE BELINGWE GREENSTONE BELT, ZIMBABWE: MAGMATISM IN THE ARCHEAN CONTINENTAL LARGE IGNEOUS PROVINCE	BX252	BASALT	-20.33	30.03	2672	0.999278	48.56	0.74	14.48	10.99	0.19	8.36	11.66	1.67	0.046	0.059	2	2
Zimbabwe	THE GEOCHEMISTRY OF ULTRAMAFIC TO MAFIC VOLCANICS FROM THE BELINGWE GREENSTONE BELT, ZIMBABWE: MAGMATISM IN THE ARCHEAN CONTINENTAL LARGE IGNEOUS PROVINCE	BX248	BASALT	-20.33	30.03	2672	0.971229	48.72	0.73	14.26	10.9	0.19	7.48	13.46	0.82	0.093	0.059	1.9	1.9
Zimbabwe	THE GEOCHEMISTRY OF ULTRAMAFIC TO MAFIC VOLCANICS FROM THE BELINGWE GREENSTONE BELT, ZIMBABWE: MAGMATISM IN THE ARCHEAN CONTINENTAL LARGE IGNEOUS PROVINCE	BX235	BASALT	-20.33	30.03	2672	0.995221	52.19	0.53	14.24	8.29	0.14	9	7.51	3.95	0.015	0.049	2.2	1.7
Zimbabwe	THE GEOCHEMISTRY OF ULTRAMAFIC TO MAFIC VOLCANICS FROM THE BELINGWE GREENSTONE BELT, ZIMBABWE: MAGMATISM IN THE ARCHEAN CONTINENTAL LARGE IGNEOUS PROVINCE	BW495	BASALT	-20.35	30.03	2672	0.971614	53.14	0.55	11.51	9.25	0.14	11.26	7.16	3.04	0.03	0.051	3.1	1.4
Zimbabwe	THE GEOCHEMISTRY OF ULTRAMAFIC TO MAFIC VOLCANICS FROM THE BELINGWE GREENSTONE BELT, ZIMBABWE: MAGMATISM IN THE ARCHEAN CONTINENTAL LARGE IGNEOUS PROVINCE	BX108	BASALT	-20.35	30.03	2672	0.982678	51.04	0.55	11.27	9.95	0.18	11.48	8.54	2.84	0.023	0.051	3	1.4
Zimbabwe	THE GEOCHEMISTRY OF ULTRAMAFIC TO MAFIC VOLCANICS FROM THE BELINGWE GREENSTONE BELT, ZIMBABWE: MAGMATISM IN THE ARCHEAN CONTINENTAL LARGE IGNEOUS PROVINCE	BX119	BASALT	-20.33	30.03	2672	0.927029	51.8	0.56	13.81	9.28	0.16	8.26	10.85	1.68	0.088	0.044	1.2	1.3
Slave Province	GEOCHEMISTRY OF THE LATE ARCHEAN BANTING GROUP, YELLOWKNIFE GREENSTONE BELT, SLAVE PROVINCE, CANADA: SIMULTANEOUS MELTING OF THE UPPER MANTLE AND JUVENILE MAFIC CRUST	98-YK-10	basalt	62.5	-114.5	2660	0.984384	50.95	1.04	15.81	10.51	0.16	6.48	8.46	2.55	0.08	0.11	11.37	2.21
Slave Province	GEOCHEMISTRY OF THE LATE ARCHEAN BANTING GROUP, YELLOWKNIFE GREENSTONE BELT, SLAVE PROVINCE, CANADA: SIMULTANEOUS MELTING OF THE UPPER MANTLE AND JUVENILE MAFIC CRUST	96-YK-14	basalt	62.5	-114.5	2660	0.981695	48.33	0.95	15.09	12.1	0.2	6.72	9.58	2.11	0.18	0.08	8.69	2.19
Southern Bastar Craton	PETROLOGY AND GEOCHEMISTRY OF THE LATE ARCHAEAN SILICEOUS HIGH-MAGNESIAN BASALTS (SHMB) FROM KAKLUR, SOUTHERN BASTAR CRATON, CENTRAL INDIA	279	BASALT	18.9242	81.6096	2594.5	0.963463	52.83	0.35	10.35	10.12	0.18	15.57	6.54	1.08	0.71	0.05	4	0.99
Karnataka	RARE EARTH ELEMENT GEOCHEMISTRY OF METABASALTS FROM KOLAR AND HUTTI GOLD-BEARING VOLCANIC BELTS, KARNATAKA CRATON, INDIA	2	BASALT	13.13	78.13	2586	0.999855	51.02	0.69	12.19	12.52	0.14	6.7	11.23	2.17	0.12	0.14	7.18	4.2
Karnataka	RARE EARTH ELEMENT GEOCHEMISTRY OF METABASALTS FROM KOLAR AND HUTTI GOLD-BEARING VOLCANIC BELTS, KARNATAKA CRATON, INDIA	6	BASALT	16.15	76.65	2586	0.998336	51.01	0.69	13.3	12.42	0.22	7.03	10.62	1.82	0.33	0.13	4.48	2.21
Karnataka	RARE EARTH ELEMENT GEOCHEMISTRY OF METABASALTS FROM KOLAR AND HUTTI GOLD-BEARING VOLCANIC BELTS, KARNATAKA CRATON, INDIA	5	BASALT	16.15	76.65	2586	0.984304	50.36	0.82	13.22	13.26	0.16	7	10.05	2.24	0.3	0.19	4.75	1.9
Karnataka	RARE EARTH ELEMENT GEOCHEMISTRY OF METABASALTS FROM KOLAR AND HUTTI GOLD-BEARING VOLCANIC BELTS, KARNATAKA CRATON, INDIA	3	BASALT	13.13	78.13	2586	0.987031	49.35	0.75	12.21	13.31	0.21	8.95	10.61	2.23	0.18	0.15	1.51	0.68
Central Gawler Craton	PROVENANCE AND TECTONIC DEVELOPMENT OF THE LATE ARCHAEAN GAWLER CRATON, AUSTRALIA; U-PB ZIRCON, GEOCHEMICAL AND SM-ND ISOTOPIC IMPLICATIONS	613125	BASALT	-29.8	135.8	2553	0.993456	47.4	0.35	14	8.15	0.17	7.45	7.87	2.53	0.78	0.03	5	1.05
North China Craton	A MORB-ARC BASALT-ADAKITE ASSOCIATION IN THE 2.5 GA WUTAI GREENSTONE BELT: LATE ARCHEAN MAGMATISM AND CRUSTAL GROWTH IN THE NORTH CHINA CRATON	WS59	BASALT	38.5	113	2543	0.923941	50.09	0.9	13.35	12.64	0.23	6.76	10.45	1.14	0.4	0.08	5.69	2.6
North China Craton	A MORB-ARC BASALT-ADAKITE ASSOCIATION IN THE 2.5 GA WUTAI GREENSTONE BELT: LATE ARCHEAN MAGMATISM AND CRUSTAL GROWTH IN THE NORTH CHINA CRATON	WS13	BASALT	38.5	113	2543	0.998713	53.26	0.86	14.83	10.23	0.2	6.48	8.31	2.83	0.57	0.1	6.78	2.24
North China Craton	A MORB-ARC BASALT-ADAKITE ASSOCIATION IN THE 2.5 GA WUTAI GREENSTONE BELT: LATE ARCHEAN MAGMATISM AND CRUSTAL GROWTH IN THE NORTH CHINA CRATON	WS61	BASALT	38.5	113	2543	0.999254	53.68	0.85	13.58	10.67	0.21	6.42	8.31	1.97	1.25	0.27	8.86	2.04
North China Craton	A MORB-ARC BASALT-ADAKITE ASSOCIATION IN THE 2.5 GA WUTAI GREENSTONE BELT: LATE ARCHEAN MAGMATISM AND CRUSTAL GROWTH IN THE NORTH CHINA CRATON	WR22	BASALT	38.5	113	2543	0.9817	49.37	1.17	15.16	12	0.21	6.65	7.52	0.95	2.61	0.15	13.32	2
North China Craton	A MORB-ARC BASALT-ADAKITE ASSOCIATION IN THE 2.5 GA WUTAI GREENSTONE BELT: LATE ARCHEAN MAGMATISM AND CRUSTAL GROWTH IN THE NORTH CHINA CRATON	WS30	BASALT	38.5	113	2543	0.982981	50.32	1.04	14.65	11.26	0.21	7.01	8.87	2.38	0.41	0.04	4.02	1.9
North China Craton	A MORB-ARC BASALT-ADAKITE ASSOCIATION IN THE 2.5 GA WUTAI GREENSTONE BELT: LATE ARCHEAN MAGMATISM AND CRUSTAL GROWTH IN THE NORTH CHINA CRATON	WR9	BASALT	38.5	113	2543	0.959673	49.76	0.81	14.13	12.26	0.24	7.39	10.53	1.53	0.69	0.1	5.12	1.84
North China Craton	A MORB-ARC BASALT-ADAKITE ASSOCIATION IN THE 2.5 GA WUTAI GREENSTONE BELT: LATE ARCHEAN MAGMATISM AND CRUSTAL GROWTH IN THE NORTH CHINA CRATON	WR15	BASALT	38.5	113	2543	0.970388	49.09	0.81	13.93	14.77	0.24	7.4	10.27	1.53	0.66	0.08	5.41	1.83
North China Craton	A MORB-ARC BASALT-ADAKITE ASSOCIATION IN THE 2.5 GA WUTAI GREENSTONE BELT: LATE ARCHEAN MAGMATISM AND CRUSTAL GROWTH IN THE NORTH CHINA CRATON	WR13	BASALT	38.5	113	2543	0.971538	49.52	0.77	13.86	12.49	0.22	7.82	10.73	1.13	0.49	0.07	5.49	1.69
North China Craton	A MORB-ARC BASALT-ADAKITE ASSOCIATION IN THE 2.5 GA WUTAI GREENSTONE BELT: LATE ARCHEAN MAGMATISM AND CRUSTAL GROWTH IN THE NORTH CHINA CRATON	WR10	BASALT	38.5	113	2543	0.955033	49.65	0.74	14.08	12.29	0.25	7.5	10.76	1.61	0.58	0.07	4.87	1.62
North China Craton	A MORB-ARC BASALT-ADAKITE ASSOCIATION IN THE 2.5 GA WUTAI GREENSTONE BELT: LATE ARCHEAN MAGMATISM AND CRUSTAL GROWTH IN THE NORTH CHINA CRATON	WR21	BASALT	38.5	113	2543	0.978092	47.99	0.97	15.45	11.36	0.22	9.1	7.81	1.83	1.51	0.09	7.64	1.53
North China Craton	A MORB-ARC BASALT-ADAKITE ASSOCIATION IN THE 2.5 GA WUTAI GREENSTONE BELT: LATE ARCHEAN MAGMATISM AND CRUSTAL GROWTH IN THE NORTH CHINA CRATON	WR20	BASALT	38.5	113	2543	0.97248	45.3	0.82	14.56	11.3	0.2	12.3	5.36	0.66	4.01	0.08	7.47	1.39
North China Craton	GEOCHEMISTRY OF NEOARCHEAN (CA. 2.55-2.50 GA) VOLCANIC AND OPHIOLITIC ROCKS IN THE WUTAISHAN GREENSTONE BELT, CENTRAL OROGENIC BELT, NORTH CHINA CRATON: IMPLICATIONS FPR GEODYNAMIC SETTING AND CONTINENTAL GROWTH	2002-63	BASALT	38.8669	113.714	2525	0.965264	50.6	1.23	15.42	11.85	0.19	6.8	9.48	1.94	1.02	0.14	10.56	1.97
North China Craton	GEOCHEMISTRY OF NEOARCHEAN (CA. 2.55-2.50 GA) VOLCANIC AND OPHIOLITIC ROCKS IN THE WUTAISHAN GREENSTONE BELT, CENTRAL OROGENIC BELT, NORTH CHINA CRATON: IMPLICATIONS FPR GEODYNAMIC SETTING AND CONTINENTAL GROWTH	2002-64A	BASALT	38.8689	113.714	2525	0.997932	50.6	0.97	15.58	10.37	0.2	7.64	9.67	2.95	0.77	0.1	6.23	1.45
Himalayan belt	SM-ND AGE AND PETROGENESIS OF RAMPUR METAVOLCANIC ROCKS, NW HIMALAYAS: LATE ARCHAEAN RELICS IN THE HIMALAYAN BELT	Rj2	THOLEIITE	31	77	2510	0.951197	51.28	1.02	14.48	10.88	0.2	6.05	8.1	3.2	2.27	0.18	8.47	1.96
Himalayan belt	SM-ND AGE AND PETROGENESIS OF RAMPUR METAVOLCANIC ROCKS, NW HIMALAYAS: LATE ARCHAEAN RELICS IN THE HIMALAYAN BELT	Rj6	THOLEIITE	31	77	2510	0.951163	53.71	0.81	15.29	8.7	0.15	6.46	7.02	3.29	1.68	0.1	14.94	1.9

## Sheet: P-T
Craton	REFERENCE	SAMPLE_ID	ROCK_NAME	LATITUDE	LONGITUDE	C_AGE	Arc_probability3	T(℃)	P(GPa)	SIO2	TIO2	AL2O3	FEOT	MNO	MGO	CAO	NA2O	K2O	P2O5
SW Greenland	THE ORIGIN OF DECOUPLED HF-ND ISOTOPE COMPOSITIONS IN EOARCHEAN ROCKS FROM SOUTHERN WEST GREENLAND	JEH-2007-19	BASALT	65.0889	-50.1777	3835	0.959361	1317.34	1.0124	53.9	0.7	8.58	10.71	0.19	12.6	9.44	1.51	0.12	0.042
southern West Greenland	THE PETROGENESIS OF ULTRAMAFIC ROCKS IN THE >3.7 GA ISUA SUPRACRUSTAL BELT, SOUTHERN WEST GREENLAND: GEOCHEMICAL EVIDENCE FOR TWO DISTINCT MAGMATIC CUMULATE TRENDS	879324	Basalt	65.092	-50.1414	3805	0.999763	1352.1	1.37105	51.2	0.8	8.71	11.37	0.22	16.58	6.8	1.23	0.16	0.07
southern West Greenland	EVIDENCE FOR SUBDUCTION AT 3.8 GA: GEOCHEMISTRY OF ARC-LIKE METABASALTS FROM THE SOUTHERN EDGE OF THE ISUA SUPRACRUSTAL BELT	JG03/50	BASALT	65.0852	-50.1743	3803	0.907281	1339.25	1.35045	52.6	0.77	9.5	10.98	0.21	10.9	10.8	2.14	0.16	0.05
West Greenland	GEOCHEMISTRY OF THE OLDEST MORB AND OIB IN THE ISUA SUPRACRUSTAL BELT, SOUTHERN WEST GREENLAND: IMPLICATIONS FOR THE COMPOSITION AND TEMPERATURE OF EARLY ARCHEAN UPPER MANTLE	K508	BASALT	65.15	-49.75	3800	0.985484	1553.34	3.42765	49.6	1.25	14.1	16.9	0.21	6.41	9.26	1.42	0.19	0.11
West Greenland	GEOCHEMISTRY OF THE OLDEST MORB AND OIB IN THE ISUA SUPRACRUSTAL BELT, SOUTHERN WEST GREENLAND: IMPLICATIONS FOR THE COMPOSITION AND TEMPERATURE OF EARLY ARCHEAN UPPER MANTLE	K458	BASALT	65.15	-49.75	3800	0.996149	1523.47	3.33	48.3	1.24	14.4	15	0.23	6.37	9.82	2.23	0.23	0.12
West Greenland	GEOCHEMISTRY OF THE OLDEST MORB AND OIB IN THE ISUA SUPRACRUSTAL BELT, SOUTHERN WEST GREENLAND: IMPLICATIONS FOR THE COMPOSITION AND TEMPERATURE OF EARLY ARCHEAN UPPER MANTLE	K421	BASALT	65.15	-49.75	3800	0.976031	1505.23	3.08979	49	1.03	13.9	14.7	0.25	6.9	7.86	3.21		0.1
West Greenland	GEOCHEMISTRY OF THE OLDEST MORB AND OIB IN THE ISUA SUPRACRUSTAL BELT, SOUTHERN WEST GREENLAND: IMPLICATIONS FOR THE COMPOSITION AND TEMPERATURE OF EARLY ARCHEAN UPPER MANTLE	K457	BASALT	65.15	-49.75	3800	0.994251	1495.21	2.85659	49.1	1.03	14	14.5	0.25	6.89	9.79	1.82	0.15	0.1
West Greenland	GEOCHEMISTRY OF THE OLDEST MORB AND OIB IN THE ISUA SUPRACRUSTAL BELT, SOUTHERN WEST GREENLAND: IMPLICATIONS FOR THE COMPOSITION AND TEMPERATURE OF EARLY ARCHEAN UPPER MANTLE	K048	BASALT	65.15	-49.75	3800	0.997422	1485.38	2.70892	49.9	1.03	14.2	14.4	0.27	7.02	10.1	1.55	0.27	0.09
West Greenland	GEOCHEMISTRY OF THE OLDEST MORB AND OIB IN THE ISUA SUPRACRUSTAL BELT, SOUTHERN WEST GREENLAND: IMPLICATIONS FOR THE COMPOSITION AND TEMPERATURE OF EARLY ARCHEAN UPPER MANTLE	K430	BASALT	65.1697	-49.8286	3800	0.998776	1475.7	2.89805	47.3	0.94	14.4	13.6	0.23	7.31	10.7	2.06	0.22	0.09
West Greenland	GEOCHEMISTRY OF THE OLDEST MORB AND OIB IN THE ISUA SUPRACRUSTAL BELT, SOUTHERN WEST GREENLAND: IMPLICATIONS FOR THE COMPOSITION AND TEMPERATURE OF EARLY ARCHEAN UPPER MANTLE	K428	BASALT	65.15	-49.75	3800	0.997521	1468.69	2.75495	48.2	0.89	14.5	13.6	0.25	7.38	10.2	2.08	0.24	0.09
West Greenland	GEOCHEMISTRY OF THE OLDEST MORB AND OIB IN THE ISUA SUPRACRUSTAL BELT, SOUTHERN WEST GREENLAND: IMPLICATIONS FOR THE COMPOSITION AND TEMPERATURE OF EARLY ARCHEAN UPPER MANTLE	K076	BASALT	65.15	-49.75	3800	0.958161	1463.56	2.67699	48.6	1.35	14.5	13.5	0.22	6.82	10.9	1.88	0.31	0.13
West Greenland	GEOCHEMISTRY OF THE OLDEST MORB AND OIB IN THE ISUA SUPRACRUSTAL BELT, SOUTHERN WEST GREENLAND: IMPLICATIONS FOR THE COMPOSITION AND TEMPERATURE OF EARLY ARCHEAN UPPER MANTLE	K345	BASALT	65.15	-49.75	3800	0.980784	1456.37	2.53378	48.8	1.17	14.7	13.4	0.22	6.95	10.8	1.6	0.25	0.11
West Greenland	GEOCHEMISTRY OF THE OLDEST MORB AND OIB IN THE ISUA SUPRACRUSTAL BELT, SOUTHERN WEST GREENLAND: IMPLICATIONS FOR THE COMPOSITION AND TEMPERATURE OF EARLY ARCHEAN UPPER MANTLE	P065	BASALT	65.15	-49.75	3800	0.99219	1420.92	2.2688	49.1	1	15.2	12.6	0.21	7.79	11	1.76	0.23	0.1
West Greenland	GEOCHEMISTRY OF THE OLDEST MORB AND OIB IN THE ISUA SUPRACRUSTAL BELT, SOUTHERN WEST GREENLAND: IMPLICATIONS FOR THE COMPOSITION AND TEMPERATURE OF EARLY ARCHEAN UPPER MANTLE	K695	BASALT	65.1881	-49.7992	3800	0.98624	1418.94	2.16674	49.2	1.02	15.2	12.6	0.2	7.74	11.1	1.35	0.18	0.1
West Greenland	GEOCHEMISTRY OF THE OLDEST MORB AND OIB IN THE ISUA SUPRACRUSTAL BELT, SOUTHERN WEST GREENLAND: IMPLICATIONS FOR THE COMPOSITION AND TEMPERATURE OF EARLY ARCHEAN UPPER MANTLE	K070	BASALT	65.15	-49.75	3800	0.983018	1407.39	2.04196	48.8	0.92	14.9	12.2	0.21	7.72	11.7	1.14	0.1	0.09
West Greenland	GEOCHEMISTRY OF THE OLDEST MORB AND OIB IN THE ISUA SUPRACRUSTAL BELT, SOUTHERN WEST GREENLAND: IMPLICATIONS FOR THE COMPOSITION AND TEMPERATURE OF EARLY ARCHEAN UPPER MANTLE	K672	BASALT	65.15	-49.75	3800	0.99523	1396.53	2.16743	49	1.11	15.5	11.9	0.2	7.68	10.8	2.44	0.16	0.11
West Greenland	GEOCHEMISTRY OF THE OLDEST MORB AND OIB IN THE ISUA SUPRACRUSTAL BELT, SOUTHERN WEST GREENLAND: IMPLICATIONS FOR THE COMPOSITION AND TEMPERATURE OF EARLY ARCHEAN UPPER MANTLE	K004	BASALT	65.15	-49.75	3800	0.963703	1380.29	1.85111	49.5	0.93	15.7	11.6	0.19	7.8	11.6	1.3	0.17	0.1
West Greenland	GEOCHEMISTRY OF THE OLDEST MORB AND OIB IN THE ISUA SUPRACRUSTAL BELT, SOUTHERN WEST GREENLAND: IMPLICATIONS FOR THE COMPOSITION AND TEMPERATURE OF EARLY ARCHEAN UPPER MANTLE	K263	BASALT	65.15	-49.75	3800	0.996901	1379.37	1.92675	49.3	0.69	15.6	11.4	0.19	6.97	11	1.95	0.41	0.08
West Greenland	GEOCHEMISTRY OF THE OLDEST MORB AND OIB IN THE ISUA SUPRACRUSTAL BELT, SOUTHERN WEST GREENLAND: IMPLICATIONS FOR THE COMPOSITION AND TEMPERATURE OF EARLY ARCHEAN UPPER MANTLE	K001	BASALT	65.15	-49.75	3800	0.994476	1378.23	1.91214	48.7	0.83	15.2	11.4	0.2	8.16	11.3	1.56	0.26	0.09
West Greenland	GEOCHEMISTRY OF THE OLDEST MORB AND OIB IN THE ISUA SUPRACRUSTAL BELT, SOUTHERN WEST GREENLAND: IMPLICATIONS FOR THE COMPOSITION AND TEMPERATURE OF EARLY ARCHEAN UPPER MANTLE	K297	BASALT	65.15	-49.75	3800	0.998654	1361.65	1.77005	46.7	0.27	15.7	11.2	0.19	15.8	6	0.53	0.03	0.05
West Greenland	GEOCHEMISTRY OF THE OLDEST MORB AND OIB IN THE ISUA SUPRACRUSTAL BELT, SOUTHERN WEST GREENLAND: IMPLICATIONS FOR THE COMPOSITION AND TEMPERATURE OF EARLY ARCHEAN UPPER MANTLE	K646	BASALT	65.15	-49.75	3800	0.999357	1358.62	1.79621	47.4	0.28	15.8	11.2	0.18	14.7	5.56	1.41	0.04	0.05
West Greenland	GEOCHEMISTRY OF THE OLDEST MORB AND OIB IN THE ISUA SUPRACRUSTAL BELT, SOUTHERN WEST GREENLAND: IMPLICATIONS FOR THE COMPOSITION AND TEMPERATURE OF EARLY ARCHEAN UPPER MANTLE	K566	BASALT	65.15	-49.75	3800	0.998294	1345.46	1.71758	46.9	0.22	15.6	10.7	0.2	13.4	7.92	1.06	0.04	0.05
West Greenland	GEOCHEMISTRY OF THE OLDEST MORB AND OIB IN THE ISUA SUPRACRUSTAL BELT, SOUTHERN WEST GREENLAND: IMPLICATIONS FOR THE COMPOSITION AND TEMPERATURE OF EARLY ARCHEAN UPPER MANTLE	K158	BASALT	65.15	-49.75	3800	0.999026	1339.97	1.65883	48.3	0.37	18.5	10.7	0.15	9.32	8.13	1.01	0.72	0.05
West Greenland	GEOCHEMISTRY OF THE OLDEST MORB AND OIB IN THE ISUA SUPRACRUSTAL BELT, SOUTHERN WEST GREENLAND: IMPLICATIONS FOR THE COMPOSITION AND TEMPERATURE OF EARLY ARCHEAN UPPER MANTLE	K736	BASALT	65.15	-49.75	3800	0.99477	1311.91	1.68022	46.4	0.27	17.4	9.58	0.23	11.4	10.3	1.43	0.18	0.05
West Greenland	GEOCHEMISTRY OF THE OLDEST MORB AND OIB IN THE ISUA SUPRACRUSTAL BELT, SOUTHERN WEST GREENLAND: IMPLICATIONS FOR THE COMPOSITION AND TEMPERATURE OF EARLY ARCHEAN UPPER MANTLE	K307	BASALT	65.15	-49.75	3800	0.999376	1309.4	1.4727	46.9	0.27	17.7	9.84	0.18	12.7	7.77	0.74	0.1	0.05
West Greenland	GEOCHEMISTRY OF THE OLDEST MORB AND OIB IN THE ISUA SUPRACRUSTAL BELT, SOUTHERN WEST GREENLAND: IMPLICATIONS FOR THE COMPOSITION AND TEMPERATURE OF EARLY ARCHEAN UPPER MANTLE	K733	BASALT	65.15	-49.75	3800	0.993099	1306.92	1.52633	46.8	0.26	17	9.57	0.23	11.6	10.5	0.88	0.18	0.05
West Greenland	GEOCHEMISTRY OF THE OLDEST MORB AND OIB IN THE ISUA SUPRACRUSTAL BELT, SOUTHERN WEST GREENLAND: IMPLICATIONS FOR THE COMPOSITION AND TEMPERATURE OF EARLY ARCHEAN UPPER MANTLE	(Pillow) core	BASALT	65.15	-49.75	3800	0.997537	1303.71	1.41795	50.3	0.32	17.6	9.81	0.2	8.47	9.34	2.34	0.13	0.06
West Greenland	GEOCHEMISTRY OF THE OLDEST MORB AND OIB IN THE ISUA SUPRACRUSTAL BELT, SOUTHERN WEST GREENLAND: IMPLICATIONS FOR THE COMPOSITION AND TEMPERATURE OF EARLY ARCHEAN UPPER MANTLE	K023	BASALT	65.15	-49.75	3800	0.999382	1302.13	1.36744	47.3	0.23	16.1	9.68	0.2	14.7	7.12	0.57	0.14	0.05
West Greenland	GEOCHEMISTRY OF THE OLDEST MORB AND OIB IN THE ISUA SUPRACRUSTAL BELT, SOUTHERN WEST GREENLAND: IMPLICATIONS FOR THE COMPOSITION AND TEMPERATURE OF EARLY ARCHEAN UPPER MANTLE	K385	BASALT	65.15	-49.75	3800	0.999591	1298.13	1.29559	48.2	0.29	18.4	9.81	0.17	12.4	6.57	0.76	0.06	0.05
West Greenland	GEOCHEMISTRY OF THE OLDEST MORB AND OIB IN THE ISUA SUPRACRUSTAL BELT, SOUTHERN WEST GREENLAND: IMPLICATIONS FOR THE COMPOSITION AND TEMPERATURE OF EARLY ARCHEAN UPPER MANTLE	K026	BASALT	65.15	-49.75	3800	0.999273	1284.15	1.2805	49.5	0.34	18.9	9.17	0.21	8.28	9.87	1.47	0.26	0.06
West Greenland	GEOCHEMISTRY OF THE OLDEST MORB AND OIB IN THE ISUA SUPRACRUSTAL BELT, SOUTHERN WEST GREENLAND: IMPLICATIONS FOR THE COMPOSITION AND TEMPERATURE OF EARLY ARCHEAN UPPER MANTLE	Picore mantle	BASALT	65.15	-49.75	3800	0.998741	1283.12	1.08038	52.1	0.31	16.3	9.47	0.19	8.31	8.71	1.98	0.11	0.05
West Greenland	GEOCHEMISTRY OF THE OLDEST MORB AND OIB IN THE ISUA SUPRACRUSTAL BELT, SOUTHERN WEST GREENLAND: IMPLICATIONS FOR THE COMPOSITION AND TEMPERATURE OF EARLY ARCHEAN UPPER MANTLE	K626	BASALT	65.15	-49.75	3800	0.999256	1281.46	1.40366	48.6	0.24	17.2	9.2	0.16	12	7.81	2.29	0.07	0.05
West Greenland	GEOCHEMISTRY OF THE OLDEST MORB AND OIB IN THE ISUA SUPRACRUSTAL BELT, SOUTHERN WEST GREENLAND: IMPLICATIONS FOR THE COMPOSITION AND TEMPERATURE OF EARLY ARCHEAN UPPER MANTLE	K730	BASALT	65.15	-49.75	3800	0.999699	1276.48	1.1966	48.9	0.28	18	9.16	0.21	11.7	8.81	0.79	0.15	0.05
West Greenland	GEOCHEMISTRY OF THE OLDEST MORB AND OIB IN THE ISUA SUPRACRUSTAL BELT, SOUTHERN WEST GREENLAND: IMPLICATIONS FOR THE COMPOSITION AND TEMPERATURE OF EARLY ARCHEAN UPPER MANTLE	K020	BASALT	65.15	-49.75	3800	0.999508	1273.28	1.1727	50.3	0.31	18.7	8.87	0.24	7.26	10.6	1.27	0.57	0.05
West Greenland	GEOCHEMISTRY OF THE OLDEST MORB AND OIB IN THE ISUA SUPRACRUSTAL BELT, SOUTHERN WEST GREENLAND: IMPLICATIONS FOR THE COMPOSITION AND TEMPERATURE OF EARLY ARCHEAN UPPER MANTLE	K384	BASALT	65.15	-49.75	3800	0.999301	1272.63	1.13193	49.2	0.3	19.8	9.11	0.14	9.77	7.84	0.87	0.13	0.05
West Greenland	GEOCHEMISTRY OF THE OLDEST MORB AND OIB IN THE ISUA SUPRACRUSTAL BELT, SOUTHERN WEST GREENLAND: IMPLICATIONS FOR THE COMPOSITION AND TEMPERATURE OF EARLY ARCHEAN UPPER MANTLE	Pillow	BASALT	65.15	-49.75	3800	0.999178	1270.5	1.05188	52	0.31	17.1	9.05	0.18	7.62	9.52	2	0.14	0.06
West Greenland	GEOCHEMISTRY OF THE OLDEST MORB AND OIB IN THE ISUA SUPRACRUSTAL BELT, SOUTHERN WEST GREENLAND: IMPLICATIONS FOR THE COMPOSITION AND TEMPERATURE OF EARLY ARCHEAN UPPER MANTLE	K585	BASALT	65.15	-49.75	3800	0.999691	1267.93	1.15931	48.4	0.26	17.3	8.84	0.2	11.8	8.73	1.04	0.02	0.05
West Greenland	GEOCHEMISTRY OF THE OLDEST MORB AND OIB IN THE ISUA SUPRACRUSTAL BELT, SOUTHERN WEST GREENLAND: IMPLICATIONS FOR THE COMPOSITION AND TEMPERATURE OF EARLY ARCHEAN UPPER MANTLE	K694	BASALT	65.15	-49.75	3800	0.997696	1257.6	1.09878	49	0.24	16.9	8.65	0.19	12.3	9.17	1.02	0.12	0.05
West Greenland	GEOCHEMISTRY OF THE OLDEST MORB AND OIB IN THE ISUA SUPRACRUSTAL BELT, SOUTHERN WEST GREENLAND: IMPLICATIONS FOR THE COMPOSITION AND TEMPERATURE OF EARLY ARCHEAN UPPER MANTLE	K562 core	BASALT	65.15	-49.75	3800	0.999767	1235.15	0.878402	50.4	0.26	17.7	8.03	0.18	9.11	10.1	1.03	0.2	0.05
West Greenland	DACITIC OCELLI IN MAFIC LAVAS, 3.8-3.7 GA ISUA GREENSTONE BELT, WEST GREENLAND: GEOCHEMICAL EVIDENCE FOR PARTIAL MELTING OF OCEANIC CRUST AND MAGMA MIXING	465501	BASALT	65.1317	50.1647	3750	0.999935	1555.13	3.7785	46.8	0.7	9.9	15.48		12.6	11.7	1.2	0
West Greenland	DACITIC OCELLI IN MAFIC LAVAS, 3.8-3.7 GA ISUA GREENSTONE BELT, WEST GREENLAND: GEOCHEMICAL EVIDENCE FOR PARTIAL MELTING OF OCEANIC CRUST AND MAGMA MIXING	465614	BASALT	65.1314	50.1648	3750	0.999935	1497.52	2.65421	50.5	0.7	8.3	14.85		11.3	11.4	1.3
West Greenland	PETROGENESIS AND GEOCHEMISTRY OF METABASALTIC AND METASEDIMENTARY ENCLAVES IN THE AMITSOQ GNEISSES, WEST GREENLAND	119221	basalt	63.7883	-51.5783	3750	0.99993	1487.15	2.88594	48.04	0.65	8.15	13.9	0.25	12.34	12.63	0.9	0.8	0.08
West Greenland	PETROGENESIS AND GEOCHEMISTRY OF METABASALTIC AND METASEDIMENTARY ENCLAVES IN THE AMITSOQ GNEISSES, WEST GREENLAND	117906	basalt	63.85	-51.4717	3750	0.999967	1322.18	1.73411	50.9	0.54	13.5	10.4	0.21	10.5	6.63	2.2	3.12	0.17
SW Greenland	THE ORIGIN OF DECOUPLED HF-ND ISOTOPE COMPOSITIONS IN EOARCHEAN ROCKS FROM SOUTHERN WEST GREENLAND	JEH-2007-23	BASALT	65.1034	-50.1614	3715	0.921174	1285.72	1.04104	52	0.74	13.6	9.63	0.16	10.2	8.9	1.7	0.14	0.047
Pilbara Block, WESTERN AUSTRALIA	AGE OF THE ARCHEAN TALGA-TALGA SUBGROUP, PILBARA BLOCK, WESTERN AUSTRALIA, AND EARLY EVOLUTION OF THE MANTLE: NEW SM-ND ISOTOPIC EVIDENCE	3C	BASALT	-21.18	119.73	3707	0.987011	1371.21	1.45954	49.68	0.68	5.84	11.2	0.24	13.91	14.94	0.42	0.22	0.4
Pilbara Block, WESTERN AUSTRALIA	AGE OF THE ARCHEAN TALGA-TALGA SUBGROUP, PILBARA BLOCK, WESTERN AUSTRALIA, AND EARLY EVOLUTION OF THE MANTLE: NEW SM-ND ISOTOPIC EVIDENCE	92	BASALT	-21.18	119.73	3707	0.988065	1308.12	1.11476	50.91	0.7	7.49	9.75	0.22	12.19	14.79	1.45	0.08	0.04
Barberton	KOMATIITES OF THE ONVERWACHT GROUP, S. AFRICA: REE GEOCHEMISTRY, SM/ND AGE AND MANTLE EVOLUTION	5010	BASALT	-26	30.5	3560	0.980944	1347.38	1.4404	52.6	0.61	13.81	10.93	0.17	6.32	9.17	2.72	0.17	0.07
Barberton	KOMATIITES OF THE ONVERWACHT GROUP, S. AFRICA: REE GEOCHEMISTRY, SM/ND AGE AND MANTLE EVOLUTION	5095	BASALT	-25.77	31	3560	0.999766	1315.91	1.28163	50.92	0.69	14.38	9.96	0.17	7.31	11.29	1.67	0.2
Barberton	THE GEOLOGY OF THE SCHAPENBURG GREENSTONE REMNANT AND SURROUNDING ARCHEAN GRANITIC TERRANE SOUTH OF BADPLAAS, EASTERN TRANSVAAL	JV4	BASALT	-26.1	30.5	3549	0.999935	1331.85	1.05924	53.3	0.47	5.22	10.8	0.21	13.6	12.5	1.3	0.18	0.1
Barberton	THE JAMESTOWN OPHIOLITE COMPLEX, BARBERTON MOUNTAIN BELT: A SECTION THROUGH 3.5 GA OCEANIC CRUST	1	THOLEIITE	-26	30.5	3540	0.984988	1325.59	1.35622	53.43	1.01	14.61	10.62	0.2	7.03	8.55	2.72	0.52	0.12
Barberton	THE JAMESTOWN OPHIOLITE COMPLEX, BARBERTON MOUNTAIN BELT: A SECTION THROUGH 3.5 GA OCEANIC CRUST	16	THOLEIITE	-26	30.5	3540	0.999933	1283.22	0.982011	52.06	0.56	14.52	9.12	0.23	6.64	13.94	1.23	0	0.07
Barberton	THE GEOLOGY AND GEOCHEMISTRY OF THE LOWER ULTRAMAFIC UNIT OF THE ONVERWACHT GROUP AND A PROPOSED NEW CLASS OF IGNEOUS ROCKS	KJ1	THOLEIITE	-25.53	31.32	3505	0.999938	1539.7	3.40668	49.19	1.59	12.99	15.63	0.28	6.53	8.58	2.5	0.23
Barberton	THE GEOLOGY AND GEOCHEMISTRY OF THE LOWER ULTRAMAFIC UNIT OF THE ONVERWACHT GROUP AND A PROPOSED NEW CLASS OF IGNEOUS ROCKS	K206	THOLEIITE	-25.48	31.52	3505	0.999938	1403.83	1.84898	52.68	1.07	10.5	12.38	0.21	6.58	8.46	3.5	0.2	0.13
Barberton	THE GEOLOGY AND GEOCHEMISTRY OF THE LOWER ULTRAMAFIC UNIT OF THE ONVERWACHT GROUP AND A PROPOSED NEW CLASS OF IGNEOUS ROCKS	V11	THOLEIITE	-25.77	31	3505	0.992158	1368.61	1.6672	52.98	1.08	13.2	11.52	0.18	6.25	8.3	3.35	0.48	0.09
Barberton	THE GEOLOGY AND GEOCHEMISTRY OF THE LOWER ULTRAMAFIC UNIT OF THE ONVERWACHT GROUP AND A PROPOSED NEW CLASS OF IGNEOUS ROCKS	TS1	THOLEIITE	-26	30.5	3505	0.99993	1274.6	1.0351	53.76	0.74	11.82	9.3	0.17	8.98	9.28	3.24	0.15	0.12
Barberton	GEOLOGICAL, TEXTURAL AND GEOCHEMICAL FEATURES OF KOMATIITIC FLOWS FROM THE KOMATI FORMATION	VS-1/80A	BASALT	-25.77	31	3486	0.985221	1334.07	1.22908	53.7	0.63	9.24	11.22	0.17	14.42	8.18	1.9	0.09	0.04
Barberton	ASPECTS OF VOLCANISM AND METAMORPHISM OF THE ONVERWACHT GROUP LAVAS IN THE SOUTHWESTERN PORTION OF THE BARBERTON GREENSTONE BELT	MC12003	NOT-GIVEN	-25.77	31	3472	0.999569	1402.72	1.53831	53.57	0.54	7.69	12.87	0.01	11.71	11.78	1.03	0.04	0.07
Barberton	ASPECTS OF VOLCANISM AND METAMORPHISM OF THE ONVERWACHT GROUP LAVAS IN THE SOUTHWESTERN PORTION OF THE BARBERTON GREENSTONE BELT	MC06003	NOT-GIVEN	-25.77	31	3472	0.99906	1369.16	1.40766	52.64	0.81	9.41	11.8	0.01	10.28	11.86	1.23	0.13	0.15
Barberton	THE PETROGENESIS OF SOME ARCHEAN VOLCANIC ROCKS FROM SOUTHERN AFRICA	4	BASALT	-25.77	31	3470	0.995842	1256.28	1.26077	49.68	0.47	14.25	8.21	0.14	8.72	11.19	2.6	1.07	0.1
eastern Pilbara	CONSTRAINTS ON THE AGE OF THE WARRAWOONA GROUP, EASTERN PILBARA BLOCK, WESTERN AUSTRALIA	UWA-98078	BASALT	-21.0192	119.801	3463	0.999869	1263.53	0.954487	49.49	0.57	14.69	8.58	0.18	8.17	9.59	1.48	0.01	0.05
Pilbara	THE OLDEST CONTINENTAL AND OCEANIC PLATEAUS: GEOCHEMISTRY OF BASALTS AND KOMATIITES OF THE PILBARA CRATON, AUSTRALIA	EM52	BASALT	-21.18	119.73	3461	0.998198	1402.14	1.98011	51.63	0.58	13.71	12.64	0.16	9.24	9.47	2.27	0.3
Pilbara	THE OLDEST CONTINENTAL AND OCEANIC PLATEAUS: GEOCHEMISTRY OF BASALTS AND KOMATIITES OF THE PILBARA CRATON, AUSTRALIA	EM79	basalt	-21.18	119.73	3461	0.99899	1345.94	1.41841	53.92	0.47	11.34	11.44	0.21	10.84	9.01	2.78	0
Pilbara	THE OLDEST CONTINENTAL AND OCEANIC PLATEAUS: GEOCHEMISTRY OF BASALTS AND KOMATIITES OF THE PILBARA CRATON, AUSTRALIA	EM81	basalt	-21.18	119.73	3461	0.952497	1342.78	1.52496	52.89	0.37	10.98	11.37	0.21	13.5	7.47	2.51	0.7
Pilbara	THE OLDEST CONTINENTAL AND OCEANIC PLATEAUS: GEOCHEMISTRY OF BASALTS AND KOMATIITES OF THE PILBARA CRATON, AUSTRALIA	EM82	basalt	-21.18	119.73	3461	0.999537	1338.69	1.43197	52.99	0.37	11.75	11.29	0.26	13.53	7.12	2.51	0.18
Pilbara	THE OLDEST CONTINENTAL AND OCEANIC PLATEAUS: GEOCHEMISTRY OF BASALTS AND KOMATIITES OF THE PILBARA CRATON, AUSTRALIA	EM78	basalt	-21.18	119.73	3461	0.998185	1319.79	1.31548	53.84	0.48	11.17	10.6	0.19	9.82	10.77	3.09	0.03
Barberton	FLOW BANDING IN BASALTIC PILLOW LAVAS FROM THE EARLY ARCHEAN HOOGGENOEG FORMATION, BARBERTON GREENSTONE BELT, SOUTH AFRICA	196-BG-04	BASALT	-26.13	30.98	3458.5	0.908207	1651.81	5.23849	45.23	1.04	12.18	18.01	0.31	9.96	8.1	0.68	0.81	0.06
Barberton	FLOW BANDING IN BASALTIC PILLOW LAVAS FROM THE EARLY ARCHEAN HOOGGENOEG FORMATION, BARBERTON GREENSTONE BELT, SOUTH AFRICA	132-BG-05	basaltic pillow lavas	-26.13	30.98	3458.5	0.99359	1592.73	4.26587	45.73	1	13.71	16.6	0.26	8.08	7.52	0.5	1.68	0.05
Barberton	FLOW BANDING IN BASALTIC PILLOW LAVAS FROM THE EARLY ARCHEAN HOOGGENOEG FORMATION, BARBERTON GREENSTONE BELT, SOUTH AFRICA	37 BGO-05	BASALT	-26.13	30.98	3458.5	0.992856	1588.92	4.30329	45.85	1.1	15.19	16.6	0.28	7.84	6.21	0.96	1.87	0.06
Barberton	FLOW BANDING IN BASALTIC PILLOW LAVAS FROM THE EARLY ARCHEAN HOOGGENOEG FORMATION, BARBERTON GREENSTONE BELT, SOUTH AFRICA	211-BG-04	basaltic pillow lavas	-26.13	30.98	3458.5	0.99297	1548.3	3.89179	45.45	1.01	16.31	15.43	0.26	7.76	7.58	0.38	2.39	0.07
Barberton	FLOW BANDING IN BASALTIC PILLOW LAVAS FROM THE EARLY ARCHEAN HOOGGENOEG FORMATION, BARBERTON GREENSTONE BELT, SOUTH AFRICA	204-BG-04	basaltic pillow lavas	-26.13	30.98	3458.5	0.998354	1529.71	3.57661	46.25	1.04	14.91	14.73	0.24	6.67	11.82	0.67	1.25	0.08
Barberton	FLOW BANDING IN BASALTIC PILLOW LAVAS FROM THE EARLY ARCHEAN HOOGGENOEG FORMATION, BARBERTON GREENSTONE BELT, SOUTH AFRICA	07 BGO-05	BASALT	-26.13	30.98	3458.5	0.993008	1517.28	3.59073	46.16	0.94	14.3	14.59	0.25	7.84	8.63	0.56	3.11	0.06
Barberton	FLOW BANDING IN BASALTIC PILLOW LAVAS FROM THE EARLY ARCHEAN HOOGGENOEG FORMATION, BARBERTON GREENSTONE BELT, SOUTH AFRICA	200-BG-04	basaltic pillow lavas	-26.13	30.98	3458.5	0.996249	1509.44	2.89338	49.43	1.03	13.9	14.9	0.24	6.29	9.43	0.67	1.12	0.07
Barberton	FLOW BANDING IN BASALTIC PILLOW LAVAS FROM THE EARLY ARCHEAN HOOGGENOEG FORMATION, BARBERTON GREENSTONE BELT, SOUTH AFRICA	05 BGO-06	BASALT	-26.13	30.98	3458.5	0.984441	1506.3	2.93022	48.84	1.08	13.51	14.84	0.24	6.87	7.49	1.14	1.45	0.1
Barberton	FLOW BANDING IN BASALTIC PILLOW LAVAS FROM THE EARLY ARCHEAN HOOGGENOEG FORMATION, BARBERTON GREENSTONE BELT, SOUTH AFRICA	28 BGO-05	BASALT	-26.13	30.98	3458.5	0.995696	1472.8	2.75753	48.99	0.99	14.02	13.86	0.24	6.58	7.62	1.46	2.19	0.06
Barberton	FLOW BANDING IN BASALTIC PILLOW LAVAS FROM THE EARLY ARCHEAN HOOGGENOEG FORMATION, BARBERTON GREENSTONE BELT, SOUTH AFRICA	133-BG-05	basaltic pillow lavas	-26.13	30.98	3458.5	0.992176	1463.55	2.47408	49.99	1.03	13.6	13.94	0.22	7.11	7.34	0.57	2.4	0.06
Barberton	SILICA ALTERATION ZONES IN THE BARBERTON GREENSTONE BELT: A WINDOW INTO SUBSEAFLOOR PROCESSES 3.5 - 3.3 GA AGO	AH10	BASALT	-25.8	30.8	3458.5	0.998982	1463.32	2.83751	46.28	1.2	15.61	13.64	0.2	8.78	3.27	0.08	4.37	0.11
Barberton	FLOW BANDING IN BASALTIC PILLOW LAVAS FROM THE EARLY ARCHEAN HOOGGENOEG FORMATION, BARBERTON GREENSTONE BELT, SOUTH AFRICA	129-BG-05	basaltic pillow lavas	-26.13	30.98	3458.5	0.998514	1462.97	2.43109	49.83	0.95	14.08	13.76	0.21	6.46	8.89	0.74	1.48	0.06
Barberton	FLOW BANDING IN BASALTIC PILLOW LAVAS FROM THE EARLY ARCHEAN HOOGGENOEG FORMATION, BARBERTON GREENSTONE BELT, SOUTH AFRICA	128-BG-05	basaltic pillow lavas	-26.13	30.98	3458.5	0.980939	1452.92	2.39689	50.08	1	13.87	13.47	0.21	6.49	7.59	2.46	0.6	0.05
Barberton	FLOW BANDING IN BASALTIC PILLOW LAVAS FROM THE EARLY ARCHEAN HOOGGENOEG FORMATION, BARBERTON GREENSTONE BELT, SOUTH AFRICA	120-BG-05	basaltic pillow lavas	-26.13	30.98	3458.5	0.99779	1448.12	2.21746	50.56	0.94	13.4	13.45	0.22	6.51	9.37	1.16	0.85	0.05
Barberton	FLOW BANDING IN BASALTIC PILLOW LAVAS FROM THE EARLY ARCHEAN HOOGGENOEG FORMATION, BARBERTON GREENSTONE BELT, SOUTH AFRICA	198-BG-04	basaltic pillow lavas	-26.13	30.98	3458.5	0.998271	1446.68	2.20537	50.82	1	14.58	13.52	0.22	6.33	8.45	0.53	1.62	0.08
Barberton	FLOW BANDING IN BASALTIC PILLOW LAVAS FROM THE EARLY ARCHEAN HOOGGENOEG FORMATION, BARBERTON GREENSTONE BELT, SOUTH AFRICA	212-BG-04	basaltic pillow lavas	-26.13	30.98	3458.5	0.983537	1444.89	2.12687	51.39	1.04	14.34	13.66	0.22	6.52	6.93	0.41	2.07	0.06
Barberton	FLOW BANDING IN BASALTIC PILLOW LAVAS FROM THE EARLY ARCHEAN HOOGGENOEG FORMATION, BARBERTON GREENSTONE BELT, SOUTH AFRICA	193-BG-04	basaltic pillow lavas	-26.13	30.98	3458.5	0.996903	1442.07	2.04898	51.86	0.92	13.33	13.41	0.21	6.13	9.65	1.33	0.41	0.07
Pilbara, WESTERN AUSTRALIA	ARCHAEAN CALC-ALKALINE VOLCANISM IN THE PILBARA BLOCK, WESTERN AUSTRALIA	86464	THOLEIITE	-21.75	120	3453	0.99393	1335.65	1.55751	49.6	0.57	13.25	10.38	0.19	8.25	8.45	3.12	0.01	0.04
Pilbara, WESTERN AUSTRALIA	ARCHAEAN CALC-ALKALINE VOLCANISM IN THE PILBARA BLOCK, WESTERN AUSTRALIA	86469	THOLEIITE	-21.75	120	3453	0.991478	1328.68	1.46426	50.43	0.57	13.53	10.41	0.21	8.95	8.93	2.66	0.05	0.06
Barberton	ARCHAEAN FLOW-TOP ALTERATION ZONES FORMED INITIALLY IN A LOW-TEMPERATURE SULPHATE-RICH ENVIRONMENT	4	BASALT	-25.9	31.22	3450	0.999531	1319.14	1.17335	52.35	0.59	10.64	10.57	0.2	12.79	11.48	1.14	0.05	0.05
Kaapvaal Craton	NEW PGE AND RE/OS-ISOTOPE DATA FROM LOWER CRUSTAL SECTIONS OF THE VREDEFORT DOME AND A REINTERPRETATION OF ITS ^CRUST ON EDGE^ PROFILE	VT97/12	BASALT	-27	27.2	3430	0.99993	1250.99	1.10347	52.4	0.54	15.2	8.2	0.17	6.88	11.74	3.34	0.29	0.08
Kaapvaal Craton	GEOCHEMISTRY OF THE MAFIC/ULTRAMAFIC VOLCANIC ASSOCIATIONS OF THE NONDWENI GREENSTONE BELT, SOUTH AFRICA, AND CONSTRAINTS ON THEIR PETROGENESIS	RIG174	BASALT	-28	30.75	3406	0.975637	1332.2	1.61363	50.3	0.59	13.91	10.03	0.29	6.73	15.03	1.75	0.98	0.06
Pilbara	IT STARTED WITH A PLUME - EARLY ARCHEAN BASALTIC PROTO-CONTINENTAL CRUST	176766	BASALT	-20.926	120.16	3380	0.901009	1431.55	2.34431	48.315	0.937	9.417	12.6	0.221	10.961	12.164	1.842	0.181	0.085
Pilbara	IT STARTED WITH A PLUME - EARLY ARCHEAN BASALTIC PROTO-CONTINENTAL CRUST	176788	BASALT	-20.9736	119.85	3380	0.935667	1391.57	1.74761	49.928	1.058	11.953	11.73	0.186	6.48	7.227	2.823	0.096	0.107
Pilbara	IT STARTED WITH A PLUME - EARLY ARCHEAN BASALTIC PROTO-CONTINENTAL CRUST	176756	ANDESITE	-20.9142	120.177	3380	0.920976	1371.46	1.64961	49.474	0.872	14.142	11.12	0.186	6.631	12.598	1.153	0.033	0.07
Pilbara	IT STARTED WITH A PLUME - EARLY ARCHEAN BASALTIC PROTO-CONTINENTAL CRUST	96048540B	BASALT	-21	119	3380	0.933532	1331.06	1.25747	51.94	0.95	8.08	10.69	0.17	11.7	9.78	2.26	0.03	0.1
Pilbara	IT STARTED WITH A PLUME - EARLY ARCHEAN BASALTIC PROTO-CONTINENTAL CRUST	180204	BASALT	-21.466	120.148	3380	0.958655	1325.08	1.51558	50.214	0.581	13.274	10.14	0.211	8.54	11.265	2.714	0.045	0.041
Pilbara	IT STARTED WITH A PLUME - EARLY ARCHEAN BASALTIC PROTO-CONTINENTAL CRUST	180216	BASALT	-21.6326	120.562	3380	0.902116	1306.05	1.11564	50.166	0.807	14.281	9.83	0.175	8.028	5.962	2.058	0.079	0.065
Pilbara	IT STARTED WITH A PLUME - EARLY ARCHEAN BASALTIC PROTO-CONTINENTAL CRUST	176745	BASALT	-20.5291	120.195	3380	0.993138	1297.93	1.16522	50.466	0.453	13.913	9.34	0.169	6.844	11.204	1.527	0.541	0.051
Pilbara	IT STARTED WITH A PLUME - EARLY ARCHEAN BASALTIC PROTO-CONTINENTAL CRUST	180203	BASALT	-21.4671	120.148	3380	0.974439	1297.11	1.34309	48.915	0.544	15.418	9.32	0.186	9.027	12.533	1.548	0.071	0.038
Pilbara	IT STARTED WITH A PLUME - EARLY ARCHEAN BASALTIC PROTO-CONTINENTAL CRUST	179900	BASALT	-21.4673	120.145	3380	0.965913	1283.16	1.3719	47.632	0.527	15.14	8.6	0.161	7.71	12.237	2.432	0.027	0.039
Pilbara	IT STARTED WITH A PLUME - EARLY ARCHEAN BASALTIC PROTO-CONTINENTAL CRUST	176744	ANDESITE	-20.5296	120.193	3380	0.971689	1282.83	1.06586	52.25	0.508	14.195	9.21	0.174	6.995	10.403	1.504	1.046	0.059
Pilbara	IT STARTED WITH A PLUME - EARLY ARCHEAN BASALTIC PROTO-CONTINENTAL CRUST	176743	ANDESITE	-20.532	120.189	3380	0.959933	1270.6	0.944754	52.241	0.516	14.072	8.89	0.177	6.899	10.013	1.752	0.539	0.06
Pilbara	IT STARTED WITH A PLUME - EARLY ARCHEAN BASALTIC PROTO-CONTINENTAL CRUST	179878	ANDESITE	-21.4699	120.067	3380	0.931105	1240.79	1.09861	52.751	0.708	15.289	8.23	0.176	8.355	6.319	4.828	0.092	0.056
Pilbara	IT STARTED WITH A PLUME - EARLY ARCHEAN BASALTIC PROTO-CONTINENTAL CRUST	179817	BASALT	-21.3562	119.797	3377.5	0.926788	1376.4	1.95191	49.483	0.499	10.988	11.33	0.225	11.022	13.401	2.228	0.145	0.038
Pilbara	IT STARTED WITH A PLUME - EARLY ARCHEAN BASALTIC PROTO-CONTINENTAL CRUST	176742	ANDESITE	-20.5315	120.187	3377.5	0.938693	1298.19	1.13151	52.323	0.525	14.196	9.6	0.18	6.694	10.082	1.421	1.106	0.065
Pilbara	FIELD OCCURRENCE, GEOCHEMISTRY AND PETROGENESIS OF THE ARCHEAN MID-OCEANIC RIDGE BASALTS (AMORBS) OF THE CLEAVERVILLE AREA, PILBARA CRATON, WESTERN AUSTRALIA	CLG-37	BASALT	-20.8	117.8	3250	0.998908	1519.88	2.90193	49.29	1.42	13.06	15.36	0.26	7.88	10.2	0.55	0.01	0.12
Pilbara	FIELD OCCURRENCE, GEOCHEMISTRY AND PETROGENESIS OF THE ARCHEAN MID-OCEANIC RIDGE BASALTS (AMORBS) OF THE CLEAVERVILLE AREA, PILBARA CRATON, WESTERN AUSTRALIA	CLG-33	BASALT	-20.8	117.8	3250	0.985657	1420.01	2.41498	49.08	1.11	15.11	12.66	0.23	8.57	8.84	3.19	0.02	0.1
Pilbara	FIELD OCCURRENCE, GEOCHEMISTRY AND PETROGENESIS OF THE ARCHEAN MID-OCEANIC RIDGE BASALTS (AMORBS) OF THE CLEAVERVILLE AREA, PILBARA CRATON, WESTERN AUSTRALIA	CLG-18	BASALT	-20.8	117.8	3250	0.991461	1413.19	2.19296	49.58	1.28	15.32	12.81	0.19	10.26	6.47	2.67	0.01	0.11
Pilbara	FIELD OCCURRENCE, GEOCHEMISTRY AND PETROGENESIS OF THE ARCHEAN MID-OCEANIC RIDGE BASALTS (AMORBS) OF THE CLEAVERVILLE AREA, PILBARA CRATON, WESTERN AUSTRALIA	CLG-3	BASALT	-20.8	117.8	3250	0.994114	1406.98	2.16819	50.42	1.46	15.87	12.37	0.2	6.68	8.59	3.24	0.01	0.13
Pilbara	FIELD OCCURRENCE, GEOCHEMISTRY AND PETROGENESIS OF THE ARCHEAN MID-OCEANIC RIDGE BASALTS (AMORBS) OF THE CLEAVERVILLE AREA, PILBARA CRATON, WESTERN AUSTRALIA	CLG-49	BASALT	-20.8	117.8	3250	0.954156	1405.54	1.92494	50.78	1.25	14.83	12.53	0.22	7.66	9.48	1.75		0.11
Pilbara	FIELD OCCURRENCE, GEOCHEMISTRY AND PETROGENESIS OF THE ARCHEAN MID-OCEANIC RIDGE BASALTS (AMORBS) OF THE CLEAVERVILLE AREA, PILBARA CRATON, WESTERN AUSTRALIA	CLG-5	BASALT	-20.8	117.8	3250	0.997335	1402.81	2.06911	50.45	1.47	15.97	12.46	0.18	7.77	7.48	2.89	0.01	0.13
Pilbara	FIELD OCCURRENCE, GEOCHEMISTRY AND PETROGENESIS OF THE ARCHEAN MID-OCEANIC RIDGE BASALTS (AMORBS) OF THE CLEAVERVILLE AREA, PILBARA CRATON, WESTERN AUSTRALIA	CLG-19	BASALT	-20.8	117.8	3250	0.999797	1385.28	1.81245	51.12	1.28	14.93	12.33	0.23	10.11	6.65	2.28	0.07	0.11
Pilbara	FIELD OCCURRENCE, GEOCHEMISTRY AND PETROGENESIS OF THE ARCHEAN MID-OCEANIC RIDGE BASALTS (AMORBS) OF THE CLEAVERVILLE AREA, PILBARA CRATON, WESTERN AUSTRALIA	CLG-13	BASALT	-20.8	117.8	3250	0.997166	1383.91	2.17663	48.49	1.3	15.88	11.29	0.2	7.01	11.51	2.98	0.01	0.12
Pilbara	FIELD OCCURRENCE, GEOCHEMISTRY AND PETROGENESIS OF THE ARCHEAN MID-OCEANIC RIDGE BASALTS (AMORBS) OF THE CLEAVERVILLE AREA, PILBARA CRATON, WESTERN AUSTRALIA	CLG-48	BASALT	-20.8	117.8	3250	0.999912	1381.63	2.10688	48.07	0.9	15.91	11.48	0.2	9.27	10.81	2.16	0.02	0.09
Pilbara	FIELD OCCURRENCE, GEOCHEMISTRY AND PETROGENESIS OF THE ARCHEAN MID-OCEANIC RIDGE BASALTS (AMORBS) OF THE CLEAVERVILLE AREA, PILBARA CRATON, WESTERN AUSTRALIA	CLG-6	BASALT	-20.8	117.8	3250	0.995407	1379.09	1.86314	50.87	1.3	15.03	11.57	0.22	6.52	10.32	2.72	0.01	0.12
Singhbhum	GEOCHEMISTRY OF ARCHEAN VOLCANIC ROCKS FROM IRON ORE SUPERGROUP, SINGHBHUM, EASTERN INDIA	52	BASALT	21	86	3245	0.999303	1575.21	3.83645	47.64	1.73	8.37	16.14	0.25	8.7	10.24	1.58	0.47	0.09
Singhbhum	GEOCHEMISTRY OF ARCHEAN VOLCANIC ROCKS FROM IRON ORE SUPERGROUP, SINGHBHUM, EASTERN INDIA	51	BASALT	21	86	3245	0.999837	1466.72	2.5557	48.95	1.22	15.36	13.87	0.15	7.32	9.88	1.32	0.12	0.03
Singhbhum	GEOCHEMISTRY OF ARCHEAN VOLCANIC ROCKS FROM IRON ORE SUPERGROUP, SINGHBHUM, EASTERN INDIA	55	BASALT	21	86	3245	0.999935	1453.86	2.36678	49.78	1.09	14.14	13.49	0.15	6.58	9.23	1.22	0.93	0.03
Singhbhum	GEOCHEMISTRY OF ARCHEAN VOLCANIC ROCKS FROM IRON ORE SUPERGROUP, SINGHBHUM, EASTERN INDIA	48	BASALT	21	86	3245	0.952687	1443.47	2.16426	51.33	0.63	13.09	13.61	0.16	8.14	11.33	1.11	0.24	0.03
Singhbhum	GEOCHEMISTRY OF ARCHEAN VOLCANIC ROCKS FROM IRON ORE SUPERGROUP, SINGHBHUM, EASTERN INDIA	40	BASALT	21	86	3245	0.994998	1443.35	2.2946	49.89	1.09	14.71	13.2	0.19	6.54	10.14	1.64	0.24	0.09
Singhbhum	GEOCHEMISTRY OF ARCHEAN VOLCANIC ROCKS FROM IRON ORE SUPERGROUP, SINGHBHUM, EASTERN INDIA	21	BASALT	21	85	3245	0.999742	1440.92	2.42061	48.69	1.47	14.85	13.05	0.2	6.94	8.37	2.05	0.63	0.12
Singhbhum	GEOCHEMISTRY OF ARCHEAN VOLCANIC ROCKS FROM IRON ORE SUPERGROUP, SINGHBHUM, EASTERN INDIA	54	BASALT	21	86	3245	0.999767	1436.57	2.21725	50.33	1.36	14.71	13.07	0.21	6.28	10.08	1.71	0.24	0.03
Singhbhum	GEOCHEMISTRY OF ARCHEAN VOLCANIC ROCKS FROM IRON ORE SUPERGROUP, SINGHBHUM, EASTERN INDIA	41	BASALT	21	86	3245	0.999877	1388	1.65511	52.43	1.45	14.62	12.23	0.19	6.66	8.53	1.75	0.24	0.16
Singhbhum	GEOCHEMISTRY OF ARCHEAN VOLCANIC ROCKS FROM IRON ORE SUPERGROUP, SINGHBHUM, EASTERN INDIA	39	BASALT	21	86	3245	0.999623	1325.65	1.1479	51.74	0.42	8.78	10.59	0.11	12.02	10.04	1.59	0.04	0.02
Singhbhum	GEOCHEMISTRY OF ARCHEAN VOLCANIC ROCKS FROM IRON ORE SUPERGROUP, SINGHBHUM, EASTERN INDIA	20	BASALT	21	85	3245	0.999935	1292.55	1.00493	53.96	0.62	11.61	9.84	0.16	8.61	9.72	1.72	0.9	0.02
Aldan Shield	PETROLOGY AND GEOCHEMISTRY OF METAMORPHOSED KOMATIITES AND BASALTS FROM THE TUNGURCHA GREENSTONE BELT, ALDAN SHIELD	86104	BASALT	57.03	120.72	3232	0.971229	1469.72	3.14384	46.6	0.95	12.2	13.3	0.29	12.7	11.4	1.2	1.25	0.1
Aldan Shield	PETROLOGY AND GEOCHEMISTRY OF METAMORPHOSED KOMATIITES AND BASALTS FROM THE TUNGURCHA GREENSTONE BELT, ALDAN SHIELD	8676	BASALT	57.03	120.72	3232	0.988023	1413.75	1.90667	52.7	0.94	13.7	12.9	0.19	6.85	10.4	1.46	0.68	0.18
Barberton	THE GEOLOGY AND GEOCHEMISTRY OF THE NELSHOOGTE SCHIST BELT AND ADJACENT STOLZBURG LAYERED ULTRAMAFIC COMPLEX, BARBERTON GREENSTONE BELT, SOUTH AFRICA	SB10	BASALT	-25.78	31.05	3224.5	0.999935	1516.4	2.7656	48.9	0.6	5.1	14.75	0.2	13.8	12.2	0.29	0.16	0.05
Barberton	THE GEOLOGY AND GEOCHEMISTRY OF THE NELSHOOGTE SCHIST BELT AND ADJACENT STOLZBURG LAYERED ULTRAMAFIC COMPLEX, BARBERTON GREENSTONE BELT, SOUTH AFRICA	S32	BASALT	-25.78	31.05	3224.5	0.999935	1438.25	1.79576	51.51	0.6	3.99	13.24	0.25	14.75	12.58	0.35	0.13	0.09
Barberton	THE GEOLOGY AND GEOCHEMISTRY OF THE NELSHOOGTE SCHIST BELT AND ADJACENT STOLZBURG LAYERED ULTRAMAFIC COMPLEX, BARBERTON GREENSTONE BELT, SOUTH AFRICA	S16	BASALT	-25.78	31.05	3224.5	0.999935	1368.78	1.46443	50.44	0.37	7.01	11.33	0.2	13.42	13.67	0.69	0.24	0.09
Barberton	THE GEOLOGY AND GEOCHEMISTRY OF THE NELSHOOGTE SCHIST BELT AND ADJACENT STOLZBURG LAYERED ULTRAMAFIC COMPLEX, BARBERTON GREENSTONE BELT, SOUTH AFRICA	S7	BASALT	-25.78	31.05	3224.5	0.99993	1360.94	1.40579	51.2	0.52	5.37	11.27	0.19	15.28	12.1	1.19	0.2	0.06
Barberton	THE GEOLOGY AND GEOCHEMISTRY OF THE NELSHOOGTE SCHIST BELT AND ADJACENT STOLZBURG LAYERED ULTRAMAFIC COMPLEX, BARBERTON GREENSTONE BELT, SOUTH AFRICA	SB37	BASALT	-25.78	31.05	3224.5	0.998218	1340.8	1.36967	51.1	0.6	11.9	10.91	0.1	10.4	9.1	1.8	0.07	0.07
Barberton	THE GEOLOGY AND GEOCHEMISTRY OF THE NELSHOOGTE SCHIST BELT AND ADJACENT STOLZBURG LAYERED ULTRAMAFIC COMPLEX, BARBERTON GREENSTONE BELT, SOUTH AFRICA	DH52	BASALT	-25.78	31.05	3224.5	0.999935	1320.86	0.955348	51.56	0.45	3.97	10.23	0.22	16.78	13.49	0.46	0.2	0.09
Barberton	THE GEOLOGY AND GEOCHEMISTRY OF THE NELSHOOGTE SCHIST BELT AND ADJACENT STOLZBURG LAYERED ULTRAMAFIC COMPLEX, BARBERTON GREENSTONE BELT, SOUTH AFRICA	S11	BASALT	-25.78	31.05	3224.5	0.999935	1317.69	0.878697	50.9	0.5	4.65	10.03	0.24	15.62	15.54	0.04	0.1	0.06
Barberton	THE GEOLOGY AND GEOCHEMISTRY OF THE NELSHOOGTE SCHIST BELT AND ADJACENT STOLZBURG LAYERED ULTRAMAFIC COMPLEX, BARBERTON GREENSTONE BELT, SOUTH AFRICA	DH46	BASALT	-25.78	31.05	3224.5	0.999923	1289.95	0.800832	51.81	0.42	4.04	9.43	0.25	16.68	13.97	0.86	0.13	0.09
Barberton	THE GEOLOGY AND GEOCHEMISTRY OF THE NELSHOOGTE SCHIST BELT AND ADJACENT STOLZBURG LAYERED ULTRAMAFIC COMPLEX, BARBERTON GREENSTONE BELT, SOUTH AFRICA	SB36	BASALT	-25.78	31.05	3224.5	0.99993	1279.32	0.962836	51.5	0.4	9.6	9.34	0.1	13.1	10.9	1.3	0.35	0.05
Barberton	THE GEOLOGY AND GEOCHEMISTRY OF THE NELSHOOGTE SCHIST BELT AND ADJACENT STOLZBURG LAYERED ULTRAMAFIC COMPLEX, BARBERTON GREENSTONE BELT, SOUTH AFRICA	S43	BASALT	-25.78	31.05	3224.5	0.99993	1229.62	1.06251	51.99	0.47	12.67	7.9	0.16	10.33	8.18	2.25	2.48	0.3
southern Kaapvaal Craton	EMPLACEMENT, CRYSTALLIZATION, AND ALTERATION OF SPINIFEX-TEXTURED KOMATIITIC BASALT FLOWS IN THE ARCHEAN NONDWENI GREENSTONE BELT, SOUTHERN KAAPVAAL CRATON, SOUTH AFRICA	SP85/21	BASALT	-28	30.75	3203.5	0.999397	1385.8	1.75588	50.69	0.7	8.09	12	0.22	16.39	10.97	0.96	0.22	0.06
Slave	THE NATURE AND SIGNIFICANCE OF PRE-YELLOWKNIFE SUPERGROUP ROCKS IN THE POINT LAKE AREA, SLAVE STRUCTURAL PROVINCE, CANADA	2	THOLEIITE	65.17	-113	3155	0.999937	1389.93	1.60399	51.5	0.62	12.94	12.39	0.22	9.81	10.35	0.3	0.42	0.03
Johannesburg Dome	THE GEOLOGY AND GEOCHEMISTRY OF THE MULDERSDRIF ULTRAMAFIC COMPLEX AND SURROUNDING AREA, KRUGERSDORP DISTRICT	VW29B	tholeiitic basalt (intrusion)	-26	27.78	3121	0.999546	1424.94	2.37264	48.6	2.07	14.22	12.41	0.2	6.41	9.77	2.21	0.79	0.23
Johannesburg Dome	THE GEOLOGY AND GEOCHEMISTRY OF THE MULDERSDRIF ULTRAMAFIC COMPLEX AND SURROUNDING AREA, KRUGERSDORP DISTRICT	VW39	THOLEIITE	-26	27.78	3121	0.999935	1331.45	1.52045	48.95	0.58	12.14	10.33	0.2	11.19	10.47	1.78	0.19	0.09
Johannesburg Dome	THE GEOLOGY AND GEOCHEMISTRY OF THE MULDERSDRIF ULTRAMAFIC COMPLEX AND SURROUNDING AREA, KRUGERSDORP DISTRICT	VW25	THOLEIITE	-26	27.78	3121	0.999726	1212.28	0.675521	51.2	0.34	14.8	7.29	0.13	9.1	13.1	1.1	0.16	0.04
southern West Greenland	ACCRETION AND EVOLUTION OF AN ARCHEAN HIGH-GRADE GREY GNEISS-AMPHIBOLITE COMPLEX: THE FISKEFJORD AREA, SOUTHERN WEST GREENLAND	328147	basalt	64.8296	-51.6657	3100	0.99979	1474.21	2.68901	49.62	1.37	14.05	14.1	0.22	7.32	8.69	2.14	0.48	0.22
southern West Greenland	ACCRETION AND EVOLUTION OF AN ARCHEAN HIGH-GRADE GREY GNEISS-AMPHIBOLITE COMPLEX: THE FISKEFJORD AREA, SOUTHERN WEST GREENLAND	328269	basalt	64.8616	-51.7701	3100	0.996006	1464.24	2.77643	47.47	0.67	6.42	12.89	0.26	13.83	14.9	1.41	0.43	0.09
Baltic	EVOLUTION OF YUZHNO-VYGOZERO GREENSTONE BELT, KARELIA	192	BASALT	64.65	30.75	3100	0.99964	1440.35	2.39731	50.21	0.74	15.21	13.42	0.18	8.23	10.86	1.56	0.46	0.07
Baltic	EVOLUTION OF YUZHNO-VYGOZERO GREENSTONE BELT, KARELIA	41	BASALT	64.65	30.75	3100	0.995261	1425.3	2.72528	46.38	0.77	16.26	12.25	0.19	9.76	11.26	2.41	0.08	0.06
Baltic	EVOLUTION OF YUZHNO-VYGOZERO GREENSTONE BELT, KARELIA	45819	BASALT	64.65	30.75	3100	0.999662	1419.95	2.69073	46.97	1.02	15.8	11.84	0.2	7.82	14.89	1.82	0.85	0.06
Baltic	EVOLUTION OF YUZHNO-VYGOZERO GREENSTONE BELT, KARELIA	340	BASALT	64.65	30.75	3100	0.970575	1412.91	2.27609	51.13	1.42	15.15	12.72	0.21	7.26	6.91	3.91	0.51	0.09
Baltic	EVOLUTION OF YUZHNO-VYGOZERO GREENSTONE BELT, KARELIA	326	BASALT	64.65	30.75	3100	0.999547	1411.3	2.19674	49.22	1.07	15.31	12.46	0.2	8.35	10.29	1.94	0.16	0.06
Baltic	EVOLUTION OF YUZHNO-VYGOZERO GREENSTONE BELT, KARELIA	240	BASALT	64.65	30.75	3100	0.999673	1404.49	2.46034	45.31	1.17	17.31	11.51	0.17	9.16	13.09	1.2	0.03	0.08
Baltic	EVOLUTION OF YUZHNO-VYGOZERO GREENSTONE BELT, KARELIA	5	BASALT	64.65	30.75	3100	0.998287	1389.73	2.2497	47.5	0.95	15.39	11.48	0.19	9.38	12.63	1.91	0.19	0.04
Baltic	EVOLUTION OF YUZHNO-VYGOZERO GREENSTONE BELT, KARELIA	193	BASALT	64.65	30.75	3100	0.998809	1388.57	1.96745	49.69	0.77	14.74	11.72	0.21	7.89	13.07	1.64	0.1	0.06
Baltic	EVOLUTION OF YUZHNO-VYGOZERO GREENSTONE BELT, KARELIA	25	BASALT	64.65	30.75	3100	0.986126	1387.38	1.94372	50.36	1.09	16.39	11.89	0.2	6.89	9.3	2.53	0.01	0.08
southern West Greenland	ACCRETION AND EVOLUTION OF AN ARCHEAN HIGH-GRADE GREY GNEISS-AMPHIBOLITE COMPLEX: THE FISKEFJORD AREA, SOUTHERN WEST GREENLAND	328228	basalt	64.9901	-51.7321	3100	0.999938	1375.79	1.83067	51.44	1.05	9.25	11.78	0.19	10.89	10.17	2.38	1.01	0.15
Baltic	EVOLUTION OF YUZHNO-VYGOZERO GREENSTONE BELT, KARELIA	45811	BASALT	64.65	30.75	3100	0.999488	1375.58	2.15467	46.6	1.01	15.66	10.84	0.19	8.05	13.37	1.67	0.46	0.06
Baltic	EVOLUTION OF YUZHNO-VYGOZERO GREENSTONE BELT, KARELIA	45810	BASALT	64.65	30.75	3100	0.999903	1374.04	2.17885	48.53	1.04	15.68	11.18	0.19	9.16	12.84	2.42	0.31	0.06
Baltic	EVOLUTION OF YUZHNO-VYGOZERO GREENSTONE BELT, KARELIA	235	BASALT	64.65	30.75	3100	0.998272	1368.19	1.53697	51.35	0.77	14.64	11.56	0.19	7.59	11.15	1.1	0.02	0.06
Baltic	EVOLUTION OF YUZHNO-VYGOZERO GREENSTONE BELT, KARELIA	137	BASALT	64.65	30.75	3100	0.999141	1367.61	1.93534	49.11	0.74	16.56	11.29	0.19	8.86	11.38	1.94	0.1	0.06
Baltic	EVOLUTION OF YUZHNO-VYGOZERO GREENSTONE BELT, KARELIA	15	BASALT	64.65	30.75	3100	0.999099	1367.49	1.86441	50.07	1.03	15.8	11.19	0.21	6.96	12.09	2.09	0.31	0.08
southern West Greenland	ACCRETION AND EVOLUTION OF AN ARCHEAN HIGH-GRADE GREY GNEISS-AMPHIBOLITE COMPLEX: THE FISKEFJORD AREA, SOUTHERN WEST GREENLAND	328229	basalt	65.0117	-51.7246	3100	0.999938	1366.25	1.72026	51.07	0.88	7.99	11.45	0.2	13.62	10.49	1.96	0.74	0.12
Baltic	EVOLUTION OF YUZHNO-VYGOZERO GREENSTONE BELT, KARELIA	58	BASALT	64.65	30.75	3100	0.99912	1363.93	1.80739	50.15	0.86	15.57	11.22	0.15	7.84	11.03	2.16	0.21	0.07
Baltic	EVOLUTION OF YUZHNO-VYGOZERO GREENSTONE BELT, KARELIA	216	BASALT	64.65	30.75	3100	0.997201	1362.48	1.65594	50.74	0.7	15.25	11.31	0.2	7.93	12.02	1.34	0.2	0.04
Baltic	EVOLUTION OF YUZHNO-VYGOZERO GREENSTONE BELT, KARELIA	70	BASALT	64.65	30.75	3100	0.997093	1355.35	2.05748	48.48	0.84	16.91	10.8	0.23	8.72	9.34	3.22	0.36	0.06
Baltic	EVOLUTION OF YUZHNO-VYGOZERO GREENSTONE BELT, KARELIA	218	BASALT	64.65	30.75	3100	0.997487	1354.06	1.75984	49.61	0.73	15.74	10.88	0.21	8.16	12.09	1.95	0.07	0.04
Baltic	EVOLUTION OF YUZHNO-VYGOZERO GREENSTONE BELT, KARELIA	131	BASALT	64.65	30.75	3100	0.998377	1353.31	1.91683	48.25	0.73	16.03	10.66	0.2	8.99	12.05	1.95	0.36	0.06
Baltic	EVOLUTION OF YUZHNO-VYGOZERO GREENSTONE BELT, KARELIA	42	BASALT	64.65	30.75	3100	0.997838	1346.48	2.03868	48.69	0.74	15.86	10.47	0	9.01	10.44	3.87	0.06	0.04
Baltic	EVOLUTION OF YUZHNO-VYGOZERO GREENSTONE BELT, KARELIA	148	BASALT	64.65	30.75	3100	0.998331	1343.33	1.52231	48.75	0.48	13.96	10.37	0.24	9.15	16.29	0.49	0.06	0.06
Baltic	EVOLUTION OF YUZHNO-VYGOZERO GREENSTONE BELT, KARELIA	57	BASALT	64.65	30.75	3100	0.999531	1342.01	1.81621	49.82	1.12	17.02	10.43	0.21	6.62	10.29	3.32	0.1	0.1
Baltic	EVOLUTION OF YUZHNO-VYGOZERO GREENSTONE BELT, KARELIA	144	BASALT	64.65	30.75	3100	0.998981	1341.12	1.64155	50.88	0.8	15	10.74	0.19	8.13	11.32	2.27	0.37	0.06
Baltic	EVOLUTION OF YUZHNO-VYGOZERO GREENSTONE BELT, KARELIA	62	BASALT	64.65	30.75	3100	0.999243	1338.55	1.81239	49.51	0.77	16.33	10.36	0.2	7.79	10.98	2.96	0.27	0.24
Baltic	EVOLUTION OF YUZHNO-VYGOZERO GREENSTONE BELT, KARELIA	132	BASALT	64.65	30.75	3100	0.999151	1337.81	1.75129	49.79	0.82	16.46	10.53	0.2	8.75	10.91	2.61	0.06	0.07
Baltic	EVOLUTION OF YUZHNO-VYGOZERO GREENSTONE BELT, KARELIA	26	BASALT	64.65	30.75	3100	0.997306	1336.42	1.62186	50.23	0.94	15.58	10.55	0.2	8.23	10.64	2.12	0.36	0.06
Baltic	EVOLUTION OF YUZHNO-VYGOZERO GREENSTONE BELT, KARELIA	60	BASALT	64.65	30.75	3100	0.987722	1332.19	1.64788	50.2	0.89	15.78	10.41	0.21	8.11	10.75	2.53	0.25	0.07
Baltic	EVOLUTION OF YUZHNO-VYGOZERO GREENSTONE BELT, KARELIA	239	BASALT	64.65	30.75	3100	0.999509	1329.52	1.65003	50.92	0.78	15.37	10.5	0.17	8.82	8.46	3.42	0.25	0.04
Baltic	EVOLUTION OF YUZHNO-VYGOZERO GREENSTONE BELT, KARELIA	61	BASALT	64.65	30.75	3100	0.998739	1324.03	1.76969	48.97	0.92	15.42	10.02	0.22	8.95	10.4	2.58	0.92	0.06
Baltic	EVOLUTION OF YUZHNO-VYGOZERO GREENSTONE BELT, KARELIA	45820	BASALT	64.65	30.75	3100	0.998202	1318.74	1.43812	51.27	0.67	15.15	10.18	0.17	8.13	10.26	2.42	0.27	0.04
Baltic	EVOLUTION OF YUZHNO-VYGOZERO GREENSTONE BELT, KARELIA	32A	BASALT	64.65	30.75	3100	0.999071	1318.7	1.4696	50.57	0.99	15.24	10.24	0.2	9.15	9.75	2.19	0.25	0.14
Baltic	EVOLUTION OF YUZHNO-VYGOZERO GREENSTONE BELT, KARELIA	242	BASALT	64.65	30.75	3100	0.999032	1303.98	1.44764	49.87	0.77	15.92	9.6	0.2	8.55	11.48	2.18	0.2	0.04
NW ONTARIO, CANADA	MAJOR AND TRACE ELEMENT GEOCHEMISTRY AND GENESIS OF SUPRACRUSTAL ROCKS OF THE NORTH SPIRIT LAKE GREENSTONE BELT, NW ONTARIO, CANADA	45663	BASALT	52.4	-92.75	3100	0.920072	1289.38	0.922485	51.36	0.54	11.23	9.29	0.2	8.23	14.26	0.89	0.12	0.05
Baltic	EVOLUTION OF YUZHNO-VYGOZERO GREENSTONE BELT, KARELIA	45	BASALT	64.65	30.75	3100	0.998876	1286.09	1.30939	51.43	0.76	14.72	9.35	0.23	8.6	9.4	3.4	0.01	0.04
southern West Greenland	ACCRETION AND EVOLUTION OF AN ARCHEAN HIGH-GRADE GREY GNEISS-AMPHIBOLITE COMPLEX: THE FISKEFJORD AREA, SOUTHERN WEST GREENLAND	278812	basalt	64.8809	-51.1523	3100	0.977284	1282.9	1.0534	53.34	0.62	13.41	9.67	0.16	9.81	9.23	1.99	0.52	0.08
Baltic	EVOLUTION OF YUZHNO-VYGOZERO GREENSTONE BELT, KARELIA	43	BASALT	64.65	30.75	3100	0.998775	1280.69	1.22549	50.69	0.93	15.02	9	0.19	7.63	11.04	2.6	0.05	0.05
southern West Greenland	ACCRETION AND EVOLUTION OF AN ARCHEAN HIGH-GRADE GREY GNEISS-AMPHIBOLITE COMPLEX: THE FISKEFJORD AREA, SOUTHERN WEST GREENLAND	289116	basalt	64.7597	-51.6609	3100	0.940391	1278.76	0.992699	53.7	0.46	10.97	9.7	0.16	13.3	7.49	1.99	0.69	0.09
Baltic	EVOLUTION OF YUZHNO-VYGOZERO GREENSTONE BELT, KARELIA	46	BASALT	64.65	30.75	3100	0.999244	1277.82	1.28807	49.54	0.72	16.02	8.97	0.2	8.89	10.03	2.42	0.1	0.04
southern West Greenland	ACCRETION AND EVOLUTION OF AN ARCHEAN HIGH-GRADE GREY GNEISS-AMPHIBOLITE COMPLEX: THE FISKEFJORD AREA, SOUTHERN WEST GREENLAND	328143	basalt	64.8585	-51.6492	3100	0.99993	1267	0.938823	53.79	0.47	11.47	9.39	0.17	12.79	7.77	1.96	0.73	0.1
southern West Greenland	ACCRETION AND EVOLUTION OF AN ARCHEAN HIGH-GRADE GREY GNEISS-AMPHIBOLITE COMPLEX: THE FISKEFJORD AREA, SOUTHERN WEST GREENLAND	339196	basalt	64.8	-51.9	3100	0.999241	1266.65	0.97692	53.21	0.46	10.95	9.34	0.17	14.74	7.3	1.85	0.77	0.11
southern West Greenland	ACCRETION AND EVOLUTION OF AN ARCHEAN HIGH-GRADE GREY GNEISS-AMPHIBOLITE COMPLEX: THE FISKEFJORD AREA, SOUTHERN WEST GREENLAND	289093	basalt	64.9439	-50.9972	3100	0.973845	1265.87	0.974321	52.67	0.6	13.8	8.97	0.16	8.75	10.08	1.94	0.48	0.08
southern West Greenland	ACCRETION AND EVOLUTION OF AN ARCHEAN HIGH-GRADE GREY GNEISS-AMPHIBOLITE COMPLEX: THE FISKEFJORD AREA, SOUTHERN WEST GREENLAND	339105	basalt	64.8657	-51.9441	3100	0.974489	1251.94	1.00263	52.34	0.42	12.31	8.78	0.15	13.7	8.21	2.13	0.63	0.11
southern West Greenland	EVIDENCE FOR HFSE AND REE MOBILITY DURING CALC-SILICATE METASOMATISM, MESOARCHEAN (~3075 MA) IVISAARTOQ GREENSTONE BELT, SOUTHERN WEST GREENLAND	496117	BASALT	64.7308	-49.9469	3075	0.991789	1406.78	2.24189	48.57	0.65	15.42	12.23	0.19	8.84	10.4	2.13	0.15	0.05
southern West Greenland	FIELD AND GEOCHEMICAL CHARACTERISTICS OF THE MESOARCHEAN (~3075 MA) IVISAARTOQ GREENSTONE BELT, SOUTHERN WEST GREENLAND: EVIDENCE FOR SEAFLOOR HYDROTHERMAL ALTERATION IN SUPRA-SUBDUCTION OCEANIC CRUST	485461	BASALT	64.7484	-49.8638	3075	0.962807	1392.75	2.19488	47.47	0.56	14.74	11.56	0.24	9.4	12.9	1.61	0.21	0.03
southern West Greenland	FIELD AND GEOCHEMICAL CHARACTERISTICS OF THE MESOARCHEAN (~3075 MA) IVISAARTOQ GREENSTONE BELT, SOUTHERN WEST GREENLAND: EVIDENCE FOR SEAFLOOR HYDROTHERMAL ALTERATION IN SUPRA-SUBDUCTION OCEANIC CRUST	485460	BASALT	64.7484	-49.8638	3075	0.972541	1388.48	2.16578	47.44	0.56	14.85	11.43	0.24	9.38	12.98	1.63	0.19	0.03
southern West Greenland	EVIDENCE FOR HFSE AND REE MOBILITY DURING CALC-SILICATE METASOMATISM, MESOARCHEAN (~3075 MA) IVISAARTOQ GREENSTONE BELT, SOUTHERN WEST GREENLAND	496118	BASALT	64.7317	-49.9421	3075	0.953898	1386.54	1.95813	48.33	0.61	15.25	11.56	0.21	8.47	13.13	1.08	0.05	0.04
southern West Greenland	FIELD AND GEOCHEMICAL CHARACTERISTICS OF THE MESOARCHEAN (~3075 MA) IVISAARTOQ GREENSTONE BELT, SOUTHERN WEST GREENLAND: EVIDENCE FOR SEAFLOOR HYDROTHERMAL ALTERATION IN SUPRA-SUBDUCTION OCEANIC CRUST	485465	BASALT	64.7484	-49.8638	3075	0.977079	1385.96	2.00843	48.22	0.57	13.15	11.54	0.26	10.4	13.06	1.33	0.15	0.03
southern West Greenland	FIELD AND GEOCHEMICAL CHARACTERISTICS OF THE MESOARCHEAN (~3075 MA) IVISAARTOQ GREENSTONE BELT, SOUTHERN WEST GREENLAND: EVIDENCE FOR SEAFLOOR HYDROTHERMAL ALTERATION IN SUPRA-SUBDUCTION OCEANIC CRUST	485418	basalt	64.7396	-49.9355	3075	0.98504	1371.73	1.88081	48.41	0.43	10.87	11.26	0.22	14.9	11.26	1.23	0.15	0.02
southern West Greenland	FIELD AND GEOCHEMICAL CHARACTERISTICS OF THE MESOARCHEAN (~3075 MA) IVISAARTOQ GREENSTONE BELT, SOUTHERN WEST GREENLAND: EVIDENCE FOR SEAFLOOR HYDROTHERMAL ALTERATION IN SUPRA-SUBDUCTION OCEANIC CRUST	485458	BASALT	64.7484	-49.8638	3075	0.905222	1361.84	1.84956	48.52	0.57	14.16	10.88	0.22	9.45	13.18	1.62	0.16	0.04
southern West Greenland	FIELD AND GEOCHEMICAL CHARACTERISTICS OF THE MESOARCHEAN (~3075 MA) IVISAARTOQ GREENSTONE BELT, SOUTHERN WEST GREENLAND: EVIDENCE FOR SEAFLOOR HYDROTHERMAL ALTERATION IN SUPRA-SUBDUCTION OCEANIC CRUST	485462	BASALT	64.7484	-49.8638	3075	0.974305	1356.19	1.6767	50.32	0.55	12.23	11.11	0.24	10.32	11.83	1.86	0.25	0.04
southern West Greenland	FIELD AND GEOCHEMICAL CHARACTERISTICS OF THE MESOARCHEAN (~3075 MA) IVISAARTOQ GREENSTONE BELT, SOUTHERN WEST GREENLAND: EVIDENCE FOR SEAFLOOR HYDROTHERMAL ALTERATION IN SUPRA-SUBDUCTION OCEANIC CRUST	485417	basalt	64.7394	-49.9354	3075	0.920436	1347.44	1.74892	47.94	0.45	11.26	10.5	0.18	14.81	12.33	1.2	0.14	0.03
southern West Greenland	FIELD AND GEOCHEMICAL CHARACTERISTICS OF THE MESOARCHEAN (~3075 MA) IVISAARTOQ GREENSTONE BELT, SOUTHERN WEST GREENLAND: EVIDENCE FOR SEAFLOOR HYDROTHERMAL ALTERATION IN SUPRA-SUBDUCTION OCEANIC CRUST	485466	BASALT	64.7484	-49.8638	3075	0.988882	1342.72	1.62239	49.89	0.5	13.36	10.64	0.21	9.8	12.35	1.86	0.16	0.05
southern West Greenland	FIELD AND GEOCHEMICAL CHARACTERISTICS OF THE MESOARCHEAN (~3075 MA) IVISAARTOQ GREENSTONE BELT, SOUTHERN WEST GREENLAND: EVIDENCE FOR SEAFLOOR HYDROTHERMAL ALTERATION IN SUPRA-SUBDUCTION OCEANIC CRUST	485457	BASALT	64.7484	-49.8638	3075	0.930599	1338.35	1.63812	49.48	0.56	14.55	10.41	0.23	8.65	12.89	1.89	0.15	0.04
southern West Greenland	FIELD AND GEOCHEMICAL CHARACTERISTICS OF THE MESOARCHEAN (~3075 MA) IVISAARTOQ GREENSTONE BELT, SOUTHERN WEST GREENLAND: EVIDENCE FOR SEAFLOOR HYDROTHERMAL ALTERATION IN SUPRA-SUBDUCTION OCEANIC CRUST	485459	BASALT	64.7484	-49.8638	3075	0.974519	1312.49	1.27059	51.97	0.53	13.28	10.07	0.22	8.59	12.08	1.94	0.15	0.04
southern West Greenland	FIELD AND GEOCHEMICAL CHARACTERISTICS OF THE MESOARCHEAN (~3075 MA) IVISAARTOQ GREENSTONE BELT, SOUTHERN WEST GREENLAND: EVIDENCE FOR SEAFLOOR HYDROTHERMAL ALTERATION IN SUPRA-SUBDUCTION OCEANIC CRUST	485453	BASALT	64.7484	-49.8638	3075	0.978475	1302.95	1.35365	51.39	0.58	14.57	9.75	0.2	8.24	11.41	2.56	0.18	0.02
southern West Greenland	FIELD AND GEOCHEMICAL CHARACTERISTICS OF THE MESOARCHEAN (~3075 MA) IVISAARTOQ GREENSTONE BELT, SOUTHERN WEST GREENLAND: EVIDENCE FOR SEAFLOOR HYDROTHERMAL ALTERATION IN SUPRA-SUBDUCTION OCEANIC CRUST	485464	BASALT	64.7484	-49.8638	3075	0.92739	1300.4	1.37067	51.12	0.54	14.72	9.58	0.19	8.21	11.71	2.63	0.18	0.05
southern West Greenland	FIELD AND GEOCHEMICAL CHARACTERISTICS OF THE MESOARCHEAN (~3075 MA) IVISAARTOQ GREENSTONE BELT, SOUTHERN WEST GREENLAND: EVIDENCE FOR SEAFLOOR HYDROTHERMAL ALTERATION IN SUPRA-SUBDUCTION OCEANIC CRUST	485451	BASALT	64.7484	-49.8638	3075	0.95777	1287.22	1.11167	51.33	0.56	14.02	9.18	0.22	7.86	14.16	1.5	0.11	0.04
SW Greenland	THE ORIGIN OF GEOCHEMICAL TRENDS AND EOARCHEAN (CA. 3700 MA) ZIRCONS IN MESOARCHEAN (CA. 3075 MA) OCELLI-HOSTING PILLOW BASALTS, IVISAARTOQ GREENSTONE BELT, SW GREENLAND: EVIDENCE FOR CRUSTAL CONTAMINATION VERSUS CRUSTAL RECYCLING	499710B	BASALT	64.7487	-49.8627	3062	0.978486	1434.01	2.40109	48.1	0.56	11.9	12.69	0.26	10.7	13	1.23	0.21	0.03
SW Greenland	THE ORIGIN OF GEOCHEMICAL TRENDS AND EOARCHEAN (CA. 3700 MA) ZIRCONS IN MESOARCHEAN (CA. 3075 MA) OCELLI-HOSTING PILLOW BASALTS, IVISAARTOQ GREENSTONE BELT, SW GREENLAND: EVIDENCE FOR CRUSTAL CONTAMINATION VERSUS CRUSTAL RECYCLING	499705MA	BASALT	64.7467	-49.8589	3062	0.917474	1401.14	2.05828	48.7	0.6	13	11.97	0.23	9.5	13.3	1.23	0.16	0.05
SW Greenland	THE ORIGIN OF GEOCHEMICAL TRENDS AND EOARCHEAN (CA. 3700 MA) ZIRCONS IN MESOARCHEAN (CA. 3075 MA) OCELLI-HOSTING PILLOW BASALTS, IVISAARTOQ GREENSTONE BELT, SW GREENLAND: EVIDENCE FOR CRUSTAL CONTAMINATION VERSUS CRUSTAL RECYCLING	499702MA	BASALT	64.7463	-49.8599	3062	0.903734	1386.46	1.99551	48.2	0.63	14.2	11.43	0.25	8.7	13.7	1.2	0.21	0.05
SW Greenland	THE ORIGIN OF GEOCHEMICAL TRENDS AND EOARCHEAN (CA. 3700 MA) ZIRCONS IN MESOARCHEAN (CA. 3075 MA) OCELLI-HOSTING PILLOW BASALTS, IVISAARTOQ GREENSTONE BELT, SW GREENLAND: EVIDENCE FOR CRUSTAL CONTAMINATION VERSUS CRUSTAL RECYCLING	499713B	BASALT	64.749	-49.8595	3062	0.985295	1347.26	1.79995	48.3	0.61	15.8	10.53	0.22	9	12.3	1.69	0.25	0.05
southern West Greenland	FIELD AND GEOCHEMICAL CHARACTERISTICS OF MESOARCHEAN TO NEOARCHEAN VOLCANIC ROCKS IN THE STOROE GREENSTONE BELT, SW GREENLAND: EVIDENCE FOR ACCRETION OF INTRA-OCEANIC VOLCANIC ARCS	485497	BASALT	64.4047	-51.0918	3060	0.997453	1404.16	2.48242	46.59	0.83	15.39	11.74	0.26	9.94	11.34	2.14	0.34	0.13
southern West Greenland	FIELD AND GEOCHEMICAL CHARACTERISTICS OF MESOARCHEAN TO NEOARCHEAN VOLCANIC ROCKS IN THE STOROE GREENSTONE BELT, SW GREENLAND: EVIDENCE FOR ACCRETION OF INTRA-OCEANIC VOLCANIC ARCS	493126	BASALT	64.4309	-51.0223	3060	0.99128	1337.24	1.45371	52.22	0.59	13.66	10.83	0.19	8.45	10.26	2.37	0.19	0.05
Superior	OCEANIC SPREADING CENTER-GENERATED BASALTIC CRUST AND ASSOCIATED SULFIDIC AND CARBONATE-RICH HYDROTHERMAL DEPOSITS IN THE ARCHEAN (CA. 3 GA), NORTH SPIRIT LAKE GREENSTONE BELT, ONTARIO, CANADA	45690	BASALT	52.5	-92.85	3023	0.99957	1465.37	2.30576	46.74	0.63	8.87	13.45	0.15	16.92	4.56	0.59	0.13	0.04
Superior	OCEANIC SPREADING CENTER-GENERATED BASALTIC CRUST AND ASSOCIATED SULFIDIC AND CARBONATE-RICH HYDROTHERMAL DEPOSITS IN THE ARCHEAN (CA. 3 GA), NORTH SPIRIT LAKE GREENSTONE BELT, ONTARIO, CANADA	45661	BASALT	52.5	-92.85	3023	0.999513	1343.49	1.43898	50.03	0.76	14.5	10.76	0.2	8.07	10.89	0.95	0.32	0.06
Superior	OCEANIC SPREADING CENTER-GENERATED BASALTIC CRUST AND ASSOCIATED SULFIDIC AND CARBONATE-RICH HYDROTHERMAL DEPOSITS IN THE ARCHEAN (CA. 3 GA), NORTH SPIRIT LAKE GREENSTONE BELT, ONTARIO, CANADA	45659	BASALT	52.5	-92.85	3023	0.999513	1297.03	1.04225	49.87	0.58	12.88	9.54	0.19	8.98	9.4	1.11	0.12	0.05
Superior	OCEANIC SPREADING CENTER-GENERATED BASALTIC CRUST AND ASSOCIATED SULFIDIC AND CARBONATE-RICH HYDROTHERMAL DEPOSITS IN THE ARCHEAN (CA. 3 GA), NORTH SPIRIT LAKE GREENSTONE BELT, ONTARIO, CANADA	45663	BASALT	52.5	-92.85	3023	0.99943	1289.38	0.922485	51.36	0.54	11.23	9.29	0.2	8.23	14.26	0.89	0.12	0.05
Superior	OCEANIC SPREADING CENTER-GENERATED BASALTIC CRUST AND ASSOCIATED SULFIDIC AND CARBONATE-RICH HYDROTHERMAL DEPOSITS IN THE ARCHEAN (CA. 3 GA), NORTH SPIRIT LAKE GREENSTONE BELT, ONTARIO, CANADA	45660	BASALT	52.5	-92.85	3023	0.999496	1284.38	0.99078	52.35	0.74	15.69	9.27	0.17	6.3	7.7	2.15	0.14	0.05
Yilgarn	GEOCHEMISTRY OF A KOMATIITIC, BONINITIC, AND THOLEIITIC BASALT ASSOCIATION IN THE MESOARCHEAN KOOLYANOBBING GREENSTONE BELT, SOUTHERN CROSS DOMAIN, YILGARN CRATON: IMPLICATIONS FOR MANTLE SOURCES AND GEODYNAMIC SETTING OF BANDED IRON FORMATION	KM-3	BASALT	-30.82	119.52	3023	0.97541	1271.28	1.11453	52.76	0.33	14.73	9.26	0.3	9.31	4.74	4.17	0.11	0.04
SW Greenland	GEOCHEMISTRY AND GEODYNAMIC ORIGIN OF THE MESOARCHEAN UJARASSUIT AND IVISAARTOQ GREENSTONE BELTS, SW GREENLAND	49821J	THOLEIITE	64.849	-49.9867	3021	0.925214	1501.56	3.33585	47.2	1.01	16.15	14.14	0.24	6.34	10.28	2.81	0.13	0.09
SW Greenland	GEOCHEMISTRY AND GEODYNAMIC ORIGIN OF THE MESOARCHEAN UJARASSUIT AND IVISAARTOQ GREENSTONE BELTS, SW GREENLAND	498281	THOLEIITE	64.8964	-50.2526	3021	0.983863	1396.4	2.16645	49.2	1	14.7	11.8	0.21	7.43	11.88	2.44	0.26	0.08
SW Greenland	GEOCHEMISTRY AND GEODYNAMIC ORIGIN OF THE MESOARCHEAN UJARASSUIT AND IVISAARTOQ GREENSTONE BELTS, SW GREENLAND	498219	THOLEIITE	64.9024	-50.2333	3021	0.997746	1394.12	2.12909	49.3	0.72	14.93	11.93	0.21	8.44	10.37	2.3	0.44	0.05
SW Greenland	GEOCHEMISTRY AND GEODYNAMIC ORIGIN OF THE MESOARCHEAN UJARASSUIT AND IVISAARTOQ GREENSTONE BELTS, SW GREENLAND	498218	basalt	64.8778	-50.2131	3021	0.997861	1390.34	2.27229	48.1	0.65	16.03	11.65	0.2	8.66	10.28	2.7	0.35	0.07
SW Greenland	GEOCHEMISTRY AND GEODYNAMIC ORIGIN OF THE MESOARCHEAN UJARASSUIT AND IVISAARTOQ GREENSTONE BELTS, SW GREENLAND	498229	THOLEIITE	64.8565	-50.1919	3021	0.985895	1383.65	2.2122	48.1	0.8	16.24	11.43	0.22	8.39	10.62	2.79	0.13	0.06
SW Greenland	GEOCHEMISTRY AND GEODYNAMIC ORIGIN OF THE MESOARCHEAN UJARASSUIT AND IVISAARTOQ GREENSTONE BELTS, SW GREENLAND	498206	THOLEIITE	64.8786	-50.2202	3021	0.994674	1362.96	1.81021	50.1	0.66	14.9	11.05	0.21	7.13	12.08	1.81	0.79	0.05
SW Greenland	GEOCHEMISTRY AND GEODYNAMIC ORIGIN OF THE MESOARCHEAN UJARASSUIT AND IVISAARTOQ GREENSTONE BELTS, SW GREENLAND	498224	THOLEIITE	64.8928	-50.2145	3021	0.99935	1361.38	1.91703	48.6	0.62	15.8	10.84	0.21	7.88	12.47	1.84	0.5	0.06
SW Greenland	GEOCHEMISTRY AND GEODYNAMIC ORIGIN OF THE MESOARCHEAN UJARASSUIT AND IVISAARTOQ GREENSTONE BELTS, SW GREENLAND	498274	THOLEIITE	64.918	-50.2053	3021	0.953974	1350.13	1.59657	50.5	0.76	15.3	10.93	0.19	7.99	11.24	1.63	0.18	0.06
SW Greenland	GEOCHEMISTRY AND GEODYNAMIC ORIGIN OF THE MESOARCHEAN UJARASSUIT AND IVISAARTOQ GREENSTONE BELTS, SW GREENLAND	498256B	THOLEIITE	64.8809	-49.9539	3021	0.914273	1318.83	1.51255	49.2	0.4	13.81	10.01	0.21	11.26	12.47	1.32	0.44	0.03
SW Greenland	GEOCHEMISTRY AND GEODYNAMIC ORIGIN OF THE MESOARCHEAN UJARASSUIT AND IVISAARTOQ GREENSTONE BELTS, SW GREENLAND	498248	THOLEIITE	64.8581	-50.1908	3021	0.998038	1281.85	1.06302	52	0.33	14.63	9.73	0.17	13.06	7.32	1.63	0.04	0.03
SW Greenland	GEOCHEMISTRY AND GEODYNAMIC ORIGIN OF THE MESOARCHEAN UJARASSUIT AND IVISAARTOQ GREENSTONE BELTS, SW GREENLAND	498273	basalt	64.8776	-50.2148	3021	0.983829	1281.12	1.00638	52.5	0.61	13.55	9.07	0.2	7	14.3	1.56	0.19	0.04
SW Greenland	GEOCHEMISTRY AND GEODYNAMIC ORIGIN OF THE MESOARCHEAN UJARASSUIT AND IVISAARTOQ GREENSTONE BELTS, SW GREENLAND	498227	basalt	64.8827	-50.2181	3021	0.986653	1268.62	0.811625	54	0.65	13.09	8.86	0.21	6.61	14.07	1.3	0.19	0.05
SW Greenland	GEOCHEMISTRY AND GEODYNAMIC ORIGIN OF THE MESOARCHEAN UJARASSUIT AND IVISAARTOQ GREENSTONE BELTS, SW GREENLAND	498228	THOLEIITE	64.89	-50.0291	3021	0.9991	1267.75	0.960668	53.3	0.32	15.19	9.4	0.21	10.75	7.58	1.87	0.32	0.04
SW Greenland	GEOCHEMISTRY AND GEODYNAMIC ORIGIN OF THE MESOARCHEAN UJARASSUIT AND IVISAARTOQ GREENSTONE BELTS, SW GREENLAND	498239	THOLEIITE	64.85	-50.1971	3021	0.948942	1267.04	0.835536	53.7	0.33	15.83	9.51	0.14	10.85	7.17	1.33	0.02	0.04
SW Greenland	THE ORIGIN AND COMPOSITIONS OF MESOARCHEAN OCEANIC CRUST: EVIDENCE FROM THE 3075 MA IVISAARTOQ GREENSTONE BELT, SW GREENLAND	485469	BASALT	64.7469	-49.858	3012.5	0.904938	1305.02	1.40678	50.95	0.56	14.49	9.76	0.17	8.9	11.27	2.63	0.14	0.05
SW Greenland	THE ORIGIN AND COMPOSITIONS OF MESOARCHEAN OCEANIC CRUST: EVIDENCE FROM THE 3075 MA IVISAARTOQ GREENSTONE BELT, SW GREENLAND	485470	BASALT	64.7469	-49.858	3012.5	0.944862	1284.47	1.17156	51.74	0.54	14.32	9.3	0.17	8.59	11.94	2.16	0.16	0.05
Aldan Shield	PETROLOGY OF MAFIC-ULTRAMAFIC METAVOLCANICS AND RELATED ROCKS FROM THE OLONDO GREENSTONE BELT, ALDAN SHIELD	86232	BASALT	57.03	120.72	3006	0.992761	1583.21	4.27697	46.6	2.12	11.7	20.3	0.22	6.52	9.9	2.15	0.3	0.2
Aldan Shield	PETROLOGY OF MAFIC-ULTRAMAFIC METAVOLCANICS AND RELATED ROCKS FROM THE OLONDO GREENSTONE BELT, ALDAN SHIELD	86230/2	BASALT	57.03	120.72	3006	0.995691	1562.77	3.69703	47.7	2.09	11.8	19.8	0.22	6.29	10.5	1.06	0.33	0.22
Aldan Shield	PETROLOGY OF MAFIC-ULTRAMAFIC METAVOLCANICS AND RELATED ROCKS FROM THE OLONDO GREENSTONE BELT, ALDAN SHIELD	89101/1	BASALT	57.03	120.72	3006	0.94562	1473.26	2.76376	48.2	1.05	15.1	13.9	0.19	8.21	11.8	1.03	0.24	0.25
Aldan Shield	PETROLOGY OF MAFIC-ULTRAMAFIC METAVOLCANICS AND RELATED ROCKS FROM THE OLONDO GREENSTONE BELT, ALDAN SHIELD	8528	BASALT	57.03	120.72	3006	0.977854	1469.34	2.9913	47.6	1.08	15.3	13.5	0.18	8.09	11.6	2.22	0.29	0.17
Aldan Shield	PETROLOGY OF MAFIC-ULTRAMAFIC METAVOLCANICS AND RELATED ROCKS FROM THE OLONDO GREENSTONE BELT, ALDAN SHIELD	2428225	BASALT	57.03	120.72	3006	0.998193	1466.29	2.81978	48.4	0.99	15.2	13.6	0.19	7.72	11.5	1.87	0.36	0.19
Aldan Shield	PETROLOGY OF MAFIC-ULTRAMAFIC METAVOLCANICS AND RELATED ROCKS FROM THE OLONDO GREENSTONE BELT, ALDAN SHIELD	89111/2	BASALT	57.03	120.72	3006	0.978336	1464.59	2.46772	49	0.76	7.69	13.6	0.2	15.4	12.5	0.46	0.12	0.27
Aldan Shield	PETROLOGY OF MAFIC-ULTRAMAFIC METAVOLCANICS AND RELATED ROCKS FROM THE OLONDO GREENSTONE BELT, ALDAN SHIELD	110/3	BASALT	57.03	120.72	3006	0.982901	1454.72	2.2703	49.7	0.75	7.73	13.5	0.21	15.3	12.1	0.32	0.11	0.25
Aldan Shield	PETROLOGY OF MAFIC-ULTRAMAFIC METAVOLCANICS AND RELATED ROCKS FROM THE OLONDO GREENSTONE BELT, ALDAN SHIELD	89113/3	BASALT	57.03	120.72	3006	0.965469	1452.96	2.41389	49.4	0.83	8.8	13.4	0.2	13.4	12.7	0.99	0.13	0.23
Aldan Shield	PETROLOGY OF MAFIC-ULTRAMAFIC METAVOLCANICS AND RELATED ROCKS FROM THE OLONDO GREENSTONE BELT, ALDAN SHIELD	89111/1	BASALT	57.03	120.72	3006	0.980432	1452.95	2.34656	49.3	0.77	8.11	13.4	0.2	15.1	12.2	0.53	0.15	0.26
Aldan Shield	PETROLOGY OF MAFIC-ULTRAMAFIC METAVOLCANICS AND RELATED ROCKS FROM THE OLONDO GREENSTONE BELT, ALDAN SHIELD	89114/1	BASALT	57.03	120.72	3006	0.988833	1452.9	2.35248	49.5	0.74	7.44	13.4	0.19	15.5	12.2	0.74	0.12	0.19
Aldan Shield	PETROLOGY OF MAFIC-ULTRAMAFIC METAVOLCANICS AND RELATED ROCKS FROM THE OLONDO GREENSTONE BELT, ALDAN SHIELD	89101/2	BASALT	57.03	120.72	3006	0.960059	1451.71	2.61693	48.5	1.1	15.3	13.3	0.19	7.85	11.6	1.61	0.26	0.25
Aldan Shield	PETROLOGY OF MAFIC-ULTRAMAFIC METAVOLCANICS AND RELATED ROCKS FROM THE OLONDO GREENSTONE BELT, ALDAN SHIELD	105/1	BASALT	57.03	120.72	3006	0.934848	1449.94	2.47615	49.7	1.29	15	13.4	0.18	7.16	11.1	1.73	0.2	0.26
Aldan Shield	PETROLOGY OF MAFIC-ULTRAMAFIC METAVOLCANICS AND RELATED ROCKS FROM THE OLONDO GREENSTONE BELT, ALDAN SHIELD	89110/4	BASALT	57.03	120.72	3006	0.98175	1438.02	2.18439	49.7	0.78	8.46	13.1	0.2	13.9	12.8	0.64	0.15	0.28
Aldan Shield	PETROLOGY OF MAFIC-ULTRAMAFIC METAVOLCANICS AND RELATED ROCKS FROM THE OLONDO GREENSTONE BELT, ALDAN SHIELD	07/91	BASALT	57.03	120.72	3006	0.983501	1432.38	2.32828	49.1	0.69	6.94	12.7	0.2	17	11.7	1.32	0.15	0.2
Aldan Shield	PETROLOGY OF MAFIC-ULTRAMAFIC METAVOLCANICS AND RELATED ROCKS FROM THE OLONDO GREENSTONE BELT, ALDAN SHIELD	8553	BASALT	57.03	120.72	3006	0.995389	1427.38	2.4115	48.9	0.9	15.1	12.7	0.2	8.01	11.8	1.85	0.33	0.18
Aldan Shield	PETROLOGY OF MAFIC-ULTRAMAFIC METAVOLCANICS AND RELATED ROCKS FROM THE OLONDO GREENSTONE BELT, ALDAN SHIELD	105/3	BASALT	57.03	120.72	3006	0.992761	1425.31	2.40275	49.5	1.09	15.5	12.7	0.2	7.16	10.9	2.37	0.39	0.24
Aldan Shield	PETROLOGY OF MAFIC-ULTRAMAFIC METAVOLCANICS AND RELATED ROCKS FROM THE OLONDO GREENSTONE BELT, ALDAN SHIELD	110/2	BASALT	57.03	120.72	3006	0.979352	1424.63	2.09159	49.6	0.76	8.16	12.7	0.21	15	12.5	0.69	0.14	0.24
Aldan Shield	PETROLOGY OF MAFIC-ULTRAMAFIC METAVOLCANICS AND RELATED ROCKS FROM THE OLONDO GREENSTONE BELT, ALDAN SHIELD	105/4	BASALT	57.03	120.72	3006	0.964351	1417.11	2.29486	49.5	1.05	15.6	12.5	0.2	7.29	11.2	2.26	0.17	0.24
Aldan Shield	PETROLOGY OF MAFIC-ULTRAMAFIC METAVOLCANICS AND RELATED ROCKS FROM THE OLONDO GREENSTONE BELT, ALDAN SHIELD	106/2	BASALT	57.03	120.72	3006	0.956212	1416.05	2.12645	50.2	1.14	15.4	12.6	0.2	7.18	11.2	1.63	0.16	0.23
Aldan Shield	PETROLOGY OF MAFIC-ULTRAMAFIC METAVOLCANICS AND RELATED ROCKS FROM THE OLONDO GREENSTONE BELT, ALDAN SHIELD	8580	BASALT	57.03	120.72	3006	0.994536	1415.41	2.21113	49.2	0.78	15	12.5	0.2	8.4	12.2	1.49	0.13	0.14
Aldan Shield	PETROLOGY OF MAFIC-ULTRAMAFIC METAVOLCANICS AND RELATED ROCKS FROM THE OLONDO GREENSTONE BELT, ALDAN SHIELD	89109/2	BASALT	57.03	120.72	3006	0.917566	1412.85	2.05657	50.4	1.14	15.2	12.6	0.19	7.3	11.4	1.38	0.2	0.24
Aldan Shield	PETROLOGY OF MAFIC-ULTRAMAFIC METAVOLCANICS AND RELATED ROCKS FROM THE OLONDO GREENSTONE BELT, ALDAN SHIELD	2486388	BASALT	57.03	120.72	3006	0.994903	1410.61	1.89687	50.3	0.83	8.48	12.5	0.2	13.3	13.4	0.6	0.22	0.28
Aldan Shield	PETROLOGY OF MAFIC-ULTRAMAFIC METAVOLCANICS AND RELATED ROCKS FROM THE OLONDO GREENSTONE BELT, ALDAN SHIELD	89109/1	BASALT	57.03	120.72	3006	0.982837	1405.68	2.15313	49.5	1.19	15.5	12.2	0.19	7.6	11.6	1.77	0.26	0.24
Aldan Shield	PETROLOGY OF MAFIC-ULTRAMAFIC METAVOLCANICS AND RELATED ROCKS FROM THE OLONDO GREENSTONE BELT, ALDAN SHIELD	07/81	BASALT	57.03	120.72	3006	0.927509	1403.95	1.89659	50.5	0.84	8.66	12.3	0.19	12.6	13.4	1.18	0.1	0.25
Aldan Shield	PETROLOGY OF MAFIC-ULTRAMAFIC METAVOLCANICS AND RELATED ROCKS FROM THE OLONDO GREENSTONE BELT, ALDAN SHIELD	105/2	BASALT	57.03	120.72	3006	0.958747	1403.65	2.03588	50.3	1.12	15.3	12.3	0.18	7.26	11.4	1.74	0.15	0.25
Aldan Shield	PETROLOGY OF MAFIC-ULTRAMAFIC METAVOLCANICS AND RELATED ROCKS FROM THE OLONDO GREENSTONE BELT, ALDAN SHIELD	8523	BASALT	57.03	120.72	3006	0.990382	1396.97	2.21957	48.9	0.83	15.3	11.9	0.18	8.39	11.9	2.18	0.33	0.18
Aldan Shield	PETROLOGY OF MAFIC-ULTRAMAFIC METAVOLCANICS AND RELATED ROCKS FROM THE OLONDO GREENSTONE BELT, ALDAN SHIELD	2435836	BASALT	57.03	120.72	3006	0.978247	1394.31	1.99193	49.3	0.85	15.2	12	0.19	8.63	12.2	1.18	0.17	0.25
Aldan Shield	PETROLOGY OF MAFIC-ULTRAMAFIC METAVOLCANICS AND RELATED ROCKS FROM THE OLONDO GREENSTONE BELT, ALDAN SHIELD	2435864	BASALT	57.03	120.72	3006	0.998657	1371.71	1.76216	50	0.79	14.9	11.5	0.18	8.86	12.2	1.13	0.22	0.2
Pilbara	USE OF GEOCHEMISTRY AS A GUIDE TO PLATINUM GROUP ELEMENT POTENTIAL OF MAFIC-ULTRAMAFIC ROCKS; EXAMPLES FROM THE WEST PILBARA BLOCKS AND HALLS CREEK MOBILE ZONE, WESTERN AUSTRALIA	NGV2	BASALT	-21	118	3000	0.928887	1262.42	0.802031	53.63	0.4	11.21	9.16	0.16	10.99	7.9	1.77	0.55	0.04
western superior province	PLUME MAGMATISM AND CRUSTAL GROWTH AT 2.9 TO 3.0 GA IN THE STEEP ROCK AND LUMBY LAKE AREA, WESTERN SUPERIOR PROVINCE	96KYT18	BASALT	49	-91	2986	0.995833	1257.44	1.30121	49.93	1.39	12.36	8.46	0.15	11.49	8.48	3.07	1.01	0.3
Superior	USING SEDIMENT GEOCHEMISTRY AND DETRITAL ZIRCON GEOCHRONOLOGY TO CATEGORIZE ERODED IGNEOUS UNITS: AN EXAMPLE FROM THE MESOARCHEAN BIRCH-UCHI GREENSTONE BELT, SUPERIOR PROVINCE	BA-5	BASALT	51.1	-92.6	2975	0.986586	1488.44	2.46751	49.96	0.85	4.31	14.19	0.22	15.55	12.81	0.36	0.12	0.05
Yilgarn, WESTERN AUSTRALIA	ARCHEAN BASIC VOLCANISM IN THE EASTERN GOLDFIELDS PROVINCE, YILGARN BLOCK, WESTERN AUSTRALIA	28	BASALT	-33.58	120.03	2975	0.99653	1278.01	0.982861	52.7	0.6	12.28	9.34	0.19	9.97	11.17	1.66	0.27	0.06
SW Greenland	TRACE ELEMENT SYSTEMATICS OF THE NEOARCHEAN FISKENÆSSET ANORTHOSITE COMPLEX AND ASSOCIATED META-VOLCANIC ROCKS, SW GREENLAND: EVIDENCE FOR A MAGMATIC ARC ORIGIN	497131	BASALT	63.201	-49.2789	2973	0.911378	1444.31	2.85016	46.9	1.17	16.2	12.78	0.2	8	10.1	2.9	0.2	0.09
SW Greenland	TRACE ELEMENT SYSTEMATICS OF THE NEOARCHEAN FISKENÆSSET ANORTHOSITE COMPLEX AND ASSOCIATED META-VOLCANIC ROCKS, SW GREENLAND: EVIDENCE FOR A MAGMATIC ARC ORIGIN	478864	BASALT	63.1264	-50.3014	2973	0.989454	1440.14	2.39281	49.6	1.08	14.2	13.23	0.22	7.8	9.8	2	0.4	0.08
SW Greenland	TRACE ELEMENT SYSTEMATICS OF THE NEOARCHEAN FISKENÆSSET ANORTHOSITE COMPLEX AND ASSOCIATED META-VOLCANIC ROCKS, SW GREENLAND: EVIDENCE FOR A MAGMATIC ARC ORIGIN	478857	BASALT	63.1258	-50.2969	2973	0.990024	1418.76	2.26288	48.8	0.9	14.8	12.51	0.19	8.2	11.4	1.6	0.3	0.07
SW Greenland	TRACE ELEMENT SYSTEMATICS OF THE NEOARCHEAN FISKENÆSSET ANORTHOSITE COMPLEX AND ASSOCIATED META-VOLCANIC ROCKS, SW GREENLAND: EVIDENCE FOR A MAGMATIC ARC ORIGIN	478813	BASALT	63.1283	-50.6133	2973	0.985762	1415.8	2.34891	47.4	0.65	14.5	11.79	0.17	7	15.5	1.5	0.2	0.05
SW Greenland	TRACE ELEMENT SYSTEMATICS OF THE NEOARCHEAN FISKENÆSSET ANORTHOSITE COMPLEX AND ASSOCIATED META-VOLCANIC ROCKS, SW GREENLAND: EVIDENCE FOR A MAGMATIC ARC ORIGIN	478862	BASALT	63.1261	-50.3003	2973	0.990081	1415.7	2.21361	48.7	0.97	14.9	12.42	0.2	8.3	11.3	1.5	0.2	0.08
SW Greenland	TRACE ELEMENT SYSTEMATICS OF THE NEOARCHEAN FISKENÆSSET ANORTHOSITE COMPLEX AND ASSOCIATED META-VOLCANIC ROCKS, SW GREENLAND: EVIDENCE FOR A MAGMATIC ARC ORIGIN	478811	BASALT	63.1367	-50.6175	2973	0.903792	1399.46	2.27404	47.3	0.9	15.2	11.34	0.22	6.7	15.1	1.7	0.3	0.06
SW Greenland	TRACE ELEMENT SYSTEMATICS OF THE NEOARCHEAN FISKENÆSSET ANORTHOSITE COMPLEX AND ASSOCIATED META-VOLCANIC ROCKS, SW GREENLAND: EVIDENCE FOR A MAGMATIC ARC ORIGIN	497109	BASALT	63.0234	-49.4691	2973	0.975309	1390.73	2.10824	48.4	0.73	15.9	11.61	0.19	7.8	12.1	1.9	0.1	0.05
SW Greenland	TRACE ELEMENT SYSTEMATICS OF THE NEOARCHEAN FISKENÆSSET ANORTHOSITE COMPLEX AND ASSOCIATED META-VOLCANIC ROCKS, SW GREENLAND: EVIDENCE FOR A MAGMATIC ARC ORIGIN	497124	BASALT	63.0195	-49.4662	2973	0.984773	1374.28	2.1426	47	0.77	16.1	10.62	0.26	6.8	15.1	1.8	0.4	0.06
SW Greenland	TRACE ELEMENT SYSTEMATICS OF THE NEOARCHEAN FISKENÆSSET ANORTHOSITE COMPLEX AND ASSOCIATED META-VOLCANIC ROCKS, SW GREENLAND: EVIDENCE FOR A MAGMATIC ARC ORIGIN	497142	BASALT	63.1235	-49.8218	2973	0.990945	1341.43	1.89495	48.7	0.71	15.4	10.17	0.19	7.6	12.8	2.5	0.8	0.06
SW Greenland	TRACE ELEMENT SYSTEMATICS OF THE NEOARCHEAN FISKENÆSSET ANORTHOSITE COMPLEX AND ASSOCIATED META-VOLCANIC ROCKS, SW GREENLAND: EVIDENCE FOR A MAGMATIC ARC ORIGIN	497134	BASALT	63.197	-49.2828	2973	0.995563	1340.28	1.98008	47.8	0.76	16.4	10.26	0.17	9.1	11.2	2.7	0.5	0.06
Southwest Greenland	AN OVERVIEW OF THE GEOCHEMISTRY OF EOARCHEAN TO MESOARCHEAN ULTRAMAFIC TO MAFIC VOLCANIC ROCKS, SW GREENLAND: IMPLICATIONS FOR MANTLE DEPLETION AND PETROGENETIC PROCESSES AT SUBDUCTION ZONES IN THE EARLY EARTH	508079	BASALT	63	-49.5	2970	0.934402	1463.72	2.97227	46.2	1.1	16.4	13.05	0.22	7.3	12.2	1.9	0.13	0.09
Southwest Greenland	AN OVERVIEW OF THE GEOCHEMISTRY OF EOARCHEAN TO MESOARCHEAN ULTRAMAFIC TO MAFIC VOLCANIC ROCKS, SW GREENLAND: IMPLICATIONS FOR MANTLE DEPLETION AND PETROGENETIC PROCESSES AT SUBDUCTION ZONES IN THE EARLY EARTH	508066	BASALT	63	-49.5	2970	0.98817	1456.53	2.86203	47.2	0.92	15.2	13.14	0.24	8.4	10.8	2.3	0.28	0.06
Southwest Greenland	AN OVERVIEW OF THE GEOCHEMISTRY OF EOARCHEAN TO MESOARCHEAN ULTRAMAFIC TO MAFIC VOLCANIC ROCKS, SW GREENLAND: IMPLICATIONS FOR MANTLE DEPLETION AND PETROGENETIC PROCESSES AT SUBDUCTION ZONES IN THE EARLY EARTH	508069	BASALT	63	-49.5	2970	0.916348	1436.38	2.57611	47.6	0.99	15.3	12.78	0.22	8.5	10.8	2	0.22	0.07
Southwest Greenland	AN OVERVIEW OF THE GEOCHEMISTRY OF EOARCHEAN TO MESOARCHEAN ULTRAMAFIC TO MAFIC VOLCANIC ROCKS, SW GREENLAND: IMPLICATIONS FOR MANTLE DEPLETION AND PETROGENETIC PROCESSES AT SUBDUCTION ZONES IN THE EARLY EARTH	508074	BASALT	63	-49.5	2970	0.980377	1395.03	2.31888	47.6	0.83	16.7	11.79	0.2	9	9.8	2.4	0.34	0.06
Aldan shield	SM-ND AGE AND GEOCHEMISTRY OF METAVOLCANICS FROM THE OLODINSKII GREENSTONE BELT (ALDAN SHIELD)	86226	BASALT	57.03	120.72	2966	0.937061	1423.2	2.46454	47.89	0.75	14.28	12.47	0.18	9.7	11.17	2	0.3	0.03
Aldan shield	SM-ND AGE AND GEOCHEMISTRY OF METAVOLCANICS FROM THE OLODINSKII GREENSTONE BELT (ALDAN SHIELD)	85140	BASALT	57.03	120.72	2966	0.995805	1296.16	1.41284	47.74	0.71	14.99	9.22	0.21	10.8	12.83	1.34	0.01	0.03
Eastern Transvaal, south Africa	A GEOCHEMICAL STUDY OF A PRECAMBRIAN MAFIC DYKE SWARM, EASTERN TRANSVAAL, SOUTH AFRICA	BA-10	THOLEIITE	-25.8	30.5	2965.9	0.983499	1293.15	1.23018	53.06	0.6	14.24	9.76	0.17	8.61	9.32	2.45	0.85	0.09
Superior	TWO KOMATIITIC PYROCLASTIC UNITS, SUPERIOR PROVINCE, NORTHWESTERN ONTARIO: THEIR GEOLOGY, PETROGRAPHY, AND CORRELATION	SS-528	BASALT	48.75	-93	2965.5	0.999501	1643.08	4.86236	47.7	1.3	6.5	17.82	0.3	11	12.3	0.78	0.36	0.05
Pilbara	ARCHEAN BONINITE-LIKE ROCKS IN AN INTRACRATONIC SETTING	142368	BASALT	-20.8	117.8	2965	0.966069	1251.38	0.840395	52.65	0.26	16.65	8.67	0.17	7.97	8.1	1.73	0.18	0.04
Pilbara	ARCHEAN BONINITE-LIKE ROCKS IN AN INTRACRATONIC SETTING	142360	BASALT	-20.8	117.8	2965	0.999402	1246.59	1.00344	49.21	0.17	13.44	8.48	0.17	16.06	6.1	0.63	1.16	0.03
Pilbara	ARCHEAN BONINITE-LIKE ROCKS IN AN INTRACRATONIC SETTING	142194	BASALT	-20.8	117.8	2965	0.992467	1227.46	0.732336	53.51	0.26	17.12	8.11	0.16	8.22	8.11	1.65	0.39	0.05
Pilbara	ARCHEAN BONINITE-LIKE ROCKS IN AN INTRACRATONIC SETTING	142359	BASALT	-20.8	117.8	2965	0.999463	1214.33	0.804137	52.69	0.24	17.67	7.63	0.17	8.64	7.41	2.68	0.09	0.04
Pilbara	EVIDENCE FOR EARLY LREE-ENRICHED MANTLE SOURCE REGIONS: DIVERSE MAGMAS FROM THE C. 3.0 GA MALLINA BASIN, PILBARA CRATON, NW AUSTRALIA	142-281	BASALT	-20.8	117.8	2960	0.969374	1262.94	0.912175	53.99	0.48	12.6	9.08	0.16	8.65	8.17	2.2	1.07	0.06
Uchi-Confederation, Canada	THE GEOCHEMISTRY OF REPETITIVE CYCLICAL VOLCANISM FROM BASALT THROUGH RHYOLITE IN THE UCHI-CONFEDERATION GREENSTONE BELT, CANADA	421	BASALT	51.1	-92.83	2958.6	0.916607	1359.4	1.81653	50.2	0.71	15.8	11.2	0.2	8.34	10.7	2.24	0.32	0.04
Uchi-Confederation, Canada	THE GEOCHEMISTRY OF REPETITIVE CYCLICAL VOLCANISM FROM BASALT THROUGH RHYOLITE IN THE UCHI-CONFEDERATION GREENSTONE BELT, CANADA	420	BASALT	51.1	-92.83	2958.6	0.98623	1337.64	1.71828	49.1	0.76	16.3	10.5	0.22	9.17	11.7	1.81	0.23	0.04
Superior	TRACE ELEMENT AND SM-ND SYSTEMATICS OF VOLCANIC AND INTRUSIVE ROCKS FROM THE 3 GA LUMBY LAKE GREENSTONE BELT, SUPERIOR PROVINCE; EVIDENCE FOR ARCHEAN PLUME-ARC INTERACTION	LU95-19	THOLEIITE	48	-90	2951	0.999873	1349.6	1.57047	52.69	1.18	14.57	11.01	0.2	6.27	9.52	3.2	0.05	0.09
Baltic Shield	EARLY ARCHEAN KOMATIITES OF SAAMIYA (BALTIC SHIELD)	3	THOLEIITE	64.65	30.75	2950	0.999946	1545.2	3.62011	48.22	1.2	9.49	15.52	0.27	10.6	12.42	1.41	0.39	0.17
Baltic Shield	EARLY ARCHEAN KOMATIITES OF SAAMIYA (BALTIC SHIELD)	2	BASALT	64.65	30.75	2950	0.999938	1350.57	1.72916	50.08	0.58	13.29	11.06	0.2	11.38	10.52	1.72	0.64	0.12
Superior Province	KOMATIITE-BASALT-RHYOLITE VOLCANIC ASSOCIATIONS IN NORTHERN SUPERIOR PROVINCE GREENSTONE BELTS; SIGNIFICANCE OF PLUME-ARC INTERACTION IN THE GENERATION OF THE PROTO CONTINENTAL SUPERIOR PROVINCE	NDC87-09C	BASALT	51	-93.5	2950	0.978437	1284.17	0.757453	52.98	0.22	6.91	9.63	0.21	16.31	12.05	0.35	0.25	0.02
Tipasjärvi-Kuhmo-Suomussalmi, Finland	ARCHEAN EVOLUTION OF THE TIPASJÄRVI-KUHMO-SUOMUSSALMI GREENSTONE COMPLEX, FINLAND	20SMS 60-8/198.30	basalt	65.1459	29.0719	2942	0.985048	1422.64	2.21154	46.98	0.69	9.36	12.4	0.207	16.09	6.96	0.27	1.28	0.045
Tipasjärvi-Kuhmo-Suomussalmi, Finland	ARCHEAN EVOLUTION OF THE TIPASJÄRVI-KUHMO-SUOMUSSALMI GREENSTONE COMPLEX, FINLAND	20SMS 60-1/28.50	basalt	65.1459	29.0719	2942	0.985648	1313.98	1.00665	51.06	0.53	6.71	10.16	0.191	16.79	10.9	0.47	0.05	0.013
Northern Superior Province	ALLOCHTHONOUS 2.78 GA OCEANIC PLATEAU SLIVERS IN A 2.72 GA CONTINENTAL ARC SEQUENCE; VIZIEN GREENSTONE BELT, NORTHEASTERN SUPERIOR PROVINCE, CANADA	PBA92-2008C	ANDESITE	58.08	-73	2940	0.9941	1281.62	1.26964	52.5	0.96	14.4	9.23	0.15	7.67	8.96	3.9	0.17	0.09
Northern Superior Province	ALLOCHTHONOUS 2.78 GA OCEANIC PLATEAU SLIVERS IN A 2.72 GA CONTINENTAL ARC SEQUENCE; VIZIEN GREENSTONE BELT, NORTHEASTERN SUPERIOR PROVINCE, CANADA	PBA92-2008G	BASALT	58.08	-73	2940	0.942235	1266.58	1.04216	52.4	0.52	11.9	9.12	0.18	12.1	8.88	2.7	0.06	0.04
Brazil	GEOCHEMISTRY OF METAVOLCANIC ROCKS IN THE ARCHEAN GREENSTONE BELT OF IDENTIDADE, SE PARA, BRAZIL	56B	THOLEIITE	-6.5	-49.5	2935	0.992738	1414.24	2.24359	48.99	0.9	16.06	12.44	0.2	7.68	11.25	1.65	0.28	0.2
Brazil	GEOCHEMISTRY OF METAVOLCANIC ROCKS IN THE ARCHEAN GREENSTONE BELT OF IDENTIDADE, SE PARA, BRAZIL	478	THOLEIITE	-6.5	-49.5	2935	0.951244	1409.88	2.40014	48.66	0.86	16.21	12.12	0.21	7.4	11.15	2.62	0.4	0.16
Brazil	GEOCHEMISTRY OF METAVOLCANIC ROCKS IN THE ARCHEAN GREENSTONE BELT OF IDENTIDADE, SE PARA, BRAZIL	57A	THOLEIITE	-6.5	-49.5	2935	0.998162	1407.48	2.08533	49.3	0.9	16.25	12.36	0.21	7.91	11.07	1.09	0.31	0.18
Brazil	GEOCHEMISTRY OF METAVOLCANIC ROCKS IN THE ARCHEAN GREENSTONE BELT OF IDENTIDADE, SE PARA, BRAZIL	32A	THOLEIITE	-6.5	-49.5	2935	0.996934	1404.35	2.14232	49.37	0.86	15.13	12.18	0.21	8	11.86	1.78	0.2	0.18
Brazil	GEOCHEMISTRY OF METAVOLCANIC ROCKS IN THE ARCHEAN GREENSTONE BELT OF IDENTIDADE, SE PARA, BRAZIL	9	THOLEIITE	-6.5	-49.5	2935	0.949097	1397.53	2.03904	50.12	0.83	14.79	12.15	0.21	8.02	11.31	1.87	0.31	0.18
Brazil	GEOCHEMISTRY OF METAVOLCANIC ROCKS IN THE ARCHEAN GREENSTONE BELT OF IDENTIDADE, SE PARA, BRAZIL	266B	THOLEIITE	-6.5	-49.5	2935	0.983458	1395.69	1.90914	50.5	0.8	15.07	12.15	0.23	7.83	11.45	1.35	0.21	0.18
Brazil	GEOCHEMISTRY OF METAVOLCANIC ROCKS IN THE ARCHEAN GREENSTONE BELT OF IDENTIDADE, SE PARA, BRAZIL	168	THOLEIITE	-6.5	-49.5	2935	0.998304	1355.03	1.78905	48.93	0.7	15.84	10.81	0.19	8.62	12.91	1.58	0.08	0.17
Brazil	GEOCHEMISTRY OF METAVOLCANIC ROCKS IN THE ARCHEAN GREENSTONE BELT OF IDENTIDADE, SE PARA, BRAZIL	270C	THOLEIITE	-6.5	-49.5	2935	0.997611	1348.09	1.7478	49.53	0.7	15.79	10.72	0.18	8.55	12.12	2.02	0.08	0.17
Pilbara	USE OF GEOCHEMISTRY AS A GUIDE TO PLATINUM GROUP ELEMENT POTENTIAL OF MAFIC-ULTRAMAFIC ROCKS; EXAMPLES FROM THE WEST PILBARA BLOCKS AND HALLS CREEK MOBILE ZONE, WESTERN AUSTRALIA	83330096	THOLEIITE	-21	117.1	2925	0.989497	1242.29	0.851885	53.48	0.57	14.75	8.25	0.12	6.55	8.01	1.89	1.57	0.08
Australia	GEOCHEMISTRY OF KOMATIITES FROM FORRESTANIA, SOUTHERN CROSS PROVINCE, WESTERN AUSTRALIA; EVIDENCE FOR CRUSTAL CONTAMINATION	FFD58109.25M	BASALT	-32	119	2900	0.995968	1377.94	1.89305	49.98	0.57	10.75	11.81	0.187	14.92	8.52	2.17	0.09	0.047
North Caribou terrane, Superior	MESO- AND NEOARCHEAN EVOLUTION OF THE ISLAND LAKE GREENSTONE BELT AND THE NORTHWESTERN SUPERIOR PROVINCE: EVIDENCE FROM LITHOGEOCHEMISTRY, ND ISOTOPE DATA, AND U-PB ZIRCON GEOCHRONOLOGY	52-IL-98-12	BASALT	53.8309	-94.2451	2897	0.950284	1340.23	1.66292	51.5468	0.673	14.2286	11.02	0.2633	10.3565	6.7916	3.3702	0.4712	0.0615
North Caribou terrane, Superior	MESO- AND NEOARCHEAN EVOLUTION OF THE ISLAND LAKE GREENSTONE BELT AND THE NORTHWESTERN SUPERIOR PROVINCE: EVIDENCE FROM LITHOGEOCHEMISTRY, ND ISOTOPE DATA, AND U-PB ZIRCON GEOCHRONOLOGY	102-98-812	BASALT	53.856	-94.2387	2897	0.988322	1334.36	1.58098	52.0075	0.7761	15.418	10.68	0.2038	7.2641	9.0335	2.7732	0.8382	0.0828
Northern Superior Province	CONSTRAINTS ON EARLY ARCHEAN CRUSTAL EXTRACTION AND THOLEIITIC-KOMATIITIC VOLCANISM IN GREENSTONE BELTS OF NORTHERN SUPERIOR PROVINCE	17	BASALT	59.8	-72	2878	0.980474	1349.92	1.71573	48.67	0.54	12.87	10.77	0.25	11.54	11.4	1.48	0.27	0.03
Aldan Shield	PETROLOGY AND GEOCHEMISTRY OF METAMORPHOSED KOMATIITES AND BASALTS FROM THE TUNGURCHA GREENSTONE BELT, ALDAN SHIELD	86196	BASALT	57.03	120.72	2873	0.998772	1422.3	2.33717	48	0.67	12.6	12.4	0.19	10.9	13.7	1.07	0.23	0.24
Aldan Shield	PETROLOGY AND GEOCHEMISTRY OF METAMORPHOSED KOMATIITES AND BASALTS FROM THE TUNGURCHA GREENSTONE BELT, ALDAN SHIELD	86191	BASALT	57.03	120.72	2873	0.998532	1419.98	2.12634	51.6	0.89	14.2	12.9	0.19	7.18	10.2	2.43	0.21	0.2
Aldan Shield	PETROLOGY AND GEOCHEMISTRY OF METAMORPHOSED KOMATIITES AND BASALTS FROM THE TUNGURCHA GREENSTONE BELT, ALDAN SHIELD	86197	BASALT	57.03	120.72	2873	0.999219	1387.05	1.94888	49.7	0.75	13.6	11.9	0.17	9.9	12	1.46	0.29	0.23
Aldan Shield	PETROLOGY AND GEOCHEMISTRY OF METAMORPHOSED KOMATIITES AND BASALTS FROM THE TUNGURCHA GREENSTONE BELT, ALDAN SHIELD	2494973	BASALT	57.03	120.72	2873	0.968277	1380.73	2.16316	49.4	0.91	14.9	11.5	0.18	8.23	11.1	2.17	1.38	0.23
Aldan Shield	PETROLOGY AND GEOCHEMISTRY OF METAMORPHOSED KOMATIITES AND BASALTS FROM THE TUNGURCHA GREENSTONE BELT, ALDAN SHIELD	86181	BASALT	57.03	120.72	2873	0.9459	1365.94	1.71921	50.8	0.69	14.4	11.4	0.19	8.34	12.1	1.7	0.19	0.19
NW Tanzania	GEOCHEMISTRY AND PETROGENESIS OF VOLCANIC ROCKS OF THE NEOARCHAEAN SUKUMALAND GREENSTONE BELT, NORTHWESTERN TANZANIA	R13	BASALT	-3.08	32.4	2873	0.920868	1325.22	1.58157	47.9	0.55	15.76	9.94	0.18	8.86	11.41	1.64	0.1	0.09
NW Tanzania	GEOCHEMISTRY AND PETROGENESIS OF VOLCANIC ROCKS OF THE NEOARCHAEAN SUKUMALAND GREENSTONE BELT, NORTHWESTERN TANZANIA	R78	BASALT	-3.08	32.4	2873	0.933785	1318.67	1.16996	51.4	0.82	13.67	10.36	0.15	8.7	9.9	1.19	0.09	0.09
NW Tanzania	GEOCHEMISTRY AND PETROGENESIS OF VOLCANIC ROCKS OF THE NEOARCHAEAN SUKUMALAND GREENSTONE BELT, NORTHWESTERN TANZANIA	R12	BASALT	-3.08	32.4	2873	0.942395	1316.74	1.47671	48.32	0.53	15.5	9.76	0.2	8.76	11.59	1.53	0.12	0.09
NW Tanzania	GEOCHEMISTRY AND PETROGENESIS OF VOLCANIC ROCKS OF THE NEOARCHAEAN SUKUMALAND GREENSTONE BELT, NORTHWESTERN TANZANIA	R38	ANDESITE	-3.08	32.4	2873	0.982879	1301.91	1.44167	48.85	0.71	16.1	9.11	0.24	6.54	13.6	2.06	0.17	0.07
NW Tanzania	GEOCHEMISTRY AND PETROGENESIS OF VOLCANIC ROCKS OF THE NEOARCHAEAN SUKUMALAND GREENSTONE BELT, NORTHWESTERN TANZANIA	R39	ANDESITE	-3.08	32.4	2873	0.936009	1273.04	1.30786	48.66	0.73	16.61	8.57	0.18	8.36	12.84	2.01	0.07	0.09
Belingwe	GEOCHEMISTRY OF THE IGNEOUS ROCKS OF THE BELINGWE GREENSTONE BELT: ALTERATION, CONTAMINATION AND PETROGENESIS	SL716	BASALT	-20	30	2870	0.99523	1477.16	2.75378	48.01	1.3	10.01	13.67	0.23	9.83	13.65	0.92	0.44	0.11
Belingwe	GEOCHEMISTRY OF THE IGNEOUS ROCKS OF THE BELINGWE GREENSTONE BELT: ALTERATION, CONTAMINATION AND PETROGENESIS	SL745	BASALT	-20	30	2870	0.999301	1453.29	2.82165	45.54	0.83	11.81	12.81	0.21	14.9	9.55	1.07	0.31	0.08
Belingwe	GEOCHEMISTRY OF THE IGNEOUS ROCKS OF THE BELINGWE GREENSTONE BELT: ALTERATION, CONTAMINATION AND PETROGENESIS	SL714	BASALT	-20	30	2870	0.999497	1427.49	2.27782	49.46	1.29	10.14	12.73	0.22	9.65	12.76	0.96	1.26	0.11
Belingwe	GEOCHEMISTRY OF THE IGNEOUS ROCKS OF THE BELINGWE GREENSTONE BELT: ALTERATION, CONTAMINATION AND PETROGENESIS	SL713	BASALT	-20	30	2870	0.99941	1394.94	2.01845	49.67	1.16	9.79	11.81	0.21	9.08	12.9	1.55	1.17	0.1
Belingwe	GEOCHEMISTRY OF THE IGNEOUS ROCKS OF THE BELINGWE GREENSTONE BELT: ALTERATION, CONTAMINATION AND PETROGENESIS	SL498	BASALT	-20	30	2870	0.998543	1392.95	2.02941	50.15	1	14.93	11.98	0.19	7.73	10.58	2.49	0.05	0.1
Belingwe	GEOCHEMISTRY OF THE IGNEOUS ROCKS OF THE BELINGWE GREENSTONE BELT: ALTERATION, CONTAMINATION AND PETROGENESIS	SL461	NOT-GIVEN	-20	30	2870	0.994507	1390.45	1.80825	51.32	1.12	14.77	12.05	0.18	6.87	11.69	1.58	0.07	0.11
Belingwe	GEOCHEMISTRY OF THE IGNEOUS ROCKS OF THE BELINGWE GREENSTONE BELT: ALTERATION, CONTAMINATION AND PETROGENESIS	SL526	BASALT	-20	30	2870	0.996141	1390.14	1.78672	51.75	1.22	10.39	12.08	0.2	8.78	12.47	1.99	0.17	0.11
Belingwe	GEOCHEMISTRY OF THE IGNEOUS ROCKS OF THE BELINGWE GREENSTONE BELT: ALTERATION, CONTAMINATION AND PETROGENESIS	SL702	BASALT	-20	30	2870	0.996252	1382.1	1.94187	50.9	0.87	13.04	12.01	0.2	10.59	8.66	2.94	0.11	0.09
Belingwe	GEOCHEMISTRY OF THE IGNEOUS ROCKS OF THE BELINGWE GREENSTONE BELT: ALTERATION, CONTAMINATION AND PETROGENESIS	SL403	BASALT	-20	30	2870	0.999692	1380.92	1.7041	51.3	0.82	14.83	11.92	0.18	7.78	11.93	1.16	0.09	0.08
Belingwe	GEOCHEMISTRY OF THE IGNEOUS ROCKS OF THE BELINGWE GREENSTONE BELT: ALTERATION, CONTAMINATION AND PETROGENESIS	SL719	BASALT	-20	30	2870	0.995824	1374.92	1.73773	51.35	0.7	10.59	11.9	0.19	12.98	9.25	2.15	0.11	0.08
Belingwe	GEOCHEMISTRY OF THE IGNEOUS ROCKS OF THE BELINGWE GREENSTONE BELT: ALTERATION, CONTAMINATION AND PETROGENESIS	SL720	BASALT	-20	30	2870	0.992843	1357.98	1.60689	51.12	0.68	10.17	11.43	0.18	12.98	8.87	2.29	0.11	0.08
Belingwe	GEOCHEMISTRY OF THE IGNEOUS ROCKS OF THE BELINGWE GREENSTONE BELT: ALTERATION, CONTAMINATION AND PETROGENESIS	SL715	BASALT	-20	30	2870	0.998838	1353.17	1.61754	52.04	1.18	9.8	11.11	0.2	9.14	12.2	1.77	1.41	0.1
Belingwe	GEOCHEMISTRY OF THE IGNEOUS ROCKS OF THE BELINGWE GREENSTONE BELT: ALTERATION, CONTAMINATION AND PETROGENESIS	SL785	BASALT	-20	30	2870	0.998961	1343.59	1.47527	52.78	0.7	10.63	11.21	0.18	11.07	9.55	2.63	0.26	0.08
Belingwe	GEOCHEMISTRY OF THE IGNEOUS ROCKS OF THE BELINGWE GREENSTONE BELT: ALTERATION, CONTAMINATION AND PETROGENESIS	SL740	BASALT	-20	30	2870	0.997811	1342.34	1.45342	53.15	0.73	11.1	11.19	0.17	10.44	9.4	2.8	0.17	0.08
Belingwe	GEOCHEMISTRY OF THE IGNEOUS ROCKS OF THE BELINGWE GREENSTONE BELT: ALTERATION, CONTAMINATION AND PETROGENESIS	SL737	BASALT	-20	30	2870	0.99893	1334.36	1.27084	53.56	0.79	14.25	10.98	0.17	8.17	10.98	1.46	0.1	0.07
Belingwe	GEOCHEMISTRY OF THE IGNEOUS ROCKS OF THE BELINGWE GREENSTONE BELT: ALTERATION, CONTAMINATION AND PETROGENESIS	SL734	BASALT	-20	30	2870	0.999703	1331.71	1.27903	53.58	0.78	14.2	10.92	0.17	8.26	10.59	1.7	0.12	0.07
Belingwe	GEOCHEMISTRY OF THE IGNEOUS ROCKS OF THE BELINGWE GREENSTONE BELT: ALTERATION, CONTAMINATION AND PETROGENESIS	SL736	BASALT	-20	30	2870	0.998102	1330.47	1.33743	52.82	0.79	14.23	10.8	0.16	8.21	9.89	2.18	0.04	0.07
Belingwe	GEOCHEMISTRY OF THE IGNEOUS ROCKS OF THE BELINGWE GREENSTONE BELT: ALTERATION, CONTAMINATION AND PETROGENESIS	NG777	BASALT	-20	30	2870	0.999935	1326.37	1.19429	52.46	0.72	14.58	10.7	0.19	8.52	10.49	1.01	0.05	0.05
Belingwe	GEOCHEMISTRY OF THE IGNEOUS ROCKS OF THE BELINGWE GREENSTONE BELT: ALTERATION, CONTAMINATION AND PETROGENESIS	NG771	BASALT	-20	30	2870	0.999935	1324.88	1.16142	52.74	0.61	14.6	10.8	0.17	9.28	9.41	1.02	0.06	0.05
Belingwe	GEOCHEMISTRY OF THE IGNEOUS ROCKS OF THE BELINGWE GREENSTONE BELT: ALTERATION, CONTAMINATION AND PETROGENESIS	SL782	BASALT	-20	30	2870	0.999559	1322.52	1.35417	52.18	0.52	10.15	10.66	0.17	14.13	9.02	2.43	0	0.06
Belingwe	GEOCHEMISTRY OF THE IGNEOUS ROCKS OF THE BELINGWE GREENSTONE BELT: ALTERATION, CONTAMINATION AND PETROGENESIS	NG775	BASALT	-20	30	2870	0.999935	1321.56	1.18297	52.16	0.7	14.23	10.51	0.18	8.66	11.25	1	0.03	0.06
Belingwe	GEOCHEMISTRY OF THE IGNEOUS ROCKS OF THE BELINGWE GREENSTONE BELT: ALTERATION, CONTAMINATION AND PETROGENESIS	SL780	BASALT	-20	30	2870	0.998022	1321.37	1.29868	52.55	0.51	10.03	10.66	0.17	14.2	8.97	2.28	0	0.06
Belingwe	GEOCHEMISTRY OF THE IGNEOUS ROCKS OF THE BELINGWE GREENSTONE BELT: ALTERATION, CONTAMINATION AND PETROGENESIS	NG776	BASALT	-20	30	2870	0.999935	1318.75	1.12326	52.77	0.71	14.35	10.52	0.17	8.49	10.7	0.99	0.04	0.05
Belingwe	GEOCHEMISTRY OF THE IGNEOUS ROCKS OF THE BELINGWE GREENSTONE BELT: ALTERATION, CONTAMINATION AND PETROGENESIS	NG780	BASALT	-20	30	2870	0.999935	1318.38	1.05094	53.18	0.49	11.8	10.85	0.18	13.55	7.6	1.02	0.02	0.04
Belingwe	GEOCHEMISTRY OF THE IGNEOUS ROCKS OF THE BELINGWE GREENSTONE BELT: ALTERATION, CONTAMINATION AND PETROGENESIS	SL752	BASALT	-20	30	2870	0.999205	1310.36	1.21399	52.55	0.49	9.64	10.4	0.16	15.55	8.06	2.22	0	0.06
Belingwe	GEOCHEMISTRY OF THE IGNEOUS ROCKS OF THE BELINGWE GREENSTONE BELT: ALTERATION, CONTAMINATION AND PETROGENESIS	NG772	BASALT	-20	30	2870	0.999935	1305.72	1.01649	53.25	0.56	13.73	10.24	0.18	9.22	10.53	1.01	0.05	0.05
Belingwe	GEOCHEMISTRY OF THE IGNEOUS ROCKS OF THE BELINGWE GREENSTONE BELT: ALTERATION, CONTAMINATION AND PETROGENESIS	SL781	BASALT	-20	30	2870	0.998254	1302.44	1.19057	52.86	0.53	10.49	10.16	0.15	13.12	9.49	2.47	0	0.06
Belingwe	GEOCHEMISTRY OF THE IGNEOUS ROCKS OF THE BELINGWE GREENSTONE BELT: ALTERATION, CONTAMINATION AND PETROGENESIS	SL499	NOT-GIVEN	-20	30	2870	0.999292	1283.73	1.00963	53.22	0.81	14.07	9.43	0.14	7.69	10.53	1.92	0.2	0.1
Belingwe	GEOCHEMISTRY OF THE IGNEOUS ROCKS OF THE BELINGWE GREENSTONE BELT: ALTERATION, CONTAMINATION AND PETROGENESIS	SL776	BASALT	-20	30	2870	0.999987	1277.99	0.941995	53.61	0.45	8.46	9.56	0.16	14.98	9.21	2.26	0	0.05
Fortaleza de Minas region	PETROLOGY OF ULTRABASIC AND BASIC LAVAS OF THE VOLCANO-SEDIMENTARY MORRO DO FERRO SEQUENCE, FORTALEZA DE MINAS (MG)	7	BASALT	-20.5	-46.5	2860	0.99993	1373.83	2.05499	48.5	0.85	13.4	11.43	0.18	11.5	7.7	3.17	0.09	0.1
North Caribou terrane, Superior	MESO- AND NEOARCHEAN EVOLUTION OF THE ISLAND LAKE GREENSTONE BELT AND THE NORTHWESTERN SUPERIOR PROVINCE: EVIDENCE FROM LITHOGEOCHEMISTRY, ND ISOTOPE DATA, AND U-PB ZIRCON GEOCHRONOLOGY	52-IL-98-38	BASALT	53.9045	-94.7281	2852	0.911768	1296.07	1.02762	53.9821	0.6217	11.9412	9.78	0.2107	7.9231	12.229	1.9217	0.2466	0.0617
Baltic Shield	OCEANIC PLATEAU MODEL FOR CONTINENTAL CRUSTAL GROWTH IN THE ARCHAEAN; A CASE STUDY FROM THE KOSTOMUKSHA GREENSTONE BELT, NW BALTIC SHIELD	9444	THOLEIITE	64.65	30.75	2843.5	0.954496	1426.94	2.2325	51.1	1.16	14.1	13.05	0.19	7.02	8.67	2.67	0.56	0.09
Baltic Shield	EARLY MAGMATISM OF THE BELOMORIAN MOBILE BELT, BALTIC SHIELD: LATERAL ZONING AND ISOTOPIC AGE	311-9	BASALT	66.25	33.75	2835	0.993651	1553.18	3.74422	46.6	1.03	14.51	15.47	0.52	7.06	11.43	1.04	0.23
Baltic Shield	EARLY MAGMATISM OF THE BELOMORIAN MOBILE BELT, BALTIC SHIELD: LATERAL ZONING AND ISOTOPIC AGE	450-2	BASALT	66.25	33.75	2835	0.979246	1477.47	2.86854	48.8	0.98	15.14	14.02	0.14	7.05	8.54	2.81	0.28	0.1
Baltic Shield	EARLY MAGMATISM OF THE BELOMORIAN MOBILE BELT, BALTIC SHIELD: LATERAL ZONING AND ISOTOPIC AGE	450-1	BASALT	66.25	33.75	2835	0.998893	1442.77	2.48634	48.8	1.04	15.77	13.09	0.19	6.96	9.45	2.25	0.23	0.17
Jharol Belt, India	GEOCHEMISTRY AND PETROGENESIS OF LATE ARCHAEAN ARAVALLI VOLCANICS, BASEMENT ENCLAVES AND GRANITOIDS, RAJASTHAN	BE.3	NOT-GIVEN	24.93	73.82	2830	0.99232	1316.8	1.43458	50.8	0.68	14.5	10.18	0.2	9.4	11.04	1.77	0.53	0.06
Northern Superior Province	CONSTRAINTS ON EARLY ARCHEAN CRUSTAL EXTRACTION AND THOLEIITIC-KOMATIITIC VOLCANISM IN GREENSTONE BELTS OF NORTHERN SUPERIOR PROVINCE	34	BASALT	60.8	-71	2820	0.97016	1483.97	2.88247	49.33	0.46	12.6	14.17	0.28	8.05	10.23	2.58	0.27	0.01
Northern Superior Province	CONSTRAINTS ON EARLY ARCHEAN CRUSTAL EXTRACTION AND THOLEIITIC-KOMATIITIC VOLCANISM IN GREENSTONE BELTS OF NORTHERN SUPERIOR PROVINCE	23	BASALT	60.8	-71	2820	0.996732	1346.28	2.19243	46.12	0.51	16.61	10.23	0.19	10	9.36	1.34	2.58	0.04
Karelian, Finland	GEOCHEMISTRY OF KOMATIITES FROM THE TIPASJÄRVI, KUHMO, SUOMUSSALMI, ILOMANTSI AND TULPPIO GREENSTONE BELTS, FINLAND: IMPLICATIONS FOR TECTONIC SETTING AND NI SULPHIDE PROSPECTIVITY	12-PTP-03	BASALT	64.24	29.1	2815	0.916119	1374.62	2.01988	45.3	0.54	10.6	10.81	0.195	15.8	10.04	0.78	0.299	0.035
Karelian, Finland	GEOCHEMISTRY OF KOMATIITES FROM THE TIPASJÄRVI, KUHMO, SUOMUSSALMI, ILOMANTSI AND TULPPIO GREENSTONE BELTS, FINLAND: IMPLICATIONS FOR TECTONIC SETTING AND NI SULPHIDE PROSPECTIVITY	HJO-87-79.1	BASALT	62.7	30.9	2815	0.95133	1350.43	1.64516	50.2	0.5412	9.41	11.06	0.2024	13.7	7.615	2.65	0.402	0.1648
Karelian, Finland	GEOCHEMISTRY OF KOMATIITES FROM THE TIPASJÄRVI, KUHMO, SUOMUSSALMI, ILOMANTSI AND TULPPIO GREENSTONE BELTS, FINLAND: IMPLICATIONS FOR TECTONIC SETTING AND NI SULPHIDE PROSPECTIVITY	75-PTP-03	BASALT	65.2	29.1	2815	0.937338	1227.99	1.00318	49.8	0.72	16.1	7.77	0.146	9.8	7.51	2.86	0.053	0.05
Karelian, Finland	GEOCHEMISTRY OF KOMATIITES FROM THE TIPASJÄRVI, KUHMO, SUOMUSSALMI, ILOMANTSI AND TULPPIO GREENSTONE BELTS, FINLAND: IMPLICATIONS FOR TECTONIC SETTING AND NI SULPHIDE PROSPECTIVITY	25-PTP-03	BASALT	64.27	29.05	2815	0.969899	1173.89	0.780222	51.1	0.367	14.8	6.25	0.155	11.2	10.93	2.16	0.981	0.018
Tanzania Craton	DATING BASALTIC VOLCANISM IN THE NEOARCHAEAN SUKUMALAND GREENSTONE BELT OF THE TANZANIA CRATON USING THE SM-ND METHOD: IMPLICATIONS FOR THE GEOLOGICAL EVOLUTION OF THE TANZANIA CRATON	R10	BASALT	-3.08	32.4	2813	0.99978	1484.4	3.06582	47.6	1.32	14.8	13.68	0.26	6.53	11.6	2.36	0.17	0.12
Tanzania Craton	DATING BASALTIC VOLCANISM IN THE NEOARCHAEAN SUKUMALAND GREENSTONE BELT OF THE TANZANIA CRATON USING THE SM-ND METHOD: IMPLICATIONS FOR THE GEOLOGICAL EVOLUTION OF THE TANZANIA CRATON	R11	BASALT	-3.08	32.4	2813	0.999938	1390.14	2.0912	49.7	1.11	14.6	11.7	0.18	7.01	11.2	2.81	0.21	0.12
Tanzania Craton	DATING BASALTIC VOLCANISM IN THE NEOARCHAEAN SUKUMALAND GREENSTONE BELT OF THE TANZANIA CRATON USING THE SM-ND METHOD: IMPLICATIONS FOR THE GEOLOGICAL EVOLUTION OF THE TANZANIA CRATON	R41	BASALT	-3.08	32.4	2813	0.99993	1381.27	2.24263	48.9	1	16	11.43	0.23	7.62	9.5	3.16	0.92	0.09
Tanzania Craton	DATING BASALTIC VOLCANISM IN THE NEOARCHAEAN SUKUMALAND GREENSTONE BELT OF THE TANZANIA CRATON USING THE SM-ND METHOD: IMPLICATIONS FOR THE GEOLOGICAL EVOLUTION OF THE TANZANIA CRATON	R13	BASALT	-3.08	32.4	2813	0.99993	1325.15	1.56776	49.1	0.56	16.2	10.17	0.18	9.09	11.7	1.68	0.1	0.09
Tanzania Craton	DATING BASALTIC VOLCANISM IN THE NEOARCHAEAN SUKUMALAND GREENSTONE BELT OF THE TANZANIA CRATON USING THE SM-ND METHOD: IMPLICATIONS FOR THE GEOLOGICAL EVOLUTION OF THE TANZANIA CRATON	R38	BASALT	-3.08	32.4	2813	0.999935	1302.9	1.44135	49.6	0.72	16.4	9.27	0.24	6.64	13.8	2.09	0.17	0.07
Tanzania Craton	DATING BASALTIC VOLCANISM IN THE NEOARCHAEAN SUKUMALAND GREENSTONE BELT OF THE TANZANIA CRATON USING THE SM-ND METHOD: IMPLICATIONS FOR THE GEOLOGICAL EVOLUTION OF THE TANZANIA CRATON	R39	BASALT	-3.08	32.4	2813	0.99993	1273.91	1.31159	49.1	0.74	16.8	8.65	0.18	8.44	13	2.03	0.07	0.09
Dharwar, SOUTHERN INDIA	AN ARCHAEAN TECTONIC MODEL OF THE DHARWAR CRATON, SOUTHERN INDIA: THE ORIGIN OF THE HOLENARASIPUR GREENSTONE BELT (HUSSAN DISTRICT, KARNATAKA) AND REINTERPRETATION OF THE SARGUR-DHARWAR RELATIONSHIP	69	BASALT	12.77	76.23	2800	0.999355	1418.56	2.22912	50.5	1.19	14.6	12.63	0.203	6.93	9.39	2.86	0.26	0.082
Finland	KOMATIITE GEOLOGY OF THE SIIVIKKOVAARA AND KELLOJÄRVI AREAS OF THE KUHMO GREENSTONE BELT	3	BASALT	64.2486	29.0733	2800	0.999935	1350.27	1.60229	50	0.45	10.2	11	0.25	14.8	11.6	1.16	0.25	0.04
Kaapvaal	FUNDAMENTAL UNIFORMITY IN THE TRACE ELEMENT PATTERNS OF THE VOLCANICS OF THE KAAPVAAL CRATON FROM 3000 TO 2100 MA: EVIDENCE FOR THE LITHOSPHERIC ORIGIN OF THESE CONTINENTAL THOLEIITES	DB-93	basalt	-25.87	24.73	2800	0.976121	1348.48	1.61484	51.7	0.76	13.06	11.12	0.18	9.15	9.54	2.5	0.57	0.17
Finland	KOMATIITE GEOLOGY OF THE SIIVIKKOVAARA AND KELLOJÄRVI AREAS OF THE KUHMO GREENSTONE BELT	2	BASALT	64.2486	29.0733	2800	0.999935	1334.96	1.39323	53.6	0.71	13.5	10.8	0.24	7.19	10.6	2.69	0.19	0.05
Uchi-Confederation, Canada	THE GEOCHEMISTRY OF REPETITIVE CYCLICAL VOLCANISM FROM BASALT THROUGH RHYOLITE IN THE UCHI-CONFEDERATION GREENSTONE BELT, CANADA	407	BASALT	51.1	-92.82	2794	0.944987	1399.81	2.00011	49.4	1.07	15.7	12.2	0.22	8.3	11.7	1.15	0	0.05
Yilgarn	LONG-LIVED, AUTOCHTHONOUS DEVELOPMENT OF THE ARCHEAN MURCHISON DOMAIN, AND IMPLICATIONS FOR YILGARN CRATON TECTONICS	81449	BASALT	-26.5	118.3	2792	0.997417	1245.89	0.840335	50	0.4	10.8	8.39	0.19	14.9	9.21	1.15	0.06	0.08
Finland	KOMATIITE GEOLOGY OF THE SIIVIKKOVAARA AND KELLOJÄRVI AREAS OF THE KUHMO GREENSTONE BELT	1	BASALT	64.2329	29.0882	2790	0.999853	1362.31	1.74752	50.21	0.71	16.5	11.14	0.19	7.29	12.06	1.56	0.228	0.07
Tipasjärvi-Kuhmo-Suomussalmi, Finland	ARCHEAN EVOLUTION OF THE TIPASJÄRVI-KUHMO-SUOMUSSALMI GREENSTONE COMPLEX, FINLAND	35R 0-1/50.20	BASALT	64.4474	29.0532	2788	0.999935	1612.77	4.95318	45.08	0.71	11.37	20.2	0.56	7.13	9.94	1.85	1.12
Tipasjärvi-Kuhmo-Suomussalmi, Finland	ARCHEAN EVOLUTION OF THE TIPASJÄRVI-KUHMO-SUOMUSSALMI GREENSTONE COMPLEX, FINLAND	39R 0-1/21.80	BASALT	64.4415	29.0478	2788	0.999935	1533.69	3.27415	51.41	0.56	8.96	15.92	0.35	8.95	9.06	3.42	0.09
Tipasjärvi-Kuhmo-Suomussalmi, Finland	ARCHEAN EVOLUTION OF THE TIPASJÄRVI-KUHMO-SUOMUSSALMI GREENSTONE COMPLEX, FINLAND	17R 0-1/5.03	BASALT	64.4451	29.0485	2788	0.999862	1499.27	2.71899	50.53	0.82	13.04	14.95	0.53	7.3	8.47	1.75	0.18
Tipasjärvi-Kuhmo-Suomussalmi, Finland	ARCHEAN EVOLUTION OF THE TIPASJÄRVI-KUHMO-SUOMUSSALMI GREENSTONE COMPLEX, FINLAND	20R 0-1/13.04	BASALT	64.446	29.0484	2788	0.999935	1462.03	2.5197	50.51	0.56	13.39	14.13	0.45	8.95	9.12	0.94	1.45
Tipasjärvi-Kuhmo-Suomussalmi, Finland	ARCHEAN EVOLUTION OF THE TIPASJÄRVI-KUHMO-SUOMUSSALMI GREENSTONE COMPLEX, FINLAND	4SII 93-1/60.4	BASALT	64.244	29.0751	2788	0.979291	1459.37	2.86528	45	0.739	13.1	13	0.22	12.5	7.56	1.89	0.143	0.046
Tipasjärvi-Kuhmo-Suomussalmi, Finland	ARCHEAN EVOLUTION OF THE TIPASJÄRVI-KUHMO-SUOMUSSALMI GREENSTONE COMPLEX, FINLAND	37R 0-3/98.47	basalt	64.4465	29.0517	2788	0.999935	1305.65	1.01235	51.95	0.75	13.3	9.83	0.28	6.55	7.93	1.86	0.09
Karelian	KALIKORVA STRUCTURE AND ITS POSITION IN THE SYSTEM OF THE NORTHERN KARELIAN GREENSTONE BELTS: GEOCHEMICAL AND GEOCHRONOLOGICAL DATA	58/4A	BASALT	66.78	32	2785	0.994567	1440.87	2.5374	48.02	0.94	14.31	12.96	0.22	8.72	11.32	1.74	0.24	0.07
Karelian	KALIKORVA STRUCTURE AND ITS POSITION IN THE SYSTEM OF THE NORTHERN KARELIAN GREENSTONE BELTS: GEOCHEMICAL AND GEOCHRONOLOGICAL DATA	58/4B	BASALT	66.78	32	2785	0.995562	1413.21	2.28949	47.54	0.51	11.45	12.19	0.23	15.1	10.3	1.1	0.21	0
Karelian	KALIKORVA STRUCTURE AND ITS POSITION IN THE SYSTEM OF THE NORTHERN KARELIAN GREENSTONE BELTS: GEOCHEMICAL AND GEOCHRONOLOGICAL DATA	27061	BASALT	66.78	32	2785	0.993959	1411.94	2.28653	48.94	0.93	15.11	12.47	0.17	8.97	9.27	2.51	0.18	0.07
Karelian	KALIKORVA STRUCTURE AND ITS POSITION IN THE SYSTEM OF THE NORTHERN KARELIAN GREENSTONE BELTS: GEOCHEMICAL AND GEOCHRONOLOGICAL DATA	35/12A	BASALT	66.78	32	2785	0.959567	1396.3	2.4269	45.9	0.74	12.2	11.11	0.22	11.63	14.62	1.25	0.89	0.2
Karelian	KALIKORVA STRUCTURE AND ITS POSITION IN THE SYSTEM OF THE NORTHERN KARELIAN GREENSTONE BELTS: GEOCHEMICAL AND GEOCHRONOLOGICAL DATA	35/12B	BASALT	66.78	32	2785	0.999769	1393	2.35514	46.21	0.75	11.7	11.37	0.22	15.97	10.6	1.09	0.62	0.2
Karelian	KALIKORVA STRUCTURE AND ITS POSITION IN THE SYSTEM OF THE NORTHERN KARELIAN GREENSTONE BELTS: GEOCHEMICAL AND GEOCHRONOLOGICAL DATA	21916	BASALT	66.78	32	2785	0.999806	1372.68	2.01818	48.33	0.75	13.09	11.26	0.24	11.19	11.26	1.3	1.08	0.24
Yilgarn	KOMATIITES OF THE WILDARA-LEONORA BELT, YILGARN CRATON, WA: THE MISSING LINK IN THE KALGOORLIE TERRANE?	WD103-193.4	basalt	-28.5	121.5	2785	0.950906	1315.44	1.47924	52.43	0.61	13.56	10.35	0.16	9.68	8.27	3.81	0.16	0.04
Northern Karelia	HIGH-MG, LOW-TI QUARTZ AMPHIBOLITES OF GREENSTONE BELTS FROM NORTHERN KARELIA - METAMORPHOSED ARCHEAN ANALOGUES OF BONINITES?	N-333	BASALT	66.25	33.75	2778	0.977729	1394.41	1.98999	47.13	0.41	10.08	11.64	0.18	16.59	10.48	0.49	0.06	0.05
Finland	KOMATIITE GEOLOGY OF THE SIIVIKKOVAARA AND KELLOJÄRVI AREAS OF THE KUHMO GREENSTONE BELT	8	BASALT	64.2362	29.1042	2775	0.999935	1524.91	3.65954	45.8	0.72	13	14.7	0.23	14.6	9.41	1.2	0.1
Finland	KOMATIITE GEOLOGY OF THE SIIVIKKOVAARA AND KELLOJÄRVI AREAS OF THE KUHMO GREENSTONE BELT	4	BASALT	64.2362	29.1042	2775	0.999935	1335.42	1.58201	51.6	0.57	11.7	11	0.19	14.4	7.31	2.96	0.07
Finland	KOMATIITE GEOLOGY OF THE SIIVIKKOVAARA AND KELLOJÄRVI AREAS OF THE KUHMO GREENSTONE BELT	5	BASALT	64.2362	29.1042	2775	0.999935	1334.61	1.63931	50.6	0.57	11.7	10.8	0.19	15.7	7.51	2.65	0.05
Superior	GEOCHEMISTRY OF BONINITE-TYPE VOLCANIC ROCKS IN THE FROTET-EVANS GREENSTONE BELT, OPATICA SUBPROVINCE, QUEBEC: IMPLICATIONS FOR THE EVOLUTION OF ARCHEAN GREENSTONE BELTS	82-27-13	BASALT	51	-74	2774	0.99977	1353.66	1.58123	51	0.38	13.6	11.34	0	11.6	10.4	1.6	0	0.02
Superior	GEOCHEMISTRY OF BONINITE-TYPE VOLCANIC ROCKS IN THE FROTET-EVANS GREENSTONE BELT, OPATICA SUBPROVINCE, QUEBEC: IMPLICATIONS FOR THE EVOLUTION OF ARCHEAN GREENSTONE BELTS	135643IC	ANDESITE	51	-74	2774	0.995293	1323.79	1.25238	52.2	0.36	13.7	10.6	0.2	9.3	9.7	1.7	0.1	0.01
Superior	GEOCHEMISTRY OF BONINITE-TYPE VOLCANIC ROCKS IN THE FROTET-EVANS GREENSTONE BELT, OPATICA SUBPROVINCE, QUEBEC: IMPLICATIONS FOR THE EVOLUTION OF ARCHEAN GREENSTONE BELTS	92-6532	THOLEIITE	51	-74	2774	0.997307	1321.46	1.64369	46.6	0.62	15.3	9.81	0.2	10.5	11.1	0.2	1.5	0.05
Superior	GEOCHEMISTRY OF BONINITE-TYPE VOLCANIC ROCKS IN THE FROTET-EVANS GREENSTONE BELT, OPATICA SUBPROVINCE, QUEBEC: IMPLICATIONS FOR THE EVOLUTION OF ARCHEAN GREENSTONE BELTS	135587IC	BASALT	51	-74	2774	0.977552	1312.21	1.36322	49.5	0.37	13.7	10.2	0.2	13	6.1	1.5	0.8	0.1
Superior	GEOCHEMISTRY OF BONINITE-TYPE VOLCANIC ROCKS IN THE FROTET-EVANS GREENSTONE BELT, OPATICA SUBPROVINCE, QUEBEC: IMPLICATIONS FOR THE EVOLUTION OF ARCHEAN GREENSTONE BELTS	96-11333	BASALT	51	-74	2774	0.999534	1293.89	1.09766	52.4	0.46	14.9	9.81	0.2	8.7	10	1.7	0.1	0.04
Superior	GEOCHEMISTRY OF BONINITE-TYPE VOLCANIC ROCKS IN THE FROTET-EVANS GREENSTONE BELT, OPATICA SUBPROVINCE, QUEBEC: IMPLICATIONS FOR THE EVOLUTION OF ARCHEAN GREENSTONE BELTS	135685IC	BASALT	51	-74	2774	0.995637	1290.24	1.12415	51.3	0.37	13.6	9.7	0.2	11.3	8.2	1.9	0.1	0.01
Superior	GEOCHEMISTRY OF BONINITE-TYPE VOLCANIC ROCKS IN THE FROTET-EVANS GREENSTONE BELT, OPATICA SUBPROVINCE, QUEBEC: IMPLICATIONS FOR THE EVOLUTION OF ARCHEAN GREENSTONE BELTS	96-12037	BASALT	51	-74	2774	0.998351	1283.65	1.17393	51.4	0.45	15.3	9.45	0.2	8.9	8.3	1.1	1.7	0.03
Superior	GEOCHEMISTRY OF BONINITE-TYPE VOLCANIC ROCKS IN THE FROTET-EVANS GREENSTONE BELT, OPATICA SUBPROVINCE, QUEBEC: IMPLICATIONS FOR THE EVOLUTION OF ARCHEAN GREENSTONE BELTS	133731IC	BASALT	51	-74	2774	0.949731	1275.47	1.11114	49	0.44	14.5	8.6	0.2	7	10.7	1.8	0.3	0.09
Superior	GEOCHEMISTRY OF BONINITE-TYPE VOLCANIC ROCKS IN THE FROTET-EVANS GREENSTONE BELT, OPATICA SUBPROVINCE, QUEBEC: IMPLICATIONS FOR THE EVOLUTION OF ARCHEAN GREENSTONE BELTS	94-1359	THOLEIITE	51	-74	2774	0.995178	1272.96	1.18409	48.4	0.6	14	8.91	0.2	11.8	8.8	0.2	1.7	0
Superior	GEOCHEMISTRY OF BONINITE-TYPE VOLCANIC ROCKS IN THE FROTET-EVANS GREENSTONE BELT, OPATICA SUBPROVINCE, QUEBEC: IMPLICATIONS FOR THE EVOLUTION OF ARCHEAN GREENSTONE BELTS	97-14477	BASALT	51	-74	2774	0.996862	1272.91	0.979046	52.6	0.44	13.6	9.27	0.2	9.8	9.1	1.7	0.5	0.03
Superior	GEOCHEMISTRY OF BONINITE-TYPE VOLCANIC ROCKS IN THE FROTET-EVANS GREENSTONE BELT, OPATICA SUBPROVINCE, QUEBEC: IMPLICATIONS FOR THE EVOLUTION OF ARCHEAN GREENSTONE BELTS	96-12067	BASALT	51	-74	2774	0.990537	1260.44	1.15201	52.4	0.76	13.6	8.73	0.2	8.4	8.5	3.1	1.2	0.3
Superior	GEOCHEMISTRY OF BONINITE-TYPE VOLCANIC ROCKS IN THE FROTET-EVANS GREENSTONE BELT, OPATICA SUBPROVINCE, QUEBEC: IMPLICATIONS FOR THE EVOLUTION OF ARCHEAN GREENSTONE BELTS	11	BASALT	51	-74	2774	0.997517	1257.06	1.02502	51.4	0.38	13.4	8.64	0	10.2	10.8	2.5	0	0.04
Superior	GEOCHEMISTRY OF BONINITE-TYPE VOLCANIC ROCKS IN THE FROTET-EVANS GREENSTONE BELT, OPATICA SUBPROVINCE, QUEBEC: IMPLICATIONS FOR THE EVOLUTION OF ARCHEAN GREENSTONE BELTS	93-16157	BASALT	51	-74	2774	0.998096	1252.16	0.879747	51.8	0.47	14.4	8.64	0.2	9.9	9.9	0.9	0.8	0.02
Superior	GEOCHEMISTRY OF BONINITE-TYPE VOLCANIC ROCKS IN THE FROTET-EVANS GREENSTONE BELT, OPATICA SUBPROVINCE, QUEBEC: IMPLICATIONS FOR THE EVOLUTION OF ARCHEAN GREENSTONE BELTS	96-12039	BASALT	51	-74	2774	0.998667	1233.5	0.787329	52.6	0.45	16.5	8.01	0.2	7.3	10.7	1.2	0.6	0.04
Superior	GEOCHEMISTRY OF BONINITE-TYPE VOLCANIC ROCKS IN THE FROTET-EVANS GREENSTONE BELT, OPATICA SUBPROVINCE, QUEBEC: IMPLICATIONS FOR THE EVOLUTION OF ARCHEAN GREENSTONE BELTS	85-16787	BASALT	51	-74	2774	0.999622	1222.27	0.908631	51.3	0.43	15.5	7.65	0.2	9.3	9.7	1.6	1.2	0.05
Superior	GEOCHEMISTRY OF BONINITE-TYPE VOLCANIC ROCKS IN THE FROTET-EVANS GREENSTONE BELT, OPATICA SUBPROVINCE, QUEBEC: IMPLICATIONS FOR THE EVOLUTION OF ARCHEAN GREENSTONE BELTS	93-12559	ANDESITE	51	-74	2774	0.955459	1204.95	0.633601	53.1	0.42	14.4	7.38	0.2	9.8	11.1	1.7	0.1	0.02
Superior	GEOCHEMISTRY OF BONINITE-TYPE VOLCANIC ROCKS IN THE FROTET-EVANS GREENSTONE BELT, OPATICA SUBPROVINCE, QUEBEC: IMPLICATIONS FOR THE EVOLUTION OF ARCHEAN GREENSTONE BELTS	85-16786	ANDESITE	51	-74	2774	0.999827	1182.04	0.575162	53.9	0.57	16.1	6.66	0.1	7.6	9.1	1.8	0.9	0.07
Tipasjärvi-Kuhmo-Suomussalmi, Finland	ARCHEAN EVOLUTION OF THE TIPASJÄRVI-KUHMO-SUOMUSSALMI GREENSTONE COMPLEX, FINLAND	2ARO 93-2/225.00	BASALT	64.4465	29.0465	2770	0.975936	1414.58	1.95204	49.39	0.68	14.13	12.27	0.334	6.08	8.29	1.94	0.16	0.038
Tipasjärvi-Kuhmo-Suomussalmi, Finland	ARCHEAN EVOLUTION OF THE TIPASJÄRVI-KUHMO-SUOMUSSALMI GREENSTONE COMPLEX, FINLAND	195TOH 93-1	BASALT	64.2465	29.0605	2770	0.943734	1369.26	1.76279	47.8	0.51	10.23	11.09	0.245	13.59	11.64	0.96	0.13	0.032
Tipasjärvi-Kuhmo-Suomussalmi, Finland	ARCHEAN EVOLUTION OF THE TIPASJÄRVI-KUHMO-SUOMUSSALMI GREENSTONE COMPLEX, FINLAND	174TOH 93-1	BASALT	64.2389	29.087	2770	0.965338	1311.46	1.40616	51.1	0.68	14.5	9.97	0.231	8.6	11.77	2.23	0.23	0.044
Yilgarn	LONG-LIVED, AUTOCHTHONOUS DEVELOPMENT OF THE ARCHEAN MURCHISON DOMAIN, AND IMPLICATIONS FOR YILGARN CRATON TECTONICS	81511	BASALT	-26.5	118.3	2769.5	0.982246	1362.28	1.52317	48.6	0.56	10.2	11.26	0.18	14.5	8.14	0.72	0.17	0.08
Yilgarn	LONG-LIVED, AUTOCHTHONOUS DEVELOPMENT OF THE ARCHEAN MURCHISON DOMAIN, AND IMPLICATIONS FOR YILGARN CRATON TECTONICS	190551	BASALT	-26.5	118.3	2769.5	0.998178	1360.53	1.65567	48.81	0.829	14.167	10.79	0.187	7.136	13.215	1.198	0.117	0.077
Yilgarn	LONG-LIVED, AUTOCHTHONOUS DEVELOPMENT OF THE ARCHEAN MURCHISON DOMAIN, AND IMPLICATIONS FOR YILGARN CRATON TECTONICS	81517	BASALT	-26.5	118.3	2769.5	0.99707	1281.57	1.00969	50.2	0.42	10.7	9.37	0.16	14.5	8.31	1.18	0.16	0.07
Yilgarn	LONG-LIVED, AUTOCHTHONOUS DEVELOPMENT OF THE ARCHEAN MURCHISON DOMAIN, AND IMPLICATIONS FOR YILGARN CRATON TECTONICS	81524	BASALT	-26.5	118.3	2769.5	0.996612	1271.39	0.838265	51.2	0.43	11.4	9.24	0.17	12.9	8.8	0.82	0.12	0.08
Abitibi	RE-OS SYSTEMATICS OF THE 2.7-GA KOMATIITE FROM ALEXO, ONTARIO, CANADA	ALX-5W	BASALT	48.47	-81.4	2762	0.999935	1356.97	1.56167	47.73	0.59	11.26	10.57	0.19	11.62	17.04	0.09	0.01	0.04
Rhodesia	THE MAFIC AND ULTRAMAFIC LAVAS OF THE BELINGWE GREENSTONE BELT, RHODESIA	BL8	BASALT	-20.57	30.4	2760	0.999832	1406.09	1.77677	53.32	1.46	8.84	12.66	0.2	8.32	12.76	2.02	0.13	0.15
Rhodesia	THE MAFIC AND ULTRAMAFIC LAVAS OF THE BELINGWE GREENSTONE BELT, RHODESIA	BL26	BASALT	-20.57	30.4	2760	0.999935	1395.13	1.89015	51.43	0.84	14.71	12.19	0.21	7.09	11.27	1.96	0.1	0.07
Rhodesia	THE MAFIC AND ULTRAMAFIC LAVAS OF THE BELINGWE GREENSTONE BELT, RHODESIA	BL28	BASALT	-20.57	30.4	2760	0.999935	1385.9	1.88079	50.62	0.89	14.99	11.93	0.2	7.92	11.35	1.69	0.23	0.07
Rhodesia	THE MAFIC AND ULTRAMAFIC LAVAS OF THE BELINGWE GREENSTONE BELT, RHODESIA	BL27	BASALT	-20.57	30.4	2760	0.99993	1360.87	1.60573	52.58	0.86	14.99	11.42	0.19	7.03	10.23	2.35	0.15	0.07
Rhodesia	THE MAFIC AND ULTRAMAFIC LAVAS OF THE BELINGWE GREENSTONE BELT, RHODESIA	BL22	BASALT	-20.57	30.4	2760	0.999935	1355.73	1.60605	50.29	0.76	15.72	11.14	0.17	8.38	12.22	1.03	0.11	0.06
Rhodesia	THE MAFIC AND ULTRAMAFIC LAVAS OF THE BELINGWE GREENSTONE BELT, RHODESIA	NG110	BASALT	-20.33	30.03	2760	0.999935	1353.82	1.59235	53.41	0.82	15.09	11.52	0.15	7.76	7.47	3.2	0.39	0.06
Rhodesia	THE MAFIC AND ULTRAMAFIC LAVAS OF THE BELINGWE GREENSTONE BELT, RHODESIA	NG133	BASALT	-20.33	30.03	2760	0.99993	1344.95	1.38786	53.77	0.55	11.12	11.49	0.2	11.5	8.65	2.55	0.02	0.03
Rhodesia	THE MAFIC AND ULTRAMAFIC LAVAS OF THE BELINGWE GREENSTONE BELT, RHODESIA	BL34	BASALT	-20.57	30.4	2760	0.999935	1336.77	1.32204	52.6	0.89	13.06	11.12	0.17	10.74	9.63	0.8	0.78	0.1
Rhodesia	THE MAFIC AND ULTRAMAFIC LAVAS OF THE BELINGWE GREENSTONE BELT, RHODESIA	SF134	BASALT	-20.57	30.4	2760	0.999935	1334.46	1.77263	49.32	0.48	15.94	10.74	0.22	13.28	5.72	2.66	0.57
Rhodesia	THE MAFIC AND ULTRAMAFIC LAVAS OF THE BELINGWE GREENSTONE BELT, RHODESIA	NG161	BASALT	-20.33	30.03	2760	0.999935	1330.45	1.41316	53.5	0.87	14.58	10.85	0.15	8.09	8.57	2.91	0.29	0.07
Rhodesia	THE MAFIC AND ULTRAMAFIC LAVAS OF THE BELINGWE GREENSTONE BELT, RHODESIA	BL33	BASALT	-20.57	30.4	2760	0.999742	1298.74	1.15078	53.62	0.87	14.64	10.24	0.17	10.04	7.67	2.43	0.11	0.09
Rhodesia	THE MAFIC AND ULTRAMAFIC LAVAS OF THE BELINGWE GREENSTONE BELT, RHODESIA	BL1	BASALT	-20.57	30.4	2760	0.999935	1274.27	1.09563	52.85	0.73	15.25	9.05	0.16	7.57	11.75	2.49	0.01	0.06
Superior	DEVELOPMENT AND DEGRADATION OF ARCHEAN LAVAS, ABITIBI AREA, IN LIGHT OF MAJOR ELEMENT GEOCHEMISTRY	1060(60)	BASALT	48.5	-79.2	2750	0.999935	1460.53	2.44477	49.9	0.95	14	13.8	0.22	7.64	9.68	1.59	0.24
Superior	DEVELOPMENT AND DEGRADATION OF ARCHEAN LAVAS, ABITIBI AREA, IN LIGHT OF MAJOR ELEMENT GEOCHEMISTRY	1054A(68)	BASALT	48.5	-79.2	2750	0.999935	1449.06	2.57518	47.8	0.81	16.9	13.4	0.21	9.43	10.4	0.91	0.19
Superior	DEVELOPMENT AND DEGRADATION OF ARCHEAN LAVAS, ABITIBI AREA, IN LIGHT OF MAJOR ELEMENT GEOCHEMISTRY	1095(26)	BASALT	48.5	-79.2	2750	0.999935	1438.63	2.33073	49.5	0.79	10.7	12.9	0.21	7.8	10.5	2.7	0.17
Superior	DEVELOPMENT AND DEGRADATION OF ARCHEAN LAVAS, ABITIBI AREA, IN LIGHT OF MAJOR ELEMENT GEOCHEMISTRY	1071(50)	ANDESITE	48.5	-79.2	2750	0.999935	1434.64	1.80477	53.1	1.04	11	13.5	0.2	7.12	9	1.38	0.17
Superior	DEVELOPMENT AND DEGRADATION OF ARCHEAN LAVAS, ABITIBI AREA, IN LIGHT OF MAJOR ELEMENT GEOCHEMISTRY	265	BASALT	48.5	-79.2	2750	0.999935	1414.53	1.83527	48.1	0.26	18.7	12.52	0.14	6.75	5.91	0.47	0.13
Superior	DEVELOPMENT AND DEGRADATION OF ARCHEAN LAVAS, ABITIBI AREA, IN LIGHT OF MAJOR ELEMENT GEOCHEMISTRY	1075B(46)	BASALT	48.5	-79.2	2750	0.999935	1361.58	1.66295	49.3	0.69	13.2	11.1	0.21	8.48	10.5	1.3	0.68
Superior	DEVELOPMENT AND DEGRADATION OF ARCHEAN LAVAS, ABITIBI AREA, IN LIGHT OF MAJOR ELEMENT GEOCHEMISTRY	287	BASALT	48.5	-79.2	2750	0.999816	1356.12	1.5389	49.1	1.25	15.7	10.83	0.09	6.6	9.88	0.62	0.68
Superior	DEVELOPMENT AND DEGRADATION OF ARCHEAN LAVAS, ABITIBI AREA, IN LIGHT OF MAJOR ELEMENT GEOCHEMISTRY	213	ANDESITE	48.3	-78.85	2750	0.999726	1310.21	1.29684	51.5	1.49	16.5	9.91	0.12	6.18	7.53	2.38	0.51
Superior	DEVELOPMENT AND DEGRADATION OF ARCHEAN LAVAS, ABITIBI AREA, IN LIGHT OF MAJOR ELEMENT GEOCHEMISTRY	1116(23)	BASALT	48.5	-79.2	2750	0.999935	1258.39	1.07144	46.6	0.5	13.3	7.85	0.16	9.28	14.9	1.06	0.15
Tipasjärvi-Kuhmo-Suomussalmi, Finland	ARCHEAN EVOLUTION OF THE TIPASJÄRVI-KUHMO-SUOMUSSALMI GREENSTONE COMPLEX, FINLAND	5-HP-92	BASALT	64.2324	29.0853	2748	0.96267	1372.98	1.78453	49.49	0.77	15.73	11.28	0.22	7.28	12.83	1.16	0.15	0.05
Eastern Dharwar	SIGNIFICANCE OF THE ARCHEAN BIMODAL VOLCANICS FROM THE RAMNAGIRI SCHIST BELT IN THE FORMATION OF EASTERN DHARWAR CRATON	RM#72	BASALT	14.25	77.55	2746	0.999944	1560.21	3.74786	47.4	2.08	12.7	18	0.13	6.64	6.21	2.67	0.48	0.38
Dharwar	GOLD MINERALISATION AND ALTERATION OF PENAKACHERLA SCHIST BELT, INDIA, CONSTRAINTS ON ARCHAEAN SUBDUCTION AND FLUID PROCESSES	RM166	basalt	14.9	77.25	2746	0.999927	1469.97	2.37537	48.75	0.92	10.65	13.72	0.24	8.44	11.1	0.87	0.03	0.06
Dharwar Craton	PETROGENESIS AND SOURCE CHARACTERISTICS OF METATHOLEIITES FROM THE ARCHEAN RAMAGIRI SCHIST BELT, EASTERN PART OF DHARWAR CRATON, INDIA	W52	THOLEIITE	14.25	77.5	2746	0.990886	1416.39	2.25782	49.33	0.92	15.71	12.22	0.21	6.26	13.3	1.84	0.14
Dharwar Craton	PETROGENESIS AND SOURCE CHARACTERISTICS OF METATHOLEIITES FROM THE ARCHEAN RAMAGIRI SCHIST BELT, EASTERN PART OF DHARWAR CRATON, INDIA	W32	THOLEIITE	14.25	77.5	2746	0.990837	1414.96	2.19734	50.04	0.96	14.9	12.46	0.21	7.05	12.04	2.02	0.18
Dharwar Craton	PETROGENESIS AND SOURCE CHARACTERISTICS OF METATHOLEIITES FROM THE ARCHEAN RAMAGIRI SCHIST BELT, EASTERN PART OF DHARWAR CRATON, INDIA	W47	THOLEIITE	14.25	77.5	2746	0.997388	1412.35	2.07915	49.9	0.85	15.88	12.31	0.22	6.43	12.31	1.43	0.04
Dharwar Craton	PETROGENESIS AND SOURCE CHARACTERISTICS OF METATHOLEIITES FROM THE ARCHEAN RAMAGIRI SCHIST BELT, EASTERN PART OF DHARWAR CRATON, INDIA	W16	THOLEIITE	14.25	77.5	2746	0.976397	1411.66	2.27303	49.6	0.97	15.65	12.56	0.21	8.63	9.17	2.68	0.12
Dharwar Craton	PETROGENESIS AND SOURCE CHARACTERISTICS OF METATHOLEIITES FROM THE ARCHEAN RAMAGIRI SCHIST BELT, EASTERN PART OF DHARWAR CRATON, INDIA	E24	THOLEIITE	14.25	77.55	2746	0.996692	1409.58	2.2207	49.7	0.96	15.5	12.3	0.21	7.34	11.47	2.22	0.2
Dharwar Craton	PETROGENESIS AND SOURCE CHARACTERISTICS OF METATHOLEIITES FROM THE ARCHEAN RAMAGIRI SCHIST BELT, EASTERN PART OF DHARWAR CRATON, INDIA	E36	THOLEIITE	14.25	77.55	2746	0.977218	1406.73	2.16764	50.61	0.97	14.77	12.19	0.22	6.47	11.78	2.59	0.3
Dharwar Craton	PETROGENESIS AND SOURCE CHARACTERISTICS OF METATHOLEIITES FROM THE ARCHEAN RAMAGIRI SCHIST BELT, EASTERN PART OF DHARWAR CRATON, INDIA	Z47	THOLEIITE	14.25	77.55	2746	0.998147	1406.06	2.07648	46.2	0.79	14.7	11.4	0.2	5.95	11.4	1.32	0.04
Dharwar Craton	PETROGENESIS AND SOURCE CHARACTERISTICS OF METATHOLEIITES FROM THE ARCHEAN RAMAGIRI SCHIST BELT, EASTERN PART OF DHARWAR CRATON, INDIA	Z37	THOLEIITE	14.25	77.55	2746	0.996375	1403.54	1.91921	51.05	0.86	15.02	12.57	0.19	8.06	9.01	1.85	0.13
Dharwar Craton	PETROGENESIS AND SOURCE CHARACTERISTICS OF METATHOLEIITES FROM THE ARCHEAN RAMAGIRI SCHIST BELT, EASTERN PART OF DHARWAR CRATON, INDIA	W46	THOLEIITE	14.25	77.5	2746	0.987361	1403	2.13911	48.67	0.84	15.62	12.08	0.21	8.15	10.49	1.98	0
Dharwar Craton	PETROGENESIS AND SOURCE CHARACTERISTICS OF METATHOLEIITES FROM THE ARCHEAN RAMAGIRI SCHIST BELT, EASTERN PART OF DHARWAR CRATON, INDIA	W1	THOLEIITE	14.25	77.5	2746	0.996455	1401.12	2.12254	49.7	1.01	15.28	12.11	0.2	7.31	9.87	2.69	0.06
Dharwar Craton	PETROGENESIS AND SOURCE CHARACTERISTICS OF METATHOLEIITES FROM THE ARCHEAN RAMAGIRI SCHIST BELT, EASTERN PART OF DHARWAR CRATON, INDIA	W49	THOLEIITE	14.25	77.5	2746	0.998908	1399.93	1.95516	50.11	0.9	16.25	12.24	0.21	7.25	11.39	1.33	0
Dharwar Craton	PETROGENESIS AND SOURCE CHARACTERISTICS OF METATHOLEIITES FROM THE ARCHEAN RAMAGIRI SCHIST BELT, EASTERN PART OF DHARWAR CRATON, INDIA	Z39	THOLEIITE	14.25	77.55	2746	0.999106	1399.55	1.8305	53.27	0.99	13.52	12.5	0.19	6.56	10.15	2.14	0.6
Dharwar Craton	PETROGENESIS AND SOURCE CHARACTERISTICS OF METATHOLEIITES FROM THE ARCHEAN RAMAGIRI SCHIST BELT, EASTERN PART OF DHARWAR CRATON, INDIA	W17-6	THOLEIITE	14.25	77.5	2746	0.999898	1398.03	2.03555	49.75	0.89	15.35	12.16	0.21	8.31	11.42	1.65	0.1
Dharwar Craton	PETROGENESIS AND SOURCE CHARACTERISTICS OF METATHOLEIITES FROM THE ARCHEAN RAMAGIRI SCHIST BELT, EASTERN PART OF DHARWAR CRATON, INDIA	W51	THOLEIITE	14.25	77.5	2746	0.997691	1396.15	2.08354	50.88	0.74	15.86	12.26	0.2	7.8	9.01	3.06	0.1
Dharwar Craton	PETROGENESIS AND SOURCE CHARACTERISTICS OF METATHOLEIITES FROM THE ARCHEAN RAMAGIRI SCHIST BELT, EASTERN PART OF DHARWAR CRATON, INDIA	Z49	THOLEIITE	14.25	77.55	2746	0.999097	1395.54	1.95399	47.5	0.85	15.4	11.6	0.2	6.87	10.8	1.26	0
Dharwar Craton	PETROGENESIS AND SOURCE CHARACTERISTICS OF METATHOLEIITES FROM THE ARCHEAN RAMAGIRI SCHIST BELT, EASTERN PART OF DHARWAR CRATON, INDIA	C30	THOLEIITE	14.25	77.55	2746	0.999527	1392.17	2.27703	48.11	0.52	16.74	12.08	0.15	12.63	6.89	2.54	0.16
Dharwar Craton	PETROGENESIS AND SOURCE CHARACTERISTICS OF METATHOLEIITES FROM THE ARCHEAN RAMAGIRI SCHIST BELT, EASTERN PART OF DHARWAR CRATON, INDIA	W54	THOLEIITE	14.25	77.5	2746	0.999869	1392.16	1.54625	53.94	0.6	12.58	12.69	0.21	8.58	9.17	1.58	0
Dharwar Craton	PETROGENESIS AND SOURCE CHARACTERISTICS OF METATHOLEIITES FROM THE ARCHEAN RAMAGIRI SCHIST BELT, EASTERN PART OF DHARWAR CRATON, INDIA	W17-2	THOLEIITE	14.25	77.5	2746	0.999788	1388.87	1.79732	51.44	0.89	14.82	12.17	0.2	8.01	10.51	1.63	0.1
Dharwar Craton	PETROGENESIS AND SOURCE CHARACTERISTICS OF METATHOLEIITES FROM THE ARCHEAN RAMAGIRI SCHIST BELT, EASTERN PART OF DHARWAR CRATON, INDIA	W22	THOLEIITE	14.25	77.5	2746	0.997857	1383.03	1.81469	49.95	0.86	15.49	11.7	0.2	7.81	12.61	1.07	0.02
Dharwar Craton	PETROGENESIS AND SOURCE CHARACTERISTICS OF METATHOLEIITES FROM THE ARCHEAN RAMAGIRI SCHIST BELT, EASTERN PART OF DHARWAR CRATON, INDIA	45674	THOLEIITE	14.25	77.5	2746	0.988244	1382.24	1.86082	50.63	0.83	15.82	11.86	0.2	7.6	10.71	1.89	0.12
Dharwar Craton	PETROGENESIS AND SOURCE CHARACTERISTICS OF METATHOLEIITES FROM THE ARCHEAN RAMAGIRI SCHIST BELT, EASTERN PART OF DHARWAR CRATON, INDIA	W25	THOLEIITE	14.25	77.5	2746	0.996704	1379.79	1.73704	51.97	0.92	15.16	11.97	0.19	7.47	9.77	2.12	0.07
Dharwar Craton	PETROGENESIS AND SOURCE CHARACTERISTICS OF METATHOLEIITES FROM THE ARCHEAN RAMAGIRI SCHIST BELT, EASTERN PART OF DHARWAR CRATON, INDIA	W17-4	THOLEIITE	14.25	77.5	2746	0.999912	1378.4	1.76388	51.07	0.81	15.23	11.81	0.2	7.82	11.15	1.63	0.1
Dharwar Craton	PETROGENESIS AND SOURCE CHARACTERISTICS OF METATHOLEIITES FROM THE ARCHEAN RAMAGIRI SCHIST BELT, EASTERN PART OF DHARWAR CRATON, INDIA	W17-3	THOLEIITE	14.25	77.5	2746	0.999935	1370.99	1.60362	52.64	0.82	15	11.82	0.21	7.35	10.23	1.83	0.1
Dharwar Craton	PETROGENESIS AND SOURCE CHARACTERISTICS OF METATHOLEIITES FROM THE ARCHEAN RAMAGIRI SCHIST BELT, EASTERN PART OF DHARWAR CRATON, INDIA	C53	THOLEIITE	14.25	77.55	2746	0.999446	1370.81	1.63485	52.77	0.53	10.79	11.94	0.2	11.41	9.61	2.52	0
Dharwar Craton	PETROGENESIS AND SOURCE CHARACTERISTICS OF METATHOLEIITES FROM THE ARCHEAN RAMAGIRI SCHIST BELT, EASTERN PART OF DHARWAR CRATON, INDIA	W50	THOLEIITE	14.25	77.5	2746	0.999517	1367.14	1.85775	50.25	0.71	15.76	11.5	0.18	8.92	9.31	2.63	0.03
Dharwar Craton	PETROGENESIS AND SOURCE CHARACTERISTICS OF METATHOLEIITES FROM THE ARCHEAN RAMAGIRI SCHIST BELT, EASTERN PART OF DHARWAR CRATON, INDIA	Z50	THOLEIITE	14.25	77.55	2746	0.999342	1362.07	1.85749	47.2	0.67	14.8	10.8	0.17	8.38	8.74	2.47	0.03
Dharwar	GEOCHEMICAL SYSTEMATICS OF THOLEIITIC BASALTS FROM THE 2.7 GA RAMAGIRI-HUNGUND COMPOSITE GREENSTONE BELT, DHARWAR CRATON	P24	BASALT	14.75	77.25	2746	0.954087	1355.82	1.76781	49.9	0.64	13.22	11.07	0.2	10.08	10.45	2.44	0.18	0.05
Dharwar Craton	PETROGENESIS AND SOURCE CHARACTERISTICS OF METATHOLEIITES FROM THE ARCHEAN RAMAGIRI SCHIST BELT, EASTERN PART OF DHARWAR CRATON, INDIA	W11	THOLEIITE	14.25	77.5	2746	0.999309	1349.62	1.55698	50.72	0.81	15.75	10.71	0.17	6.42	13.76	1.33	0.08
Dharwar Craton	PETROGENESIS AND SOURCE CHARACTERISTICS OF METATHOLEIITES FROM THE ARCHEAN RAMAGIRI SCHIST BELT, EASTERN PART OF DHARWAR CRATON, INDIA	C29	THOLEIITE	14.25	77.55	2746	0.986045	1348.28	1.31005	53.68	0.94	14.6	11.46	0.17	8.01	10.18	1.04	0.28
Dharwar	GEOCHEMICAL SYSTEMATICS OF THOLEIITIC BASALTS FROM THE 2.7 GA RAMAGIRI-HUNGUND COMPOSITE GREENSTONE BELT, DHARWAR CRATON	P31	BASALT	14.75	77.25	2746	0.948955	1336.83	1.47666	50.54	0.6	12.93	10.49	0.18	8.71	12.97	1.63	0.22	0.05
Dharwar Craton	PETROGENESIS AND SOURCE CHARACTERISTICS OF METATHOLEIITES FROM THE ARCHEAN RAMAGIRI SCHIST BELT, EASTERN PART OF DHARWAR CRATON, INDIA	C6	THOLEIITE	14.25	77.55	2746	0.999889	1329.06	1.54509	51.5	0.86	16.79	10.74	0.14	8.89	8.02	2.58	0.35
Dharwar	GEOCHEMICAL SYSTEMATICS OF THOLEIITIC BASALTS FROM THE 2.7 GA RAMAGIRI-HUNGUND COMPOSITE GREENSTONE BELT, DHARWAR CRATON	P33	BASALT	14.75	77.25	2746	0.944505	1315.32	1.35692	50.71	0.64	13.41	10.04	0.17	8.86	11.74	2	0.13	0.05
Dharwar Craton	PETROGENESIS AND SOURCE CHARACTERISTICS OF METATHOLEIITES FROM THE ARCHEAN RAMAGIRI SCHIST BELT, EASTERN PART OF DHARWAR CRATON, INDIA	E40	THOLEIITE	14.25	77.55	2746	0.996044	1305.77	1.22847	52.46	0.7	15.06	9.98	0.17	8.06	11.56	1.85	0.1
Dharwar Craton	PETROGENESIS AND SOURCE CHARACTERISTICS OF METATHOLEIITES FROM THE ARCHEAN RAMAGIRI SCHIST BELT, EASTERN PART OF DHARWAR CRATON, INDIA	E43	THOLEIITE	14.25	77.55	2746	0.994628	1295.53	1.15582	52.61	0.67	14.99	9.77	0.17	8.35	11.42	1.82	0.1
Eastern Dharwar	GEOCHEMISTRY OF THE NEO-ARCHAEAN HIGH-MG BASALTS, BONINITES AND ADAKITES FROM THE KUSHTAGI-HUNGUND GREENSTONE BELT OF THE EASTERN DHARWAR CRATON (EDC); IMPLICATIONS FOR THE TECTONIC SETTING	RIH-19	BASALT	15.8975	76.0181	2746	0.950415	1282.67	1.06648	51.47	0.45	14.1	9.48	0.17	10.96	10.63	1.31	0.08	0.03
Dharwar Craton	PETROGENESIS AND SOURCE CHARACTERISTICS OF METATHOLEIITES FROM THE ARCHEAN RAMAGIRI SCHIST BELT, EASTERN PART OF DHARWAR CRATON, INDIA	42	THOLEIITE	14.25	77.55	2746	0.998068	1274.22	0.999652	53.13	0.64	15.04	9.21	0.16	8.2	11.73	1.75	0.09
Tipasjärvi-Kuhmo-Suomussalmi, Finland	ARCHEAN EVOLUTION OF THE TIPASJÄRVI-KUHMO-SUOMUSSALMI GREENSTONE COMPLEX, FINLAND	44.1	BASALT	64.2836	29.0756	2745	0.976289	1595.06	4.29443	47.7	0.51	9.3	16.83	0.33	11.1	9.8	0.88	1.44	0.03
Tipasjärvi-Kuhmo-Suomussalmi, Finland	ARCHEAN EVOLUTION OF THE TIPASJÄRVI-KUHMO-SUOMUSSALMI GREENSTONE COMPLEX, FINLAND	57.1	BASALT	64.3083	29.0921	2745	0.965432	1387.13	1.74587	51.7	1.38	14.4	12.14	0.21	7.34	9.26	1.86	0.22	0.13
Superior	TRACE ELEMENT GEOCHEMISTRY OF THE MEEN-DEMPSTER GREENSTONE BELT, UCHI SUBPROVINCE, SUPERIOR PROVINCE, CANADA: BACK-ARC DEVELOPMENT ON THE MARGINS OF AN ARCHEAN PROTOCONTINENT	84GRS-0032	THOLEIITE	51	-91	2742	0.931072	1463.2	2.73482	49.95	1.78	14.78	13.68	0.23	6.33	7.66	3.82	0.12	0.11
Superior	TRACE ELEMENT GEOCHEMISTRY OF THE MEEN-DEMPSTER GREENSTONE BELT, UCHI SUBPROVINCE, SUPERIOR PROVINCE, CANADA: BACK-ARC DEVELOPMENT ON THE MARGINS OF AN ARCHEAN PROTOCONTINENT	82GRS-0292	THOLEIITE	51	-91	2742	0.990648	1400.8	2.1712	48.27	0.95	15.07	11.92	0.19	8.44	11.92	1.62	0.24	0.05
Superior	TRACE ELEMENT GEOCHEMISTRY OF THE MEEN-DEMPSTER GREENSTONE BELT, UCHI SUBPROVINCE, SUPERIOR PROVINCE, CANADA: BACK-ARC DEVELOPMENT ON THE MARGINS OF AN ARCHEAN PROTOCONTINENT	82GRS-0088	THOLEIITE	51	-91	2742	0.994262	1374.78	1.72587	50.81	0.84	14.3	11.5	0.19	6.98	12.17	1.62	0.21	0.1
Superior	BASIC LAVAS OF THE ARCHEAN LA GRANDE GREENSTONE BELT: PRODUCTS OF POLYBARIC FRACTIONATION AND CRUSTAL CONTAMINATION	216	THOLEIITE	53.75	-75.5	2741.5	0.998145	1356.85	1.78441	48.47	0.83	16.51	10.85	0.2	7.61	9.4	2.23	0.02	0.06
Superior	BASIC LAVAS OF THE ARCHEAN LA GRANDE GREENSTONE BELT: PRODUCTS OF POLYBARIC FRACTIONATION AND CRUSTAL CONTAMINATION	18A	THOLEIITE	53.75	-75.5	2741.5	0.98706	1351.19	1.45894	51.83	1.05	15.02	11.1	0.23	6.83	9.46	1.81	0.16	0.06
Superior	BASIC LAVAS OF THE ARCHEAN LA GRANDE GREENSTONE BELT: PRODUCTS OF POLYBARIC FRACTIONATION AND CRUSTAL CONTAMINATION	285C	ANDESITE	53.75	-75.5	2741.5	0.95542	1268.03	1.09475	49.79	0.4	9.39	8.81	0.18	15.43	10.34	1.49	0.54	0.09
Superior	GEOCHEMISTRY AND AGE OF TIMISKAMING ALKALI VOLCANICS AND THE OTTO SYENITE STOCK, ABITIBI, ONTARIO	AA21505	BASALT	48	-80	2740	0.999843	1249.59	1.30057	52.97	1	13.4	8.2		7	9.22	3	3.43
Superior	NEOARCHEAN EVOLUTION OF DIFFERING CONVERGENT MARGIN ASSEMBLAGES IN THE WABIGOON SUBPROVINCE: GEOCHEMICAL AND GEOCHRONOLOGICAL EVIDENCE FROM THE LAKE OF THE WOODS GREENSTONE BELTS, SUPERIOR PROVINCE, NORTHWESTERN CANADA	87-615	basalt	49.2	-94.6	2738	0.998718	1428.47	2.2232	47.9	0.77	14.3	12.69	0.2	8.27	8.66	1.74	0.04	0.05
Superior	NEOARCHEAN EVOLUTION OF DIFFERING CONVERGENT MARGIN ASSEMBLAGES IN THE WABIGOON SUBPROVINCE: GEOCHEMICAL AND GEOCHRONOLOGICAL EVIDENCE FROM THE LAKE OF THE WOODS GREENSTONE BELTS, SUPERIOR PROVINCE, NORTHWESTERN CANADA	32874	basalt	49.2	-94.6	2738	0.972948	1407.68	2.22288	48.57	0.87	14.9	12.12	0.21	7.57	10.74	1.88	0.62	0.06
Superior	NEOARCHEAN EVOLUTION OF DIFFERING CONVERGENT MARGIN ASSEMBLAGES IN THE WABIGOON SUBPROVINCE: GEOCHEMICAL AND GEOCHRONOLOGICAL EVIDENCE FROM THE LAKE OF THE WOODS GREENSTONE BELTS, SUPERIOR PROVINCE, NORTHWESTERN CANADA	93-23	basalt	49.2	-94.6	2738	0.94847	1405.24	2.06405	49.2	0.73	14.3	12.15	0.21	8.05	11.3	1.71	0.09	0.07
Superior	NEOARCHEAN EVOLUTION OF DIFFERING CONVERGENT MARGIN ASSEMBLAGES IN THE WABIGOON SUBPROVINCE: GEOCHEMICAL AND GEOCHRONOLOGICAL EVIDENCE FROM THE LAKE OF THE WOODS GREENSTONE BELTS, SUPERIOR PROVINCE, NORTHWESTERN CANADA	93-37	basalt	49.2	-94.6	2738	0.978724	1362.46	1.52199	46.8	0.67	14.9	10.8	0.18	7.6	9.83	0.29	0.02	0.07
Superior	NEOARCHEAN EVOLUTION OF DIFFERING CONVERGENT MARGIN ASSEMBLAGES IN THE WABIGOON SUBPROVINCE: GEOCHEMICAL AND GEOCHRONOLOGICAL EVIDENCE FROM THE LAKE OF THE WOODS GREENSTONE BELTS, SUPERIOR PROVINCE, NORTHWESTERN CANADA	86-359	basalt	49.2	-94.6	2738	0.992091	1344.96	1.62983	49.9	0.6	13.3	10.71	0.15	8.54	9.12	2.97	0.03	0.04
Superior	NEOARCHEAN EVOLUTION OF DIFFERING CONVERGENT MARGIN ASSEMBLAGES IN THE WABIGOON SUBPROVINCE: GEOCHEMICAL AND GEOCHRONOLOGICAL EVIDENCE FROM THE LAKE OF THE WOODS GREENSTONE BELTS, SUPERIOR PROVINCE, NORTHWESTERN CANADA	85S-113	basalt	49.2	-94.6	2738	0.997787	1335	1.48491	47.6	0.46	10.6	10.22	0.19	13.8	11.9	0.83	0	0.03
Superior	NEOARCHEAN EVOLUTION OF DIFFERING CONVERGENT MARGIN ASSEMBLAGES IN THE WABIGOON SUBPROVINCE: GEOCHEMICAL AND GEOCHRONOLOGICAL EVIDENCE FROM THE LAKE OF THE WOODS GREENSTONE BELTS, SUPERIOR PROVINCE, NORTHWESTERN CANADA	85S-336	basalt	49.2	-94.6	2738	0.986964	1329.66	1.75009	47.5	0.57	15.6	9.94	0.17	8.45	9.86	2.89	0.02	0.01
Superior	NEOARCHEAN EVOLUTION OF DIFFERING CONVERGENT MARGIN ASSEMBLAGES IN THE WABIGOON SUBPROVINCE: GEOCHEMICAL AND GEOCHRONOLOGICAL EVIDENCE FROM THE LAKE OF THE WOODS GREENSTONE BELTS, SUPERIOR PROVINCE, NORTHWESTERN CANADA	86-168	basalt	49.2	-94.6	2738	0.989183	1303.2	1.5244	47.1	0.5	17.8	9.36	0.15	9.39	10.7	1.42	0.17	0.04
Uchi-Confederation, Canada	THE GEOCHEMISTRY OF REPETITIVE CYCLICAL VOLCANISM FROM BASALT THROUGH RHYOLITE IN THE UCHI-CONFEDERATION GREENSTONE BELT, CANADA	462	BASALT	51.12	-92.63	2737	0.963083	1391.84	2.44211	47.1	0.9	17.6	11.6	0.19	9.68	9.6	2.98	0.03	0.02
Uchi-Confederation, Canada	THE GEOCHEMISTRY OF REPETITIVE CYCLICAL VOLCANISM FROM BASALT THROUGH RHYOLITE IN THE UCHI-CONFEDERATION GREENSTONE BELT, CANADA	461	BASALT	51.1	-92.63	2737	0.962269	1323.72	1.7857	48.9	0.8	17	10	0.17	8.91	10.9	3.07	0	0.02
Pilbara	THE OLDEST CONTINENTAL AND OCEANIC PLATEAUS: GEOCHEMISTRY OF BASALTS AND KOMATIITES OF THE PILBARA CRATON, AUSTRALIA	105707	basalt	-22.925	117.384	2735	0.993043	1373.33	1.28901	53.49	0.78	9.48	12.4	0.18	16.08	6.86	0.37	0.22	0.13
Pilbara	THE OLDEST CONTINENTAL AND OCEANIC PLATEAUS: GEOCHEMISTRY OF BASALTS AND KOMATIITES OF THE PILBARA CRATON, AUSTRALIA	96983R	BASALT	-21	117.5	2735	0.999663	1326.73	1.46503	53.88	0.63	16.76	10.83	0.16	7.31	5.99	3.95	0.38	0.1
Pilbara	THE OLDEST CONTINENTAL AND OCEANIC PLATEAUS: GEOCHEMISTRY OF BASALTS AND KOMATIITES OF THE PILBARA CRATON, AUSTRALIA	96919R	BASALT	-21	117.5	2735	0.96364	1317.13	1.44774	53.28	0.66	16.69	10.25	0.16	6.54	8.38	3.88	0.04	0.12
Pilbara	THE OLDEST CONTINENTAL AND OCEANIC PLATEAUS: GEOCHEMISTRY OF BASALTS AND KOMATIITES OF THE PILBARA CRATON, AUSTRALIA	96985R	BASALT	-21	117.5	2735	0.993457	1312.19	1.27019	53.6	0.58	16.1	10.41	0.16	7.74	8.59	2.64	0.15	0.08
Pilbara	THE OLDEST CONTINENTAL AND OCEANIC PLATEAUS: GEOCHEMISTRY OF BASALTS AND KOMATIITES OF THE PILBARA CRATON, AUSTRALIA	96984R	BASALT	-21	117.5	2735	0.996833	1311.67	1.27446	53.01	0.59	16.23	10.32	0.15	8.15	9.04	2.35	0.07	0.09
Pilbara	THE OLDEST CONTINENTAL AND OCEANIC PLATEAUS: GEOCHEMISTRY OF BASALTS AND KOMATIITES OF THE PILBARA CRATON, AUSTRALIA	96922R	BASALT	-21	117.5	2735	0.949796	1299.41	1.25193	53.65	0.61	16.04	10	0.15	7.88	8.28	3.25	0.04	0.11
Yilgarn	OCCURRENCE OF KOMATIITES IN THE SANDSTONE GREENSTONE BELT, NORTH-CENTRAL YILGARN CRATON	178344	BASALT	-27.5	119	2731	0.946573	1308.55	1.31721	48.09	0.51	9.42	9.69	0.18	16.69	8.71	1.18	0.09	0.06
Superior Province	PLATINUM GROUP MINERAL OCCURRENCE ASSOCIATED WITH FLOW TO AMYGDULE SULFIDES IN KOMATIITIC BASALT, ABITIBI GREENSTONE BELT, ONTARIO	OLSX	BASALT	48.2	-80.1	2730	0.999935	1480.22	2.96875	46.45	0.65	12	13.64	0.24	14.11	11.82	0.63	0	0.02
Superior Province	PLATINUM GROUP MINERAL OCCURRENCE ASSOCIATED WITH FLOW TO AMYGDULE SULFIDES IN KOMATIITIC BASALT, ABITIBI GREENSTONE BELT, ONTARIO	AMYBST	BASALT	48.2	-80.1	2730	0.999898	1370.68	1.5269	52.56	0.64	12.83	12.09	0.17	10.85	8.55	1.64	0.03	0.03
Brazil	BIZARRE GEOCHEMISTRY OF KOMATIITES FROM THE CRIXAS GREENSTONE BELT, BRAZIL	NPA8E	BASALT	-14.5	-50	2728	0.9899	1372.35	1.71906	51.5	0.85	12	11.7		9.1	10.64	2.45	0.14	0.13
Brazil	BIZARRE GEOCHEMISTRY OF KOMATIITES FROM THE CRIXAS GREENSTONE BELT, BRAZIL	NPA8A	BASALT	-14.5	-50	2728	0.99993	1368.1	1.76775	51.3	0.78	12.1	11.6		10.3	10.9	2.5	0.15	0.08
Brazil	BIZARRE GEOCHEMISTRY OF KOMATIITES FROM THE CRIXAS GREENSTONE BELT, BRAZIL	NPA8C	BASALT	-14.5	-50	2728	0.974442	1323.01	1.4057	52.4	0.92	12.7	10.5		9.4	10.2	2.81	0.15	0.11
Brazil	BIZARRE GEOCHEMISTRY OF KOMATIITES FROM THE CRIXAS GREENSTONE BELT, BRAZIL	NPA8D	BASALT	-14.5	-50	2728	0.939748	1310.42	1.29408	53.5	0.84	12.7	10.4		10.5	9.8	2.92	0	0.12
Abitibi	THE KEY TUFFITE, MATAGAMI CAMP, ABITIBI GREENSTONE BELT, CANADA: PETROGENESIS AND IMPLICATIONS FOR VMS FORMATION AND EXPLORATION	969353	basalt	49.75	-77.63	2725.65	0.997539	1173.22	0.125003	53.4434	0.4181	16.5273	7.18	0.0477	14.0922	0.01	0.073	0.5063	0.015
Kaapvaal Craton	GEOCHEMISTRY AND PETROGENESIS OF EARLY PROTEROZOIC INTRACRATONIC VOLCANIC ROCKS OF THE VENTERSDORP SUPERGROUP, SOUTH AFRICA	3765	BASALT	-26.87	26.65	2725	0.98971	1425.1	1.84359	52.2	1.45	15.4	13.76		9.67	5.46	0.04	1.39	0.18
Kaapvaal Craton	GEOCHEMISTRY AND PETROGENESIS OF EARLY PROTEROZOIC INTRACRATONIC VOLCANIC ROCKS OF THE VENTERSDORP SUPERGROUP, SOUTH AFRICA	654	BASALT	-27.98	26.73	2725	0.999491	1395.18	1.99891	52.82	0.72	14.1	12.41	0.2	7.16	7.91	3.8	0.49	0.08
Superior Province	KOMATIITE FLOODING OF A RIFTED ARCHEAN RHYOLITIC ARC COMPLEX: GEOCHEMICAL SIGNATURE AND TECTONIC SIGNIFICANCE OF THE STOUGHTON-ROQUEMAURE GROUP, ABITIBI GREENSTONE BELT, CANADA	WP-94-5	BASALT	48.5	-79.2	2725	0.980624	1347.92	1.77938	47.27	0.66	14.87	10.55	0.2	9.41	8.94	1.96	0.4	0.04
Kaapvaal Craton	GEOCHEMISTRY AND PETROGENESIS OF EARLY PROTEROZOIC INTRACRATONIC VOLCANIC ROCKS OF THE VENTERSDORP SUPERGROUP, SOUTH AFRICA	999	ANDESITE	-27.98	26.73	2725	0.999424	1326.56	1.43966	53.64	0.64	13.76	10.61		7.32	9.74	2.53	1.34	0.14
Superior	GEOCHEMISTRY AND ORIGIN OF ARCHEAN VOLCANIC ROCKS FROM THE UPPER KEEWATIN ASSEMBLAGE (CA. 2.7 GA), LAKE OF THE WOODS GREENSTONE BELT, WESTERN WABIGOON SUBPROVINCE, SUPERIOR PROVINCE, CANADA	K40	THOLEIITE	49.2	-94.6	2723	0.993098	1370.63	1.68224	50.87	0.51	12.72	11.75	0.17	11.66	10.59	1.48	0	0.25
Superior	GEOCHEMISTRY AND ORIGIN OF ARCHEAN VOLCANIC ROCKS FROM THE UPPER KEEWATIN ASSEMBLAGE (CA. 2.7 GA), LAKE OF THE WOODS GREENSTONE BELT, WESTERN WABIGOON SUBPROVINCE, SUPERIOR PROVINCE, CANADA	K120	BASALT	49.2	-94.6	2723	0.989653	1362.03	1.86587	51.58	0.92	12.92	11.32	0.15	8.37	10.84	2.42	1.49
Superior	GEOCHEMISTRY AND ORIGIN OF ARCHEAN VOLCANIC ROCKS FROM THE UPPER KEEWATIN ASSEMBLAGE (CA. 2.7 GA), LAKE OF THE WOODS GREENSTONE BELT, WESTERN WABIGOON SUBPROVINCE, SUPERIOR PROVINCE, CANADA	K170	THOLEIITE	49.2	-94.6	2723	0.990998	1351.4	1.65083	50.34	0.58	12.71	11.06	0.18	11.39	11.79	1.56	0.26	0.13
Superior	DECIPHERING AN ARCHEAN MANTLE PLUME: ABITIBI GREENSTONE BELT, CANADA	ROQ-1B	BASALT	48.2	-80	2723	0.976287	1348.91	1.64808	50.89	0.76	13.66	10.86	0.18	7.32	8.74	3.46	0.06	0.06
Superior	DECIPHERING AN ARCHEAN MANTLE PLUME: ABITIBI GREENSTONE BELT, CANADA	ROQ-8	BASALT	48.2	-80	2723	0.910109	1348.47	1.6873	49.87	0.73	13.48	10.69	0.17	8.14	10.67	2.8	0.03	0.05
Superior	DECIPHERING AN ARCHEAN MANTLE PLUME: ABITIBI GREENSTONE BELT, CANADA	ROQ-8B	BASALT	48.2	-80	2723	0.99465	1347.22	1.69362	49.85	0.74	13.77	10.62	0.17	7.83	10.77	2.87	0.03	0.06
Superior	GEOCHEMISTRY AND ORIGIN OF ARCHEAN VOLCANIC ROCKS FROM THE UPPER KEEWATIN ASSEMBLAGE (CA. 2.7 GA), LAKE OF THE WOODS GREENSTONE BELT, WESTERN WABIGOON SUBPROVINCE, SUPERIOR PROVINCE, CANADA	K146	ANDESITE	49.2	-94.6	2723	0.959864	1321.38	1.39324	53.61	0.86	16.4	10.86	0.2	8.82	5.05	3.18	0.78	0.25
Superior	GEOCHEMISTRY AND ORIGIN OF ARCHEAN VOLCANIC ROCKS FROM THE UPPER KEEWATIN ASSEMBLAGE (CA. 2.7 GA), LAKE OF THE WOODS GREENSTONE BELT, WESTERN WABIGOON SUBPROVINCE, SUPERIOR PROVINCE, CANADA	K159	THOLEIITE	49.2	-94.6	2723	0.99776	1297.44	1.2924	51.37	0.63	14.87	9.41	0.18	6.81	10.63	2.98	0.01	0.11
Superior	GEOCHEMISTRY AND ORIGIN OF ARCHEAN VOLCANIC ROCKS FROM THE UPPER KEEWATIN ASSEMBLAGE (CA. 2.7 GA), LAKE OF THE WOODS GREENSTONE BELT, WESTERN WABIGOON SUBPROVINCE, SUPERIOR PROVINCE, CANADA	K153	THOLEIITE	49.2	-94.6	2723	0.981447	1294.59	1.23709	52.42	0.57	13.71	9.79	0.17	9.72	10.85	2.59	0.01	0.17
Abitibi	SPATIAL AND TEMPORAL VARIATIONS IN THE GEOCHEMISTRY OF KOMATIITES AND KOMATIITIC BASALTS IN THE ABITIBI GREENSTONE BELT	ROQ95-7	BASALT	48.2	-80	2722.5	0.999879	1375.74	1.73233	50.58	0.84	9.18	11.8	0.19	16.49	9.03	1.51	0.01	0.06
Yilgarn	LONG-LIVED, AUTOCHTHONOUS DEVELOPMENT OF THE ARCHEAN MURCHISON DOMAIN, AND IMPLICATIONS FOR YILGARN CRATON TECTONICS	190507	BASALT	-26.5	118.3	2722.5	0.907314	1307.58	1.16887	51.993	0.615	14.351	9.81	0.179	6.684	10.278	1.849	0.304	0.101
Yilgarn	LONG-LIVED, AUTOCHTHONOUS DEVELOPMENT OF THE ARCHEAN MURCHISON DOMAIN, AND IMPLICATIONS FOR YILGARN CRATON TECTONICS	190540	BASALT	-26.5	118.3	2722.5	0.999887	1217.16	0.781548	53.387	0.626	15.097	7.46	0.145	6.794	10.82	2.548	0.486	0.101
Superior	THE GEOCHEMISTRY OF KOMATIITES AND BASALTS FROM THE DEADMAN HILL AREA, MUNRO TOWNSHIP, ONTARIO, CANADA	NFT4119	THOLEIITE	48.48	-81.33	2720	0.993765	1559.74	4.07316	47.99	1.77	13.83	15.91	0.39	6.88	8.93	2.92	0.91	0.14
Superior	THE GEOCHEMISTRY OF KOMATIITES AND BASALTS FROM THE DEADMAN HILL AREA, MUNRO TOWNSHIP, ONTARIO, CANADA	NFT5180	THOLEIITE	48.48	-81.33	2720	0.998678	1542.38	3.81445	49.56	1.55	12.79	15.67	0.28	6.37	8.19	2.86	2.28	0.13
Abitibi	SILICATE-PEROVSKITE AND MAJORITE SIGNATURE KOMATIITES FROM THE ARCHEAN ABITIBI GREENSTONE BELT: IMPLICATIONS FOR EARLY MANTLE DIFFERENTIATION AND STRATIFICATION	mp-23	THOLEIITE	48.47	-81.4	2720	0.944766	1526.31	3.28041	46.1	1.61	13.6	14.67	0.2	6.74	10	1.25	0.06	0.11
Superior	THE GEOCHEMISTRY OF KOMATIITES AND BASALTS FROM THE DEADMAN HILL AREA, MUNRO TOWNSHIP, ONTARIO, CANADA	DC131	THOLEIITE	48.48	-81.33	2720	0.987594	1522.32	3.39068	50.17	1.48	12.41	15.3	0.27	7.13	8.82	3.9	0.07	0.13
Abitibi	SILICATE-PEROVSKITE AND MAJORITE SIGNATURE KOMATIITES FROM THE ARCHEAN ABITIBI GREENSTONE BELT: IMPLICATIONS FOR EARLY MANTLE DIFFERENTIATION AND STRATIFICATION	mp-22	THOLEIITE	48.47	-81.4	2720	0.969399	1507.62	2.96843	47.7	1.84	12	14.49	0.19	6.78	8.11	1.49	0.89	0.14
Superior	GEOCHEMISTRY OF MUNRO TOWNSHIP BASALTS	P9-159	THOLEIITE	48.6	-80.5	2720	0.999132	1500.87	3.144	50.05	1.48	13.32	14.7	0.18	6.44	7.62	4.1	0.32	0.14
Superior	THE GEOCHEMISTRY OF KOMATIITES AND BASALTS FROM THE DEADMAN HILL AREA, MUNRO TOWNSHIP, ONTARIO, CANADA	NFT4254	THOLEIITE	48.48	-81.33	2720	0.999528	1494.87	2.97048	50.95	1.49	11.99	14.72	0.27	7.26	9.23	3.58	0.06	0.14
Superior	THE GEOCHEMISTRY OF KOMATIITES AND BASALTS FROM THE DEADMAN HILL AREA, MUNRO TOWNSHIP, ONTARIO, CANADA	DC105	BASALT	48.48	-81.33	2720	0.991951	1482.06	3.34415	46.5	0.62	12.87	13.72	0.27	15.03	7.85	2.62	0.21	0.08
Superior	GEOCHEMISTRY OF MUNRO TOWNSHIP BASALTS	P9-157	basalt	48.6	-80.5	2720	0.946607	1469.77	2.77758	50.61	1.36	11.82	14.09	0.2	8.1	8.15	4.07	0.09	0.13
Superior	THE GEOCHEMISTRY OF KOMATIITES AND BASALTS FROM THE DEADMAN HILL AREA, MUNRO TOWNSHIP, ONTARIO, CANADA	NFT5101	THOLEIITE	48.48	-81.33	2720	0.997102	1455.2	2.87604	49.18	1.18	14.95	13.39	0.3	7.29	8.95	3.03	1.32	0.14
Superior	THE GEOCHEMISTRY OF KOMATIITES AND BASALTS FROM THE DEADMAN HILL AREA, MUNRO TOWNSHIP, ONTARIO, CANADA	DC106	BASALT	48.48	-81.33	2720	0.978424	1451.21	2.51821	50.03	0.57	8.7	13.51	0.27	15.07	9.27	2.3	0.04	0.06
Superior	MAGMA MIXING IN KOMATIITIC LAVAS FROM MUNRO TOWNSHIP, ONTARIO	4	BASALT	48.2	-80.1	2720	0.999935	1439.26	2.50858	48.8	0.75	11.4	13.1		14	10.2	1.89
Superior	MAGMA MIXING IN KOMATIITIC LAVAS FROM MUNRO TOWNSHIP, ONTARIO	C84A	BASALT	48.2	-80.1	2720	0.999935	1432.56	2.56535	47.3	0.55	11.3	12.6	0.23	15.2	9.2	1.8	0.13
Superior	GENESIS OF ARCHEAN KOMATIITES FROM MUNRO TOWNSHIP, ONTARIO: TRACE-ELEMENT EVIDENCE	158	THOLEIITE	48.2	-80.1	2720	0.999857	1427.49	2.34729	50.4	1.14	9.5	12.8	0.02	9.1	10.2	3.8	0.03
Superior	GEOCHEMISTRY OF MUNRO TOWNSHIP BASALTS	P9-155	BASALT	48.2	-80.1	2720	0.999816	1425.56	2.48096	46.68	0.55	10.84	12.28	0.2	16.35	10.23	1.16	0.06	0.05
Superior	GEOCHEMISTRY OF MUNRO TOWNSHIP BASALTS	P9-180	BASALT	48.2	-80.1	2720	0.998407	1417.11	2.27004	50.77	0.75	13.94	12.6	0.23	7.28	9.43	3.56	0.09	0.07
Abitibi	SILICATE-PEROVSKITE AND MAJORITE SIGNATURE KOMATIITES FROM THE ARCHEAN ABITIBI GREENSTONE BELT: IMPLICATIONS FOR EARLY MANTLE DIFFERENTIATION AND STRATIFICATION	mp-14	THOLEIITE	48.47	-81.4	2720	0.999699	1404.23	1.82593	49.5	0.886	7.08	12.15	0.24	12.6	11.4	1.28	0.12	0.08
Superior	GEOCHEMISTRY OF MUNRO TOWNSHIP BASALTS	P9-167	BASALT	48.2	-80.1	2720	0.999764	1393.84	1.96352	49.18	0.59	11.98	12.15	0.23	14	8.72	1.42	0.12	0.05
Superior	GEOCHEMISTRY OF MUNRO TOWNSHIP BASALTS	P9-154	BASALT	48.2	-80.1	2720	0.999252	1389.72	2.11154	47.38	0.54	11.04	11.53	0.2	14.99	11.29	1.31	0.04	0.05
Superior	GEOCHEMISTRY OF MUNRO TOWNSHIP BASALTS	C501	BASALT	48.2	-80.1	2720	0.998215	1385.66	1.7622	50.04	0.58	11.78	12.07	0.2	13.25	9.12	1.16	0.06	0.05
Superior	MAGMA MIXING IN KOMATIITIC LAVAS FROM MUNRO TOWNSHIP, ONTARIO	C87A	BASALT	48.2	-80.1	2720	0.999935	1383.22	1.90092	49.6	0.64	13	11.79	0.19	10.6	10.9	1.8	0.06
Superior	GEOCHEMISTRY OF MUNRO TOWNSHIP BASALTS	P9-153	BASALT	48.2	-80.1	2720	0.999482	1378.48	1.8559	49.88	0.6	11.94	11.72	0.19	12.06	10.41	1.8	0.15	0.05
Superior	GEOCHEMISTRY OF MUNRO TOWNSHIP BASALTS	P9-183	BASALT	48.2	-80.1	2720	0.999162	1376.14	1.7108	51.2	0.72	14.03	11.81	0.2	8.57	9.99	1.83	0.16	0.06
Superior	THE GEOCHEMISTRY OF KOMATIITES AND BASALTS FROM THE DEADMAN HILL AREA, MUNRO TOWNSHIP, ONTARIO, CANADA	DC118	BASALT	48.48	-81.33	2720	0.995514	1375.68	1.98169	50.07	0.69	14.02	11.73	0.2	10.75	9.31	2.25	0.68	0.08
Superior	GEOCHEMISTRY OF MUNRO TOWNSHIP BASALTS	P9-178	BASALT	48.2	-80.1	2720	0.996806	1369.68	1.77572	50.14	0.66	13.09	11.51	0.19	10.44	10.26	2.05	0.04	0.06
Superior	GEOCHEMISTRY OF MUNRO TOWNSHIP BASALTS	P9-160	THOLEIITE	48.6	-80.5	2720	0.998754	1369.23	1.83108	51.17	1.12	9.61	11.42	0.18	10.25	11.88	3.18	0.05	0.1
Superior	THE GEOCHEMISTRY OF KOMATIITES AND BASALTS FROM THE DEADMAN HILL AREA, MUNRO TOWNSHIP, ONTARIO, CANADA	NFT5187	BASALT	48.48	-81.33	2720	0.999674	1368.09	1.91152	50.36	0.56	10.86	11.57	0.2	15.75	7.46	2.82	0.13	0.07
Superior	GEOCHEMISTRY OF MUNRO TOWNSHIP BASALTS	P9-172	BASALT	48.2	-80.1	2720	0.999385	1366.9	1.61052	51.42	0.59	12.15	11.74	0.19	11.27	9.13	1.53	0.45	0.06
Superior	GEOCHEMISTRY OF MUNRO TOWNSHIP BASALTS	P9-109	BASALT	48.2	-80.1	2720	0.999712	1362.46	1.64049	51	0.68	13.16	11.52	0.21	9.85	10.1	1.37	0.69	0.06
Superior	MAGMA MIXING IN KOMATIITIC LAVAS FROM MUNRO TOWNSHIP, ONTARIO	C85A	BASALT	48.2	-80.1	2720	0.999935	1357.88	1.54811	51.6	0.65	12.9	11.43	0.19	9.5	10.3	1.79	0.18
Superior	GEOCHEMISTRY OF MUNRO TOWNSHIP BASALTS	P9-179	BASALT	48.2	-80.1	2720	0.99967	1357.71	1.64423	50.94	0.67	13.15	11.29	0.19	9.45	10.48	2.15	0.12	0.06
Superior	GEOCHEMISTRY OF MUNRO TOWNSHIP BASALTS	P9-186	BASALT	48.2	-80.1	2720	0.998444	1357.16	1.62284	50.97	0.63	13.26	11.33	0.2	10.27	9.96	2.01	0.06	0.05
Superior	GEOCHEMISTRY OF MUNRO TOWNSHIP BASALTS	P9-107	BASALT	48.2	-80.1	2720	0.999682	1353.88	1.76898	49.42	0.62	12.78	10.95	0.18	11.6	11.22	2.06	0.08	0.05
Superior	THE GEOCHEMISTRY OF KOMATIITES AND BASALTS FROM THE DEADMAN HILL AREA, MUNRO TOWNSHIP, ONTARIO, CANADA	DC101	BASALT	48.48	-81.33	2720	0.998637	1353.51	1.91181	49.89	0.61	12.74	11.03	0.23	12.11	9.82	3.16	0.12	0.08
Superior	THE GEOCHEMISTRY OF KOMATIITES AND BASALTS FROM THE DEADMAN HILL AREA, MUNRO TOWNSHIP, ONTARIO, CANADA	DC132	THOLEIITE	48.48	-81.33	2720	0.998228	1345.25	1.71504	53.37	0.77	14.49	11.05	0.2	7.07	7.61	4.84	0.25	0.1
Superior	MAGMA MIXING IN KOMATIITIC LAVAS FROM MUNRO TOWNSHIP, ONTARIO	M613	BASALT	48.2	-80.1	2720	0.999935	1338.06	1.68496	48.7	0.68	11.5	10.53	0.19	15	10.1	1.82
Superior	GEOCHEMISTRY OF MUNRO TOWNSHIP BASALTS	P9-223	BASALT	48.2	-80.1	2720	0.998245	1337.03	1.24582	50.13	0.42	8.39	10.6	0.24	14.71	13.57	0.31	0.03	0.04
Superior	GEOCHEMISTRY OF MUNRO TOWNSHIP BASALTS	P9-175	BASALT	48.2	-80.1	2720	0.995014	1334.09	1.65989	50.25	0.76	12.67	10.57	0.19	11.29	9.71	2.97	0.05	0.08
Superior	THE GEOCHEMISTRY OF KOMATIITES AND BASALTS FROM THE DEADMAN HILL AREA, MUNRO TOWNSHIP, ONTARIO, CANADA	DC120	THOLEIITE	48.48	-81.33	2720	0.995194	1333.5	1.4568	52.32	0.73	14.82	10.72	0.19	7.76	10.62	2.26	0.27	0.09
Superior	THE GEOCHEMISTRY OF KOMATIITES AND BASALTS FROM THE DEADMAN HILL AREA, MUNRO TOWNSHIP, ONTARIO, CANADA	DC129	BASALT	48.48	-81.33	2720	0.995633	1327.29	1.47203	52.11	0.63	13.4	10.76	0.16	10.91	8.82	2.47	0.44	0.07
Superior	GEOCHEMISTRY OF MUNRO TOWNSHIP BASALTS	P9-226	BASALT	48.2	-80.1	2720	0.995883	1324.1	1.59248	51.02	0.67	12.2	10.44	0.19	12.2	8.52	3.39	0.09	0.07
Superior	GEOCHEMISTRY OF MUNRO TOWNSHIP BASALTS	P9-225	BASALT	48.2	-80.1	2720	0.999711	1321.72	1.64212	50.63	0.79	13.22	10.15	0.21	9.8	10.22	3.54	0.15	0.06
Superior	THE GEOCHEMISTRY OF KOMATIITES AND BASALTS FROM THE DEADMAN HILL AREA, MUNRO TOWNSHIP, ONTARIO, CANADA	DC127	THOLEIITE	48.48	-81.33	2720	0.999778	1318.56	1.57616	51.97	0.69	14.69	10.25	0.18	8.26	9.66	3.11	0.97	0.08
Superior	GEOCHEMISTRY OF MUNRO TOWNSHIP BASALTS	P9-177	BASALT	48.2	-80.1	2720	0.988457	1316.18	1.53686	50.08	0.71	12.01	10.18	0.17	13.59	8.65	2.8	0.04	0.08
Superior	MAGMA MIXING IN KOMATIITIC LAVAS FROM MUNRO TOWNSHIP, ONTARIO	M615	BASALT	48.2	-80.1	2720	0.999935	1315.91	1.47164	50.9	0.72	12	10.35	0.17	13.9	7.6	2.9
Superior	GEOCHEMISTRY OF MUNRO TOWNSHIP BASALTS	P9-131	BASALT	48.2	-80.1	2720	0.993829	1314.93	1.41833	52.05	0.88	14.43	10.06	0.17	7.51	10.54	3.09	0.09	0.09
Superior	THE GEOCHEMISTRY OF KOMATIITES AND BASALTS FROM THE DEADMAN HILL AREA, MUNRO TOWNSHIP, ONTARIO, CANADA	DC108	BASALT	48.48	-81.33	2720	0.996166	1310.49	1.38083	51.65	0.65	13.44	10.11	0.17	10.08	10.95	1.84	0.8	0.09
Superior	GEOCHEMISTRY OF MUNRO TOWNSHIP BASALTS	P9-174	BASALT	48.2	-80.1	2720	0.996608	1304.59	1.52194	51.97	0.81	14.29	9.8	0.18	7.95	8.8	4.61	0.05	0.08
Superior	MAGMA MIXING IN KOMATIITIC LAVAS FROM MUNRO TOWNSHIP, ONTARIO	M622	BASALT	48.2	-80.1	2720	0.999935	1303.68	1.28788	50	0.6	9.9	9.81	0.16	16.6	9.8	1.5
Superior	THE GEOCHEMISTRY OF KOMATIITES AND BASALTS FROM THE DEADMAN HILL AREA, MUNRO TOWNSHIP, ONTARIO, CANADA	DC116	THOLEIITE	48.48	-81.33	2720	0.997084	1301.56	1.23673	52.75	0.7	14.79	10.02	0.14	8.64	10.18	2.27	0.23	0.08
Superior	GEOCHEMISTRY OF MUNRO TOWNSHIP BASALTS	P9-176	BASALT	48.2	-80.1	2720	0.994316	1301.24	1.50691	49.29	0.71	12.19	9.53	0.17	13.01	11.07	2.6	0.03	0.08
Superior	THE GEOCHEMISTRY OF KOMATIITES AND BASALTS FROM THE DEADMAN HILL AREA, MUNRO TOWNSHIP, ONTARIO, CANADA	DC117	THOLEIITE	48.48	-81.33	2720	0.951393	1296.4	1.26406	52.45	0.68	13.69	9.8	0.18	9.39	10.7	2.42	0.4	0.08
Superior	THE CHARACTERISTICS AND ORIGIN OF THE BIG LAKE MAFIC-ULTRAMAFIC-HOSTED VOLCANOGENIC MASSIVE SULFIDE OCCURRENCE, MARATHON, ONTARIO, CANADA	626477	BASALT	48.6	-86.1	2719	0.999346	1482.09	2.79886	49.03	1.95	9.3	14.15	0.25	9.62	9.08	2.54	0.34	0.11
Superior	THE CHARACTERISTICS AND ORIGIN OF THE BIG LAKE MAFIC-ULTRAMAFIC-HOSTED VOLCANOGENIC MASSIVE SULFIDE OCCURRENCE, MARATHON, ONTARIO, CANADA	39-K	BASALT	48.6	-86.1	2719	0.988342	1451.93	2.72088	47.1	1	6.45	12.81	0.27	16.72	9.42	0.32	2.15	0.07
Superior	THE CHARACTERISTICS AND ORIGIN OF THE BIG LAKE MAFIC-ULTRAMAFIC-HOSTED VOLCANOGENIC MASSIVE SULFIDE OCCURRENCE, MARATHON, ONTARIO, CANADA	626192	BASALT	48.6	-86.1	2719	0.982124	1400.62	2.17959	48.47	0.76	13.88	11.94	0.22	8.23	10.11	1.92	0.94	0.05
Dharwar	GEOCHEMISTRY OF ARCHEAN BIMODAL VOLCANIC ROCKS OF THE SANDUR SUPRACRUSTAL BELT, DHARWAR CRATON, SOUTHERN INDIA	14	THOLEIITE	15	76.7	2719	0.955139	1321.41	1.30857	53.3	1.24	13.8	10.47	0.15	7.29	8.13	3.15	0.12	0.2
Superior	PÉTROLOGIE DES ROCHES VOLCANIQUES DU SILLON DE ROCHES VERTES ARCHÉENNES DE MATAGAMI - CHIBOUGAMU À L^OUEST DE CHAPAIS (ABITIBI EST, QUÉBEC). 2. LE GROUPE HAUTEMENT POTASSIQUE D^OPÉMISCA	6048D	BASALT	49.75	-74.5	2717	0.999539	1287.74	1.58141	50.29	0.75	16.57	9.07	0.13	7.83	10.78	2.99	1.38	0.21
Superior	PÉTROLOGIE DES ROCHES VOLCANIQUES DU SILLON DE ROCHES VERTES ARCHÉENNES DE MATAGAMI - CHIBOUGAMU À L^OUEST DE CHAPAIS (ABITIBI EST, QUÉBEC). 2. LE GROUPE HAUTEMENT POTASSIQUE D^OPÉMISCA	6062D	BASALT	49.75	-74.5	2717	0.999955	1270.71	1.35767	49.79	0.73	16.61	8.78	0.16	9.85	11.01	2.2	0.6	0.26
Abitibi	RE-OS SYSTEMATICS OF KOMATIITES AND KOMATIITIC BASALTS AT DUNDONALD BEACH, ONTARIO, CANADA: EVIDENCE FOR A COMPLEX ALTERATION HISTORY AND IMPLICATIONS OF A LATE-ARCHEAN CHONDRITIC MANTLE SOURCE	DUNBCH-9	BASALT	48.2	-80.1	2714.5	0.999935	1386.39	2.04103	47.8	0.56	12.7	11.61	0.22	12.5	11.6	0.36	1.1	0.04
Abitibi	RE-OS SYSTEMATICS OF KOMATIITES AND KOMATIITIC BASALTS AT DUNDONALD BEACH, ONTARIO, CANADA: EVIDENCE FOR A COMPLEX ALTERATION HISTORY AND IMPLICATIONS OF A LATE-ARCHEAN CHONDRITIC MANTLE SOURCE	DUNBCH-10	BASALT	48.2	-80.1	2714.5	0.999935	1378.91	1.85844	47.9	0.56	12	11.34	0.21	12.2	13.7	0.01	0.74	0.04
Abitibi	RE-OS SYSTEMATICS OF KOMATIITES AND KOMATIITIC BASALTS AT DUNDONALD BEACH, ONTARIO, CANADA: EVIDENCE FOR A COMPLEX ALTERATION HISTORY AND IMPLICATIONS OF A LATE-ARCHEAN CHONDRITIC MANTLE SOURCE	DUNBCH-8	BASALT	48.2	-80.1	2714.5	0.999935	1355.52	1.78332	50.5	0.64	14.6	11.07	0.18	8.4	10.2	2.06	1.06	0.05
Abitibi	RE-OS SYSTEMATICS OF KOMATIITES AND KOMATIITIC BASALTS AT DUNDONALD BEACH, ONTARIO, CANADA: EVIDENCE FOR A COMPLEX ALTERATION HISTORY AND IMPLICATIONS OF A LATE-ARCHEAN CHONDRITIC MANTLE SOURCE	DUNBCH-14	BASALT	48.2	-80.1	2714.5	0.999935	1352.33	1.77497	48.7	0.56	13.7	10.71	0.21	9.2	13.5	0.15	1.93	0.04
Abitibi	RE-OS SYSTEMATICS OF KOMATIITES AND KOMATIITIC BASALTS AT DUNDONALD BEACH, ONTARIO, CANADA: EVIDENCE FOR A COMPLEX ALTERATION HISTORY AND IMPLICATIONS OF A LATE-ARCHEAN CHONDRITIC MANTLE SOURCE	DUNBCH-13	BASALT	48.2	-80.1	2714.5	0.999935	1347.43	1.62138	49.2	0.44	10.2	10.8	0.22	14.7	11.6	0.73	0.74	0.03
Abitibi	RE-OS SYSTEMATICS OF KOMATIITES AND KOMATIITIC BASALTS AT DUNDONALD BEACH, ONTARIO, CANADA: EVIDENCE FOR A COMPLEX ALTERATION HISTORY AND IMPLICATIONS OF A LATE-ARCHEAN CHONDRITIC MANTLE SOURCE	DUNBCH-7	BASALT	48.2	-80.1	2714.5	0.999935	1325.26	1.42369	50.3	0.55	11.7	10.44	0.22	12.6	11.2	0.97	0.75	0.04
Abitibi	RE-OS SYSTEMATICS OF KOMATIITES AND KOMATIITIC BASALTS AT DUNDONALD BEACH, ONTARIO, CANADA: EVIDENCE FOR A COMPLEX ALTERATION HISTORY AND IMPLICATIONS OF A LATE-ARCHEAN CHONDRITIC MANTLE SOURCE	DUNBCH-15	BASALT	48.2	-80.1	2714.5	0.999296	1315.31	1.53882	49.2	0.56	13.3	9.99	0.2	12	11.3	0.38	1.89	0.03
Kaapvaal	THE GEOLOGY AND GEOCHEMISTRY OF THE VENTERSDORP SUPERGROUP IN THE AREA BETWEEN VRYBURG, OTTOSDAL AND MAFIKENG	NKV074	BASALT	-25.87	24.73	2714	0.993392	1448.53	2.44243	51.01	1.06	14.77	13.92	0.32	7.85	6.91	0.39	3.2	0.32
Kaapvaal	THE GEOLOGY AND GEOCHEMISTRY OF THE VENTERSDORP SUPERGROUP IN THE AREA BETWEEN VRYBURG, OTTOSDAL AND MAFIKENG	NKV004	BASALT	-25.87	24.73	2714	0.99993	1346.81	1.72559	52.29	0.44	13.41	10.99	0.17	8.05	10.14	2.5	1.72	0.08
Kaapvaal Craton	PETROGENESIS OF LATE ARCHEAN FLOOD-TYPE BASIC LAVAS FROM THE KLIPRIVIERSBERG GROUP, VENTERSDORP SUPERGROUP, SOUTH AFRICA	KL-138	BASALT	-26.87	26.67	2714	0.983611	1343.67	1.77617	51.82	0.69	15.13	10.75	0.2	6.84	8.46	3.37	1.46	0.087
Kaapvaal Craton	PETROGENESIS OF LATE ARCHEAN FLOOD-TYPE BASIC LAVAS FROM THE KLIPRIVIERSBERG GROUP, VENTERSDORP SUPERGROUP, SOUTH AFRICA	KA-452	BASALT	-26.87	26.67	2714	0.99978	1343.27	1.35026	53.91	1.05	13.76	11.07	0.15	6.57	9.52	2.23	0.38	0.139
Kaapvaal Craton	PETROGENESIS OF LATE ARCHEAN FLOOD-TYPE BASIC LAVAS FROM THE KLIPRIVIERSBERG GROUP, VENTERSDORP SUPERGROUP, SOUTH AFRICA	KL-153	BASALT	-26.87	26.67	2714	0.998043	1341.65	1.79564	52.25	0.74	15.38	10.89	0.23	7.11	6.29	3.31	2.49	0.102
Kaapvaal	THE GEOLOGY AND GEOCHEMISTRY OF THE VENTERSDORP SUPERGROUP IN THE AREA BETWEEN VRYBURG, OTTOSDAL AND MAFIKENG	NKV028	BASALT	-25.87	24.73	2714	0.994476	1325.48	1.20509	53.57	0.34	9.74	10.97	0.13	14.38	8.63	1.18	0.86	0.14
Kaapvaal	THE GEOLOGY AND GEOCHEMISTRY OF THE VENTERSDORP SUPERGROUP IN THE AREA BETWEEN VRYBURG, OTTOSDAL AND MAFIKENG	NKV005	BASALT	-25.87	24.73	2714	0.995883	1325.33	1.4492	52.23	0.32	10.78	10.76	0.14	14.07	8.38	1.2	1.87	0.07
Kaapvaal Craton	PETROGENESIS OF LATE ARCHEAN FLOOD-TYPE BASIC LAVAS FROM THE KLIPRIVIERSBERG GROUP, VENTERSDORP SUPERGROUP, SOUTH AFRICA	KL-141	BASALT	-26.87	26.67	2714	0.998576	1319.07	1.37963	52.54	0.57	11.87	10.52	0.18	10.6	9.21	1.58	1.68	0.078
Kaapvaal Craton	PETROGENESIS OF LATE ARCHEAN FLOOD-TYPE BASIC LAVAS FROM THE KLIPRIVIERSBERG GROUP, VENTERSDORP SUPERGROUP, SOUTH AFRICA	KL-135	BASALT	-26.87	26.67	2714	0.970382	1316.84	1.16857	53.1	0.49	10.35	10.69	0.18	13.62	8.29	1.85	0.18	0.046
Southern Volcanic Zone, Superior Province	PHYSICAL VOLCANOLOGY, STRATIGRAPHY, AND LITHOGEOCHEMISTRY OF AN ARCHEAN VOLCANIC ARC: EVOLUTION FROM PLUME-RELATED VOLCANISM TO ARC RIFTING OF SE ABITIBI GREENSTONE BELT, VAL D^OR, CANADA	CS99-2193A	BASALT	48.12	-77.77	2714	0.985673	1315.57	1.52501	48.4	0.45	14.6	9.9	0.15	10.5	9.9	2.13	0.05	0.09
Kaapvaal Craton	PETROGENESIS OF LATE ARCHEAN FLOOD-TYPE BASIC LAVAS FROM THE KLIPRIVIERSBERG GROUP, VENTERSDORP SUPERGROUP, SOUTH AFRICA	KL-146	BASALT	-26.87	26.67	2714	0.995685	1296.73	1.36092	51.77	0.52	12.72	9.97	0.19	12.87	7.19	1.98	1.6	0.078
Kaapvaal Craton	PETROGENESIS OF LATE ARCHEAN FLOOD-TYPE BASIC LAVAS FROM THE KLIPRIVIERSBERG GROUP, VENTERSDORP SUPERGROUP, SOUTH AFRICA	KL-154	BASALT	-26.87	26.67	2714	0.995513	1282.98	1.15457	53.59	0.48	12.73	9.71	0.18	10.75	7.75	2.16	1.52	0.07
Abitibi	A 2.7 GA DEPLETED THOLEIITE SUITE: EVIDENCE OF PLUME-ARC INTERACTION IN THE ABITIBI GREENSTONE BELT, CANADA	V44-3	THOLEIITE	48.12	-77.77	2713.5	0.972293	1320.21	1.4105	50.34	0.46	18.04	10.66	0.18	10.91	6.46	0.05	1.82	0.03
Yilgarn	THE GEOLOGY AND PETROGENESIS OF A GREENSTONE BELT AND RELATED NICKEL SULFIDE MINERALIZATION AT YAKABINDIE, WESTERN AUSTRALIA	537	BASALT	-27.58	120.57	2712.5	0.999935	1430.97	2.32451	49.61	0.88	14.99	12.7	0.21	6.25	11.63	2.08	0.19
Yilgarn	THE GEOLOGY AND PETROGENESIS OF A GREENSTONE BELT AND RELATED NICKEL SULFIDE MINERALIZATION AT YAKABINDIE, WESTERN AUSTRALIA	176	BASALT	-27.5	120.6	2712.5	0.99911	1417.59	2.10537	51.42	0.95	14.97	12.84	0.21	6.85	8.61	2.75	0.17
western Melville Peninsula, Canada	GEOCHEMISTRY AND ORIGIN OF THE ARCHEAN PRINCE ALBERT GROUP VOLCANICS, WESTERN MELVILLE PENINSULA, NORTHWEST TERRITORIES, CANADA	6	BASALT	68	-85	2712.5	0.999544	1407.11	2.28027	48	0.91	14.93	12.11	0.21	9.18	10.18	2.08	0.25	0.07
Yilgarn	THE GEOLOGY AND PETROGENESIS OF A GREENSTONE BELT AND RELATED NICKEL SULFIDE MINERALIZATION AT YAKABINDIE, WESTERN AUSTRALIA	162	BASALT	-27.5	120.6	2712.5	0.999767	1401.24	2.01113	50.49	0.96	14.84	12.28	0.24	7.28	9.86	2.31	0.14
Yilgarn	THE GEOLOGY AND PETROGENESIS OF A GREENSTONE BELT AND RELATED NICKEL SULFIDE MINERALIZATION AT YAKABINDIE, WESTERN AUSTRALIA	539	BASALT	-27.58	120.57	2712.5	0.999935	1391.17	1.75062	52.5	0.88	14.27	12.28	0.2	6.91	9.52	1.89	0.45
Yilgarn	THE GEOLOGY AND PETROGENESIS OF A GREENSTONE BELT AND RELATED NICKEL SULFIDE MINERALIZATION AT YAKABINDIE, WESTERN AUSTRALIA	541	BASALT	-27.58	120.57	2712.5	0.999935	1389.16	1.98519	49.45	1.05	15.34	11.66	0.23	6.92	12.56	1.69	0.19
Yilgarn	THE GEOLOGY AND PETROGENESIS OF A GREENSTONE BELT AND RELATED NICKEL SULFIDE MINERALIZATION AT YAKABINDIE, WESTERN AUSTRALIA	542	BASALT	-27.58	120.57	2712.5	0.999935	1386.55	1.93624	50.03	1.01	15.22	11.76	0.2	7.22	11.05	2.07	0.14
Yilgarn	THE GEOLOGY AND PETROGENESIS OF A GREENSTONE BELT AND RELATED NICKEL SULFIDE MINERALIZATION AT YAKABINDIE, WESTERN AUSTRALIA	506	BASALT	-28.08	120.52	2712.5	0.999935	1384.98	1.62412	52.86	0.81	13.92	12.05	0.19	6.53	9.64	1.9	0.21
Yilgarn	THE GEOLOGY AND PETROGENESIS OF A GREENSTONE BELT AND RELATED NICKEL SULFIDE MINERALIZATION AT YAKABINDIE, WESTERN AUSTRALIA	531	BASALT	-27.58	120.57	2712.5	0.999935	1384.42	1.84068	50.03	1.03	15.6	11.6	0.21	6.85	13.77	1.02	0.12
Yilgarn	THE GEOLOGY AND PETROGENESIS OF A GREENSTONE BELT AND RELATED NICKEL SULFIDE MINERALIZATION AT YAKABINDIE, WESTERN AUSTRALIA	530	BASALT	-27.58	120.57	2712.5	0.998829	1381.59	1.92527	50.06	1.13	15.48	11.49	0.24	6.5	12.57	1.97	0.16
Yilgarn	THE GEOLOGY AND PETROGENESIS OF A GREENSTONE BELT AND RELATED NICKEL SULFIDE MINERALIZATION AT YAKABINDIE, WESTERN AUSTRALIA	505	BASALT	-28.08	120.52	2712.5	0.999935	1375.75	1.50228	53.61	0.81	13.48	12	0.18	6.91	9.8	1.74	0.22
Yilgarn	THE GEOLOGY AND PETROGENESIS OF A GREENSTONE BELT AND RELATED NICKEL SULFIDE MINERALIZATION AT YAKABINDIE, WESTERN AUSTRALIA	168	BASALT	-27.5	120.6	2712.5	0.999935	1366.36	1.80167	50.67	0.95	15.36	11.46	0.22	8.12	9.75	2.24	0.4
western Melville Peninsula, Canada	GEOCHEMISTRY AND ORIGIN OF THE ARCHEAN PRINCE ALBERT GROUP VOLCANICS, WESTERN MELVILLE PENINSULA, NORTHWEST TERRITORIES, CANADA	7	BASALT	68	-85	2712.5	0.967863	1364.46	1.88843	49.12	0.9	15.06	11.08	0.21	8.11	11.24	2.38	0.11	0.06
Yilgarn	THE GEOLOGY AND PETROGENESIS OF A GREENSTONE BELT AND RELATED NICKEL SULFIDE MINERALIZATION AT YAKABINDIE, WESTERN AUSTRALIA	501	BASALT	-28.08	120.52	2712.5	0.999935	1363.46	1.39098	53.43	0.75	14.05	11.55	0.19	6.56	10.3	1.46	0.12
Yilgarn	THE GEOLOGY AND PETROGENESIS OF A GREENSTONE BELT AND RELATED NICKEL SULFIDE MINERALIZATION AT YAKABINDIE, WESTERN AUSTRALIA	116	BASALT	-27.5	120.6	2712.5	0.999935	1361.6	1.69352	52.18	0.58	12.14	11.58	0.21	10.52	9.32	2.91	0.14
Yilgarn	THE GEOLOGY AND PETROGENESIS OF A GREENSTONE BELT AND RELATED NICKEL SULFIDE MINERALIZATION AT YAKABINDIE, WESTERN AUSTRALIA	177	BASALT	-27.5	120.6	2712.5	0.999935	1359.41	1.75193	49.66	0.62	13.95	11.15	0.23	10.44	11.93	1.56	0.13
Yilgarn	THE GEOLOGY AND PETROGENESIS OF A GREENSTONE BELT AND RELATED NICKEL SULFIDE MINERALIZATION AT YAKABINDIE, WESTERN AUSTRALIA	139	BASALT	-27.5	120.6	2712.5	0.999726	1353.83	1.67819	51.13	0.57	11.77	11.19	0.2	11.09	10.38	2.59	0.11
western Melville Peninsula, Canada	GEOCHEMISTRY AND ORIGIN OF THE ARCHEAN PRINCE ALBERT GROUP VOLCANICS, WESTERN MELVILLE PENINSULA, NORTHWEST TERRITORIES, CANADA	5	BASALT	68	-85	2712.5	0.985392	1353.72	1.55933	52.3	0.95	11.84	11.13	0.21	7.65	11.3	2.77	0.08	0.07
Yilgarn	THE GEOLOGY AND PETROGENESIS OF A GREENSTONE BELT AND RELATED NICKEL SULFIDE MINERALIZATION AT YAKABINDIE, WESTERN AUSTRALIA	500	BASALT	-28.08	120.52	2712.5	0.999767	1339.05	1.25061	53.61	0.7	14	10.93	0.18	6.79	10.09	1.73	0.11
Yilgarn	THE GEOLOGY AND PETROGENESIS OF A GREENSTONE BELT AND RELATED NICKEL SULFIDE MINERALIZATION AT YAKABINDIE, WESTERN AUSTRALIA	169	BASALT	-27.5	120.6	2712.5	0.999935	1320.29	1.43875	51.88	0.79	14.37	10.32	0.2	8.16	10.43	2.35	0.59
Yilgarn	THE GEOLOGY AND PETROGENESIS OF A GREENSTONE BELT AND RELATED NICKEL SULFIDE MINERALIZATION AT YAKABINDIE, WESTERN AUSTRALIA	157	BASALT	-27.5	120.6	2712.5	0.999935	1293.84	1.1592	51.36	0.7	15.44	9.54	0.22	8.32	12.54	1.24	0.11
Yilgarn	THE GEOLOGY AND PETROGENESIS OF A GREENSTONE BELT AND RELATED NICKEL SULFIDE MINERALIZATION AT YAKABINDIE, WESTERN AUSTRALIA	163	BASALT	-27.5	120.6	2712.5	0.999726	1269.38	1.09695	53.1	0.93	14.4	9.03	0.23	8.15	11.07	2.57	0.37
Yilgarn	THE GEOLOGY AND PETROGENESIS OF A GREENSTONE BELT AND RELATED NICKEL SULFIDE MINERALIZATION AT YAKABINDIE, WESTERN AUSTRALIA	154	BASALT	-27.5	120.6	2712.5	0.999935	1246.62	0.994792	51.99	0.51	15.27	8.4	0.16	9.68	11.65	2.07	0.19
Yilgarn, WESTERN AUSTRALIA	ARCHEAN BASIC VOLCANISM IN THE EASTERN GOLDFIELDS PROVINCE, YILGARN BLOCK, WESTERN AUSTRALIA	29	BASALT	-30.8	121.5	2711.5	0.999458	1481.38	2.90601	46.7	0.73	13.63	13.95	0.33	11.78	10.02	0.36	0.65	0.08
Yilgarn, WESTERN AUSTRALIA	ARCHEAN BASIC VOLCANISM IN THE EASTERN GOLDFIELDS PROVINCE, YILGARN BLOCK, WESTERN AUSTRALIA	30	BASALT	-31.2	121.67	2711.5	0.99928	1445.98	2.37988	48.7	0.77	15.8	13.59	0.23	9.97	8.2	1.23	0.04	0.09
Yilgarn, WESTERN AUSTRALIA	ARCHEAN BASIC VOLCANISM IN THE EASTERN GOLDFIELDS PROVINCE, YILGARN BLOCK, WESTERN AUSTRALIA	2	BASALT	-31.2	121.67	2711.5	0.994483	1406.63	2.2906	49	0.91	14.4	12.01	0.2	7.24	10.24	3.26	0.13	0.07
Yilgarn, WESTERN AUSTRALIA	ARCHEAN BASIC VOLCANISM IN THE EASTERN GOLDFIELDS PROVINCE, YILGARN BLOCK, WESTERN AUSTRALIA	3	BASALT	-31.2	121.67	2711.5	0.997175	1379.9	1.93497	49.4	0.91	15	11.51	0.2	7.75	11.32	2.09	0.12	0.07
Yilgarn, WESTERN AUSTRALIA	ARCHEAN BASIC VOLCANISM IN THE EASTERN GOLDFIELDS PROVINCE, YILGARN BLOCK, WESTERN AUSTRALIA	1	BASALT	-31.2	121.67	2711.5	0.983841	1376.5	1.94227	49.5	0.89	15.3	11.36	0.21	7.23	11.98	2.21	0.15	0.08
Yilgarn	MAGNESIAN DYKE SUITES OF THE 2.7 GA KAMBALDA SEQUENCE, WESTERN AUSTRALIA: EVIDENCE FOR COEVAL MELTING OF PLUME ASTHENOSPHERE AND METASOMATISED LITHOSPHERIC MANTLE	MRD001-2	BASALT	-32.2	121.77	2711.5	0.950696	1349.18	1.43811	47.81	0.5	10.12	10.82	0.2	16.53	7.3	0.26	0.24	0.04
Yilgarn, WESTERN AUSTRALIA	ARCHEAN BASIC VOLCANISM IN THE EASTERN GOLDFIELDS PROVINCE, YILGARN BLOCK, WESTERN AUSTRALIA	11	BASALT	-31.2	121.67	2711.5	0.998667	1336.86	1.48681	50.9	0.69	14.3	10.63	0.2	8.33	11.32	1.89	0.12	0.06
Yilgarn, WESTERN AUSTRALIA	ARCHEAN BASIC VOLCANISM IN THE EASTERN GOLDFIELDS PROVINCE, YILGARN BLOCK, WESTERN AUSTRALIA	10	BASALT	-31.2	121.67	2711.5	0.98105	1335.07	1.46267	50.6	0.68	14.2	10.54	0.2	8.65	12.16	1.57	0.07	0.06
Yilgarn, WESTERN AUSTRALIA	ARCHEAN BASIC VOLCANISM IN THE EASTERN GOLDFIELDS PROVINCE, YILGARN BLOCK, WESTERN AUSTRALIA	9	BASALT	-31.2	121.67	2711.5	0.989273	1332.17	1.3926	51.6	0.67	14.4	10.62	0.19	8.03	11.5	1.72	0.11	0.06
Yilgarn, WESTERN AUSTRALIA	ARCHEAN BASIC VOLCANISM IN THE EASTERN GOLDFIELDS PROVINCE, YILGARN BLOCK, WESTERN AUSTRALIA	22	BASALT	-31.2	121.67	2711.5	0.998628	1307.88	1.14616	52.7	0.61	12.59	10.28	0.18	10.29	9.63	1.55	0.41	0.06
Yilgarn, WESTERN AUSTRALIA	ARCHEAN BASIC VOLCANISM IN THE EASTERN GOLDFIELDS PROVINCE, YILGARN BLOCK, WESTERN AUSTRALIA	21	BASALT	-31.2	121.67	2711.5	0.988823	1306.83	1.148	52.3	0.59	12.42	10.12	0.18	9.77	10.39	1.46	0.46	0.06
Yilgarn, WESTERN AUSTRALIA	ARCHEAN BASIC VOLCANISM IN THE EASTERN GOLDFIELDS PROVINCE, YILGARN BLOCK, WESTERN AUSTRALIA	20	BASALT	-30.8	121.5	2711.5	0.993661	1306.23	1.28973	51.8	0.58	11.82	10.19	0.18	12.29	8.26	1.97	0.82	0.07
Yilgarn, WESTERN AUSTRALIA	ARCHEAN BASIC VOLCANISM IN THE EASTERN GOLDFIELDS PROVINCE, YILGARN BLOCK, WESTERN AUSTRALIA	24	BASALT	-30.8	121.5	2711.5	0.998237	1283.48	1.01583	53.8	0.65	13.36	9.55	0.17	8.26	9.82	1.65	0.95	0.07
Yilgarn, WESTERN AUSTRALIA	ARCHEAN MAFIC AND ULTRAMAFIC ROCK ASSOCIATIONS IN THE EASTERN GOLDFIELDS REGION, WESTERN AUSTRALIA	6	BASALT	-30.8	121.5	2711.5	0.999938	1274.94	0.997695	52.8	0.6	13.4	9.38	0.16	9.8	9.1	1.9	0.43	0.12
Yilgarn, WESTERN AUSTRALIA	ARCHEAN BASIC VOLCANISM IN THE EASTERN GOLDFIELDS PROVINCE, YILGARN BLOCK, WESTERN AUSTRALIA	32	BASALT	-31.2	121.67	2711.5	0.988301	1242.08	0.976561	53.7	0.75	16.4	8.34	0.13	7.4	7.78	3.69	0.09	0.07
western Churchill Province	PETROGENESIS OF NEOARCHAEAN VOLCANIC ROCKS OF THE MACQUOID SUPRACRUSTAL BELT: A BACK-ARC SETTING FOR THE NORTHWESTERN HEARNE SUBDOMAIN, WESTERN CHURCHILL PROVINCE, CANADA	98J131B	BASALT	62	-92	2710	0.991145	1354.37	1.71215	48	0.63	15.3	10.62	0.19	8.1	13.51	1	0.16	0.05
Yilgarn	GEOCHEMISTRY OF COEXISTING DEPLETED AND ENRICHED PARINGA BASALTS, IN THE 2.7 GA KALGOORLIE TERRANE, YILGARN CRATON, WESTERN AUSTRALIA: EVIDENCE FOR A HETEROGENEOUS MANTLE PLUME EVENT	SE10-5	BASALT	-31.2	121.67	2710	0.980054	1326.36	1.3177	50.4	0.62	11.95	10.53	0.18	11.61	8.51	1.51	0.27	0.07
Yilgarn	GEOCHEMISTRY OF COEXISTING DEPLETED AND ENRICHED PARINGA BASALTS, IN THE 2.7 GA KALGOORLIE TERRANE, YILGARN CRATON, WESTERN AUSTRALIA: EVIDENCE FOR A HETEROGENEOUS MANTLE PLUME EVENT	SE10-3	BASALT	-31.2	121.67	2710	0.993632	1313.25	1.211	49.96	0.51	10.72	10.14	0.18	12.69	8.81	0.61	1	0.06
Yilgarn	GEOCHEMISTRY OF COEXISTING DEPLETED AND ENRICHED PARINGA BASALTS, IN THE 2.7 GA KALGOORLIE TERRANE, YILGARN CRATON, WESTERN AUSTRALIA: EVIDENCE FOR A HETEROGENEOUS MANTLE PLUME EVENT	CD339W3-7	BASALT	-31.2	121.67	2710	0.99702	1312.12	1.08217	50.46	0.43	8.68	10.22	0.19	16.55	6.78	0.41	0.8	0.04
Yilgarn	GEOCHEMISTRY OF COEXISTING DEPLETED AND ENRICHED PARINGA BASALTS, IN THE 2.7 GA KALGOORLIE TERRANE, YILGARN CRATON, WESTERN AUSTRALIA: EVIDENCE FOR A HETEROGENEOUS MANTLE PLUME EVENT	KD330-1	BASALT	-31.2	121.67	2710	0.990771	1305.49	1.13276	51.22	0.61	12.56	10.04	0.16	9.78	7.53	1.89	0.32	0.06
Yilgarn	GEOCHEMISTRY OF COEXISTING DEPLETED AND ENRICHED PARINGA BASALTS, IN THE 2.7 GA KALGOORLIE TERRANE, YILGARN CRATON, WESTERN AUSTRALIA: EVIDENCE FOR A HETEROGENEOUS MANTLE PLUME EVENT	SE13-3	BASALT	-31.2	121.67	2710	0.944501	1303.35	1.1782	52.5	0.69	14.05	9.85	0.17	7.19	9.4	2.21	0.48	0.07
Yilgarn	GEOCHEMISTRY OF COEXISTING DEPLETED AND ENRICHED PARINGA BASALTS, IN THE 2.7 GA KALGOORLIE TERRANE, YILGARN CRATON, WESTERN AUSTRALIA: EVIDENCE FOR A HETEROGENEOUS MANTLE PLUME EVENT	CD339W3-6	BASALT	-31.2	121.67	2710	0.992576	1300.4	0.965651	51.48	0.41	8.41	10.05	0.18	16.98	6.52	1.11	0.13	0.04
Yilgarn	GEOCHEMISTRY OF COEXISTING DEPLETED AND ENRICHED PARINGA BASALTS, IN THE 2.7 GA KALGOORLIE TERRANE, YILGARN CRATON, WESTERN AUSTRALIA: EVIDENCE FOR A HETEROGENEOUS MANTLE PLUME EVENT	SE13-4	BASALT	-31.2	121.67	2710	0.970597	1299.18	1.11551	52.28	0.65	13.25	9.79	0.17	7.95	9.73	1.66	0.69	0.07
Yilgarn	GEOCHEMISTRY OF COEXISTING DEPLETED AND ENRICHED PARINGA BASALTS, IN THE 2.7 GA KALGOORLIE TERRANE, YILGARN CRATON, WESTERN AUSTRALIA: EVIDENCE FOR A HETEROGENEOUS MANTLE PLUME EVENT	KD330-4	BASALT	-31.2	121.67	2710	0.997369	1298.25	1.27357	51.88	0.6	12.5	9.9	0.17	10.47	7.87	2.71	0.68	0.06
Yilgarn	GEOCHEMISTRY OF COEXISTING DEPLETED AND ENRICHED PARINGA BASALTS, IN THE 2.7 GA KALGOORLIE TERRANE, YILGARN CRATON, WESTERN AUSTRALIA: EVIDENCE FOR A HETEROGENEOUS MANTLE PLUME EVENT	SE13-22D	BASALT	-31.2	121.67	2710	0.96844	1293.29	0.926906	52.14	0.49	9.85	9.93	0.19	13.64	7.32	0.93	0.62	0.05
western Churchill Province	PETROGENESIS OF NEOARCHAEAN VOLCANIC ROCKS OF THE MACQUOID SUPRACRUSTAL BELT: A BACK-ARC SETTING FOR THE NORTHWESTERN HEARNE SUBDOMAIN, WESTERN CHURCHILL PROVINCE, CANADA	98H058	BASALT	62	-92	2710	0.994754	1239.99	1.13783	48.51	0.45	18.01	7.38	0.19	6.83	15.14	1.81	0.28	0.05
Superior	EVOLUTION OF THE SOUTH-CENTRAL SEGMENT OF THE ARCHEAN ABITIBI BELT, QUEBEC. PART III: PLUTONIC AND METAMORPHIC EVOLUTION AND GEOTECTONIC MODEL	7B	pillow lava	47.5	-78	2706.5	0.999923	1467.67	2.72129	45.59	0.91	16.14	13.44		8.83	8.47	0.8	0.37	0.33
Superior	EVOLUTION OF THE SOUTH-CENTRAL SEGMENT OF THE ARCHEAN ABITIBI BELT, QUEBEC. PART III: PLUTONIC AND METAMORPHIC EVOLUTION AND GEOTECTONIC MODEL	1A	pillow lava	47.5	-78	2706.5	0.999871	1438.69	1.74904	50.53	0.79	8.5	13.14		8.32	10.97	0.23	0.18	0.51
Abitibi	SILICATE-PEROVSKITE AND MAJORITE SIGNATURE KOMATIITES FROM THE ARCHEAN ABITIBI GREENSTONE BELT: IMPLICATIONS FOR EARLY MANTLE DIFFERENTIATION AND STRATIFICATION	T8	THOLEIITE	48.47	-81.4	2706.5	0.999404	1412.41	2.27905	45.7	0.534	14.8	11.43	0.4	6.1	11.4	1.87	0.05	0.06
Superior	EVOLUTION OF THE SOUTH-CENTRAL SEGMENT OF THE ARCHEAN ABITIBI BELT, QUEBEC. PART III: PLUTONIC AND METAMORPHIC EVOLUTION AND GEOTECTONIC MODEL	9B	pillow lava	47.5	-78	2706.5	0.999871	1406.72	1.99552	48.22	0.82	15.22	12.12		7.41	10.06	0.74	0.64	0.39
Superior	EVOLUTION OF THE SOUTH-CENTRAL SEGMENT OF THE ARCHEAN ABITIBI BELT, QUEBEC. PART III: PLUTONIC AND METAMORPHIC EVOLUTION AND GEOTECTONIC MODEL	7A	pillow lava	47.5	-78	2706.5	0.999923	1404.28	1.93963	48.61	0.85	15.06	12.28		8.34	8.85	1.01	0.39	0.26
Superior	EVOLUTION OF THE SOUTH-CENTRAL SEGMENT OF THE ARCHEAN ABITIBI BELT, QUEBEC. PART III: PLUTONIC AND METAMORPHIC EVOLUTION AND GEOTECTONIC MODEL	8A	pillow lava	47.5	-78	2706.5	0.999923	1397.55	1.70456	50.06	0.84	14.89	12.29		7.83	7.09	1.18	0.28	0.28
Superior	EVOLUTION OF THE SOUTH-CENTRAL SEGMENT OF THE ARCHEAN ABITIBI BELT, QUEBEC. PART III: PLUTONIC AND METAMORPHIC EVOLUTION AND GEOTECTONIC MODEL	8B	pillow lava	47.5	-78	2706.5	0.999871	1379.53	1.76649	48.19	0.8	14.92	11.41		7.66	10.52	0.91	0.32	0.4
Superior	EVOLUTION OF THE SOUTH-CENTRAL SEGMENT OF THE ARCHEAN ABITIBI BELT, QUEBEC. PART III: PLUTONIC AND METAMORPHIC EVOLUTION AND GEOTECTONIC MODEL	3	pillow lava	47.5	-78	2706.5	0.999935	1283.38	1.04417	51.2	0.6	16.95	9.18		6.55	8.5	1.55	0.35	0.05
Superior	EVOLUTION OF THE SOUTH-CENTRAL SEGMENT OF THE ARCHEAN ABITIBI BELT, QUEBEC. PART III: PLUTONIC AND METAMORPHIC EVOLUTION AND GEOTECTONIC MODEL	4	pillow lava	47.5	-78	2706.5	0.999935	1278.02	0.986782	50	0.45	16.05	8.95		7	9.55	0.4	0.94	0.05
Shandong	GEOCHEMISTRY OF ~2.7 GA BASALTS FROM TAISHAN AREA: CONSTRAINTS ON THE EVOLUTION OF EARLY NEOARCHEAN GRANITE-GREENSTONE BELT IN WESTERN SHANDONG PROVINCE, CHINA	T1018	THOLEIITE	36.43	117.28	2706	0.947388	1468.6	2.42305	49.6	1	14	14.11	0.2	8.1	7.3	1.7	0.1	0.1
Yilgarn Block	GEOCHEMISTRY OF ARCHEAN VOLCANIC BELTS IN THE EASTERN GOLDFIELDS REGION OF WESTERN AUSTRALIA	63268	BASALT	-31.4633	121.553	2705	0.998765	1490.81	3.02002	47.53	1.38	11.89	14.1	0.23	9.74	12.09	1.43	0.18	0.25
Yilgarn Block	GEOCHEMISTRY OF ARCHEAN VOLCANIC BELTS IN THE EASTERN GOLDFIELDS REGION OF WESTERN AUSTRALIA	63353	tholeiitic pillow basalt	-30	121.5	2705	0.999938	1433.69	2.58502	46.94	0.64	14.24	12.59	0.32	9.46	11.05	1.43	0.77	0.14
Yilgarn Block	GEOCHEMISTRY OF ARCHEAN VOLCANIC BELTS IN THE EASTERN GOLDFIELDS REGION OF WESTERN AUSTRALIA	63322	tholeiitic pillow basalt	-30	121.5	2705	0.999923	1419.99	2.44675	47.65	1.16	15.66	12.35	0.25	7.91	10.39	0.58	2.09	0.26
Abitibi	THE GEOCHEMISTRY AND EVOLUTION OF THE VOLCANIC ROCKS OF THE CHIBOUGAMAU REGION OF THE ABITIBI METAVOLCANIC BELT	2	BASALT	48	-78	2705	0.999261	1416.73	2.14261	49.73	1.24	14.62	12.64		7.39	8.2	2.62	0.13	0.11
Yilgarn Block	GEOCHEMISTRY OF ARCHEAN VOLCANIC BELTS IN THE EASTERN GOLDFIELDS REGION OF WESTERN AUSTRALIA	63351	tholeiitic pillow basalt	-30	121.5	2705	0.999938	1407.88	2.10816	50.53	0.68	14.87	12.52	0.31	7.77	8.02	3	0.14	0.13
Yilgarn Block	GEOCHEMISTRY OF ARCHEAN VOLCANIC BELTS IN THE EASTERN GOLDFIELDS REGION OF WESTERN AUSTRALIA	55015	BASALT	-31.2	121.6	2705	0.999935	1394.02	1.94686	49.9	0.5	11.3	11.99		11	13.2	1.3	0.4
Yilgarn, WESTERN AUSTRALIA	ARCHEAN BASIC VOLCANISM IN THE EASTERN GOLDFIELDS PROVINCE, YILGARN BLOCK, WESTERN AUSTRALIA	8	BASALT	-32.2	121.77	2705	0.998387	1380.26	2.01861	49.5	0.92	15.3	11.46	0.19	7.46	11.04	2.65	0.14	0.08
Yilgarn, WESTERN AUSTRALIA	ARCHEAN BASIC VOLCANISM IN THE EASTERN GOLDFIELDS PROVINCE, YILGARN BLOCK, WESTERN AUSTRALIA	18	BASALT	-32.2	121.77	2705	0.996181	1378.23	1.79498	50	0.67	14	11.53	0.23	7.89	11.72	1.68	0.14	0.05
Yilgarn, WESTERN AUSTRALIA	ARCHEAN BASIC VOLCANISM IN THE EASTERN GOLDFIELDS PROVINCE, YILGARN BLOCK, WESTERN AUSTRALIA	6	BASALT	-32.2	121.77	2705	0.999122	1366.93	1.73885	50.6	1.02	15.2	11.12	0.21	6.3	11.85	1.89	0.31	0.08
Yilgarn, WESTERN AUSTRALIA	ARCHEAN BASIC VOLCANISM IN THE EASTERN GOLDFIELDS PROVINCE, YILGARN BLOCK, WESTERN AUSTRALIA	17	BASALT	-32.2	121.77	2705	0.996069	1341.61	1.54471	51.4	0.7	15.2	10.63	0.23	6.89	11.95	2.15	0.13	0.05
Yilgarn Block	GEOCHEMISTRY OF ARCHEAN VOLCANIC BELTS IN THE EASTERN GOLDFIELDS REGION OF WESTERN AUSTRALIA	63295	BASALT	-30.95	121.17	2705	0.999467	1303.29	1.47829	50.74	0.72	15.79	9.59	0.21	7.82	11.87	2.92	0.09	0.11
Yilgarn Block	GEOCHEMISTRY OF ARCHEAN VOLCANIC BELTS IN THE EASTERN GOLDFIELDS REGION OF WESTERN AUSTRALIA	63298	BASALT	-30.95	121.17	2705	0.997901	1244.81	1.09639	53.19	0.73	15.87	8.24	0.2	7.42	10.17	3.87	0.11	0.11
North China Craton	GEOCHEMICAL CHARACTERISTICS OF THE NEOARCHEAN (2800-2700 MA) TAISHAN GREENSTONE BELT, NORTH CHINA CRATON: EVIDENCE FOR PLUME-CRATON INTERACTION	2004-25	BASALT	36.0345	117.6	2704	0.9901	1437.34	2.20542	49.57	0.33	9.55	13.09	0.31	11.64	12.32	0.81	0.48
North China Craton	GEOCHEMICAL CHARACTERISTICS OF THE NEOARCHEAN (2800-2700 MA) TAISHAN GREENSTONE BELT, NORTH CHINA CRATON: EVIDENCE FOR PLUME-CRATON INTERACTION	2004-24	BASALT	36.0633	117.573	2704	0.989934	1412.23	2.1865	49.65	0.33	15.07	12.32	0.21	7.07	10.72	2.46	0.12
North China Craton	GEOCHEMICAL CHARACTERISTICS OF THE NEOARCHEAN (2800-2700 MA) TAISHAN GREENSTONE BELT, NORTH CHINA CRATON: EVIDENCE FOR PLUME-CRATON INTERACTION	2004-46B	BASALT	36.4283	117.466	2704	0.982968	1381.28	1.86719	51.63	0.33	14.17	11.75	0.2	6.82	9.93	2.74	0.64
North China Craton	GEOCHEMICAL CHARACTERISTICS OF THE NEOARCHEAN (2800-2700 MA) TAISHAN GREENSTONE BELT, NORTH CHINA CRATON: EVIDENCE FOR PLUME-CRATON INTERACTION	2004-46A	BASALT	36.4283	117.466	2704	0.95434	1378.64	1.85361	51.72	0.33	14.48	11.66	0.2	6.5	9.79	2.83	0.67
Abitibi	QUANTITATIVE TRACE-ELEMENT MODELLING OF THE CRYSTALLIZATION HISTORY OF THE KINOJÉVIS AND BLAKE RIVER GROUPS, ABITIBI GREENSTONE BELT, ONTARIO	F-637	BASALT	48.4	-81.3	2704	0.999813	1358.29	1.59087	50.36	0.95	13.99	11.11	0.19	8.13	11.48	1.39	0.19	0.04
North China Craton	GEOCHEMICAL CHARACTERISTICS OF THE NEOARCHEAN (2800-2700 MA) TAISHAN GREENSTONE BELT, NORTH CHINA CRATON: EVIDENCE FOR PLUME-CRATON INTERACTION	2004-19	BASALT	36.0612	117.571	2704	0.985318	1332.01	1.40346	51.49	0.33	11.69	10.66	0.19	10.77	11.31	1.9	0.18
North China Craton	GEOCHEMICAL CHARACTERISTICS OF THE NEOARCHEAN (2800-2700 MA) TAISHAN GREENSTONE BELT, NORTH CHINA CRATON: EVIDENCE FOR PLUME-CRATON INTERACTION	2004-22	BASALT	36.061	117.569	2704	0.978705	1276.42	0.867965	51.78	0.33	7.06	9.24	0.19	16.76	12.5	0.77	0.3
Abitibi	QUANTITATIVE TRACE-ELEMENT MODELLING OF THE CRYSTALLIZATION HISTORY OF THE KINOJÉVIS AND BLAKE RIVER GROUPS, ABITIBI GREENSTONE BELT, ONTARIO	86-6A	BASALT	48.5	-79.03	2704	0.992845	1254.73	0.961623	52.45	1.05	16.44	8.55	0.13	6.74	8.56	2.25	0.47	0.04
Yilgarn	PHOSPHORUS AND HIGH FIELD STRENGTH ELEMENT ANOMALIES IN ARCHEAN HIGH-MAGNESIAN MAGMAS AS POSSIBLE INDICATORS OF SOURCE MINERALOGY AND DEPTH	372682	BASALT	-32.2	121.77	2702	0.977847	1416.17	2.30649	45.5	0.56	12.1	12.06	0.23	14.8	7.77	1.06	0.09	0.05
Yilgarn	PHOSPHORUS AND HIGH FIELD STRENGTH ELEMENT ANOMALIES IN ARCHEAN HIGH-MAGNESIAN MAGMAS AS POSSIBLE INDICATORS OF SOURCE MINERALOGY AND DEPTH	372679	BASALT	-32.2	121.77	2702	0.938451	1352.77	1.47009	48.4	0.54	11.7	10.98	0.21	12.8	8.2	0.81	0.09	0.05
esatern Dharwar	BONINITES FROM THE NEOARCHAEAN GADWAL GREENSTONE BELT, EASTERN DHARWAR CRATON, INDIA: IMPLICATIONS FOR ARCHAEAN SUBDUCTION PROCESSES	THOLEIITE	THOLEIITE	15.5	77.5	2702	0.971687	1347.31	1.67888	51.62	1.91	12.8	10.72	0.13	6.72	11.03	3.32	0.27	0.3
Superior	SM-ND STUDY OF ARCHEAN ALKALIC ROCKS FROM THE SUPERIOR PROVINCE OF THE CANADIAN SHIELD	A903	TRACHYBASALT	48.17	-79.75	2702	0.999955	1267.91	1.60321	52.1	0.85	15.28	8.6	0.14	7	8.82	3.55	3.65
Abitibi	GEOLOGY AND PETROGENESIS OF THE ARCHEAN ABITIBI BELT IN THE KIRKLAND LAKE AREA, ONTARIO	8	BASALT	48.2	-80	2701.5	0.999711	1511.4	3.26397	47.61	1.24	13.8	14.36		6.13	11.25	2.1	0.44
Abitibi	GEOLOGY AND PETROGENESIS OF THE ARCHEAN ABITIBI BELT IN THE KIRKLAND LAKE AREA, ONTARIO	72D536	BASALT	48.25	-79.5	2701.5	0.999935	1380.54	2.04342	46.6	0.83	14.5	11.17	0.2	9.29	10.5	1.7	0.17	0.05
Abitibi	GEOLOGY AND PETROGENESIS OF THE ARCHEAN ABITIBI BELT IN THE KIRKLAND LAKE AREA, ONTARIO	73J1089	BASALT	48.25	-79.5	2701.5	0.99993	1369.23	1.99764	47.7	1.11	15.7	10.71	0.2	6.39	11.7	2.18	0.48	0.09
Abitibi	GEOLOGY AND PETROGENESIS OF THE ARCHEAN ABITIBI BELT IN THE KIRKLAND LAKE AREA, ONTARIO	72J507	BASALT	48.25	-79.5	2701.5	0.999935	1353.33	1.76518	48.1	1.02	15.8	10.89		9.97	9.86	1.56	0.1
Abitibi	GEOLOGY AND PETROGENESIS OF THE ARCHEAN ABITIBI BELT IN THE KIRKLAND LAKE AREA, ONTARIO	72J505	BASALT	48.25	-79.5	2701.5	0.999935	1295.05	1.44482	47.7	0.73	17.3	9.36		9.76	8.97	1.43	0.63
Superior	LITHOGEOCHEMISTRY OF ALTERED ROCKS AT THE NEW INSCO VMS DEPOSIT, NORANDA, QUEBEC	E9147	basalt	48.5	-79.03	2700.5	0.997809	1471.76	3.21698	45.67	0.74	14.13	13.16	0	9.1	12.85	0.12	2.73	0.04
Rae Province, Canada	THE ARCHEAN MURMAC BAY GROUP: EVIDENCE FOR A GIANT ARCHEAN RIFT IN THE RAE PROVINCE, CANADA	4700-0024	BASALT	59.6	-109	2700.5	0.999861	1406.55	2.26737	48.37	1.27	14.4	12.06	0.191	7.79	10.24	2.03	0.85	0.14
Superior	LITHOGEOCHEMISTRY OF ALTERED ROCKS AT THE NEW INSCO VMS DEPOSIT, NORANDA, QUEBEC	E9121	basalt	48.5	-79.03	2700.5	0.99705	1251.12	0.940449	51.72	0.81	15.16	8.18	0	6.79	14.28	0.16	1.88	0.11
Superior Province	PROGRESSIVE METAMORPHISM OF KOMATIITES AND RELATED ARCHEAN LAVAS OF THE ABITIBI AREA, CANADA	837J	BASALT	48.2	-80.1	2700	0.999935	1445.27	2.59202	49.2	0.69	11.7	13.27	0.21	10.9	9.67	2.94	0.02
western superior province	PROGRESSIVE METAMORPHISM OF KOMATIITES AND RELATED ARCHEAN LAVAS OF THE ABITIBI AREA, CANADA	411B	BASALT	48.08	-80.08	2700	0.999935	1426.99	2.65737	47.7	0.61	16.2	12.1	0.2	6.48	12.9	2.96	0.15
Superior Province	PROGRESSIVE METAMORPHISM OF KOMATIITES AND RELATED ARCHEAN LAVAS OF THE ABITIBI AREA, CANADA	406A	BASALT	48.08	-80.08	2700	0.999816	1416.29	2.70938	47.8	1.29	13.3	12.1	0.18	8.7	9.57	2.83	2.09
Yilgarn, WESTERN AUSTRALIA	CRUSTALLY CONTAMINATED KOMATIITES AND BASALTS FROM KAMBALDA, WESTERN AUSTRALIA	KD4088844 FT	BASALT	-31.2	121.67	2700	0.995312	1404.75	2.43947	46.77	0.66	14.48	12	0.19	15.96	8.21	1.63	0.04	0.06
WESTERN AUSTRALIA	ARCHEAN ULTRAMAFIC, MAFIC, AND ASSOCIATED ROCKS, MT. MONGER, WESTERN AUSTRALIA	8	BASALT	-31	122	2700	0.99993	1381.7	1.81347	52	0.62	10.9	12	0.2	10.2	10.6	2.69	0.17	0.08
Yilgarn, WESTERN AUSTRALIA	CRUSTALLY CONTAMINATED KOMATIITES AND BASALTS FROM KAMBALDA, WESTERN AUSTRALIA	CD339283.7 M	BASALT	-31.2	121.67	2700	0.99922	1367.99	1.73533	51.05	0.56	11.77	11.8	0.2	13.74	8.66	1.49	0.69	0.04
Yilgarn, WESTERN AUSTRALIA	CRUSTALLY CONTAMINATED KOMATIITES AND BASALTS FROM KAMBALDA, WESTERN AUSTRALIA	KD4088760 FT	BASALT	-31.2	121.67	2700	0.999251	1337.63	1.50089	49.99	0.64	14.52	10.92	0.2	13.5	9.19	0.82	0.16	0.07
Yilgarn, WESTERN AUSTRALIA	CRUSTALLY CONTAMINATED KOMATIITES AND BASALTS FROM KAMBALDA, WESTERN AUSTRALIA	CD3391005.8 M	BASALT	-31.2	121.67	2700	0.998953	1333.48	1.59785	49.98	0.66	14.44	10.45	0.23	9.98	12.22	1.82	0.14	0.09
Yilgarn, WESTERN AUSTRALIA	ARCHEAN MAFIC AND ULTRAMAFIC ROCK ASSOCIATIONS IN THE EASTERN GOLDFIELDS REGION, WESTERN AUSTRALIA	7	BASALT	-31.2	121.6	2700	0.999935	1333.3	1.56399	48.83	0.43	11.9	10.3	0.17	12.82	12.71	1.33	0.11	0.07
Yilgarn, WESTERN AUSTRALIA	CRUSTALLY CONTAMINATED KOMATIITES AND BASALTS FROM KAMBALDA, WESTERN AUSTRALIA	CD339700.4 M	BASALT	-31.2	121.67	2700	0.999318	1326.04	1.2349	53.84	0.71	14.67	10.68	0.16	7.14	10.74	1.58	0.4	0.08
Yilgarn, WESTERN AUSTRALIA	ARCHEAN BASIC VOLCANISM IN THE EASTERN GOLDFIELDS PROVINCE, YILGARN BLOCK, WESTERN AUSTRALIA	16	BASALT	-31.2	121.6	2700	0.998669	1324.48	1.51331	49.8	0.45	12.14	10.22	0.22	12.1	11.96	1.87	0.12	0.03
WESTERN AUSTRALIA	ARCHEAN ULTRAMAFIC, MAFIC, AND ASSOCIATED ROCKS, MT. MONGER, WESTERN AUSTRALIA	6	BASALT	-31	122	2700	0.999935	1319.59	1.39433	49.1	0.46	10	10	0.22	17	11.8	0.72	0.11	0.05
Yilgarn, WESTERN AUSTRALIA	ARCHEAN BASIC VOLCANISM IN THE EASTERN GOLDFIELDS PROVINCE, YILGARN BLOCK, WESTERN AUSTRALIA	12	BASALT	-31.7	121.67	2700	0.992729	1318.25	1.30216	51.1	0.72	14.9	10.13	0.18	7.77	11.93	1.48	0.08	0.06
Yilgarn, WESTERN AUSTRALIA	ARCHEAN BASIC VOLCANISM IN THE EASTERN GOLDFIELDS PROVINCE, YILGARN BLOCK, WESTERN AUSTRALIA	13	BASALT	-31.7	121.67	2700	0.999428	1316.28	1.27126	51.3	0.7	14.5	10.08	0.18	7.72	11.89	1.56	0.07	0.06
Yilgarn, WESTERN AUSTRALIA	CRUSTALLY CONTAMINATED KOMATIITES AND BASALTS FROM KAMBALDA, WESTERN AUSTRALIA	CD339W31056.1 M	BASALT	-31.2	121.67	2700	0.998718	1315.15	1.37702	51.72	0.67	14.81	10.39	0.18	10.31	9.58	2.11	0.16	0.07
Yilgarn, WESTERN AUSTRALIA	ARCHEAN MAFIC AND ULTRAMAFIC ROCK ASSOCIATIONS IN THE EASTERN GOLDFIELDS REGION, WESTERN AUSTRALIA	9	BASALT	-31	122	2700	0.999935	1313.42	1.38283	47.42	0.45	9.71	9.63	0.21	16.39	11.44	0.7	0.11	0.05
Yilgarn, WESTERN AUSTRALIA	ARCHEAN BASIC VOLCANISM IN THE EASTERN GOLDFIELDS PROVINCE, YILGARN BLOCK, WESTERN AUSTRALIA	23	BASALT	-31.78	121.8	2700	0.999813	1312.08	1.36777	53	0.71	13.04	10.26	0.17	8.82	8.31	3.81	0.05	0.07
Yilgarn, WESTERN AUSTRALIA	ARCHEAN BASIC VOLCANISM IN THE EASTERN GOLDFIELDS PROVINCE, YILGARN BLOCK, WESTERN AUSTRALIA	15	BASALT	-31.2	121.6	2700	0.999912	1311.7	1.24379	52.4	0.74	14.3	9.99	0.22	7.03	11.97	2.04	0.08	0.07
Yilgarn, WESTERN AUSTRALIA	CRUSTALLY CONTAMINATED KOMATIITES AND BASALTS FROM KAMBALDA, WESTERN AUSTRALIA	KD330770.0 FT	BASALT	-31.2	121.67	2700	0.998837	1308.82	1.66264	50.85	0.77	16.4	9.84	0.17	8.64	8.93	4.2	0.11	0.09
Yilgarn, WESTERN AUSTRALIA	ARCHEAN MAFIC AND ULTRAMAFIC ROCK ASSOCIATIONS IN THE EASTERN GOLDFIELDS REGION, WESTERN AUSTRALIA	8	BASALT	-31	122	2700	0.999935	1308.05	1.45949	49.06	0.48	11.08	9.84	0.16	14.02	7.86	2.66	0.12	0.06
Yilgarn, WESTERN AUSTRALIA	CRUSTALLY CONTAMINATED KOMATIITES AND BASALTS FROM KAMBALDA, WESTERN AUSTRALIA	CD339205.5 M	BASALT	-31.2	121.67	2700	0.999295	1305.59	1.16482	52.72	0.6	12.04	10.34	0.18	12.46	9.76	0.69	1.16	0.06
Yilgarn, WESTERN AUSTRALIA	CRUSTALLY CONTAMINATED KOMATIITES AND BASALTS FROM KAMBALDA, WESTERN AUSTRALIA	CD339345.5 M	BASALT	-31.2	121.67	2700	0.999081	1303.8	1.25146	52.89	0.56	11.44	10.37	0.17	14.08	7.58	1.53	1.31	0.06
Pilbara	A COMPARATIVE STUDY OF THE GEOCHEMICAL AND ISOTOPIC SYSTEMATICS OF LATE ARCHEAN FLOOD BASALTS FROM THE PILBARA AND KAAPVAAL CRATONS	GSWA100529	BASALT	-25.87	24.73	2700	0.938638	1303.57	1.25092	52.1	0.64	12.8	9.8	0.18	7.56	9.57	2.7	0.58	0.07
Yilgarn, WESTERN AUSTRALIA	CRUSTALLY CONTAMINATED KOMATIITES AND BASALTS FROM KAMBALDA, WESTERN AUSTRALIA	CD339478.2 M	BASALT	-31.2	121.67	2700	0.998956	1302.64	1.19897	53.42	0.63	12.61	10.3	0.18	11.62	8.53	2.38	0.27	0.05
Yilgarn, WESTERN AUSTRALIA	CRUSTALLY CONTAMINATED KOMATIITES AND BASALTS FROM KAMBALDA, WESTERN AUSTRALIA	CD339160.4 M	BASALT	-31.2	121.67	2700	0.99964	1299.05	1.1899	52.56	0.6	12.29	10.07	0.18	12.38	9.72	2.12	0.01	0.06
Superior Province	AN ARCHEAN ARC BASALT-NB-ENRICHED BASALT-ADAKITE ASSOCIATION: THE 2.7 GA CONFEDERATION ASSEMBLAGE OF THE BIRCH-UCHI GREENSTONE BELT, SUPERIOR PROVINCE	SL87-05	BASALT	51	-91	2700	0.995555	1296.59	1.59515	49.95	0.57	18.02	9.49	0.27	8.57	8.09	3.9	0.05	0.04
Western Churchill Province	NEOARCHAEAN VOLCANIC ROCKS, CENTRAL HEARNE SUPRACRUSTAL BELT, WESTERN CHURCHILL PROVINCE, CANADA: GEOCHEMICAL AND ISOTOPIC EVIDENCE SUPPORTING INTRA-OCEANIC SUPRA-SUBDUCTION ZONE EXTENSION	HS541	BASALT	62	-94.5	2700	0.906996	1292.28	1.13231	49.3	0.56	14.9	9.36	0.14	9.02	10.76	1	0.04	0.04
Yilgarn, WESTERN AUSTRALIA	CRUSTALLY CONTAMINATED KOMATIITES AND BASALTS FROM KAMBALDA, WESTERN AUSTRALIA	CD339659.4 M	BASALT	-31.2	121.67	2700	0.999825	1281.92	1.18389	52.81	0.58	14.81	9.41	0.16	8.48	10.7	2.32	0.63	0.06
WESTERN AUSTRALIA	ARCHEAN ULTRAMAFIC, MAFIC, AND ASSOCIATED ROCKS, MT. MONGER, WESTERN AUSTRALIA	10	BASALT	-31	122	2700	0.99993	1280.22	1.18028	53	0.53	13.6	9.2	0.15	8	11.8	3.1	0.17	0.08
Western Dharwar	GEOCHEMISTRY OF TWO STRATIGRAPHICALLY-RELATED ULTRAMAFIC (KOMATIITE) LAYERS FROM THE NEOARCHEAN SIGEGUDDA GREENSTONE TERRANE, WESTERN DHARWAR CRATON, INDIA: EVIDENCE FOR COMPOSITIONAL DIVERSITY IN ARCHEAN MANTLE PLUMES	SIG-114	BASALT	13.08	76	2700	0.978158	1257.87	0.641497	50.8	0.84	12.13	9.09	0.15	16.9	3.96	0.09	0.05	0.18
WESTERN AUSTRALIA	ARCHEAN ULTRAMAFIC, MAFIC, AND ASSOCIATED ROCKS, MT. MONGER, WESTERN AUSTRALIA	7	BASALT	-31	122	2700	0.99993	1254.22	0.890157	50.5	0.46	11	8.4	0.16	13.2	14.7	1	0.11	0.1
Abitibi	TRACE ELEMENT CHARACTERISTICS OF KOMATIITES AND KOMATIITIC BASALTS FROM THE ABITIBI METAVOLCANIC BELT OF QUEBEC	5	BASALT	48.5	-79.2	2700	0.991048	1252.47	0.803825	50.7	0.5	8.6	8.6		16.6	10.2	1.1	0.01	0.03
Superior Province	HIGH-PRECISION EXPLORATION GEOCHEMISTRY: APPLICATIONS FOR VOLCANOGENIC MASSIVE SULFIDE DEPOSITS	KC-506-B	THOLEIITE	48.7	-81.4	2700	0.918032	1248.82	1.16457	52.55	0.31	15.94	8.8	0.2	12.8	3.79	4.6		0.04
Superior Province	PROGRESSIVE METAMORPHISM OF KOMATIITES AND RELATED ARCHEAN LAVAS OF THE ABITIBI AREA, CANADA	218	BASALT	48.3	-78.85	2700	0.999837	1230.98	1.00563	49.3	1.23	17	7.68	0.2	7.54	5.37	3.08	0.43
Abitibi	TRACE ELEMENT CHARACTERISTICS OF KOMATIITES AND KOMATIITIC BASALTS FROM THE ABITIBI METAVOLCANIC BELT OF QUEBEC	3	BASALT	48.5	-79.2	2700	0.998814	1228.69	1.00031	51.4	0.8	12.9	7.9		11.1	7.9	3.7	0.1	0.05
Superior	GEOCHEMICAL EVOLUTION IN THE BLAKE RIVER GROUP, ABITIBI GREENSTONE BELT, SUPERIOR PROVINCE	594	BASALT	48.28	-80.23	2699.5	0.993043	1363.37	1.78107	50.39	0.33	13.77	11.13	0.2	7.34	9	2.8	0.76	0.07
Superior	GEOCHEMICAL EVOLUTION IN THE BLAKE RIVER GROUP, ABITIBI GREENSTONE BELT, SUPERIOR PROVINCE	592	BASALT	48.28	-80.23	2699.5	0.994825	1327.07	1.62327	47.49	0.33	15.43	9.61	0.18	6.63	12.43	2.15	0.16	0.43
Superior	GEOCHEMICAL EVOLUTION IN THE BLAKE RIVER GROUP, ABITIBI GREENSTONE BELT, SUPERIOR PROVINCE	593	BASALT	48.28	-80.23	2699.5	0.994917	1305.96	1.42026	50.29	0.33	16.9	9.76	0.15	7.29	4.15	4.41	0.09	0.2
Superior	GEOCHEMICAL EVOLUTION IN THE BLAKE RIVER GROUP, ABITIBI GREENSTONE BELT, SUPERIOR PROVINCE	603	THOLEIITE	48.28	-80.23	2699.5	0.998621	1304.41	1.33926	50.15	0.33	14.74	9.67	0.13	8.46	10.68	1.87	0.51	0.04
Superior	GEOCHEMICAL EVOLUTION IN THE BLAKE RIVER GROUP, ABITIBI GREENSTONE BELT, SUPERIOR PROVINCE	596	BASALT	48.28	-80.23	2699.5	0.997454	1287.22	1.10217	52.97	0.33	14.17	9.67	0.14	8.43	4.39	3.74	0.45	0.17
Superior	MAJOR-ELEMENT GEOCHEMISTRY OF THE NORANDA VOLCANIC BELT, QUEBEC-ONTARIO	1_11	basalt	48.25	-79.02	2699	0.99978	1445.44	2.50769	48.4	1.41	14.08	12.79	0.29	6.02	9.92	2.5	0.28	0.12
Superior	MAJOR-ELEMENT GEOCHEMISTRY OF THE NORANDA VOLCANIC BELT, QUEBEC-ONTARIO	1_12	basalt	48.25	-79.02	2699	0.99993	1365.45	1.81838	49.1	1.02	13.98	10.89	0.21	6.68	10.29	2.72	0.17	0.08
Abitibi, CANADA	ARCHEAN SHOSHONITES FROM THE ABITIBI GREENSTONE BELT, CHIBOUGAMU /QUEBEC, CANADA): GEOCHEMISTRY AND TECTONIC SETTING	JW-18	BASALT	49.87	-74.35	2697.5	0.948269	1149.2	0.527008	53.86	0.5	12.96	5.52	0.13	6.42	7.19	4.4	0.5	0.46
Yilgarn Craton	ELEMENTAL AND ND-ISOTOPE SYSTEMATICS OF THE UPPER BASALT UNIT, 2.7 GA KAMBALDA SEQUENCE: QUANTITATIVE MODELING OF PROGRESSIVE CRUSTAL CONTAMINATION OF PLUME ASTHENOSPHERE	OB1	BASALT	-30.3075	120.993	2697	0.938821	1328.28	1.64198	46.64	0.41	11.21	9.96	0.21	16.65	9	1.23	0.07	0.04
Yilgarn Craton	ELEMENTAL AND ND-ISOTOPE SYSTEMATICS OF THE UPPER BASALT UNIT, 2.7 GA KAMBALDA SEQUENCE: QUANTITATIVE MODELING OF PROGRESSIVE CRUSTAL CONTAMINATION OF PLUME ASTHENOSPHERE	13181	BASALT	-30.2593	120.907	2697	0.968349	1312.78	1.4314	49.68	0.5	14.09	10.05	0.19	10.77	8.71	2.27	0.16	0.05
Yilgarn Craton	ELEMENTAL AND ND-ISOTOPE SYSTEMATICS OF THE UPPER BASALT UNIT, 2.7 GA KAMBALDA SEQUENCE: QUANTITATIVE MODELING OF PROGRESSIVE CRUSTAL CONTAMINATION OF PLUME ASTHENOSPHERE	687-3	BASALT	-31.3792	121.774	2697	0.911074	1270.89	1.20298	52.81	0.67	14.53	8.8	0.15	6.57	10.51	3.57	0.55	0.08
Dharwar Craton	GEOCHEMISTRY AND PETROGENESIS OF DOLERITE DYKES IN AND AROUND KOLAR SCHIST BELT, SOUTH INDIA	KGF9A	THOLEIITE	13.13	78.13	2696	0.993336	1550.93	3.53748	49.1	1.45	13.37	17.88	0.22	6.21	8.3	2.21	0.36	0.07
Dharwar Craton	GEOCHEMISTRY AND PETROGENESIS OF DOLERITE DYKES IN AND AROUND KOLAR SCHIST BELT, SOUTH INDIA	KGF3B	THOLEIITE	13.13	78.13	2696	0.989309	1534.48	3.34515	51.24	1.31	13.95	16.01	0.21	6.88	9.45	2.45	0.4	0.07
Dharwar Craton	PETROGENESIS OF AMPHIBOLITES IN THE KOLAR SCHIST BELT, INDIA - A PRELIMINARY REPORT	45948	BASALT	13.13	78.13	2696	0.995125	1515.58	3.55087	45.05	1.3	11.89	14.16	0.23	14.97	10.79	0.7	0.06
Dharwar Craton	GEOCHEMISTRY AND PETROGENESIS OF DOLERITE DYKES IN AND AROUND KOLAR SCHIST BELT, SOUTH INDIA	KGF4	THOLEIITE	13.13	78.13	2696	0.999707	1514.99	3.33664	48.91	1.26	14.24	14.98		7.21	10.45	2.54	0.36	0.08
Dharwar Craton	GEOCHEMISTRY AND PETROGENESIS OF DOLERITE DYKES IN AND AROUND KOLAR SCHIST BELT, SOUTH INDIA	KGF1	THOLEIITE	13.13	78.13	2696	0.997586	1514.43	3.08416	50.3	1.07	13.85	15.37	0.23	7.62	8.7	2.29	0.28	0.06
Dharwar Craton	GEOCHEMISTRY AND PETROGENESIS OF DOLERITE DYKES IN AND AROUND KOLAR SCHIST BELT, SOUTH INDIA	KGF6	THOLEIITE	13.13	78.13	2696	0.99974	1500.21	2.99264	49.7	1.26	13.37	14.73	0.23	7.2	9.95	2.21	0.36	0.08
Dharwar Craton	PETROGENESIS OF AMPHIBOLITES IN THE KOLAR SCHIST BELT, INDIA - A PRELIMINARY REPORT	45760	BASALT	13.13	78.13	2696	0.99909	1494.81	3.16716	46.43	1.17	11.67	14.02	0.17	14.06	10.88	0.86	0.14
Dharwar Craton	GEOCHEMISTRY AND PETROGENESIS OF DOLERITE DYKES IN AND AROUND KOLAR SCHIST BELT, SOUTH INDIA	KGF8	THOLEIITE	13.13	78.13	2696	0.999925	1467.14	3.08571	47.71	1.06	13.79	13.25	0.22	7.46	11	3.43	0.45	0.07
Dharwar Craton	GEOCHEMISTRY AND PETROGENESIS OF DOLERITE DYKES IN AND AROUND KOLAR SCHIST BELT, SOUTH INDIA	KGF7	THOLEIITE	13.13	78.13	2696	0.998597	1452	2.63223	48.72	1.08	13.97	13.25	0.22	7.62	10.6	2.29	0.39	0.08
Dharwar Craton	GEOCHEMISTRY AND PETROGENESIS OF DOLERITE DYKES IN AND AROUND KOLAR SCHIST BELT, SOUTH INDIA	KGF2	THOLEIITE	13.13	78.13	2696	0.999955	1435.87	2.36056	50.41	0.93	14	13.25	0.21	8.21	9.45	2.45	0.32	0.06
Dharwar Craton	PETROGENESIS OF AMPHIBOLITES IN THE KOLAR SCHIST BELT, INDIA - A PRELIMINARY REPORT	45760	BASALT	13.13	78.13	2696	0.999935	1435.87	2.57786	47.07	0.92	11.84	12.62		14.87	11.49	0.97	0.21
Dharwar Craton	GEOCHEMISTRY AND PETROGENESIS OF DOLERITE DYKES IN AND AROUND KOLAR SCHIST BELT, SOUTH INDIA	KGF3A	THOLEIITE	13.13	78.13	2696	0.999725	1431.23	2.17475	51.8	1.24	14.3	13.25	0.2	6.71	9.45	2.29	0.34	0.07
Dharwar Craton	GEOCHEMISTRY AND PETROGENESIS OF AMPHIBOLITES, KOLAR SCHIST BELT, SOUTH INDIA: EVIDENCE FOR KOMATIITE MAGMA DERIVED BY LOW PERCENTAGES OF MELTING OF THE MANTLE	13-5B	THOLEIITE	13.13	78.13	2696	0.995764	1411.78	1.85034	51.55	0.98	13.35	12.86	0.16	8.47	10.22	1.21	0.08
Dharwar Craton	PETROGENESIS OF AMPHIBOLITES IN THE KOLAR SCHIST BELT, INDIA - A PRELIMINARY REPORT	18-14	BASALT	13.13	78.13	2696	0.999404	1411.09	2.10066	50.74	1.14	14.79	12.47	0.15	7.17	11.81	2.01	0.07
Dharwar Craton	GEOCHEMISTRY AND PETROGENESIS OF AMPHIBOLITES, KOLAR SCHIST BELT, SOUTH INDIA: EVIDENCE FOR KOMATIITE MAGMA DERIVED BY LOW PERCENTAGES OF MELTING OF THE MANTLE	301	THOLEIITE	13.13	78.13	2696	0.999002	1408.88	2.05848	51.31	1.03	13.65	12.73	0.21	8.78	9.22	2.48	0.2
Dharwar Craton	GEOCHEMISTRY AND PETROGENESIS OF AMPHIBOLITES, KOLAR SCHIST BELT, SOUTH INDIA: EVIDENCE FOR KOMATIITE MAGMA DERIVED BY LOW PERCENTAGES OF MELTING OF THE MANTLE	K-20	THOLEIITE	13.13	78.13	2696	0.998875	1404.97	2.03988	51.11	1.01	15.58	12.86	0.25	9.45	6.3	2.57	0.38
Dharwar Craton	GEOCHEMISTRY AND PETROGENESIS OF AMPHIBOLITES, KOLAR SCHIST BELT, SOUTH INDIA: EVIDENCE FOR KOMATIITE MAGMA DERIVED BY LOW PERCENTAGES OF MELTING OF THE MANTLE	18-14	THOLEIITE	13.13	78.13	2696	0.984921	1403.19	2.01482	50.59	1.15	14.74	12.3	0.16	7.2	11.29	1.99	0.07
Dharwar Craton	GEOCHEMISTRY AND PETROGENESIS OF AMPHIBOLITES, KOLAR SCHIST BELT, SOUTH INDIA: EVIDENCE FOR KOMATIITE MAGMA DERIVED BY LOW PERCENTAGES OF MELTING OF THE MANTLE	K-2	THOLEIITE	13.13	78.13	2696	0.991909	1390.88	1.92674	50.32	0.66	14.9	11.93	0.19	7.3	10.52	2.19	0.11
Dharwar Craton	GEOCHEMISTRY AND PETROGENESIS OF AMPHIBOLITES, KOLAR SCHIST BELT, SOUTH INDIA: EVIDENCE FOR KOMATIITE MAGMA DERIVED BY LOW PERCENTAGES OF MELTING OF THE MANTLE	45800	THOLEIITE	13.13	78.13	2696	0.994977	1387.6	1.96411	50.05	0.81	14.85	11.77	0.2	7.66	11.68	2.13	0.07
Dharwar Craton	GEOCHEMISTRY AND PETROGENESIS OF AMPHIBOLITES, KOLAR SCHIST BELT, SOUTH INDIA: EVIDENCE FOR KOMATIITE MAGMA DERIVED BY LOW PERCENTAGES OF MELTING OF THE MANTLE	K-14	THOLEIITE	13.13	78.13	2696	0.998549	1385.39	1.73205	52.61	1.4	14.11	12.22	0.16	7.3	7.7	2.76	0.14
Dharwar Craton	PETROGENESIS OF AMPHIBOLITES IN THE KOLAR SCHIST BELT, INDIA - A PRELIMINARY REPORT	13-5C	THOLEIITE	13.13	78.13	2696	0.999935	1376.04	1.63494	51.27	1.16	15.26	11.67	0.19	6.88	11.81	0.95	0.16
Dharwar Craton	GEOCHEMISTRY AND PETROGENESIS OF AMPHIBOLITES, KOLAR SCHIST BELT, SOUTH INDIA: EVIDENCE FOR KOMATIITE MAGMA DERIVED BY LOW PERCENTAGES OF MELTING OF THE MANTLE	13-5C	THOLEIITE	13.13	78.13	2696	0.995595	1376.04	1.63494	51.27	1.16	15.26	11.67	0.19	6.88	11.81	0.95	0.16
Dharwar Craton	GEOCHEMISTRY AND PETROGENESIS OF AMPHIBOLITES, KOLAR SCHIST BELT, SOUTH INDIA: EVIDENCE FOR KOMATIITE MAGMA DERIVED BY LOW PERCENTAGES OF MELTING OF THE MANTLE	13-5A	THOLEIITE	13.13	78.13	2696	0.991201	1374.66	1.76354	50.3	1.05	14.98	11.31	0.34	6.73	13.56	1.41
[truncated: 109 more rows]

## Sheet: Sr
Craton	REFERENCE	SAMPLE_ID	ROCK_NAME	LATITUDE	LONGITUDE	C_AGE	Arc_probability3	SIO2	TIO2	AL2O3	FEOT	MNO	MGO	CAO	NA2O	K2O	P2O5	SR
[truncated: 275 more rows]
