# Supplementary material for: Intensified biogeodynamical carbon cycling by subduction controlled early Earth glaciations and oxygenation
Source: Research Square preprint supplement (doi:10.21203/rs.3.rs-8738396/v1), 2026-02-02
Supplement: Supplementary file 3 [file afe8aa3b4036d0f33c6bd914.xlsx]

## Sheet: climate_initial_parameters
	Parameter inputs in codes	Value	Unit	Description	Note
	crb_tau	10 to 30	Myr	Carbonate return delay by arc	From refs.9, 29
	org_tau	200 to 500	Myr	Organic return delay by OIB
	fogi	1e-06	%	Initial organic burial fraction	Very low; No biological activity
	chi_org_i	10	%	Initial organic subduction fraction	From refs.9, 29
	chi_carb_i	10	%	Initial carbonate subduction fraction
	alpha_org	0	%	Arc return organic	From this study (Fig. 3) and ref.22
	alpha_crb	20 (cold) or 100 (hot)	%	Arc return carbonate	From this study (Fig. 3)
	orgc4	0	%	Permanent organic subduction	From refs.9, 29
	crbc4	0	%	Permanent carbonate subduction
	ki	1e-10	%	Initial weathering coefficient	Very low; From refs.9, 29
	k_change1	0.01	%	Enhanced weathering	From refs.9, 29
	chi_carb_2	90	%	High carbonate subduction
	chi_org_2	90	%	High organic subduction
	chi_carb_3	10	%	Low carbonate subduction
	chi_org_3	10	%	Low organic subduction
	fog2	0.001	%	Mid burial fraction	Modern is 20%; From ref.1, 9, 29
	fog3	1 to 20	%	High burial fraction
	c_atmi	0	g	Initial atmospheric carbon	From refs.9, 29
	c_crbi	0	g	Initial carbonate carbon
	c_orgi	0	g	Initial organic carbon
	c_mcrbi	0	g	Initial mantle carbonate
	c_morgi	0	g	Initial mantle organic
	c_mntli	1e+23	g	Initial mantle total carbon
	d13C_atmi	-5	‰	Initial atm d13C
	d13C_crbi	0	‰	Initial carb d13C
	d13C_orgi	-25	‰	Initial org d13C
	d13C_prim	-5	‰	Primitive mantle d13C
	F_mori	1E+17 to 1E18	g/Myr	Initial MOR flux	Modern is ~1E19; From ref.1, 9, 29
	F_oibi	10000000000000	g/Myr	Initial OIB flux	Very low; No activity
	F_arci	10000000000000	g/Myr	Initial arc flux
	k17	9.3e+19	-	Oxidation rate coefficient	From refs.9, 29
	G	1.5e+22	g	Total organic C reservoir
	U	100	%	Scaling factor
	pres_o2	1.0815e+21	g	Modern O mass
	Archean_CH₄	100 to 10000	ubar	Archean atmospheric CH₄	From refs.36-37
	Huronian_glaciation_CH4	1 to 10	ubar	Atmospheric CH₄ during the Huronian glaciation
	M_CO₂	44.01	g/mol	CO₂ molar mass	From refs.9, 29
	n_air	1.8e+20	mol	Atmospheric moles
	Solar constant fraction	82	%	the ratio of solar luminosity relative to today	From refs.36-37
