# Supplementary material for: Intensified biogeodynamical carbon cycling by subduction controlled early Earth glaciations and oxygenation
Source: Research Square preprint supplement (doi:10.21203/rs.3.rs-8738396/v1), 2026-02-02
Supplement: Supplementary file 4 [file f2b5f88fabe831596754659e.xlsx]

## Sheet: sub 1
Carbon release from subduction under different dynamic parameters and sediment compositions
	Case ID	Potential temperature of mantle	Sediment thickness	Thickness of partially hydrated mantle (km)	Thickness of altered oceanic crust (km)	Vc (cm/yr)	Type of sediment	Initial organic carbon ratio (%)	Carbonate release ratio (%)	Organic carbon release ratio (%)	Time (Myrs)
	S1	1500	0.4	0	1.5	5	1	20	100	0	24
	S2	1500	0.4	2	1.5	5	1	10	100	0	24
	S3*	1500	0.4	8	1.5	5	1	20	100	0	24
	S4	1500	0.4	8	1.5	5	1	20	100	0	15
	S5	1500	0.4	8	1.5	5	1	20	100	0	20
	S6	1500	0.4	0	1.5	5	1	1	100	0	24
	S7	1500	0.4	0	7	5	1	20	100	0	24
	S8	1500	0.4	2	7	5	1	10	100	0	24
	S9	1500	0.2	0	1.5	5	1	20	100	0	24
	S10	1500	0.2	0	7	5	1	20	100	0	24
	S11	1500	0.2	2	1.5	5	1	20	100	0	24
	S12	1500	0.1	0	1.5	5	1	20	100	0	24
	S13	1500	0.05	0	1.5	5	1	20	100	0	24
	S14	1350	0.4	0	1.5	5	1	20	24	0	24
	S15	1350	0.4	2	1.5	5	1	20	28	0	24
	S16*	1350	0.4	8	1.5	5	1	20	30	0	24
	S17	1350	0.4	8	1.5	5	1	20	30	0	16
	S18	1350	0.4	8	1.5	5	1	20	30	0	20
	S19	1500	0.4	0	1.5	3	1	20	100	0	24
	S20	1500	0.4	0	1.5	10	1	20	100	0	24
	S21	1500	0.4	0	1.5	5	20% type 2+80% type 3	20	100	0	24
	S22	1500	0.4	0	1.5	5	40% type 2+60% type 3	20	100	0	24
	S23	1500	0.4	0	1.5	5	85% type 2+15% type 3	20	100	0	24
	The asterisk marks the reference model in Figure 3

## Sheet: sub 2
Atmospheric oxidation, temperature changes, and carbon isotope drift in different scenarios of C-O boxing mdeling
	Case ID	Mid ocean ridge carbon degassing (g/Myr)	Organic carbon ratio (%)	Carbonate release ratio (%)	Initial methane (ubar)	The proportion of the atmosphere to the atmospheric and oceanic carbon pool (%)	Atmospheric carbon concentration (bar; 3-2.5Ga)	Arc C release at 2.5Ga (g/Myrs)	Temperature change at 2.5 Ga vs. 20% carbonate release (°C)	Temperature change at 2.5 Ga vs. 100% carbonate release (°C)	Temperature changes due to methane collapse (°C)	Oxygen rising	Carbon isotope (δ¹³C) shift
	C1	1e+17	1	100	10000	20	0.001-0.005	4e+17	3		-14	Yes	Yes
	C2	1e+17	1	20	10000	20	0.0005-0.005	2e+17		-3	-14	Yes	No
	C3	1e+17	20	100	10000	20	0.001-0.005	4e+17	3		-14	Yes	Yes
	C4	1e+17	20	20	10000	20	0.0005-0.005	2e+17		-3	-14	Yes	No
	C5*	1e+17	1	100	10000	50	0.003-0.01	4e+17	4		-13	Yes	Yes
	C6*	1e+17	1	20	10000	50	0.001-0.01	2e+17		-4	-13	Yes	No
	C7	1e+18	1	100	10000	20	0.01-0.05	4e+18	4		-14	Yes	Yes
	C8	1e+18	1	20	10000	20	0.005-0.05	2e+18		-4	-14	Yes	No
	C9	1e+18	20	100	10000	20	0.01-0.05	4e+18	4		-14	Yes	Yes
	C10	1e+18	20	20	10000	20	0.005-0.05	2e+18		-4	-14	Yes	No
	C11	1e+18	1	100	10000	50	0.03-0.1	4e+18	5		-13	Yes	Yes
	C12	1e+18	1	20	10000	50	0.01-0.1	2e+18		-5	-13	Yes	No
	C13	1e+17	1	100	100	20	0.001-0.005	4e+17	3		-6	Yes	Yes
	C14	1e+17	1	20	100	20	0.0005-0.005	2e+17		-3	-6	Yes	No
	C15	1e+18	1	100	100	20	0.01-0.05	4e+18	4		-4	Yes	Yes
	C16	1e+18	1	20	100	20	0.005-0.05	2e+18		-4	-4	Yes	No
	The asterisk marks the reference model in Figure 5				100-10000		0.0004-0.75
					Archean reference value (refs.32, 33)		Archean reference value (ref.32)
